# Supplementary material for: Functional alterations and predictive capacity of gut microbiome in type 2 diabetes
Source: PubMed Central journal article supplement (PMC10725451; doi:10.1038/s41598-023-49679-w), 2023-12-16
Supplement: 41598_2023_49679_MOESM1_ESM.pdf [file 41598_2023_49679_MOESM1_ESM.pdf]

## Functional Alterations and Predictive Capacity of Gut Microbiome in Type 2 Diabetes

Nihar Ranjan Dash<sup>1†</sup>, Mohammad T. Al Bataineh<sup>2,3†\*</sup>, Rohia Alili<sup>4,5</sup>, Habiba Al Safar<sup>3</sup>, Noura Alkhayyal<sup>6</sup>, Edi Prifti<sup>4,7</sup>, Jean-Daniel Zucker<sup>4,7</sup>, Eugeni Belda<sup>4,7</sup>, Karine Clément<sup>4,5\*</sup>

**Supplementary information**

**Supplemental Table 1.** Summary reads for each sample with additional metadata

| <b>Code</b> | <b>quality filtered reads</b> | <b>human Reads</b> | <b>quality filtered + human decontaminated reads</b> | <b>Age</b> | <b>Gender</b> | <b>BMI</b>  | <b>Diagnosis</b> | <b>run</b>      | <b>resequenced</b> |
|-------------|-------------------------------|--------------------|------------------------------------------------------|------------|---------------|-------------|------------------|-----------------|--------------------|
| 1240        | 253107                        | 1511               | 251596                                               | 65         | M             | 24.54039467 | Control          | run_202,run_204 | Yes                |
| 5017        | 130858                        | 909                | 129949                                               | 42         | F             | 27.5        | Control          | run_202         | No                 |
| 5230        | 342590                        | 1288               | 341302                                               | 36         | M             | 40.258      | Control          | run_206         | No                 |
| 7701        | 87134                         | 561                | 86573                                                | 72         | F             | 31.2        | T2DM             | run_205         | No                 |
| 8425        | 263836                        | 1532               | 262304                                               | 70         | M             | 16.80613424 | Control          | run_206         | No                 |
| 9559        | 82911                         | 453                | 82458                                                | 65         | M             | 28.003      | Control          | run_208         | No                 |
| 11911       | 89414                         | 352                | 89062                                                | 51         | M             | 22.503      | Control          | run_203,run_207 | Yes                |
| 12657       | 99524                         | 859                | 98665                                                | 61         | F             | 35.3704142  | T2DM             | run_203         | No                 |
| 19166       | 74590                         | 301                | 74289                                                | 38         | F             | 24.2        | Control          | run_208         | No                 |
| 20514       | 111857                        | 443                | 111414                                               | 70         | M             | 26.5625     | T2DM             | run_203         | No                 |
| 25449       | 164377                        | 725                | 163652                                               | 51         | M             | 27.94022092 | Control          | run_200,run_204 | Yes                |
| 29879       | 66603                         | 9063               | 57540                                                | 79         | M             | 39.556      | T2DM             | run_201,run_207 | Yes                |
| 30424       | 229783                        | 669                | 229114                                               | 65         | F             | 28.69632964 | T2DM             | run_204         | No                 |
| 30885       | 58710                         | 149                | 58561                                                | 76         | F             | 28.04037814 | T2DM             | run_202,run_204 | Yes                |
| 34669       | 202098                        | 1101               | 200997                                               | 55         | F             | 26.787      | Control          | run_206         | No                 |
| 36909       | 71834                         | 230                | 71604                                                | 91         | F             | 49.82248521 | T2DM             | run_203         | No                 |

|           |        |       |        |        |   |                     |             |                     |     |
|-----------|--------|-------|--------|--------|---|---------------------|-------------|---------------------|-----|
| 369<br>20 | 122446 | 513   | 121933 | 8<br>5 | F | 27.30<br>34383<br>8 | T2D<br>M    | run_206             | No  |
| 377<br>32 | 274825 | 2337  | 272488 | 7<br>3 | F | 36.06<br>64718<br>8 | T2D<br>M    | run_201             | No  |
| 378<br>28 | 107639 | 945   | 106694 | 5<br>8 | M | 28.62<br>1          | T2D<br>M    | run_205             | No  |
| 404<br>37 | 225074 | 891   | 224183 | 4<br>9 | F | 19.77<br>10718      | Cont<br>rol | run_207,run<br>_208 | Yes |
| 423<br>80 | 162652 | 533   | 162119 | 8<br>7 | F | 30.66<br>40625      | T2D<br>M    | run_203,run<br>_208 | Yes |
| 427<br>34 | 201768 | 1584  | 200184 | 7<br>8 | F | 29.47<br>58426<br>2 | T2D<br>M    | run_202,run<br>_204 | Yes |
| 436<br>08 | 28706  | 2329  | 26377  | 7<br>6 | F | 36.84<br>04894<br>5 | T2D<br>M    | run_200             | No  |
| 475<br>90 | 116387 | 1023  | 115364 | 8<br>6 | F | 34.15<br>97225<br>8 | T2D<br>M    | run_201             | No  |
| 480<br>50 | 171766 | 1859  | 169907 | 5<br>2 | M | 28.90<br>50757<br>3 | Cont<br>rol | run_201             | No  |
| 497<br>81 | 110892 | 399   | 110493 | 7<br>4 | M | 24.15<br>16620<br>5 | T2D<br>M    | run_200             | No  |
| 499<br>26 | 102122 | 478   | 101644 | 3<br>2 | M | 16.64               | Cont<br>rol | run_203             | No  |
| 510<br>07 | 69934  | 279   | 69655  | 3<br>6 | F | 24.95<br>6          | Cont<br>rol | run_200,run<br>_207 | Yes |
| 554<br>59 | 296327 | 1815  | 294512 | 6<br>4 | F | 19.09<br>34338<br>4 | T2D<br>M    | run_202,run<br>_204 | Yes |
| 570<br>61 | 71893  | 281   | 71612  | 4<br>9 | F | 23.24<br>27285<br>3 | Cont<br>rol | run_203             | No  |
| 587<br>20 | 213366 | 2508  | 210858 | 2<br>2 | M | 24.91<br>34948<br>1 | Cont<br>rol | run_201             | No  |
| 623<br>51 | 71157  | 319   | 70838  | 6<br>1 | F | 48.32<br>1          | T2D<br>M    | run_203             | No  |
| 635<br>73 | 129020 | 87114 | 41906  | 8<br>2 | F | 32.25<br>5          | T2D<br>M    | run_205             | No  |

|            |        |       |        |        |   |                     |             |                                 |     |
|------------|--------|-------|--------|--------|---|---------------------|-------------|---------------------------------|-----|
| 637<br>12  | 297155 | 1420  | 295735 | 6<br>6 | F | 29.81<br>32857<br>9 | T2D<br>M    | run_200,run<br>_205,run_20<br>8 | Yes |
| 676<br>21  | 67275  | 603   | 66672  | 8<br>7 | F | 20.92<br>83872<br>2 | Cont<br>rol | run_205                         | No  |
| 743<br>17  | 121737 | 2111  | 119626 | 7<br>6 | M | 30.85<br>96073<br>8 | T2D<br>M    | run_201                         | No  |
| 748<br>72  | 76646  | 620   | 76026  | 8<br>3 | M | 41.11<br>84210<br>5 | T2D<br>M    | run_208                         | No  |
| 784<br>51  | 38631  | 526   | 38105  | 3<br>4 | F | 32.46<br>61810<br>6 | Cont<br>rol | run_207                         | No  |
| 826<br>40  | 58945  | 15386 | 43559  | 7<br>8 | M | 23.98<br>37540<br>7 | Cont<br>rol | run_200                         | No  |
| 842<br>77  | 70022  | 257   | 69765  | 5<br>0 | F | 42.38               | T2D<br>M    | run_203                         | No  |
| 857<br>91  | 65547  | 354   | 65193  | 4<br>8 | M | 26.64<br>4          | Cont<br>rol | run_205                         | No  |
| 864<br>55  | 153093 | 519   | 152574 | 6<br>7 | F | 25.68<br>2          | T2D<br>M    | run_206                         | No  |
| 871<br>82  | 92487  | 677   | 91810  | 3<br>8 | M | 25.02               | Cont<br>rol | run_205                         | No  |
| 895<br>72  | 119654 | 392   | 119262 | 2<br>3 | M | 22.98<br>5          | Cont<br>rol | run_208                         | No  |
| 911<br>83  | 93994  | 677   | 93317  | 4<br>9 | M | 23.24<br>59847<br>8 | Cont<br>rol | run_205                         | No  |
| 938<br>65  | 65486  | 1323  | 64163  | 7<br>3 | M | 23.73<br>9          | T2D<br>M    | run_205                         | No  |
| 945<br>95  | 6969   | 50    | 6919   | 7<br>7 | M | 21.17<br>73297<br>1 | Cont<br>rol | run_203,run<br>_207             | Yes |
| 954<br>92  | 114469 | 2218  | 112251 | 6<br>8 | M | 28.48               | T2D<br>M    | run_201                         | No  |
| 100<br>612 | 109120 | 401   | 108719 | 6<br>7 | M | 23.85               | T2D<br>M    | run_208                         | No  |
| 108<br>175 | 169251 | 512   | 168739 | 3<br>5 | F | 38.40<br>8          | Cont<br>rol | run_200,run<br>_204             | Yes |

|            |        |      |        |        |   |                     |             |                     |     |
|------------|--------|------|--------|--------|---|---------------------|-------------|---------------------|-----|
| 108<br>945 | 166642 | 707  | 165935 | 8<br>6 | F | 27.77<br>22674<br>1 | T2D<br>M    | run_202,run<br>_204 | Yes |
| 111<br>473 | 326669 | 1333 | 325336 | 3<br>7 | M | 33.25<br>2          | Cont<br>rol | run_206             | No  |
| 113<br>950 | 162042 | 4088 | 157954 | 3<br>7 | M | 23.64<br>75834<br>4 | Cont<br>rol | run_201             | No  |
| 117<br>130 | 98611  | 732  | 97879  | 3<br>1 | F | 17.92<br>6          | Cont<br>rol | run_205             | No  |
| 117<br>402 | 219986 | 692  | 219294 | 6<br>6 | M | 31.39<br>17233<br>6 | T2D<br>M    | run_202,run<br>_204 | Yes |
| 118<br>721 | 264525 | 995  | 263530 | 6<br>2 | F | 25.39               | T2D<br>M    | run_206             | No  |
| 121<br>860 | 88961  | 3653 | 85308  | 4<br>2 | M | 17.75<br>11447<br>8 | Cont<br>rol | run_201             | No  |
| 122<br>185 | 183541 | 613  | 182928 | 3<br>3 | M | 23.12<br>4          | Cont<br>rol | run_206             | No  |
| 124<br>387 | 95015  | 445  | 94570  | 6<br>0 | F | 35.61<br>12802<br>4 | T2D<br>M    | run_200             | No  |
| 124<br>812 | 155684 | 686  | 154998 | 8<br>3 | F | 27.11<br>11111<br>1 | T2D<br>M    | run_207             | No  |
| 137<br>654 | 43722  | 87   | 43635  | 7<br>7 | M | 19.39<br>64620<br>2 | T2D<br>M    | run_202             | No  |
| 139<br>215 | 219590 | 663  | 218927 | 2<br>8 | M | 22.19<br>6          | Cont<br>rol | run_206             | No  |
| 140<br>738 | 117900 | 468  | 117432 | 5<br>4 | F | 43.91<br>65889<br>1 | Cont<br>rol | run_203,run<br>_207 | Yes |
| 144<br>829 | 287339 | 1030 | 286309 | 6<br>6 | F | 34.33<br>92299<br>7 | T2D<br>M    | run_202,run<br>_204 | Yes |
| 145<br>108 | 228389 | 2309 | 226080 | 4<br>7 | F | 21.39<br>54326<br>4 | Cont<br>rol | run_201             | No  |
| 145<br>501 | 53614  | 183  | 53431  | 6<br>1 | F | 29.4                | T2D<br>M    | run_200             | No  |

|                 |        |            |        |        |   |                     |             |                                 |     |
|-----------------|--------|------------|--------|--------|---|---------------------|-------------|---------------------------------|-----|
| 153<br>133      | 69141  | 288        | 68853  | 7<br>1 | F | 38.44<br>67512<br>5 | Cont<br>rol | run_200                         | No  |
| 160<br>518      | 200411 | 742        | 199669 | 6<br>7 | M | 23.58<br>8          | T2D<br>M    | run_206                         | No  |
| 167<br>490      | 32563  | 102        | 32461  | 9<br>4 | M | 27.27<br>63340<br>6 | Cont<br>rol | run_202                         | No  |
| 167<br>941      | 43018  | 206        | 42812  | 2<br>4 | M | 22.72<br>04383<br>7 | T2D<br>M    | run_200                         | No  |
| 174<br>307      | 103437 | 420        | 103017 | 6<br>9 | F | 40.44<br>44444<br>4 | T2D<br>M    | run_207,run<br>_208             | Yes |
| 177<br>949      | 46857  | 12277      | 34580  | 5<br>9 | F | 24.4                | T2D<br>M    | run_203                         | No  |
| 179<br>104      | 306186 | 1341       | 304845 | 6<br>6 | M | 30.73<br>94166<br>2 | Cont<br>rol | run_200,run<br>_207,run_20<br>8 | Yes |
| 179<br>257      | 239788 | 891        | 238897 | 3<br>4 | F | 29.56<br>5          | Cont<br>rol | run_206                         | No  |
| 181<br>640      | 28879  | 183        | 28696  | 2<br>3 | F | 28.51<br>6          | Cont<br>rol | run_207                         | No  |
| 189<br>102      | 170913 | 96860      | 74053  | 3<br>6 | F | 24.72<br>2          | Cont<br>rol | run_205                         | No  |
| 189<br>935      | 89265  | 253        | 89012  | 5<br>6 | F | 29.6                | T2D<br>M    | run_208                         | No  |
| 191<br>943      | 843472 | 71492<br>9 | 128543 | 3<br>2 | F | 32.34<br>3          | Cont<br>rol | run_201                         | No  |
| 192<br>695      | 133856 | 1094       | 132762 | 5<br>9 | F | 31.01<br>14315<br>1 | T2D<br>M    | run_201                         | No  |
| 194<br>044      | 31390  | 2589       | 28801  | 5<br>4 | F | 25.6                | Cont<br>rol | run_207                         | No  |
| 194<br>086      | 97774  | 1945       | 95829  | 3<br>0 | M | 23.66<br>5          | Cont<br>rol | run_205                         | No  |
| 195<br>873      | 122820 | 2014       | 120806 | 5<br>2 | M | 32                  | Cont<br>rol | run_208                         | No  |
| 196<br>004      | 234748 | 700        | 234048 | 5<br>0 | F | 28.3                | Cont<br>rol | run_202,run<br>_204             | Yes |
| 125<br>140<br>0 | 209153 | 777        | 208376 | 3<br>1 | M | 19.44<br>6          | Cont<br>rol | run_206                         | No  |

**Supplemental Table 2.** Full results of linear regression analyses of UHGC species abundances (log-transformed) vs. Study group adjusted by age and re-sequencing status

| feature                                           | pv<br>alu<br>e              | est<br>im<br>ate                  | fdr                         | d                           | p                               | c                         | o                           | f                            | g                       | s                                        |
|---------------------------------------------------|-----------------------------|-----------------------------------|-----------------------------|-----------------------------|---------------------------------|---------------------------|-----------------------------|------------------------------|-------------------------|------------------------------------------|
| MGYG-HGUT-00002:s__Blautia_A sp900066165          | 0.7<br>14<br>47<br>39<br>39 | 0.1<br>01<br>90<br>05<br>76       | 0.9<br>79<br>45<br>84<br>75 | d_<br>_B<br>act<br>eri<br>a | p__Fi<br>rmicu<br>tes_A         | c__Clo<br>stridia         | o__Lac<br>hnospi<br>rales   | f__Lach<br>nospira<br>cae    | g__Blautia<br>_A        | s__Blautia_A<br>sp900066165              |
| MGYG-HGUT-00003:s__Alistipes shahii               | 0.2<br>40<br>93<br>36<br>43 | 0.3<br>22<br>31<br>07<br>95       | 0.9<br>02<br>18<br>13<br>67 | d_<br>_B<br>act<br>eri<br>a | p__B<br>acter<br>oidot<br>a     | c__Ba<br>cteroi<br>dia    | o__Bac<br>teroida<br>les    | f__Rike<br>nellacea<br>e     | g__Alistipe<br>s        | s__Alistipes<br>shahii                   |
| MGYG-HGUT-00004:s__Anaerotruncus colihominis      | 0.4<br>36<br>29<br>62<br>55 | -<br>0.2<br>08<br>83<br>87<br>18  | 0.9<br>50<br>80<br>65<br>94 | d_<br>_B<br>act<br>eri<br>a | p__Fi<br>rmicu<br>tes_A         | c__Clo<br>stridia         | o__Os<br>cillospi<br>rales  | f__Rumi<br>nococca<br>cae    | g__Anaero<br>truncus    | s__Anaerotru<br>ncus<br>colihominis      |
| MGYG-HGUT-00013:s__Bacteroides unknown_1          | 0.5<br>82<br>58<br>59<br>42 | -<br>0.1<br>53<br>56<br>77<br>94  | 0.9<br>75<br>67<br>17<br>57 | d_<br>_B<br>act<br>eri<br>a | p__B<br>acter<br>oidot<br>a     | c__Ba<br>cteroi<br>dia    | o__Bac<br>teroida<br>les    | f__Bact<br>eroidac<br>cae    | g__Bacter<br>oides      | s__Bacteroides<br>unknown_1              |
| MGYG-HGUT-00016:s__Anaerotignum sp001304995       | 0.5<br>57<br>50<br>18<br>78 | 0.1<br>63<br>48<br>61<br>03<br>73 | 0.9<br>68<br>53<br>20<br>73 | d_<br>_B<br>act<br>eri<br>a | p__Fi<br>rmicu<br>tes_A         | c__Clo<br>stridia         | o__Lac<br>hnospi<br>rales   | f__Anae<br>rotignac<br>cae   | g__Anaero<br>tignum     | s__Anaerotig<br>num<br>sp001304995       |
| MGYG-HGUT-00017:s__Collinsella unknown_1          | 0.2<br>67<br>95<br>55<br>64 | 0.3<br>07<br>79<br>88<br>66       | 0.9<br>20<br>49<br>41<br>92 | d_<br>_B<br>act<br>eri<br>a | p__A<br>ctino<br>bacte<br>riota | c__Co<br>riobac<br>teriia | o__Cor<br>iobact<br>eriales | f__Cori<br>obacteri<br>aceae | g__Collins<br>ella      | s__Collinsella<br>unknown_1              |
| MGYG-HGUT-00018:s__Coproccoccus eutactus          | 0.1<br>88<br>25<br>69<br>58 | 0.3<br>60<br>44<br>99<br>89       | 0.8<br>91<br>82<br>55<br>59 | d_<br>_B<br>act<br>eri<br>a | p__Fi<br>rmicu<br>tes_A         | c__Clo<br>stridia         | o__Lac<br>hnospi<br>rales   | f__Lach<br>nospira<br>cae    | g__Coprocc<br>occus     | s__Coproccoc<br>cus eutactus             |
| MGYG-HGUT-00022:s__Faecalibacterium prausnitzii_C | 0.4<br>93<br>94<br>65<br>7  | 0.1<br>88<br>74<br>56<br>91       | 0.9<br>68<br>53<br>20<br>73 | d_<br>_B<br>act<br>eri<br>a | p__Fi<br>rmicu<br>tes_A         | c__Clo<br>stridia         | o__Os<br>cillospi<br>rales  | f__Rumi<br>nococca<br>cae    | g__Faecali<br>bacterium | s__Faecalibac<br>terium<br>prausnitzii_C |

|                                                |                             |                                  |                             |                             |                             |                          |                                   |                                          |                        |                                       |
|------------------------------------------------|-----------------------------|----------------------------------|-----------------------------|-----------------------------|-----------------------------|--------------------------|-----------------------------------|------------------------------------------|------------------------|---------------------------------------|
| MGYG-HGUT-00023:s__Streptococcus parasanguinis | 0.0<br>34<br>93<br>98<br>48 | 0.5<br>77<br>92<br>52<br>5       | 0.7<br>68<br>22<br>58<br>34 | d_<br>_B<br>act<br>eri<br>a | p__Fi<br>rmicu<br>tes       | c__Ba<br>cilli           | o__Lac<br>tobacill<br>ales        | f__Stre<br>ptococc<br>aceae              | g__Strepto<br>coccus   | s__Streptococ<br>cus<br>parasanguinis |
| MGYG-HGUT-00026:s__Catenibacterium mitsuokai   | 0.8<br>56<br>52<br>65<br>23 | 0.0<br>50<br>27<br>23<br>28      | 0.9<br>92<br>87<br>80<br>88 | d_<br>_B<br>act<br>eri<br>a | p__Fi<br>rmicu<br>tes       | c__Ba<br>cilli           | o__Ery<br>sipelot<br>richale<br>s | f__Erysi<br>pelatocl<br>ostridia<br>ceae | g__Cateni<br>bacterium | s__Catenibact<br>erium<br>mitsuokai   |
| MGYG-HGUT-00027:s__Mitsuoella jalaludinii      | 0.9<br>94<br>91<br>98<br>91 | 0.0<br>01<br>78<br>92<br>21      | 0.9<br>98<br>80<br>33<br>46 | d_<br>_B<br>act<br>eri<br>a | p__Fi<br>rmicu<br>tes_C     | c__Ne<br>gativic<br>utes | o__Sel<br>enomo<br>nadale<br>s    | f__Sele<br>nomona<br>daceae              | g__Mitsuo<br>kella     | s__Mitsuokell<br>a jalaludinii        |
| MGYG-HGUT-00028:s__Anaerostipes hadrus_A       | 0.4<br>18<br>45<br>63<br>96 | -<br>0.2<br>26<br>33<br>24<br>63 | 0.9<br>39<br>70<br>92<br>5  | d_<br>_B<br>act<br>eri<br>a | p__Fi<br>rmicu<br>tes_A     | c__Clo<br>stridia        | o__Lac<br>hnospi<br>rales         | f__Lach<br>nospirac<br>eae               | g__Anaero<br>stipes    | s__Anaerosti<br>pes hadrus_A          |
| MGYG-HGUT-00029:s__Bacteroides finegoldii      | 0.3<br>73<br>22<br>57<br>49 | -<br>0.2<br>49<br>18<br>57<br>49 | 0.9<br>39<br>70<br>92<br>5  | d_<br>_B<br>act<br>eri<br>a | p__B<br>acter<br>oidot<br>a | c__Ba<br>cteroi<br>dia   | o__Bac<br>teroida<br>les          | f__Bact<br>eroidac<br>eae                | g__Bacter<br>oides     | s__Bacteroides<br>finegoldii          |
| MGYG-HGUT-00030:s__CAG-603 sp900066105         | 0.0<br>15<br>56<br>64<br>42 | 0.6<br>36<br>45<br>74<br>89      | 0.7<br>68<br>22<br>58<br>34 | d_<br>_B<br>act<br>eri<br>a | p__Fi<br>rmicu<br>tes_A     | c__Clo<br>stridia        | o__Lac<br>hnospi<br>rales         | f__Lach<br>nospirac<br>eae               | g__CAG-<br>603         | s__CAG-603<br>sp900066105             |
| MGYG-HGUT-00031:s__Blautia_A sp900066205       | 0.1<br>92<br>40<br>57<br>52 | 0.3<br>61<br>23<br>6<br>59       | 0.8<br>91<br>82<br>55<br>59 | d_<br>_B<br>act<br>eri<br>a | p__Fi<br>rmicu<br>tes_A     | c__Clo<br>stridia        | o__Lac<br>hnospi<br>rales         | f__Lach<br>nospirac<br>eae               | g__Blautia<br>_A       | s__Blautia_A<br>sp900066205           |
| MGYG-HGUT-00032:s__Hungatella effluvii         | 0.0<br>91<br>75<br>93<br>2  | -<br>0.4<br>63<br>85<br>64<br>13 | 0.8<br>83<br>30<br>72<br>56 | d_<br>_B<br>act<br>eri<br>a | p__Fi<br>rmicu<br>tes_A     | c__Clo<br>stridia        | o__Lac<br>hnospi<br>rales         | f__Lach<br>nospirac<br>eae               | g__Hungat<br>ella      | s__Hungatella<br>effluvii             |
| MGYG-HGUT-00033:s__CAG-41 sp900066215          | 0.3<br>26<br>51<br>98<br>88 | -<br>0.2<br>74<br>25<br>92       | 0.9<br>30<br>62<br>46<br>92 | d_<br>_B<br>act<br>eri<br>a | p__Fi<br>rmicu<br>tes_A     | c__Clo<br>stridia        | o__Mo<br>noglob<br>ales           | f__UBA<br>1381                           | g__CAG-<br>41          | s__CAG-41<br>sp900066215              |



|                                                   |                             |                                  |                             |                             |                             |                        |                                     |                               |                          |                                          |
|---------------------------------------------------|-----------------------------|----------------------------------|-----------------------------|-----------------------------|-----------------------------|------------------------|-------------------------------------|-------------------------------|--------------------------|------------------------------------------|
|                                                   |                             | 21<br>36                         |                             |                             |                             |                        |                                     |                               |                          |                                          |
| MGYG-HGUT-00034:s__Massilimalia timonensis        | 0.8<br>26<br>52<br>15<br>99 | -<br>0.0<br>59<br>17<br>88<br>42 | 0.9<br>91<br>93<br>69<br>36 | d_<br>_B<br>act<br>eri<br>a | p__Fi<br>rmicu<br>tes_A     | c__Clo<br>stridia      | o__Os<br>cillospi<br>rales          | f__Rumi<br>nococca<br>ceae    | g__Massili<br>maliae     | s__Massilimal<br>iae<br>timonensis       |
| MGYG-HGUT-00035:s__Blautia_A hydrogenotrophica    | 0.8<br>50<br>45<br>96<br>09 | 0.0<br>53<br>00<br>73<br>75      | 0.9<br>92<br>87<br>80<br>88 | d_<br>_B<br>act<br>eri<br>a | p__Fi<br>rmicu<br>tes_A     | c__Clo<br>stridia      | o__Lac<br>hnospi<br>rales           | f__Lach<br>nospi<br>rales     | g__Blautia<br>_A         | s__Blautia_A<br>hydrogenotro<br>phica    |
| MGYG-HGUT-00036:s__GCA-900066995 sp900291955      | 0.0<br>15<br>52<br>72<br>53 | 0.6<br>41<br>31<br>71<br>23      | 0.7<br>68<br>22<br>58<br>34 | d_<br>_B<br>act<br>eri<br>a | p__Fi<br>rmicu<br>tes_A     | c__Clo<br>stridia      | o__Os<br>cillospi<br>rales          | f__Acut<br>alibacte<br>raceae | g__GCA-<br>90006699<br>5 | s__GCA-<br>900066995<br>sp900291955      |
| MGYG-HGUT-00037:s__Turicibacter sp001543345       | 0.8<br>09<br>32<br>57<br>1  | 0.0<br>66<br>40<br>53<br>96      | 0.9<br>87<br>14<br>23<br>02 | d_<br>_B<br>act<br>eri<br>a | p__Fi<br>rmicu<br>tes       | c__Ba<br>cilli         | o__Hal<br>oplasm<br>atales          | f__Turic<br>ibactera<br>ceae  | g__Turicib<br>acter      | s__Turicibact<br>er<br>sp001543345       |
| MGYG-HGUT-00038:s__Dorea longicatena              | 0.5<br>27<br>25<br>55<br>92 | 0.1<br>71<br>46<br>97<br>13      | 0.9<br>68<br>53<br>20<br>73 | d_<br>_B<br>act<br>eri<br>a | p__Fi<br>rmicu<br>tes_A     | c__Clo<br>stridia      | o__Lac<br>hnospi<br>rales           | f__Lach<br>nospi<br>rales     | g__Dorea                 | s__Dorea<br>longicatena                  |
| MGYG-HGUT-00039:s__Faecalibacterium prausnitzii_H | 0.0<br>53<br>03<br>72<br>62 | 0.5<br>37<br>71<br>67<br>58      | 0.8<br>57<br>21<br>13<br>2  | d_<br>_B<br>act<br>eri<br>a | p__Fi<br>rmicu<br>tes_A     | c__Clo<br>stridia      | o__Os<br>cillospi<br>rales          | f__Rumi<br>nococca<br>ceae    | g__Faecali<br>bacterium  | s__Faecalibac<br>terium<br>prausnitzii_H |
| MGYG-HGUT-00040:s__UBA1191 sp900066305            | 0.8<br>41<br>34<br>10<br>57 | -<br>0.0<br>55<br>60<br>75<br>17 | 0.9<br>92<br>87<br>80<br>88 | d_<br>_B<br>act<br>eri<br>a | p__Fi<br>rmicu<br>tes_A     | c__Clo<br>stridia      | o__Pe<br>ptostre<br>ptococ<br>cales | f__Anae<br>rororac<br>aceae   | g__UBA11<br>91           | s__UBA1191<br>sp900066305                |
| MGYG-HGUT-00041:s__Acetatifa ctor sp900066365     | 0.0<br>88<br>41<br>97<br>96 | 0.4<br>63<br>47<br>69<br>33      | 0.8<br>82<br>71<br>60<br>64 | d_<br>_B<br>act<br>eri<br>a | p__Fi<br>rmicu<br>tes_A     | c__Clo<br>stridia      | o__Lac<br>hnospi<br>rales           | f__Lach<br>nospi<br>rales     | g__Acetati<br>factor     | s__Acetatifa<br>ctor<br>sp900066365      |
| MGYG-HGUT-00042:s__Bacteroides_A sp900066445      | 0.2<br>27<br>36             | 0.3<br>36<br>03                  | 0.9<br>00<br>89             | d_<br>_B<br>act             | p__B<br>acter<br>oidot<br>a | c__Ba<br>cteroi<br>dia | o__Bac<br>teroida<br>les            | f__Bact<br>eroidac<br>eae     | g__Bacter<br>oides_A     | s__Bacteroides<br>_A<br>sp900066445      |

|                                                       |                             |                                  |                             |                             |                             |                        |                                   |                                          |                                   |                                          |
|-------------------------------------------------------|-----------------------------|----------------------------------|-----------------------------|-----------------------------|-----------------------------|------------------------|-----------------------------------|------------------------------------------|-----------------------------------|------------------------------------------|
|                                                       | 53<br>8                     | 06<br>99                         | 12<br>04                    | eri<br>a                    |                             |                        |                                   |                                          |                                   |                                          |
| MGYG-HGUT-00043:s__Bacteroides_A sp900066455          | 0.3<br>66<br>79<br>69<br>23 | 0.2<br>49<br>62<br>38<br>61      | 0.9<br>39<br>70<br>92<br>5  | d_<br>_B<br>act<br>eri<br>a | p__B<br>acter<br>oidot<br>a | c__Ba<br>cteroi<br>dia | o__Bac<br>teroida<br>les          | f__Bact<br>eroidac<br>eae                | g__Bacter<br>oides_A              | s__Bacteroides_A<br>sp900066455          |
| MGYG-HGUT-00044:s__Parabacteroides merdae             | 0.1<br>71<br>11<br>57<br>1  | -<br>0.3<br>81<br>01<br>17<br>65 | 0.8<br>91<br>82<br>55<br>59 | d_<br>_B<br>act<br>eri<br>a | p__B<br>acter<br>oidot<br>a | c__Ba<br>cteroi<br>dia | o__Bac<br>teroida<br>les          | f__Tann<br>erellace<br>ae                | g__Paraba<br>cteroides            | s__Parabacteroides<br>merdae             |
| MGYG-HGUT-00045:s__Erysipelatoclostridium sp000752095 | 0.4<br>44<br>02<br>93<br>65 | 0.2<br>13<br>82<br>90<br>23      | 0.9<br>60<br>63<br>01<br>16 | d_<br>_B<br>act<br>eri<br>a | p__Fi<br>rmicu<br>tes       | c__Ba<br>cilli         | o__Ery<br>sipelot<br>richale<br>s | f__Erysi<br>pelatocl<br>ostridia<br>ceae | g__Erysipe<br>latoclostri<br>dium | s__Erysipelatoclostridium<br>sp000752095 |
| MGYG-HGUT-00050:s__Blautia_A sp900066505              | 0.9<br>86<br>63<br>64<br>78 | 0.0<br>04<br>63<br>49<br>53      | 0.9<br>98<br>80<br>33<br>46 | d_<br>_B<br>act<br>eri<br>a | p__Fi<br>rmicu<br>tes_A     | c__Clo<br>stridia      | o__Lac<br>hnospi<br>rales         | f__Lach<br>nospirac<br>eae               | g__Blautia<br>_A                  | s__Blautia_A<br>sp900066505              |
| MGYG-HGUT-00051:s__GCA-900066575 sp900066385          | 0.1<br>31<br>33<br>23<br>46 | 0.4<br>14<br>86<br>79<br>25      | 0.8<br>91<br>82<br>55<br>59 | d_<br>_B<br>act<br>eri<br>a | p__Fi<br>rmicu<br>tes_A     | c__Clo<br>stridia      | o__Lac<br>hnospi<br>rales         | f__Lach<br>nospirac<br>eae               | g__GCA-<br>90006657<br>5          | s__GCA-<br>900066575<br>sp900066385      |
| MGYG-HGUT-00052:s__Anaerostipes sp000508985           | 0.4<br>01<br>07<br>23<br>07 | -<br>0.2<br>31<br>19<br>56<br>21 | 0.9<br>39<br>70<br>92<br>5  | d_<br>_B<br>act<br>eri<br>a | p__Fi<br>rmicu<br>tes_A     | c__Clo<br>stridia      | o__Lac<br>hnospi<br>rales         | f__Lach<br>nospirac<br>eae               | g__Anaero<br>stipes               | s__Anaerostipes<br>sp000508985           |
| MGYG-HGUT-00054:s__Bacteroides acidifaciens           | 0.1<br>92<br>89<br>43<br>34 | -<br>0.3<br>58<br>01<br>73<br>49 | 0.8<br>91<br>82<br>55<br>59 | d_<br>_B<br>act<br>eri<br>a | p__B<br>acter<br>oidot<br>a | c__Ba<br>cteroi<br>dia | o__Bac<br>teroida<br>les          | f__Bact<br>eroidac<br>eae                | g__Bacter<br>oides                | s__Bacteroides<br>acidifaciens           |
| MGYG-HGUT-00056:s__Muribaculum sp002358615            | 0.0<br>80<br>89<br>16<br>82 | -<br>0.4<br>82<br>56<br>46<br>32 | 0.8<br>77<br>82<br>62<br>47 | d_<br>_B<br>act<br>eri<br>a | p__B<br>acter<br>oidot<br>a | c__Ba<br>cteroi<br>dia | o__Bac<br>teroida<br>les          | f__Muri<br>baculac<br>eae                | g__Muriba<br>culum                | s__Muribaculum<br>sp002358615            |

|                                               |             |               |             |                  |                   |                   |                         |                          |                    |                               |
|-----------------------------------------------|-------------|---------------|-------------|------------------|-------------------|-------------------|-------------------------|--------------------------|--------------------|-------------------------------|
| MGYG-HGUT-00057:s__Bacteroides sp002491635    | 0.587081116 | -0.1523711    | 0.975671757 | d__Bacteroidetes | p__Bacteroidetes  | c__Bacteroidia    | o__Bacteroidales        | f__Bacteroidaceae        | g__Bacteroides     | s__Bacteroides sp002491635    |
| MGYG-HGUT-00058:s__Eubacterium_I sp900066595  | 0.786421184 | 0.07580324786 | 0.982064749 | d__Bacteroidetes | p__Firmicutes     | c__Clostridia     | o__Lachnospirales       | f__Lachnospiraceae       | g__Eubacterium_I   | s__Eubacterium_I sp900066595  |
| MGYG-HGUT-00059:s__Lawsonibacter sp900066645  | 0.326069242 | 0.274680524   | 0.930624692 | d__Bacteroidetes | p__Firmicutes     | c__Clostridia     | o__Oscillospirales      | f__Oscillospiraceae      | g__Lawsonibacter   | s__Lawsonibacter sp900066645  |
| MGYG-HGUT-00060:s__Lachnospira eligens_B      | 0.405853181 | 0.229554483   | 0.93970925  | d__Bacteroidetes | p__Firmicutes     | c__Clostridia     | o__Lachnospirales       | f__Lachnospiraceae       | g__Lachnospira     | s__Lachnospira eligens_B      |
| MGYG-HGUT-00061:s__Collinsella aerofaciens_E  | 0.103247626 | 0.446432859   | 0.883307256 | d__Bacteroidetes | p__Actinobacteria | c__Coriobacteriia | o__Coriobacteriales     | f__Coriobacteriaceae     | g__Collinsella     | s__Collinsella aerofaciens_E  |
| MGYG-HGUT-00062:s__Intestinibacter bartlettii | 0.54087896  | -0.171768797  | 0.968532073 | d__Bacteroidetes | p__Firmicutes     | c__Clostridia     | o__Peptostreptococcales | f__Peptostreptococcaceae | g__Intestinibacter | s__Intestinibacter bartlettii |
| MGYG-HGUT-00063:s__Emergencia sp900066695     | 0.035442039 | 0.583141863   | 0.768225834 | d__Bacteroidetes | p__Firmicutes     | c__Clostridia     | o__Peptostreptococcales | f__Anaerovoracaceae      | g__Emergencia      | s__Emergencia sp900066695     |
| MGYG-HGUT-00064:s__Clostridium baratii        | 0.014605095 | -0.669295483  | 0.768225834 | d__Bacteroidetes | p__Firmicutes     | c__Clostridia     | o__Clostridiales        | f__Clostridiaceae        | g__Clostridium     | s__Clostridium baratii        |
| MGYG-HGUT-00065:s__Anaerostipes sp900066705   | 0.797283661 | -0.071490527  | 0.984620527 | d__Bacteroidetes | p__Firmicutes     | c__Clostridia     | o__Lachnospirales       | f__Lachnospiraceae       | g__Anaerostipes    | s__Anaerostipes sp900066705   |

|                                                      |                             |                                         |                             |                             |                             |                        |                                   |                                |                                 |                                          |
|------------------------------------------------------|-----------------------------|-----------------------------------------|-----------------------------|-----------------------------|-----------------------------|------------------------|-----------------------------------|--------------------------------|---------------------------------|------------------------------------------|
|                                                      |                             | 39<br>46                                |                             |                             |                             |                        |                                   |                                |                                 |                                          |
| MGYG-HGUT-00066:s__GCA-900066755<br>sp900066755      | 0.7<br>88<br>68<br>00<br>34 | 0.0<br>75<br>29<br>09<br>56             | 0.9<br>82<br>82<br>51<br>19 | d_<br>_B<br>act<br>eri<br>a | p__Fi<br>rmicu<br>tes_A     | c__Clo<br>stridia      | o__Lac<br>hnospi<br>rales         | f__Lach<br>nospi<br>rac<br>eae | g__GCA-<br>90006675<br>5        | s__GCA-<br>900066755<br>sp900066755      |
| MGYG-HGUT-00067:s__Dorea<br>sp900066765              | 0.0<br>51<br>61<br>00<br>74 | 0.5<br>31<br>35<br>21<br>76<br>13<br>79 | 0.8<br>57<br>21<br>13<br>2  | d_<br>_B<br>act<br>eri<br>a | p__Fi<br>rmicu<br>tes_A     | c__Clo<br>stridia      | o__Lac<br>hnospi<br>rales         | f__Lach<br>nospi<br>rac<br>eae | g__Dorea                        | s__Dorea<br>sp900066765                  |
| MGYG-HGUT-00068:s__Agathobaculum<br>sp900291975      | 0.0<br>74<br>78<br>94<br>49 | 0.4<br>79<br>91<br>34<br>78             | 0.8<br>77<br>82<br>62<br>47 | d_<br>_B<br>act<br>eri<br>a | p__Fi<br>rmicu<br>tes_A     | c__Clo<br>stridia      | o__Os<br>cillospi<br>rales        | f__Buty<br>ricicocc<br>aceae   | g__Agatho<br>baculum            | s__Agathobac<br>ulum<br>sp900291975      |
| MGYG-HGUT-00069:s__Clostridium_A leptum              | 0.0<br>97<br>11<br>40<br>67 | 0.4<br>50<br>54<br>19<br>23             | 0.8<br>83<br>30<br>72<br>56 | d_<br>_B<br>act<br>eri<br>a | p__Fi<br>rmicu<br>tes_A     | c__Clo<br>stridia      | o__Os<br>cillospi<br>rales        | f__Acut<br>alibacte<br>raceae  | g__Clostri<br>dium_A            | s__Clostridiu<br>m_A leptum              |
| MGYG-HGUT-00070:s__Lawsonibacter<br>sp900066825      | 0.9<br>27<br>59<br>50<br>47 | -<br>0.0<br>23<br>87<br>90<br>95        | 0.9<br>94<br>47<br>94<br>74 | d_<br>_B<br>act<br>eri<br>a | p__Fi<br>rmicu<br>tes_A     | c__Clo<br>stridia      | o__Os<br>cillospi<br>rales        | f__Oscil<br>lospirac<br>eae    | g__Lawson<br>ibacter            | s__Lawsoniba<br>cter<br>sp900066825      |
| MGYG-HGUT-00071:s__Pseudoflavonifactor<br>capillosus | 0.7<br>88<br>41<br>26<br>75 | 0.0<br>72<br>09<br>03<br>43             | 0.9<br>82<br>82<br>51<br>19 | d_<br>_B<br>act<br>eri<br>a | p__Fi<br>rmicu<br>tes_A     | c__Clo<br>stridia      | o__Os<br>cillospi<br>rales        | f__Oscil<br>lospirac<br>eae    | g__Pseudo<br>flavonifrac<br>tor | s__Pseudofla<br>vonifactor<br>capillosus |
| MGYG-HGUT-00073:s__GCA-900066905<br>sp900066905      | 0.4<br>35<br>95<br>78<br>63 | 0.2<br>14<br>41<br>41<br>38             | 0.9<br>50<br>80<br>65<br>94 | d_<br>_B<br>act<br>eri<br>a | p__Fi<br>rmicu<br>tes_A     | c__Clo<br>stridia      | o__Chr<br>istense<br>nellale<br>s | f__GCA-<br>900066<br>905       | g__GCA-<br>90006690<br>5        | s__GCA-<br>900066905<br>sp900066905      |
| MGYG-HGUT-00074:s__Alistipes<br>onderdonkii          | 0.8<br>77<br>42<br>41<br>54 | -<br>0.0<br>42<br>08<br>57<br>24        | 0.9<br>94<br>47<br>94<br>74 | d_<br>_B<br>act<br>eri<br>a | p__B<br>acter<br>oidot<br>a | c__Ba<br>cteroi<br>dia | o__Bac<br>teroida<br>les          | f__Rike<br>nellacea<br>e       | g__Aliste<br>pes                | s__Alistipes<br>onderdonkii              |
| MGYG-HGUT-00076:s__Roseburia<br>intestinalis         | 0.3<br>48<br>50             | 0.2<br>57<br>24                         | 0.9<br>39<br>70             | d_<br>_B<br>act             | p__Fi<br>rmicu<br>tes_A     | c__Clo<br>stridia      | o__Lac<br>hnospi<br>rales         | f__Lach<br>nospi<br>rac<br>eae | g__Rosebu<br>ria                | s__Roseburia<br>intestinalis             |

|                                              |                             |                                  |                             |                             |                         |                   |                            |                             |                      |                                   |
|----------------------------------------------|-----------------------------|----------------------------------|-----------------------------|-----------------------------|-------------------------|-------------------|----------------------------|-----------------------------|----------------------|-----------------------------------|
|                                              | 79<br>06                    | 65<br>85                         | 92<br>5                     | eri<br>a                    |                         |                   |                            |                             |                      |                                   |
| MGYG-HGUT-00077:s__Eubacterium_E hallii_A    | 0.5<br>11<br>89<br>12<br>21 | 0.1<br>82<br>64<br>64<br>89      | 0.9<br>68<br>53<br>20<br>73 | d_<br>_B<br>act<br>eri<br>a | p__Fi<br>rmicu<br>tes_A | c__Clo<br>stridia | o__Lac<br>hnoSpi<br>rales  | f__Lach<br>nospira<br>ceae  | g__Eubact<br>erium_E | s__Eubacteriu<br>m_E hallii_A     |
| MGYG-HGUT-00078:s__Lachnospira rogosae       | 0.0<br>87<br>70<br>17<br>33 | 0.4<br>50<br>94<br>18<br>89      | 0.8<br>82<br>71<br>60<br>64 | d_<br>_B<br>act<br>eri<br>a | p__Fi<br>rmicu<br>tes_A | c__Clo<br>stridia | o__Lac<br>hnoSpi<br>rales  | f__Lach<br>nospira<br>ceae  | g__Lachno<br>spira   | s__Lachnospir<br>a rogosae        |
| MGYG-HGUT-00080:s__Anaerostipes caccae       | 0.2<br>41<br>66<br>31<br>19 | -<br>0.3<br>19<br>85<br>67<br>95 | 0.9<br>02<br>18<br>13<br>67 | d_<br>_B<br>act<br>eri<br>a | p__Fi<br>rmicu<br>tes_A | c__Clo<br>stridia | o__Lac<br>hnoSpi<br>rales  | f__Lach<br>nospira<br>ceae  | g__Anaero<br>stipes  | s__Anaerosti<br>pes caccae        |
| MGYG-HGUT-00084:s__Gemmiger formicilis       | 0.0<br>24<br>61<br>79<br>55 | 0.6<br>14<br>52<br>14<br>9       | 0.7<br>68<br>22<br>58<br>34 | d_<br>_B<br>act<br>eri<br>a | p__Fi<br>rmicu<br>tes_A | c__Clo<br>stridia | o__Os<br>cillospi<br>rales | f__Rumi<br>nococca<br>ceae  | g__Gemmi<br>ger      | s__Gemmiger<br>formicilis         |
| MGYG-HGUT-00086:s__Lawsonibacter unknown_1   | 0.9<br>68<br>91<br>17<br>63 | 0.0<br>10<br>91<br>45<br>89      | 0.9<br>94<br>47<br>94<br>74 | d_<br>_B<br>act<br>eri<br>a | p__Fi<br>rmicu<br>tes_A | c__Clo<br>stridia | o__Os<br>cillospi<br>rales | f__Oscil<br>lospirac<br>eae | g__Lawson<br>ibacter | s__Lawsoniba<br>cter<br>unknown_1 |
| MGYG-HGUT-00087:s__CAG-81 sp000435795        | 0.2<br>05<br>63<br>50<br>88 | 0.3<br>51<br>96<br>64<br>62      | 0.8<br>91<br>82<br>55<br>59 | d_<br>_B<br>act<br>eri<br>a | p__Fi<br>rmicu<br>tes_A | c__Clo<br>stridia | o__Lac<br>hnoSpi<br>rales  | f__Lach<br>nospira<br>ceae  | g__CAG-<br>81        | s__CAG-81<br>sp000435795          |
| MGYG-HGUT-00088:s__Streptococcus lutetiensis | 0.7<br>25<br>16<br>72<br>59 | -<br>0.0<br>92<br>94<br>84<br>75 | 0.9<br>79<br>45<br>84<br>75 | d_<br>_B<br>act<br>eri<br>a | p__Fi<br>rmicu<br>tes   | c__Ba<br>cilli    | o__Lac<br>tobacill<br>ales | f__Stre<br>ptococc<br>aceae | g__Strepto<br>coccus | s__Streptococ<br>cus lutetiensis  |
| MGYG-HGUT-00089:s__CAG-353 sp900066885       | 0.6<br>52<br>27<br>04<br>69 | 0.1<br>21<br>81<br>40<br>11      | 0.9<br>75<br>67<br>17<br>57 | d_<br>_B<br>act<br>eri<br>a | p__Fi<br>rmicu<br>tes_A | c__Clo<br>stridia | o__Os<br>cillospi<br>rales | f__Rumi<br>nococca<br>ceae  | g__CAG-<br>353       | s__CAG-353<br>sp900066885         |
| MGYG-HGUT-00090:s__Lawsonibacter unknown_2   | 0.8<br>12<br>25             | 0.0<br>63<br>46                  | 0.9<br>87<br>14             | d_<br>_B<br>act             | p__Fi<br>rmicu<br>tes_A | c__Clo<br>stridia | o__Os<br>cillospi<br>rales | f__Oscil<br>lospirac<br>eae | g__Lawson<br>ibacter | s__Lawsoniba<br>cter<br>unknown_2 |

|                                                  |                             |                                  |                             |                             |                                 |                                        |                                     |                                      |                          |                                         |
|--------------------------------------------------|-----------------------------|----------------------------------|-----------------------------|-----------------------------|---------------------------------|----------------------------------------|-------------------------------------|--------------------------------------|--------------------------|-----------------------------------------|
|                                                  | 70<br>84                    | 61<br>91                         | 23<br>02                    | eri<br>a                    |                                 |                                        |                                     |                                      |                          |                                         |
| MGYG-HGUT-00092:s__UBA7160 unknown_1             | 0.7<br>17<br>54<br>91<br>96 | 0.0<br>99<br>31<br>07<br>4       | 0.9<br>79<br>45<br>84<br>75 | d_<br>_B<br>act<br>eri<br>a | p__Fi<br>rmicu<br>tes_A         | c__Clo<br>stridia                      | o__Lac<br>hnospi<br>rales           | f__Lach<br>nospi<br>rac<br>eae       | g__UBA71<br>60           | s__UBA7160<br>unknown_1                 |
| MGYG-HGUT-00093:s__Klebsiella_A grimontii        | 0.8<br>53<br>79<br>74<br>52 | -<br>0.0<br>49<br>88<br>90<br>8  | 0.9<br>92<br>87<br>80<br>88 | d_<br>_B<br>act<br>eri<br>a | p__Pr<br>oteob<br>acteri<br>a   | c__Ga<br>mmap<br>roteo<br>bacter<br>ia | o__Ent<br>erobac<br>terales         | f__Ente<br>robacte<br>riaceae        | g__Klebsie<br>lla_A      | s__Klebsiella_<br>A grimontii           |
| MGYG-HGUT-00094:s__Collinsella unknown_2         | 0.4<br>03<br>47<br>53<br>53 | 0.2<br>27<br>74<br>50<br>56      | 0.9<br>39<br>70<br>92<br>5  | d_<br>_B<br>act<br>eri<br>a | p__A<br>ctino<br>bacte<br>riota | c__Co<br>riobac<br>teriia              | o__Cor<br>iobact<br>eriales         | f__Cori<br>obacteri<br>aceae         | g__Collins<br>ella       | s__Collinsella<br>unknown_2             |
| MGYG-HGUT-00095:s__GCA-900066755 unknown         | 0.7<br>57<br>13<br>13<br>59 | 0.0<br>80<br>61<br>22<br>32      | 0.9<br>79<br>45<br>84<br>75 | d_<br>_B<br>act<br>eri<br>a | p__Fi<br>rmicu<br>tes_A         | c__Clo<br>stridia                      | o__Lac<br>hnospi<br>rales           | f__Lach<br>nospi<br>rac<br>eae       | g__GCA-<br>90006675<br>5 | s__GCA-<br>900066755<br>unknown         |
| MGYG-HGUT-00098:s__Bacteroides bouchedurhonensis | 0.8<br>79<br>47<br>23<br>8  | 0.0<br>42<br>27<br>53<br>06      | 0.9<br>94<br>47<br>94<br>74 | d_<br>_B<br>act<br>eri<br>a | p__B<br>acter<br>oidot<br>a     | c__Ba<br>cteroi<br>dia                 | o__Bac<br>teroida<br>les            | f__Bact<br>eroidac<br>eae            | g__Bacter<br>oides       | s__Bacteroides<br>bouchedurh<br>onensis |
| MGYG-HGUT-00099:s__Flavonifractor plautii        | 0.9<br>06<br>02<br>81<br>19 | -<br>0.0<br>32<br>81<br>82<br>9  | 0.9<br>94<br>47<br>94<br>74 | d_<br>_B<br>act<br>eri<br>a | p__Fi<br>rmicu<br>tes_A         | c__Clo<br>stridia                      | o__Os<br>cillospi<br>rales          | f__Oscil<br>lospirac<br>eae          | g__Flavoni<br>fractor    | s__Flavonifra<br>ctor plautii           |
| MGYG-HGUT-00102:s__Terrisporobacter unknown_1    | 0.3<br>59<br>67<br>43<br>36 | -<br>0.2<br>43<br>80<br>39<br>8  | 0.9<br>39<br>70<br>92<br>5  | d_<br>_B<br>act<br>eri<br>a | p__Fi<br>rmicu<br>tes_A         | c__Clo<br>stridia                      | o__Pe<br>ptostre<br>ptococ<br>cales | f__Pept<br>ostrept<br>ococcac<br>eae | g__Terrisp<br>orobacter  | s__Terrisporo<br>bacter<br>unknown_1    |
| MGYG-HGUT-00104:s__Clostridium unknown_1         | 0.3<br>86<br>34<br>34<br>86 | -<br>0.2<br>42<br>54<br>66<br>85 | 0.9<br>39<br>70<br>92<br>5  | d_<br>_B<br>act<br>eri<br>a | p__Fi<br>rmicu<br>tes_A         | c__Clo<br>stridia                      | o__Clo<br>stridial<br>es            | f__Clost<br>ridiacea<br>e            | g__Clostri<br>dium       | s__Clostridiu<br>m<br>unknown_1         |

|                                                      |                             |                                  |                             |                             |                                 |                                        |                             |                               |                                   |                                                |
|------------------------------------------------------|-----------------------------|----------------------------------|-----------------------------|-----------------------------|---------------------------------|----------------------------------------|-----------------------------|-------------------------------|-----------------------------------|------------------------------------------------|
| MGYG-HGUT-00105:s__Bacteroides clarus                | 0.1<br>11<br>35<br>48<br>59 | -<br>0.4<br>40<br>36<br>09<br>7  | 0.8<br>83<br>30<br>72<br>56 | d_<br>_B<br>act<br>eri<br>a | p__B<br>acter<br>oidot<br>a     | c__Ba<br>cteroi<br>dia                 | o__Bac<br>teroida<br>les    | f__Bact<br>eroidac<br>eae     | g__Bacter<br>oides                | s__Bacteroi<br>des clarus                      |
| MGYG-HGUT-00106:s__Enterococcus_D gallinarum         | 0.1<br>47<br>46<br>72<br>98 | -<br>0.3<br>97<br>81<br>70<br>21 | 0.8<br>91<br>82<br>55<br>59 | d_<br>_B<br>act<br>eri<br>a | p__Fi<br>rmicu<br>tes           | c__Ba<br>cilli                         | o__Lac<br>tobacill<br>ales  | f__Ente<br>rococca<br>ceae    | g__Entero<br>coccus_D             | s__Enterococ<br>cus_D<br>gallinarum            |
| MGYG-HGUT-00108:s__Citrobacter freundii              | 0.7<br>53<br>44<br>93<br>2  | 0.0<br>87<br>87<br>45<br>68      | 0.9<br>79<br>45<br>84<br>75 | d_<br>_B<br>act<br>eri<br>a | p__Pr<br>oteob<br>acteri<br>a   | c__Ga<br>mmap<br>roteo<br>bacter<br>ia | o__Ent<br>erobac<br>terales | f__Ente<br>robacte<br>riaceae | g__Citroba<br>cter                | s__Citrobacte<br>r freundii                    |
| MGYG-HGUT-00109:s__Streptococcus unknown_1           | 0.3<br>76<br>92<br>29<br>57 | 0.2<br>47<br>81<br>67<br>68      | 0.9<br>39<br>70<br>92<br>5  | d_<br>_B<br>act<br>eri<br>a | p__Fi<br>rmicu<br>tes           | c__Ba<br>cilli                         | o__Lac<br>tobacill<br>ales  | f__Stre<br>ptococc<br>aceae   | g__Strepto<br>coccus              | s__Streptococ<br>cus<br>unknown_1              |
| MGYG-HGUT-00112:s__Actinomyces sp900323545           | 0.5<br>54<br>01<br>77<br>14 | 0.1<br>62<br>31<br>26<br>92      | 0.9<br>68<br>53<br>20<br>73 | d_<br>_B<br>act<br>eri<br>a | p__A<br>ctino<br>bacte<br>riota | c__Ac<br>tinoba<br>cteria              | o__Act<br>inomyc<br>etales  | f__Actin<br>omycet<br>aceae   | g__Actino<br>myces                | s__Actinomyc<br>es<br>sp900323545              |
| MGYG-HGUT-00113:s__Streptococcus salivarius          | 0.3<br>85<br>19<br>58<br>71 | 0.2<br>42<br>91<br>82<br>18      | 0.9<br>39<br>70<br>92<br>5  | d_<br>_B<br>act<br>eri<br>a | p__Fi<br>rmicu<br>tes           | c__Ba<br>cilli                         | o__Lac<br>tobacill<br>ales  | f__Stre<br>ptococc<br>aceae   | g__Strepto<br>coccus              | s__Streptococ<br>cus salivarius                |
| MGYG-HGUT-00114:s__Streptococcus unknown_2           | 0.4<br>88<br>61<br>33<br>14 | -<br>0.1<br>94<br>04<br>56<br>35 | 0.9<br>68<br>53<br>20<br>73 | d_<br>_B<br>act<br>eri<br>a | p__Fi<br>rmicu<br>tes           | c__Ba<br>cilli                         | o__Lac<br>tobacill<br>ales  | f__Stre<br>ptococc<br>aceae   | g__Strepto<br>coccus              | s__Streptococ<br>cus<br>unknown_2              |
| MGYG-HGUT-00117:s__Barnesiella sp003150885           | 0.1<br>43<br>17<br>72<br>4  | -<br>0.4<br>06<br>11<br>72<br>61 | 0.8<br>91<br>82<br>55<br>59 | d_<br>_B<br>act<br>eri<br>a | p__B<br>acter<br>oidot<br>a     | c__Ba<br>cteroi<br>dia                 | o__Bac<br>teroida<br>les    | f__Barn<br>esiellac<br>eae    | g__Barnesi<br>ella                | s__Barnesiell<br>a<br>sp003150885              |
| MGYG-HGUT-00118:s__Lachnospiraceae unknown unknown_1 | 0.9<br>63<br>56             | 0.0<br>12<br>74                  | 0.9<br>94<br>47             | d_<br>_B<br>act             | p__Fi<br>rmicu<br>tes_A         | c__Clo<br>stridia                      | o__Lac<br>hnospi<br>rales   | f__Lach<br>nospirac<br>eae    | g__Lachno<br>spiraceae<br>unknown | s__Lachnospir<br>aceae<br>unknown<br>unknown_1 |

|                                                       |                             |                                  |                             |                             |                               |                                        |                                     |                                |                                     |                                                 |
|-------------------------------------------------------|-----------------------------|----------------------------------|-----------------------------|-----------------------------|-------------------------------|----------------------------------------|-------------------------------------|--------------------------------|-------------------------------------|-------------------------------------------------|
|                                                       | 71<br>86                    | 58<br>1                          | 94<br>74                    | eri<br>a                    |                               |                                        |                                     |                                |                                     |                                                 |
| MGYG-HGUT-00119:s__Blautia sp000432195                | 0.0<br>31<br>84<br>32<br>42 | 0.5<br>87<br>53<br>02<br>96      | 0.7<br>68<br>22<br>58<br>34 | d_<br>_B<br>act<br>eri<br>a | p__Fi<br>rmicu<br>tes_A       | c__Clo<br>stridia                      | o__Lac<br>hnospi<br>rales           | f__Lach<br>nospi<br>rac<br>eae | g__Blautia                          | s__Blautia<br>sp000432195                       |
| MGYG-HGUT-00121:s__Eubacterium callanderi             | 0.4<br>17<br>08<br>89<br>75 | 0.2<br>19<br>71<br>59<br>95      | 0.9<br>39<br>70<br>92<br>5  | d_<br>_B<br>act<br>eri<br>a | p__Fi<br>rmicu<br>tes_A       | c__Clo<br>stridia                      | o__Eu<br>bacteri<br>ales            | f__Euba<br>cteriace<br>ae      | g__Eubact<br>erium                  | s__Eubacteriu<br>m callanderi                   |
| MGYG-HGUT-00123:s__Blautia sp001304935                | 0.7<br>07<br>56<br>39<br>04 | -<br>0.1<br>03<br>54<br>93<br>38 | 0.9<br>79<br>45<br>84<br>75 | d_<br>_B<br>act<br>eri<br>a | p__Fi<br>rmicu<br>tes_A       | c__Clo<br>stridia                      | o__Lac<br>hnospi<br>rales           | f__Lach<br>nospi<br>rac<br>eae | g__Blautia                          | s__Blautia<br>sp001304935                       |
| MGYG-HGUT-00124:s__Citrobacter pasteurii              | 0.5<br>50<br>82<br>98<br>87 | 0.1<br>59<br>59<br>28<br>83      | 0.9<br>68<br>53<br>20<br>73 | d_<br>_B<br>act<br>eri<br>a | p__Pr<br>oteob<br>acteri<br>a | c__Ga<br>mmap<br>roteo<br>bacter<br>ia | o__Ent<br>erobac<br>terales         | f__Ente<br>robacte<br>riaceae  | g__Citroba<br>cter                  | s__Citrobacte<br>r pasteurii                    |
| MGYG-HGUT-00126:s__Anaerovoracaceae unknown unknown_2 | 0.0<br>99<br>03<br>94<br>58 | 0.4<br>53<br>34<br>00<br>84      | 0.8<br>83<br>30<br>72<br>56 | d_<br>_B<br>act<br>eri<br>a | p__Fi<br>rmicu<br>tes_A       | c__Clo<br>stridia                      | o__Pe<br>ptostre<br>ptococ<br>cales | f__Anaer<br>ovorac<br>aceae    | g__Anaero<br>voracacea<br>e unknown | s__Anaerovor<br>acaceae<br>unknown<br>unknown_2 |
| MGYG-HGUT-00127:s__UBA7096 unknown_1                  | 0.2<br>85<br>77<br>37<br>21 | -<br>0.2<br>87<br>80<br>22<br>32 | 0.9<br>29<br>02<br>59<br>13 | d_<br>_B<br>act<br>eri<br>a | p__Fi<br>rmicu<br>tes_A       | c__Clo<br>stridia                      | o__Lac<br>hnospi<br>rales           | f__Lach<br>nospi<br>rac<br>eae | g__UBA70<br>96                      | s__UBA7096<br>unknown_1                         |
| MGYG-HGUT-00128:s__Alistipes unknown_1                | 0.9<br>81<br>45<br>77<br>69 | 0.0<br>06<br>49<br>73<br>98      | 0.9<br>97<br>64<br>79<br>14 | d_<br>_B<br>act<br>eri<br>a | p__B<br>acter<br>oidot<br>a   | c__Ba<br>cteroi<br>dia                 | o__Bac<br>teroida<br>les            | f__Rike<br>nellacea<br>e       | g__Alistipe<br>s                    | s__Alistipes<br>unknown_1                       |
| MGYG-HGUT-00129:s__Marseille-P4683 sp900232885        | 0.3<br>79<br>64<br>44<br>86 | 0.2<br>44<br>75<br>01<br>25      | 0.9<br>39<br>70<br>92<br>5  | d_<br>_B<br>act<br>eri<br>a | p__Fi<br>rmicu<br>tes_A       | c__Clo<br>stridia                      | o__Os<br>cillospi<br>rales          | f__Acut<br>alibacte<br>raceae  | g__Marseil<br>le-P4683              | s__Marseille-<br>P4683<br>sp900232885           |
| MGYG-HGUT-00131:s__Anaerotruncus rubiinfantis         | 0.7<br>85<br>17             | -<br>0.0<br>67<br>97             | 0.9<br>81<br>19             | d_<br>_B<br>act             | p__Fi<br>rmicu<br>tes_A       | c__Clo<br>stridia                      | o__Os<br>cillospi<br>rales          | f__Rumi<br>nococca<br>ceae     | g__Anaero<br>truncus                | s__Anaerotr<br>uncus<br>rubiinfantis            |



|                                                      |                             |                                  |                             |                             |                             |                        |                           |                                |                                   |                                                |
|------------------------------------------------------|-----------------------------|----------------------------------|-----------------------------|-----------------------------|-----------------------------|------------------------|---------------------------|--------------------------------|-----------------------------------|------------------------------------------------|
|                                                      | 49<br>98                    | 81<br>53                         | 42<br>11                    | eri<br>a                    |                             |                        |                           |                                |                                   |                                                |
| MGYG-HGUT-00133:s__Blautia_A sp000433815             | 0.9<br>49<br>99<br>62<br>94 | -<br>0.0<br>17<br>39<br>40<br>93 | 0.9<br>94<br>47<br>94<br>74 | d_<br>_B<br>act<br>eri<br>a | p__Fi<br>rmicu<br>tes_A     | c__Clo<br>stridia      | o__Lac<br>hnospi<br>rales | f__Lach<br>nospi<br>rac<br>eae | g__Blautia<br>_A                  | s__Blautia_A<br>sp000433815                    |
| MGYG-HGUT-00136:s__Agathobacter sp000434275          | 0.2<br>86<br>78<br>30<br>7  | 0.2<br>88<br>42<br>29<br>2       | 0.9<br>29<br>02<br>59<br>13 | d_<br>_B<br>act<br>eri<br>a | p__Fi<br>rmicu<br>tes_A     | c__Clo<br>stridia      | o__Lac<br>hnospi<br>rales | f__Lach<br>nospi<br>rac<br>eae | g__Agathob<br>acter               | s__Agathobac<br>ter<br>sp000434275             |
| MGYG-HGUT-00137:s__UBA7160 unknown_2                 | 0.5<br>77<br>00<br>13<br>36 | 0.1<br>52<br>70<br>94<br>87      | 0.9<br>75<br>67<br>17<br>57 | d_<br>_B<br>act<br>eri<br>a | p__Fi<br>rmicu<br>tes_A     | c__Clo<br>stridia      | o__Lac<br>hnospi<br>rales | f__Lach<br>nospi<br>rac<br>eae | g__UBA71<br>60                    | s__UBA7160<br>unknown_2                        |
| MGYG-HGUT-00138:s__Parabacteroides johnsonii         | 0.1<br>39<br>26<br>82<br>21 | -<br>0.4<br>12<br>25<br>16<br>76 | 0.8<br>91<br>82<br>55<br>59 | d_<br>_B<br>act<br>eri<br>a | p__B<br>acter<br>oidot<br>a | c__Ba<br>cteroi<br>dia | o__Bac<br>teroida<br>les  | f__Tann<br>erellace<br>ae      | g__Paraba<br>cteroides            | s__Parabacte<br>roides<br>johnsonii            |
| MGYG-HGUT-00139:s__Eubacterium_G sp000434315         | 0.5<br>90<br>59<br>37<br>58 | 0.1<br>49<br>08<br>59<br>52      | 0.9<br>75<br>67<br>17<br>57 | d_<br>_B<br>act<br>eri<br>a | p__Fi<br>rmicu<br>tes_A     | c__Clo<br>stridia      | o__Lac<br>hnospi<br>rales | f__Lach<br>nospi<br>rac<br>eae | g__Eubact<br>erium_G              | s__Eubacteriu<br>m_G<br>sp000434315            |
| MGYG-HGUT-00140:s__CAG-56 sp900066615                | 0.1<br>69<br>18<br>78<br>64 | 0.3<br>79<br>51<br>30<br>8       | 0.8<br>91<br>82<br>55<br>59 | d_<br>_B<br>act<br>eri<br>a | p__Fi<br>rmicu<br>tes_A     | c__Clo<br>stridia      | o__Lac<br>hnospi<br>rales | f__Lach<br>nospi<br>rac<br>eae | g__CAG-<br>56                     | s__CAG-56<br>sp900066615                       |
| MGYG-HGUT-00141:s__Lachnospiraceae unknown unknown_2 | 0.1<br>79<br>50<br>39<br>66 | 0.3<br>60<br>85<br>14<br>41      | 0.8<br>91<br>82<br>55<br>59 | d_<br>_B<br>act<br>eri<br>a | p__Fi<br>rmicu<br>tes_A     | c__Clo<br>stridia      | o__Lac<br>hnospi<br>rales | f__Lach<br>nospi<br>rac<br>eae | g__Lachno<br>spiraceae<br>unknown | s__Lachnospi<br>raceae<br>unknown<br>unknown_2 |
| MGYG-HGUT-00142:s__Blautia_A massiliensis            | 0.3<br>47<br>20<br>91<br>13 | 0.2<br>46<br>86<br>07<br>87      | 0.9<br>39<br>70<br>92<br>5  | d_<br>_B<br>act<br>eri<br>a | p__Fi<br>rmicu<br>tes_A     | c__Clo<br>stridia      | o__Lac<br>hnospi<br>rales | f__Lach<br>nospi<br>rac<br>eae | g__Blautia<br>_A                  | s__Blautia_A<br>massiliensis                   |
| MGYG-HGUT-00144:s__Barnesiella intestinihominis      | 0.2<br>56<br>95             | -<br>0.3<br>17<br>19             | 0.9<br>05<br>66             | d_<br>_B<br>act             | p__B<br>acter<br>oidot<br>a | c__Ba<br>cteroi<br>dia | o__Bac<br>teroida<br>les  | f__Barn<br>esiellac<br>eae     | g__Barnesi<br>ella                | s__Barnesiell<br>a<br>intestinihomi<br>nis     |

|                                               |                             |                                  |                             |                             |                         |                           |                             |                                |                    |                                     |
|-----------------------------------------------|-----------------------------|----------------------------------|-----------------------------|-----------------------------|-------------------------|---------------------------|-----------------------------|--------------------------------|--------------------|-------------------------------------|
|                                               | 18<br>6                     | 17<br>16                         | 66<br>14                    | eri<br>a                    |                         |                           |                             |                                |                    |                                     |
| MGYG-HGUT-00146:s__Dorea formicigenerans      | 0.5<br>67<br>18<br>11<br>92 | 0.1<br>54<br>61<br>64<br>17      | 0.9<br>71<br>33<br>90<br>3  | d_<br>_B<br>act<br>eri<br>a | p__Fi<br>rmicu<br>tes_A | c__Clo<br>stridia         | o__Lac<br>hnospi<br>rales   | f__Lach<br>nospi<br>rac<br>eae | g__Dorea           | s__Dorea<br>formicigenerans         |
| MGYG-HGUT-00148:s__Tyzzerella nexilis         | 0.4<br>17<br>43<br>76<br>32 | -<br>0.2<br>17<br>88<br>48<br>4  | 0.9<br>39<br>70<br>92<br>5  | d_<br>_B<br>act<br>eri<br>a | p__Fi<br>rmicu<br>tes_A | c__Clo<br>stridia         | o__Lac<br>hnospi<br>rales   | f__Lach<br>nospi<br>rac<br>eae | g__Tyzzer<br>ella  | s__Tyzzerella<br>nexilis            |
| MGYG-HGUT-00149:s__Clostridium saudiense      | 0.6<br>69<br>98<br>77<br>97 | -<br>0.1<br>19<br>51<br>22<br>83 | 0.9<br>75<br>67<br>17<br>57 | d_<br>_B<br>act<br>eri<br>a | p__Fi<br>rmicu<br>tes_A | c__Clo<br>stridia         | o__Clo<br>stridial<br>es    | f__Clost<br>ridiacea<br>e      | g__Clostri<br>dium | s__Clostridium<br>saudiense         |
| MGYG-HGUT-00150:s__Hungatella hathewayi       | 0.7<br>59<br>51<br>17<br>78 | 0.0<br>80<br>55<br>21<br>15      | 0.9<br>79<br>45<br>84<br>75 | d_<br>_B<br>act<br>eri<br>a | p__Fi<br>rmicu<br>tes_A | c__Clo<br>stridia         | o__Lac<br>hnospi<br>rales   | f__Lach<br>nospi<br>rac<br>eae | g__Hungat<br>ella  | s__Hungatella<br>hathewayi          |
| MGYG-HGUT-00151:s__Clostridium paraputrificum | 0.6<br>36<br>40<br>01<br>53 | 0.1<br>31<br>35<br>78<br>25      | 0.9<br>75<br>67<br>17<br>57 | d_<br>_B<br>act<br>eri<br>a | p__Fi<br>rmicu<br>tes_A | c__Clo<br>stridia         | o__Clo<br>stridial<br>es    | f__Clost<br>ridiacea<br>e      | g__Clostri<br>dium | s__Clostridium<br>paraputrificum    |
| MGYG-HGUT-00153:s__CAG-45 sp000438375         | 0.2<br>47<br>92<br>69<br>93 | 0.3<br>18<br>97<br>93<br>86      | 0.9<br>02<br>18<br>13<br>67 | d_<br>_B<br>act<br>eri<br>a | p__Fi<br>rmicu<br>tes_A | c__Clo<br>stridia         | o__Lac<br>hnospi<br>rales   | f__Lach<br>nospi<br>rac<br>eae | g__CAG-<br>45      | s__CAG-45<br>sp000438375            |
| MGYG-HGUT-00154:s__CAG-45 sp900066395         | 0.6<br>39<br>61<br>73<br>71 | 0.1<br>30<br>48<br>24<br>86      | 0.9<br>75<br>67<br>17<br>57 | d_<br>_B<br>act<br>eri<br>a | p__Fi<br>rmicu<br>tes_A | c__Clo<br>stridia         | o__Lac<br>hnospi<br>rales   | f__Lach<br>nospi<br>rac<br>eae | g__CAG-<br>45      | s__CAG-45<br>sp900066395            |
| MGYG-HGUT-00155:s__Weissella confusa          | 0.2<br>80<br>74<br>38<br>84 | -<br>0.2<br>95<br>59<br>48<br>98 | 0.9<br>29<br>02<br>59<br>13 | d_<br>_B<br>act<br>eri<br>a | p__Fi<br>rmicu<br>tes   | c__Ba<br>cilli            | o__Lac<br>tobacill<br>ales  | f__Lact<br>obacilla<br>ceae    | g__Weisse<br>lla   | s__Weissella<br>confusa             |
| MGYG-HGUT-00156:s__Collinsella sp002232035_1  | 0.0<br>57<br>24             | 0.5<br>21<br>92                  | 0.8<br>57<br>21             | d_<br>_B<br>act             | p__A<br>ctino           | c__Co<br>riobac<br>teriia | o__Cor<br>iobact<br>eriales | f__Cori<br>obacteri<br>aceae   | g__Collins<br>ella | s__Collinsella<br>sp002232035<br>_1 |

|                                              |                             |                                  |                             |                             |                                 |                           |                             |                                |                                   |                                                |
|----------------------------------------------|-----------------------------|----------------------------------|-----------------------------|-----------------------------|---------------------------------|---------------------------|-----------------------------|--------------------------------|-----------------------------------|------------------------------------------------|
|                                              | 71<br>03                    | 56<br>86                         | 13<br>2                     | eri<br>a                    | bacte<br>riota                  |                           |                             |                                |                                   |                                                |
| MGYG-HGUT-00158:s__Collinsella unknown_3     | 0.1<br>11<br>78<br>98<br>94 | 0.4<br>35<br>60<br>53<br>29      | 0.8<br>83<br>30<br>72<br>56 | d_<br>_B<br>act<br>eri<br>a | p__A<br>ctino<br>bacte<br>riota | c__Co<br>riobac<br>teriia | o__Cor<br>iobact<br>eriales | f__Cori<br>obacteri<br>aceae   | g__Collins<br>ella                | s__Collinsella<br>unknown_3                    |
| MGYG-HGUT-00159:s__Sellimonas intestinalis   | 0.2<br>50<br>60<br>25<br>02 | -<br>0.3<br>18<br>35<br>72<br>33 | 0.9<br>02<br>18<br>13<br>67 | d_<br>_B<br>act<br>eri<br>a | p__Fi<br>rmicu<br>tes_A         | c__Clo<br>stridia         | o__Lac<br>hnospi<br>rales   | f__Lach<br>nospi<br>rac<br>eae | g__Sellimo<br>nas                 | s__Sellimonas<br>intestinalis                  |
| MGYG-HGUT-00164:s__Lachnospiraceae unknown_3 | 0.2<br>93<br>02<br>15<br>89 | 0.2<br>93<br>70<br>00<br>55      | 0.9<br>29<br>02<br>59<br>13 | d_<br>_B<br>act<br>eri<br>a | p__Fi<br>rmicu<br>tes_A         | c__Clo<br>stridia         | o__Lac<br>hnospi<br>rales   | f__Lach<br>nospi<br>rac<br>eae | g__Lachno<br>spiraceae<br>unknown | s__Lachnospir<br>aceae<br>unknown<br>unknown_3 |
| MGYG-HGUT-00166:s__Lactobacillus_H fermentum | 0.3<br>53<br>52<br>09<br>79 | 0.2<br>49<br>86<br>46<br>56      | 0.9<br>39<br>70<br>92<br>5  | d_<br>_B<br>act<br>eri<br>a | p__Fi<br>rmicu<br>tes           | c__Ba<br>cilli            | o__Lac<br>tobacill<br>ales  | f__Lact<br>obacilla<br>ceae    | g__Lactob<br>acillus_H            | s__Lactobacill<br>us_H<br>fermentum            |
| MGYG-HGUT-00167:s__Collinsella sp002232035_2 | 0.2<br>42<br>41<br>38<br>54 | 0.3<br>17<br>89<br>18<br>44      | 0.9<br>02<br>18<br>13<br>67 | d_<br>_B<br>act<br>eri<br>a | p__A<br>ctino<br>bacte<br>riota | c__Co<br>riobac<br>teriia | o__Cor<br>iobact<br>eriales | f__Cori<br>obacteri<br>aceae   | g__Collins<br>ella                | s__Collinsella<br>sp002232035<br>_2            |
| MGYG-HGUT-00168:s__Butyricimonas unknown_1   | 0.7<br>49<br>80<br>28<br>17 | 0.0<br>87<br>97<br>43<br>05      | 0.9<br>79<br>45<br>84<br>75 | d_<br>_B<br>act<br>eri<br>a | p__B<br>acter<br>oidot<br>a     | c__Ba<br>cteroi<br>dia    | o__Bac<br>teroida<br>les    | f__Mari<br>nifilacea<br>e      | g__Butyric<br>imonas              | s__Butyricim<br>onas<br>unknown_1              |
| MGYG-HGUT-00169:s__Eubacterium_G sp000432355 | 0.3<br>82<br>56<br>27<br>08 | 0.2<br>44<br>26<br>16<br>67      | 0.9<br>39<br>70<br>92<br>5  | d_<br>_B<br>act<br>eri<br>a | p__Fi<br>rmicu<br>tes_A         | c__Clo<br>stridia         | o__Lac<br>hnospi<br>rales   | f__Lach<br>nospi<br>rac<br>eae | g__Eubact<br>erium_G              | s__Eubacteriu<br>m_G<br>sp000432355            |
| MGYG-HGUT-00170:s__Alistipes_A sp900240235   | 0.0<br>59<br>26<br>87<br>82 | -<br>0.5<br>23<br>44<br>36<br>4  | 0.8<br>57<br>21<br>13<br>2  | d_<br>_B<br>act<br>eri<br>a | p__B<br>acter<br>oidot<br>a     | c__Ba<br>cteroi<br>dia    | o__Bac<br>teroida<br>les    | f__Rike<br>nellacea<br>e       | g__Alistipe<br>s_A                | s__Alistipes_<br>A<br>sp900240235              |
| MGYG-HGUT-00171:s__Blautia_A sp900120195     | 0.2<br>16<br>94             | 0.3<br>36<br>23                  | 0.8<br>91<br>82             | d_<br>_B<br>act             | p__Fi<br>rmicu<br>tes_A         | c__Clo<br>stridia         | o__Lac<br>hnospi<br>rales   | f__Lach<br>nospi<br>rac<br>eae | g__Blautia<br>_A                  | s__Blautia_A<br>sp900120195                    |

|                                              |                             |                                  |                             |                             |                                 |                           |                             |                                |                        |                                     |
|----------------------------------------------|-----------------------------|----------------------------------|-----------------------------|-----------------------------|---------------------------------|---------------------------|-----------------------------|--------------------------------|------------------------|-------------------------------------|
|                                              | 94<br>78                    | 26<br>59                         | 55<br>59                    | eri<br>a                    |                                 |                           |                             |                                |                        |                                     |
| MGYG-HGUT-00172:s__Clostridium_M lavalense   | 0.5<br>94<br>96<br>92<br>92 | 0.1<br>47<br>27<br>28<br>58      | 0.9<br>75<br>67<br>17<br>57 | d_<br>_B<br>act<br>eri<br>a | p__Fi<br>rmicu<br>tes_A         | c__Clo<br>stridia         | o__Lac<br>hnospi<br>rales   | f__Lach<br>nospi<br>rac<br>eae | g__Clostri<br>dium_M   | s__Clostridi<br>um_M<br>lavalense   |
| MGYG-HGUT-00174:s__Parabacteroides unknown_1 | 0.6<br>80<br>79<br>36<br>02 | -<br>0.1<br>13<br>29<br>34<br>76 | 0.9<br>75<br>67<br>17<br>57 | d_<br>_B<br>act<br>eri<br>a | p__B<br>acter<br>oidot<br>a     | c__Ba<br>cteroi<br>dia    | o__Bac<br>teroida<br>les    | f__Tann<br>erellac<br>eae      | g__Paraba<br>cteroides | s__Parabacte<br>roides<br>unknown_1 |
| MGYG-HGUT-00175:s__Faecalicatena sp000509105 | 0.4<br>84<br>25<br>45<br>89 | 0.1<br>95<br>33<br>33<br>88      | 0.9<br>68<br>53<br>20<br>73 | d_<br>_B<br>act<br>eri<br>a | p__Fi<br>rmicu<br>tes_A         | c__Clo<br>stridia         | o__Lac<br>hnospi<br>rales   | f__Lach<br>nospi<br>rac<br>eae | g__Faecali<br>catena   | s__Faecalicat<br>ena<br>sp000509105 |
| MGYG-HGUT-00176:s__Faecalicatena orotica     | 0.5<br>52<br>64<br>86<br>51 | -<br>0.1<br>66<br>73<br>15<br>6  | 0.9<br>68<br>53<br>20<br>73 | d_<br>_B<br>act<br>eri<br>a | p__Fi<br>rmicu<br>tes_A         | c__Clo<br>stridia         | o__Lac<br>hnospi<br>rales   | f__Lach<br>nospi<br>rac<br>eae | g__Faecali<br>catena   | s__Faecalicat<br>ena orotica        |
| MGYG-HGUT-00177:s__Anaerotignum sp000436415  | 0.8<br>94<br>00<br>36<br>67 | -<br>0.0<br>35<br>03<br>93<br>01 | 0.9<br>94<br>47<br>94<br>74 | d_<br>_B<br>act<br>eri<br>a | p__Fi<br>rmicu<br>tes_A         | c__Clo<br>stridia         | o__Lac<br>hnospi<br>rales   | f__Anae<br>rotignac<br>eae     | g__Anaero<br>tignum    | s__Anaerotig<br>num<br>sp000436415  |
| MGYG-HGUT-00178:s__Lawsonibacter unknown_3   | 0.9<br>46<br>47<br>60<br>99 | 0.0<br>18<br>33<br>70<br>18      | 0.9<br>94<br>47<br>94<br>74 | d_<br>_B<br>act<br>eri<br>a | p__Fi<br>rmicu<br>tes_A         | c__Clo<br>stridia         | o__Os<br>cillospi<br>rales  | f__Oscil<br>lospirac<br>eae    | g__Lawson<br>ibacter   | s__Lawsoniba<br>cter<br>unknown_3   |
| MGYG-HGUT-00179:s__Clostridium_M unknown_1   | 0.4<br>62<br>76<br>36<br>42 | -<br>0.2<br>05<br>39<br>34<br>87 | 0.9<br>65<br>57<br>46<br>92 | d_<br>_B<br>act<br>eri<br>a | p__Fi<br>rmicu<br>tes_A         | c__Clo<br>stridia         | o__Lac<br>hnospi<br>rales   | f__Lach<br>nospi<br>rac<br>eae | g__Clostri<br>dium_M   | s__Clostridi<br>um_M<br>unknown_1   |
| MGYG-HGUT-00180:s__Collinsella unknown_5     | 0.0<br>32<br>12<br>55<br>72 | 0.5<br>89<br>70<br>08<br>2       | 0.7<br>68<br>22<br>58<br>34 | d_<br>_B<br>act<br>eri<br>a | p__A<br>ctino<br>bacte<br>riota | c__Co<br>riobac<br>teriia | o__Cor<br>iobact<br>eriales | f__Cori<br>obacteri<br>aceae   | g__Collins<br>ella     | s__Collinsella<br>unknown_5         |

|                                                    |                             |                                  |                             |                             |                                 |                           |                               |                                |                      |                                               |
|----------------------------------------------------|-----------------------------|----------------------------------|-----------------------------|-----------------------------|---------------------------------|---------------------------|-------------------------------|--------------------------------|----------------------|-----------------------------------------------|
| MGYG-HGUT-00181:s__UBA9414 unknown                 | 0.2<br>92<br>37<br>86<br>07 | 0.2<br>85<br>88<br>15<br>54      | 0.9<br>29<br>02<br>59<br>13 | d_<br>_B<br>act<br>eri<br>a | p__Fi<br>rmicu<br>tes_A         | c__Clo<br>stridia         | o__Lac<br>hnospi<br>rales     | f__Lach<br>nospirac<br>eae     | g__UBA94<br>14       | s__UBA9414<br>unknown                         |
| MGYG-HGUT-00183:s__Butyricimonas sp002161485       | 0.7<br>62<br>40<br>42<br>86 | -<br>0.0<br>84<br>69<br>86<br>86 | 0.9<br>79<br>45<br>84<br>75 | d_<br>_B<br>act<br>eri<br>a | p__B<br>acter<br>oidot<br>a     | c__Ba<br>cteroi<br>dia    | o__Bac<br>teroida<br>les      | f__Mari<br>nifilacea<br>e      | g__Butyric<br>imonas | s__Butyricim<br>onas<br>sp002161485           |
| MGYG-HGUT-00184:s__Blautia_A unknown_1             | 0.3<br>05<br>24<br>18<br>08 | 0.2<br>78<br>92<br>57<br>69      | 0.9<br>29<br>02<br>59<br>13 | d_<br>_B<br>act<br>eri<br>a | p__Fi<br>rmicu<br>tes_A         | c__Clo<br>stridia         | o__Lac<br>hnospi<br>rales     | f__Lach<br>nospirac<br>eae     | g__Blautia<br>_A     | s__Blautia_A<br>unknown_1                     |
| MGYG-HGUT-00185:s__Agathobaculum butyriciproducens | 0.8<br>98<br>93<br>16<br>36 | -<br>0.0<br>35<br>63<br>58<br>53 | 0.9<br>94<br>47<br>94<br>74 | d_<br>_B<br>act<br>eri<br>a | p__Fi<br>rmicu<br>tes_A         | c__Clo<br>stridia         | o__Os<br>cillospi<br>rales    | f__Buty<br>ricicocc<br>aceae   | g__Agatho<br>baculum | s__Agathobac<br>ulum<br>butyriciprodu<br>cens |
| MGYG-HGUT-00186:s__Holdemana unknown_1             | 0.9<br>41<br>87<br>07<br>12 | 0.0<br>20<br>27<br>33            | 0.9<br>94<br>47<br>94<br>74 | d_<br>_B<br>act<br>eri<br>a | p__Fi<br>rmicu<br>tes           | c__Ba<br>cilli            | o__Ery<br>sipelot<br>richales | f__Erysi<br>pelotric<br>haceae | g__Holde<br>manella  | s__Holdema<br>nella<br>unknown_1              |
| MGYG-HGUT-00187:s__Lachnospira sp003537285         | 0.4<br>18<br>32<br>75<br>21 | 0.2<br>23<br>48<br>76<br>82      | 0.9<br>39<br>70<br>92<br>5  | d_<br>_B<br>act<br>eri<br>a | p__Fi<br>rmicu<br>tes_A         | c__Clo<br>stridia         | o__Lac<br>hnospi<br>rales     | f__Lach<br>nospirac<br>eae     | g__Lachno<br>spira   | s__Lachnospi<br>ra<br>sp003537285             |
| MGYG-HGUT-00188:s__Collinsella unknown_6           | 0.0<br>28<br>90<br>08<br>26 | 0.5<br>93<br>99<br>18<br>52      | 0.7<br>68<br>22<br>58<br>34 | d_<br>_B<br>act<br>eri<br>a | p__A<br>ctino<br>bacte<br>riota | c__Co<br>riobac<br>teriia | o__Cor<br>iobact<br>eriales   | f__Cori<br>obacteri<br>aceae   | g__Collins<br>ella   | s__Collinsella<br>unknown_6                   |
| MGYG-HGUT-00189:s__Coproccoccus sp900066115        | 0.6<br>63<br>61<br>37<br>32 | -<br>0.1<br>21<br>96<br>81<br>77 | 0.9<br>75<br>67<br>17<br>57 | d_<br>_B<br>act<br>eri<br>a | p__Fi<br>rmicu<br>tes_A         | c__Clo<br>stridia         | o__Lac<br>hnospi<br>rales     | f__Lach<br>nospirac<br>eae     | g__Coprocc<br>occus  | s__Coproccoc<br>cus<br>sp900066115            |
| MGYG-HGUT-00190:s__CAG-127 sp900319515             | 0.6<br>66<br>92<br>60<br>84 | -<br>0.1<br>18<br>44             | 0.9<br>75<br>67<br>17<br>57 | d_<br>_B<br>act<br>eri<br>a | p__Fi<br>rmicu<br>tes_A         | c__Clo<br>stridia         | o__Lac<br>hnospi<br>rales     | f__Lach<br>nospirac<br>eae     | g__CAG-<br>127       | s__CAG-127<br>sp900319515                     |

|                                                   |                             |                                  |                             |                             |                                 |                           |                                   |                                |                         |                                             |
|---------------------------------------------------|-----------------------------|----------------------------------|-----------------------------|-----------------------------|---------------------------------|---------------------------|-----------------------------------|--------------------------------|-------------------------|---------------------------------------------|
|                                                   |                             | 38<br>69                         |                             |                             |                                 |                           |                                   |                                |                         |                                             |
| MGYG-HGUT-00192:s__Holdemania filiformis          | 0.6<br>25<br>31<br>98<br>13 | -<br>0.1<br>35<br>78<br>30<br>01 | 0.9<br>75<br>67<br>17<br>57 | d_<br>_B<br>act<br>eri<br>a | p__Fi<br>rmicu<br>tes           | c__Ba<br>cilli            | o__Ery<br>sipelot<br>richale<br>s | f__Erysi<br>pelotric<br>haceae | g__Holde<br>mania       | s__Holdema<br>nia filiformis                |
| MGYG-HGUT-00193:s__KLE1615 sp900066985            | 0.4<br>71<br>34<br>39<br>52 | 0.1<br>96<br>84<br>96<br>61      | 0.9<br>68<br>19<br>40<br>79 | d_<br>_B<br>act<br>eri<br>a | p__Fi<br>rmicu<br>tes_A         | c__Clo<br>stridia         | o__Lac<br>hnospi<br>rales         | f__Lach<br>nospira<br>cae      | g__KLE161<br>5          | s__KLE1615<br>sp900066985                   |
| MGYG-HGUT-00194:s__UBA9502 unknown_1              | 0.6<br>25<br>56<br>57<br>34 | 0.1<br>33<br>33<br>29<br>69      | 0.9<br>75<br>67<br>17<br>57 | d_<br>_B<br>act<br>eri<br>a | p__Fi<br>rmicu<br>tes_A         | c__Clo<br>stridia         | o__Lac<br>hnospi<br>rales         | f__Lach<br>nospira<br>cae      | g__UBA95<br>02          | s__UBA9502<br>unknown_1                     |
| MGYG-HGUT-00195:s__Faecalibacterium prausnitzii_E | 0.2<br>59<br>46<br>61<br>23 | 0.3<br>12<br>35<br>54<br>73      | 0.9<br>10<br>93<br>50<br>93 | d_<br>_B<br>act<br>eri<br>a | p__Fi<br>rmicu<br>tes_A         | c__Clo<br>stridia         | o__Os<br>cillospi<br>rales        | f__Rumi<br>nococca<br>cae      | g__Faecali<br>bacterium | s__Faecalibac<br>terium<br>prausnitzii_E    |
| MGYG-HGUT-00196:s__Bacteroides thetaiotaomicron   | 0.5<br>67<br>47<br>50<br>68 | -<br>0.1<br>58<br>00<br>29<br>09 | 0.9<br>71<br>33<br>90<br>3  | d_<br>_B<br>act<br>eri<br>a | p__B<br>acter<br>oidot<br>a     | c__Ba<br>cteroi<br>dia    | o__Bac<br>teroida<br>les          | f__Bact<br>eroidac<br>cae      | g__Bacter<br>oides      | s__Bacteroides<br>thetaitaomicron           |
| MGYG-HGUT-00197:s__Collinsella unknown_7          | 0.6<br>52<br>68<br>79<br>76 | 0.1<br>21<br>24<br>06<br>8       | 0.9<br>75<br>67<br>17<br>57 | d_<br>_B<br>act<br>eri<br>a | p__A<br>ctino<br>bacte<br>riota | c__Co<br>riobac<br>teriia | o__Cor<br>iobact<br>eriales       | f__Cori<br>obacteri<br>aceae   | g__Collins<br>ella      | s__Collinsella<br>unknown_7                 |
| MGYG-HGUT-00198:s__Clostridium_M citroniae        | 0.5<br>56<br>07<br>75<br>73 | 0.1<br>63<br>47<br>18<br>44      | 0.9<br>68<br>53<br>20<br>73 | d_<br>_B<br>act<br>eri<br>a | p__Fi<br>rmicu<br>tes_A         | c__Clo<br>stridia         | o__Lac<br>hnospi<br>rales         | f__Lach<br>nospira<br>cae      | g__Clostri<br>dium_M    | s__Clostridium_M<br>citroniae               |
| MGYG-HGUT-00199:s__Streptococcus parasanguinis_B  | 0.7<br>79<br>07<br>53<br>01 | 0.0<br>78<br>53<br>57<br>26      | 0.9<br>79<br>52<br>04<br>84 | d_<br>_B<br>act<br>eri<br>a | p__Fi<br>rmicu<br>tes           | c__Ba<br>cilli            | o__Lac<br>tobacill<br>ales        | f__Stre<br>ptococc<br>aceae    | g__Strepto<br>coccus    | s__Streptococ<br>cus<br>parasanguinis<br>_B |
| MGYG-HGUT-00200:s__Blautia_A unknown_2            | 0.5<br>46<br>77             | 0.1<br>64<br>39                  | 0.9<br>68<br>53             | d_<br>_B<br>act             | p__Fi<br>rmicu<br>tes_A         | c__Clo<br>stridia         | o__Lac<br>hnospi<br>rales         | f__Lach<br>nospira<br>cae      | g__Blautia<br>_A        | s__Blautia_A<br>unknown_2                   |

|                                                      |                             |                                   |                             |                             |                                 |                           |                             |                                |                                   |                                                |
|------------------------------------------------------|-----------------------------|-----------------------------------|-----------------------------|-----------------------------|---------------------------------|---------------------------|-----------------------------|--------------------------------|-----------------------------------|------------------------------------------------|
|                                                      | 05<br>07                    | 07<br>22                          | 20<br>73                    | eri<br>a                    |                                 |                           |                             |                                |                                   |                                                |
| MGYG-HGUT-00201:s__Blautia_A sp900066145             | 0.9<br>39<br>05<br>98<br>28 | 0.0<br>21<br>21<br>89<br>22       | 0.9<br>94<br>47<br>94<br>74 | d_<br>_B<br>act<br>eri<br>a | p__Fi<br>rmicu<br>tes_A         | c__Clo<br>stridia         | o__Lac<br>hnospi<br>rales   | f__Lach<br>nospi<br>rac<br>eae | g__Blautia<br>_A                  | s__Blautia_A<br>sp900066145                    |
| MGYG-HGUT-00202:s__Lachnospiraceae unknown unknown_4 | 0.2<br>76<br>31<br>11<br>09 | 0.3<br>00<br>97<br>02<br>59<br>77 | 0.9<br>29<br>02<br>59<br>13 | d_<br>_B<br>act<br>eri<br>a | p__Fi<br>rmicu<br>tes_A         | c__Clo<br>stridia         | o__Lac<br>hnospi<br>rales   | f__Lach<br>nospi<br>rac<br>eae | g__Lachno<br>spiraceae<br>unknown | s__Lachnospir<br>aceae<br>unknown<br>unknown_4 |
| MGYG-HGUT-00203:s__Butyrimonas virosa                | 0.5<br>49<br>06<br>46<br>08 | 0.1<br>64<br>34<br>31<br>29       | 0.9<br>68<br>53<br>20<br>73 | d_<br>_B<br>act<br>eri<br>a | p__B<br>acter<br>oidot<br>a     | c__Ba<br>cteroi<br>dia    | o__Bac<br>teroida<br>les    | f__Mari<br>nifilacea<br>e      | g__Butyric<br>imonas              | s__Butyricim<br>onas virosa                    |
| MGYG-HGUT-00204:s__Eubacterium_G sp000435815         | 0.9<br>91<br>76<br>98<br>85 | -<br>0.0<br>02<br>87<br>59<br>57  | 0.9<br>98<br>80<br>33<br>46 | d_<br>_B<br>act<br>eri<br>a | p__Fi<br>rmicu<br>tes_A         | c__Clo<br>stridia         | o__Lac<br>hnospi<br>rales   | f__Lach<br>nospi<br>rac<br>eae | g__Eubact<br>erium_G              | s__Eubacteriu<br>m_G<br>sp000435815            |
| MGYG-HGUT-00205:s__CAG-81 sp900066535                | 0.4<br>27<br>59<br>84<br>36 | 0.2<br>19<br>94<br>07<br>86       | 0.9<br>50<br>39<br>60<br>26 | d_<br>_B<br>act<br>eri<br>a | p__Fi<br>rmicu<br>tes_A         | c__Clo<br>stridia         | o__Lac<br>hnospi<br>rales   | f__Lach<br>nospi<br>rac<br>eae | g__CAG-<br>81                     | s__CAG-81<br>sp900066535                       |
| MGYG-HGUT-00206:s__Dorea sp900066555                 | 0.7<br>92<br>57<br>23<br>36 | -<br>0.0<br>72<br>84<br>30<br>01  | 0.9<br>82<br>96<br>63       | d_<br>_B<br>act<br>eri<br>a | p__Fi<br>rmicu<br>tes_A         | c__Clo<br>stridia         | o__Lac<br>hnospi<br>rales   | f__Lach<br>nospi<br>rac<br>eae | g__Dorea                          | s__Dorea<br>sp900066555                        |
| MGYG-HGUT-00207:s__Collinsella sp002232035_3         | 0.2<br>05<br>83<br>82<br>62 | 0.3<br>53<br>85<br>02<br>08       | 0.8<br>91<br>82<br>55<br>59 | d_<br>_B<br>act<br>eri<br>a | p__A<br>ctino<br>bacte<br>riota | c__Co<br>riobac<br>teriia | o__Cor<br>iobact<br>eriales | f__Cori<br>obacteri<br>aceae   | g__Collins<br>ella                | s__Collinsella<br>sp002232035<br>_3            |
| MGYG-HGUT-00208:s__Eubacterium_G ventriosum          | 0.8<br>32<br>97<br>01<br>9  | -<br>0.0<br>58<br>59<br>58<br>27  | 0.9<br>92<br>22<br>01<br>9  | d_<br>_B<br>act<br>eri<br>a | p__Fi<br>rmicu<br>tes_A         | c__Clo<br>stridia         | o__Lac<br>hnospi<br>rales   | f__Lach<br>nospi<br>rac<br>eae | g__Eubact<br>erium_G              | s__Eubacteriu<br>m_G<br>ventriosum             |
| MGYG-HGUT-00209:s__Eubacterium_F sp003491505         | 0.9<br>24<br>01             | -<br>0.0<br>26                    | 0.9<br>94<br>47             | d_<br>_B<br>act             | p__Fi<br>rmicu<br>tes_A         | c__Clo<br>stridia         | o__Lac<br>hnospi<br>rales   | f__Lach<br>nospi<br>rac<br>eae | g__Eubact<br>erium_F              | s__Eubacteriu<br>m_F<br>sp003491505            |

|                                                                 |                             |                                  |                             |                             |                             |                        |                            |                            |                                       |                                                |
|-----------------------------------------------------------------|-----------------------------|----------------------------------|-----------------------------|-----------------------------|-----------------------------|------------------------|----------------------------|----------------------------|---------------------------------------|------------------------------------------------|
| ium_F<br>sp003491505                                            | 13<br>09                    | 76<br>24<br>8                    | 94<br>74                    | eri<br>a                    |                             |                        |                            |                            |                                       |                                                |
| MGYG-HGUT-<br>00211:s__Bacteroides<br>intestinalis_A            | 0.1<br>97<br>44<br>40<br>08 | -<br>0.3<br>57<br>64<br>91<br>82 | 0.8<br>91<br>82<br>55<br>59 | d_<br>_B<br>act<br>eri<br>a | p__B<br>acter<br>oidot<br>a | c__Ba<br>cteroi<br>dia | o__Bac<br>teroida<br>les   | f__Bact<br>eroidac<br>eae  | g__Bacter<br>oides                    | s__Bacteroides<br>intestinalis_A               |
| MGYG-HGUT-<br>00212:s__Blautia_A<br>obeum                       | 0.7<br>41<br>83<br>28<br>57 | 0.0<br>91<br>65<br>95<br>8       | 0.9<br>79<br>45<br>84<br>75 | d_<br>_B<br>act<br>eri<br>a | p__Fi<br>rmicu<br>tes_A     | c__Clo<br>stridia      | o__Lac<br>hnospi<br>rales  | f__Lach<br>nospi<br>rales  | g__Blautia<br>_A                      | s__Blautia_A<br>obeum                          |
| MGYG-HGUT-<br>00213:s__Blautia_A<br>unknown_3                   | 0.2<br>61<br>28<br>90<br>22 | 0.3<br>01<br>90<br>55<br>99      | 0.9<br>13<br>13<br>14<br>21 | d_<br>_B<br>act<br>eri<br>a | p__Fi<br>rmicu<br>tes_A     | c__Clo<br>stridia      | o__Lac<br>hnospi<br>rales  | f__Lach<br>nospi<br>rales  | g__Blautia<br>_A                      | s__Blautia_A<br>unknown_3                      |
| MGYG-HGUT-<br>00215:s__Prevotella<br>stercorea                  | 0.6<br>21<br>29<br>30<br>66 | -<br>0.1<br>38<br>48<br>21<br>08 | 0.9<br>75<br>67<br>17<br>57 | d_<br>_B<br>act<br>eri<br>a | p__B<br>acter<br>oidot<br>a | c__Ba<br>cteroi<br>dia | o__Bac<br>teroida<br>les   | f__Bact<br>eroidac<br>eae  | g__Prevot<br>ella                     | s__Prevotella<br>stercorea                     |
| MGYG-HGUT-<br>00216:s__Blautia_A<br>unknown_4                   | 0.2<br>15<br>38<br>89<br>34 | 0.3<br>41<br>31<br>92<br>97      | 0.8<br>91<br>82<br>55<br>59 | d_<br>_B<br>act<br>eri<br>a | p__Fi<br>rmicu<br>tes_A     | c__Clo<br>stridia      | o__Lac<br>hnospi<br>rales  | f__Lach<br>nospi<br>rales  | g__Blautia<br>_A                      | s__Blautia_A<br>unknown_4                      |
| MGYG-HGUT-<br>00217:s__Acetatifactor<br>sp900066565             | 0.1<br>14<br>48<br>31<br>16 | 0.4<br>18<br>46<br>36<br>61      | 0.8<br>83<br>30<br>72<br>56 | d_<br>_B<br>act<br>eri<br>a | p__Fi<br>rmicu<br>tes_A     | c__Clo<br>stridia      | o__Lac<br>hnospi<br>rales  | f__Lach<br>nospi<br>rales  | g__Acetati<br>factor                  | s__Acetatifactor<br>sp900066565                |
| MGYG-HGUT-<br>00219:s__Eubacterium<br>limosum_A                 | 0.0<br>06<br>71<br>56<br>7  | 0.6<br>93<br>17<br>71<br>33      | 0.7<br>50<br>05<br>64<br>24 | d_<br>_B<br>act<br>eri<br>a | p__Fi<br>rmicu<br>tes_A     | c__Clo<br>stridia      | o__Eu<br>bacteri<br>ales   | f__Euba<br>cteriace<br>ae  | g__Eubact<br>erium                    | s__Eubacterium<br>limosum_A                    |
| MGYG-HGUT-<br>00220:s__Butyricoc<br>caceae unknown<br>unknown_1 | 0.5<br>81<br>35<br>78<br>4  | -<br>0.1<br>41<br>33<br>62<br>89 | 0.9<br>75<br>67<br>17<br>57 | d_<br>_B<br>act<br>eri<br>a | p__Fi<br>rmicu<br>tes_A     | c__Clo<br>stridia      | o__Os<br>cillospi<br>rales | f__Buty<br>ricoc<br>caceae | g__Butyric<br>oc<br>caceae<br>unknown | s__Butyricoc<br>caceae<br>unknown<br>unknown_1 |



|                                              |                             |                                  |                             |                |                     |                   |                       |                        |                    |                              |
|----------------------------------------------|-----------------------------|----------------------------------|-----------------------------|----------------|---------------------|-------------------|-----------------------|------------------------|--------------------|------------------------------|
| MGYG-HGUT-00222:s__Parabacteroides unknown_2 | 0.9<br>10<br>50<br>66<br>15 | 0.0<br>31<br>25<br>68<br>69      | 0.9<br>94<br>47<br>94<br>74 | d__Bacteroidea | p__Bacteroidota     | c__Bacteroidia    | o__Bacteroidales      | f__Tannerellaceae      | g__Parabacteroides | s__Parabacteroides unknown_2 |
| MGYG-HGUT-00223:s__Absiella unknown_1        | 0.2<br>47<br>76<br>89<br>59 | 0.3<br>18<br>00<br>41<br>86      | 0.9<br>02<br>18<br>13<br>67 | d__Bacteroidia | p__Firmicutes       | c__Bacteriia      | o__Erysipelotrichales | f__Erysipelotrichaceae | g__Absiella        | s__Absiella unknown_1        |
| MGYG-HGUT-00224:s__Bacteroides sp003545565   | 0.8<br>41<br>58<br>35<br>98 | 0.0<br>56<br>16<br>97<br>99      | 0.9<br>92<br>87<br>80<br>88 | d__Bacteroidia | p__Bacteroidota     | c__Bacteroidia    | o__Bacteroidales      | f__Bacteroidaceae      | g__Bacteroides     | s__Bacteroides sp003545565   |
| MGYG-HGUT-00226:s__Lactococcus lactis        | 0.7<br>55<br>28<br>81<br>57 | 0.0<br>86<br>39<br>73<br>75      | 0.9<br>79<br>45<br>84<br>75 | d__Bacteroidia | p__Firmicutes       | c__Bacteriia      | o__Lactobacterales    | f__Streptococcaceae    | g__Lactococcus     | s__Lactococcus lactis        |
| MGYG-HGUT-00228:s__Collinsella sp002232035_4 | 0.5<br>34<br>13<br>86<br>78 | 0.1<br>73<br>86<br>85<br>61      | 0.9<br>68<br>53<br>20<br>73 | d__Bacteroidia | p__Actinobacteriota | c__Coriobacteriia | o__Coriobacteriales   | f__Coriobacteriaceae   | g__Collinsella     | s__Collinsella sp002232035_4 |
| MGYG-HGUT-00229:s__Dorea sp000433215         | 0.1<br>77<br>77<br>01<br>05 | 0.3<br>71<br>81<br>76<br>1       | 0.8<br>91<br>82<br>55<br>59 | d__Bacteroidia | p__Firmicutes_A     | c__Clostridia     | o__Lachnospirales     | f__Lachnospiraceae     | g__Dorea           | s__Dorea sp000433215         |
| MGYG-HGUT-00231:s__Coproccoccus eutactus_A   | 0.9<br>67<br>45<br>47<br>99 | -<br>0.0<br>11<br>06<br>40<br>23 | 0.9<br>94<br>47<br>94<br>74 | d__Bacteroidia | p__Firmicutes_A     | c__Clostridia     | o__Lachnospirales     | f__Lachnospiraceae     | g__Coproccoccus    | s__Coproccoccus eutactus_A   |
| MGYG-HGUT-00232:s__Collinsella unknown_9     | 0.9<br>28<br>56<br>33<br>9  | -<br>0.0<br>24<br>77<br>03<br>39 | 0.9<br>94<br>47<br>94<br>74 | d__Bacteroidia | p__Actinobacteriota | c__Coriobacteriia | o__Coriobacteriales   | f__Coriobacteriaceae   | g__Collinsella     | s__Collinsella unknown_9     |
| MGYG-HGUT-00233:s__CAG-81 sp900066785        | 0.2<br>81<br>64<br>43<br>04 | 0.3<br>01<br>30<br>53<br>87      | 0.9<br>29<br>02<br>59<br>13 | d__Bacteroidia | p__Firmicutes_A     | c__Clostridia     | o__Lachnospirales     | f__Lachnospiraceae     | g__CAG-81          | s__CAG-81 sp900066785        |

|                                                 |                             |                                  |                             |                             |                                 |                                        |                                   |                                          |                        |                                        |
|-------------------------------------------------|-----------------------------|----------------------------------|-----------------------------|-----------------------------|---------------------------------|----------------------------------------|-----------------------------------|------------------------------------------|------------------------|----------------------------------------|
| MGYG-HGUT-00235:s__Enterobacter kobei           | 0.4<br>91<br>34<br>96<br>92 | 0.1<br>82<br>96<br>24<br>96      | 0.9<br>68<br>53<br>20<br>73 | d_<br>_B<br>act<br>eri<br>a | p__Pr<br>oteob<br>acteri<br>a   | c__Ga<br>mmap<br>roteo<br>bacter<br>ia | o__Ent<br>erobac<br>terales       | f__Ente<br>robacte<br>riaceae            | g__Entero<br>bacter    | s__Enterobac<br>ter kobei              |
| MGYG-HGUT-00236:s__Bacteroides fragilis_A       | 0.0<br>99<br>35<br>77<br>26 | -<br>0.4<br>55<br>26<br>38<br>31 | 0.8<br>83<br>30<br>72<br>56 | d_<br>_B<br>act<br>eri<br>a | p__B<br>acter<br>oidot<br>a     | c__Ba<br>cteroi<br>dia                 | o__Bac<br>teroida<br>les          | f__Bact<br>eroidac<br>eae                | g__Bacter<br>oides     | s__Bacteroides<br>fragilis_A           |
| MGYG-HGUT-00237:s__Collinsella unknown_10       | 0.9<br>15<br>73<br>72<br>47 | -<br>0.0<br>28<br>28<br>84<br>39 | 0.9<br>94<br>47<br>94<br>74 | d_<br>_B<br>act<br>eri<br>a | p__A<br>ctino<br>bacte<br>riota | c__Co<br>riobac<br>teriia              | o__Cor<br>iobact<br>eriales       | f__Cori<br>obacteri<br>aceae             | g__Collins<br>ella     | s__Collinsella<br>unknown_10           |
| MGYG-HGUT-00238:s__Enterococcus_D casseliflavus | 0.4<br>96<br>70<br>19<br>26 | -<br>0.1<br>87<br>47<br>48<br>2  | 0.9<br>68<br>53<br>20<br>73 | d_<br>_B<br>act<br>eri<br>a | p__Fi<br>rmicu<br>tes           | c__Ba<br>cilli                         | o__Lac<br>tobacill<br>ales        | f__Ente<br>rococca<br>ceae               | g__Entero<br>coccus_D  | s__Enterococ<br>cus_D<br>casseliflavus |
| MGYG-HGUT-00239:s__Collinsella unknown_11       | 0.1<br>03<br>21<br>68<br>62 | 0.4<br>40<br>05<br>83<br>63      | 0.8<br>83<br>30<br>72<br>56 | d_<br>_B<br>act<br>eri<br>a | p__A<br>ctino<br>bacte<br>riota | c__Co<br>riobac<br>teriia              | o__Cor<br>iobact<br>eriales       | f__Cori<br>obacteri<br>aceae             | g__Collins<br>ella     | s__Collinsella<br>unknown_11           |
| MGYG-HGUT-00240:s__Absiella unknown_2           | 0.5<br>77<br>88<br>29<br>45 | -<br>0.1<br>53<br>71<br>63<br>18 | 0.9<br>75<br>67<br>17<br>57 | d_<br>_B<br>act<br>eri<br>a | p__Fi<br>rmicu<br>tes           | c__Ba<br>cilli                         | o__Ery<br>sipelot<br>richale<br>s | f__Erysi<br>pelotric<br>haceae           | g__Absiell<br>a        | s__Absiella<br>unknown_2               |
| MGYG-HGUT-00242:s__Clostridium_M sp000431375    | 0.9<br>05<br>05<br>57<br>57 | 0.0<br>33<br>10<br>98<br>56      | 0.9<br>94<br>47<br>94<br>74 | d_<br>_B<br>act<br>eri<br>a | p__Fi<br>rmicu<br>tes_A         | c__Clo<br>stridia                      | o__Lac<br>hnospi<br>rales         | f__Lach<br>nospirac<br>eae               | g__Clostri<br>dium_M   | s__Clostridiu<br>m_M<br>sp000431375    |
| MGYG-HGUT-00243:s__Bacteroides_B massiliensis   | 0.9<br>02<br>95<br>82<br>08 | 0.0<br>33<br>99<br>99<br>18      | 0.9<br>94<br>47<br>94<br>74 | d_<br>_B<br>act<br>eri<br>a | p__B<br>acter<br>oidot<br>a     | c__Ba<br>cteroi<br>dia                 | o__Bac<br>teroida<br>les          | f__Bact<br>eroidac<br>eae                | g__Bacter<br>oides_B   | s__Bacteroides<br>_B<br>massiliensis   |
| MGYG-HGUT-00244:s__Catenibacterium sp000437715  | 0.7<br>74<br>79             | 0.0<br>78<br>30                  | 0.9<br>79<br>52             | d_<br>_B<br>act             | p__Fi<br>rmicu<br>tes           | c__Ba<br>cilli                         | o__Ery<br>sipelot<br>richale<br>s | f__Erysi<br>pelatocl<br>ostridia<br>ceae | g__Cateni<br>bacterium | s__Catenibact<br>erium<br>sp000437715  |

|                                                  |                             |                                  |                             |                             |                         |                        |                                   |                                |                         |                                               |
|--------------------------------------------------|-----------------------------|----------------------------------|-----------------------------|-----------------------------|-------------------------|------------------------|-----------------------------------|--------------------------------|-------------------------|-----------------------------------------------|
|                                                  | 93<br>29                    | 36<br>99                         | 04<br>84                    | eri<br>a                    |                         |                        |                                   |                                |                         |                                               |
| MGYG-HGUT-00245:s__Roseburia unknown_1           | 0.0<br>41<br>57<br>96<br>06 | 0.5<br>54<br>55<br>57<br>46      | 0.7<br>79<br>32<br>10<br>52 | d_<br>_B<br>act<br>eri<br>a | p__Fi<br>rmicu<br>tes_A | c__Clo<br>stridia      | o__Lac<br>hnospi<br>rales         | f__Lach<br>nospi<br>rac<br>eae | g__Rosebu<br>ria        | s__Roseburia<br>unknown_1                     |
| MGYG-HGUT-00246:s__Streptococcus pasteurianus    | 0.3<br>95<br>46<br>02<br>6  | -<br>0.2<br>35<br>25<br>15<br>76 | 0.9<br>39<br>70<br>92<br>5  | d_<br>_B<br>act<br>eri<br>a | p__Fi<br>rmicu<br>tes   | c__Ba<br>cilli         | o__Lac<br>tobacill<br>ales        | f__Stre<br>ptococc<br>aceae    | g__Strepto<br>coccus    | s__Streptococ<br>cus<br>pasteurianus          |
| MGYG-HGUT-00248:s__Weissella cibaria             | 0.3<br>64<br>82<br>33<br>66 | -<br>0.2<br>44<br>92<br>89<br>12 | 0.9<br>39<br>70<br>92<br>5  | d_<br>_B<br>act<br>eri<br>a | p__Fi<br>rmicu<br>tes   | c__Ba<br>cilli         | o__Lac<br>tobacill<br>ales        | f__Lact<br>obacilla<br>ceae    | g__Weisse<br>lla        | s__Weissella<br>cibaria                       |
| MGYG-HGUT-00249:s__Faecalibacterium faecis       | 0.0<br>34<br>47<br>09<br>05 | 0.5<br>73<br>26<br>25<br>06      | 0.7<br>68<br>22<br>58<br>34 | d_<br>_B<br>act<br>eri<br>a | p__Fi<br>rmicu<br>tes_A | c__Clo<br>stridia      | o__Lac<br>hnospi<br>rales         | f__Lach<br>nospi<br>rac<br>eae | g__Faecali<br>catena    | s__Faecalicat<br>ena faecis                   |
| MGYG-HGUT-00250:s__TF01-11 sp001414325           | 0.5<br>27<br>41<br>95<br>93 | -<br>0.1<br>75<br>21<br>19<br>33 | 0.9<br>68<br>53<br>20<br>73 | d_<br>_B<br>act<br>eri<br>a | p__Fi<br>rmicu<br>tes_A | c__Clo<br>stridia      | o__Lac<br>hnospi<br>rales         | f__Lach<br>nospi<br>rac<br>eae | g__TF01-<br>11          | s__TF01-11<br>sp001414325                     |
| MGYG-HGUT-00251:s__Fusicatibacter saccharivorans | 0.0<br>46<br>12<br>35<br>09 | 0.5<br>08<br>16<br>03<br>11      | 0.7<br>99<br>66<br>70<br>98 | d_<br>_B<br>act<br>eri<br>a | p__Fi<br>rmicu<br>tes_A | c__Clo<br>stridia      | o__Lac<br>hnospi<br>rales         | f__Lach<br>nospi<br>rac<br>eae | g__Fusicat<br>enibacter | s__Fusicateni<br>bacter<br>saccharivoran<br>s |
| MGYG-HGUT-00252:s__Blautia_A obeum_B             | 0.6<br>26<br>10<br>26<br>62 | 0.1<br>31<br>56<br>79<br>95      | 0.9<br>75<br>67<br>17<br>57 | d_<br>_B<br>act<br>eri<br>a | p__Fi<br>rmicu<br>tes_A | c__Clo<br>stridia      | o__Lac<br>hnospi<br>rales         | f__Lach<br>nospi<br>rac<br>eae | g__Blautia<br>_A        | s__Blautia_A<br>obeum_B                       |
| MGYG-HGUT-00253:s__Holdemanelle sp002299315      | 0.6<br>01<br>10<br>75<br>3  | 0.1<br>42<br>98<br>64<br>64      | 0.9<br>75<br>67<br>17<br>57 | d_<br>_B<br>act<br>eri<br>a | p__Fi<br>rmicu<br>tes   | c__Ba<br>cilli         | o__Ery<br>sipelot<br>richale<br>s | f__Erysi<br>pelotric<br>haceae | g__Holde<br>manella     | s__Holdeman<br>ella<br>sp002299315            |
| MGYG-HGUT-00254:s__Odoribacter splanchnicus      | 0.2<br>39<br>24             | 0.3<br>24<br>30                  | 0.9<br>02<br>18             | d_<br>_B<br>act             | p__B<br>acter           | c__Ba<br>cteroi<br>dia | o__Bac<br>teroida<br>les          | f__Mari<br>nifilacea<br>e      | g__Odorib<br>acter      | s__Odoribact<br>er<br>splanchnicus            |

|                                              |                             |                                  |                             |                             |                                 |                           |                             |                                |                       |                                     |
|----------------------------------------------|-----------------------------|----------------------------------|-----------------------------|-----------------------------|---------------------------------|---------------------------|-----------------------------|--------------------------------|-----------------------|-------------------------------------|
|                                              | 86<br>38                    | 87<br>48                         | 13<br>67                    | eri<br>a                    | oidot<br>a                      |                           |                             |                                |                       |                                     |
| MGYG-HGUT-00255:s__CAG-81 sp900066055        | 0.3<br>59<br>76<br>50<br>18 | 0.2<br>51<br>78<br>62<br>56      | 0.9<br>39<br>70<br>92<br>5  | d_<br>_B<br>act<br>eri<br>a | p__Fi<br>rmicu<br>tes_A         | c__Clo<br>stridia         | o__Lac<br>hnospi<br>rales   | f__Lach<br>nospi<br>rac<br>eae | g__CAG-<br>81         | s__CAG-81<br>sp900066055            |
| MGYG-HGUT-00256:s__Olsenella_B sp000752675   | 0.7<br>72<br>44<br>24<br>32 | 0.0<br>80<br>84<br>59<br>33      | 0.9<br>79<br>52<br>04<br>84 | d_<br>_B<br>act<br>eri<br>a | p__A<br>ctino<br>bacte<br>riota | c__Co<br>riobac<br>teriia | o__Cor<br>iobact<br>eriales | f__Atop<br>obiacea<br>e        | g__Olsenel<br>la_B    | s__Olsenella_<br>B<br>sp000752675   |
| MGYG-HGUT-00257:s__Collinsella sp002232035_5 | 0.1<br>56<br>68<br>33<br>33 | 0.3<br>89<br>21<br>82<br>55      | 0.8<br>91<br>82<br>55<br>59 | d_<br>_B<br>act<br>eri<br>a | p__A<br>ctino<br>bacte<br>riota | c__Co<br>riobac<br>teriia | o__Cor<br>iobact<br>eriales | f__Cori<br>obacteri<br>aceae   | g__Collins<br>ella    | s__Collinsella<br>sp002232035<br>_5 |
| MGYG-HGUT-00258:s__Ruminococcus_E bromii_B   | 0.4<br>74<br>17<br>62<br>6  | 0.1<br>96<br>76<br>96<br>89      | 0.9<br>68<br>53<br>20<br>73 | d_<br>_B<br>act<br>eri<br>a | p__Fi<br>rmicu<br>tes_A         | c__Clo<br>stridia         | o__Os<br>cillospi<br>rales  | f__Acut<br>alibacte<br>raceae  | g__Rumin<br>ococcus_E | s__Ruminoco<br>ccus_E<br>bromii_B   |
| MGYG-HGUT-00259:s__UBA9502 unknown_2         | 0.0<br>91<br>54<br>35       | 0.4<br>58<br>46<br>61<br>91      | 0.8<br>83<br>30<br>72<br>56 | d_<br>_B<br>act<br>eri<br>a | p__Fi<br>rmicu<br>tes_A         | c__Clo<br>stridia         | o__Lac<br>hnospi<br>rales   | f__Lach<br>nospi<br>rac<br>eae | g__UBA95<br>02        | s__UBA9502<br>unknown_2             |
| MGYG-HGUT-00261:s__Collinsella unknown_13    | 0.0<br>19<br>85<br>92<br>72 | 0.6<br>33<br>73<br>22<br>78      | 0.7<br>68<br>22<br>58<br>34 | d_<br>_B<br>act<br>eri<br>a | p__A<br>ctino<br>bacte<br>riota | c__Co<br>riobac<br>teriia | o__Cor<br>iobact<br>eriales | f__Cori<br>obacteri<br>aceae   | g__Collins<br>ella    | s__Collinsella<br>unknown_13        |
| MGYG-HGUT-00262:s__Eubacterium_E hallii      | 0.3<br>40<br>30<br>19<br>27 | 0.2<br>66<br>14<br>55<br>27      | 0.9<br>34<br>13<br>14<br>03 | d_<br>_B<br>act<br>eri<br>a | p__Fi<br>rmicu<br>tes_A         | c__Clo<br>stridia         | o__Lac<br>hnospi<br>rales   | f__Lach<br>nospi<br>rac<br>eae | g__Eubact<br>erium_E  | s__Eubacteriu<br>m_E hallii         |
| MGYG-HGUT-00263:s__Blautia_A sp900066335     | 0.3<br>58<br>24<br>46<br>94 | 0.2<br>56<br>56<br>56<br>34      | 0.9<br>39<br>70<br>92<br>5  | d_<br>_B<br>act<br>eri<br>a | p__Fi<br>rmicu<br>tes_A         | c__Clo<br>stridia         | o__Lac<br>hnospi<br>rales   | f__Lach<br>nospi<br>rac<br>eae | g__Blautia<br>_A      | s__Blautia_A<br>sp900066335         |
| MGYG-HGUT-00265:s__Bacteroides nordii        | 0.3<br>02<br>05<br>07<br>14 | -<br>0.2<br>87<br>94<br>60<br>03 | 0.9<br>29<br>02<br>59<br>13 | d_<br>_B<br>act<br>eri<br>a | p__B<br>acter<br>oidot<br>a     | c__Ba<br>cteroi<br>dia    | o__Bac<br>teroida<br>les    | f__Bact<br>eroidac<br>eae      | g__Bacter<br>oides    | s__Bacteroi<br>des nordii           |

|                                                     |                             |                                  |                             |                             |                                 |                           |                                   |                                          |                                   |                                            |
|-----------------------------------------------------|-----------------------------|----------------------------------|-----------------------------|-----------------------------|---------------------------------|---------------------------|-----------------------------------|------------------------------------------|-----------------------------------|--------------------------------------------|
| MGYG-HGUT-00266:s__Collinsella sp002232035_6        | 0.0<br>34<br>29<br>49       | 0.5<br>82<br>78<br>49<br>22      | 0.7<br>68<br>22<br>58<br>34 | d_<br>_B<br>act<br>eri<br>a | p__A<br>ctino<br>bacte<br>riota | c__Co<br>riobac<br>teriia | o__Cor<br>iobact<br>eriales       | f__Cori<br>obacteri<br>aceae             | g__Collins<br>ella                | s__Collinsella<br>sp002232035<br>_6        |
| MGYG-HGUT-00267:s__CAG-536 sp000434355              | 0.4<br>43<br>90<br>29<br>95 | -<br>0.2<br>12<br>32<br>56<br>22 | 0.9<br>60<br>63<br>01<br>16 | d_<br>_B<br>act<br>eri<br>a | p__Fi<br>rmicu<br>tes           | c__Ba<br>cilli            | o__Ery<br>sipelot<br>richale<br>s | f__Erysi<br>pelotric<br>haceae           | g__CAG-<br>536                    | s__CAG-536<br>sp000434355                  |
| MGYG-HGUT-00268:s__Faecalibacterium sp900066545     | 0.1<br>43<br>93<br>21<br>78 | 0.4<br>00<br>54<br>74<br>18      | 0.8<br>91<br>82<br>55<br>59 | d_<br>_B<br>act<br>eri<br>a | p__Fi<br>rmicu<br>tes_A         | c__Clo<br>stridia         | o__Lac<br>hnospi<br>rales         | f__Lach<br>nospirac<br>eae               | g__Faecali<br>catena              | s__Faecalicat<br>ena<br>sp900066545        |
| MGYG-HGUT-00269:s__Erysipelatoclostridium unknown_1 | 0.3<br>16<br>89<br>90<br>93 | 0.2<br>70<br>97<br>67<br>21      | 0.9<br>29<br>02<br>59<br>13 | d_<br>_B<br>act<br>eri<br>a | p__Fi<br>rmicu<br>tes           | c__Ba<br>cilli            | o__Ery<br>sipelot<br>richale<br>s | f__Erysi<br>pelatocl<br>ostridia<br>ceae | g__Erysipe<br>latoclostri<br>dium | s__Erysipelat<br>oclostridium<br>unknown_1 |
| MGYG-HGUT-00270:s__Collinsella unknown_14           | 0.2<br>41<br>11<br>14<br>72 | 0.3<br>24<br>73<br>60<br>97      | 0.9<br>02<br>18<br>13<br>67 | d_<br>_B<br>act<br>eri<br>a | p__A<br>ctino<br>bacte<br>riota | c__Co<br>riobac<br>teriia | o__Cor<br>iobact<br>eriales       | f__Cori<br>obacteri<br>aceae             | g__Collins<br>ella                | s__Collinsella<br>unknown_14               |
| MGYG-HGUT-00271:s__Roseburia inulinivorans          | 0.2<br>82<br>25<br>91<br>22 | 0.2<br>80<br>03<br>45<br>17      | 0.9<br>29<br>02<br>59<br>13 | d_<br>_B<br>act<br>eri<br>a | p__Fi<br>rmicu<br>tes_A         | c__Clo<br>stridia         | o__Lac<br>hnospi<br>rales         | f__Lach<br>nospirac<br>eae               | g__Rosebu<br>ria                  | s__Roseburia<br>inulinivorans              |
| MGYG-HGUT-00272:s__Prevotella sp000434515           | 0.5<br>97<br>14<br>28<br>49 | 0.1<br>40<br>80<br>95<br>41      | 0.9<br>75<br>67<br>17<br>57 | d_<br>_B<br>act<br>eri<br>a | p__B<br>acter<br>oidot<br>a     | c__Ba<br>cteroi<br>dia    | o__Bac<br>teroida<br>les          | f__Bact<br>eroidac<br>eae                | g__Prevot<br>ella                 | s__Prevotella<br>sp000434515               |
| MGYG-HGUT-00273:s__Bacteroides_A coprophilus        | 0.4<br>99<br>56<br>51<br>93 | -<br>0.1<br>89<br>55<br>72<br>6  | 0.9<br>68<br>53<br>20<br>73 | d_<br>_B<br>act<br>eri<br>a | p__B<br>acter<br>oidot<br>a     | c__Ba<br>cteroi<br>dia    | o__Bac<br>teroida<br>les          | f__Bact<br>eroidac<br>eae                | g__Bacter<br>oides_A              | s__Bacteroides<br>_A<br>coprophilus        |
| MGYG-HGUT-00274:s__UBA9502 sp003506385              | 0.0<br>71<br>48<br>49<br>92 | 0.4<br>99<br>64<br>66<br>44      | 0.8<br>77<br>82<br>62<br>47 | d_<br>_B<br>act<br>eri<br>a | p__Fi<br>rmicu<br>tes_A         | c__Clo<br>stridia         | o__Lac<br>hnospi<br>rales         | f__Lach<br>nospirac<br>eae               | g__UBA95<br>02                    | s__UBA9502<br>sp003506385                  |

|                                                      |                             |                                  |                             |                             |                                 |                           |                             |                              |                                   |                                                |
|------------------------------------------------------|-----------------------------|----------------------------------|-----------------------------|-----------------------------|---------------------------------|---------------------------|-----------------------------|------------------------------|-----------------------------------|------------------------------------------------|
| MGYG-HGUT-00275:s__Collinsella sp002232035_7         | 0.1<br>46<br>36<br>05<br>76 | 0.3<br>99<br>04<br>73<br>46      | 0.8<br>91<br>82<br>55<br>59 | d_<br>_B<br>act<br>eri<br>a | p__A<br>ctino<br>bacte<br>riota | c__Co<br>riobac<br>teriia | o__Cor<br>iobact<br>eriales | f__Cori<br>obacteri<br>aceae | g__Collins<br>ella                | s__Collinsella<br>sp002232035<br>_7            |
| MGYG-HGUT-00276:s__Caecibacter unknown_1             | 0.6<br>51<br>29<br>12<br>14 | 0.1<br>27<br>01<br>35<br>53      | 0.9<br>75<br>67<br>17<br>57 | d_<br>_B<br>act<br>eri<br>a | p__Fi<br>rmicu<br>tes_C         | c__Ne<br>gativic<br>utes  | o__Vei<br>llonella<br>les   | f__Meg<br>asphaer<br>aceae   | g__Caecib<br>acter                | s__Caecibact<br>er<br>unknown_1                |
| MGYG-HGUT-00277:s__Streptococcus mutans              | 0.3<br>24<br>02<br>73<br>14 | 0.2<br>76<br>51<br>83<br>32      | 0.9<br>30<br>62<br>46<br>92 | d_<br>_B<br>act<br>eri<br>a | p__Fi<br>rmicu<br>tes           | c__Ba<br>cilli            | o__Lac<br>tobacill<br>ales  | f__Stre<br>ptococc<br>aceae  | g__Strepto<br>coccus              | s__Streptococ<br>cus mutans                    |
| MGYG-HGUT-00278:s__Hungatella_A unknown_1            | 0.4<br>06<br>60<br>16<br>05 | 0.2<br>31<br>89<br>01<br>89      | 0.9<br>39<br>70<br>92<br>5  | d_<br>_B<br>act<br>eri<br>a | p__Fi<br>rmicu<br>tes_A         | c__Clo<br>stridia         | o__Lac<br>hnospi<br>rales   | f__Lach<br>nospirac<br>eae   | g__Hungat<br>ella_A               | s__Hungatella<br>_A<br>unknown_1               |
| MGYG-HGUT-00280:s__Lachnospiraceae unknown unknown_5 | 0.8<br>49<br>06<br>40<br>66 | -<br>0.0<br>50<br>12<br>84<br>71 | 0.9<br>92<br>87<br>80<br>88 | d_<br>_B<br>act<br>eri<br>a | p__Fi<br>rmicu<br>tes_A         | c__Clo<br>stridia         | o__Lac<br>hnospi<br>rales   | f__Lach<br>nospirac<br>eae   | g__Lachno<br>spiraceae<br>unknown | s__Lachnospir<br>aceae<br>unknown<br>unknown_5 |
| MGYG-HGUT-00282:s__TF01-11 sp003524945               | 0.1<br>15<br>82<br>24<br>49 | 0.4<br>38<br>26<br>44<br>31      | 0.8<br>83<br>30<br>72<br>56 | d_<br>_B<br>act<br>eri<br>a | p__Fi<br>rmicu<br>tes_A         | c__Clo<br>stridia         | o__Lac<br>hnospi<br>rales   | f__Lach<br>nospirac<br>eae   | g__TF01-<br>11                    | s__TF01-11<br>sp003524945                      |
| MGYG-HGUT-00285:s__UBA7185 unknown_1                 | 0.9<br>60<br>81<br>78<br>51 | 0.0<br>13<br>65<br>26<br>94      | 0.9<br>94<br>47<br>94<br>74 | d_<br>_B<br>act<br>eri<br>a | p__Fi<br>rmicu<br>tes_B         | c__Pe<br>ptococ<br>cia    | o__Pe<br>ptococ<br>cales    | f__Pept<br>ococcac<br>eae    | g__UBA71<br>85                    | s__UBA7185<br>unknown_1                        |
| MGYG-HGUT-00287:s__Robinsoniella unknown_1           | 0.1<br>64<br>63<br>12<br>99 | -<br>0.3<br>80<br>87<br>15<br>96 | 0.8<br>91<br>82<br>55<br>59 | d_<br>_B<br>act<br>eri<br>a | p__Fi<br>rmicu<br>tes_A         | c__Clo<br>stridia         | o__Lac<br>hnospi<br>rales   | f__Lach<br>nospirac<br>eae   | g__Robins<br>oniella              | s__Robinsoni<br>ella<br>unknown_1              |
| MGYG-HGUT-00290:s__Collinsella unknown_17            | 0.4<br>51<br>02<br>66<br>48 | 0.2<br>01<br>93<br>16<br>28      | 0.9<br>61<br>29<br>22<br>08 | d_<br>_B<br>act<br>eri<br>a | p__A<br>ctino<br>bacte<br>riota | c__Co<br>riobac<br>teriia | o__Cor<br>iobact<br>eriales | f__Cori<br>obacteri<br>aceae | g__Collins<br>ella                | s__Collinsella<br>unknown_17                   |

|                                             |                             |                                  |                             |                             |                                 |                           |                             |                               |                       |                                    |
|---------------------------------------------|-----------------------------|----------------------------------|-----------------------------|-----------------------------|---------------------------------|---------------------------|-----------------------------|-------------------------------|-----------------------|------------------------------------|
| MGYG-HGUT-00291:s__CAG-1427 unknown_1       | 0.3<br>97<br>26<br>36<br>27 | 0.2<br>35<br>70<br>82<br>25      | 0.9<br>39<br>70<br>92<br>5  | d_<br>_B<br>act<br>eri<br>a | p__A<br>ctino<br>bacte<br>riota | c__Co<br>riobac<br>teriia | o__Cor<br>iobact<br>eriales | f__Egge<br>rthellac<br>eae    | g__CAG-<br>1427       | s__CAG-1427<br>unknown_1           |
| MGYG-HGUT-00292:s__Collinsella unknown_18   | 0.3<br>28<br>74<br>28<br>09 | 0.2<br>72<br>69<br>31<br>28      | 0.9<br>30<br>62<br>46<br>92 | d_<br>_B<br>act<br>eri<br>a | p__A<br>ctino<br>bacte<br>riota | c__Co<br>riobac<br>teriia | o__Cor<br>iobact<br>eriales | f__Cori<br>obacteri<br>aceae  | g__Collins<br>ella    | s__Collinsella<br>unknown_18       |
| MGYG-HGUT-00298:s__Streptococcus unknown_3  | 0.6<br>05<br>44<br>36<br>28 | 0.1<br>44<br>68<br>48<br>58      | 0.9<br>75<br>67<br>17<br>57 | d_<br>_B<br>act<br>eri<br>a | p__Fi<br>rmicu<br>tes           | c__Ba<br>cilli            | o__Lac<br>tobacill<br>ales  | f__Stre<br>ptococc<br>aceae   | g__Strepto<br>coccus  | s__Streptococ<br>cus<br>unknown_3  |
| MGYG-HGUT-00301:s__Blautia_A unknown_5      | 0.8<br>48<br>75<br>68<br>84 | -<br>0.0<br>53<br>15<br>81<br>76 | 0.9<br>92<br>87<br>80<br>88 | d_<br>_B<br>act<br>eri<br>a | p__Fi<br>rmicu<br>tes_A         | c__Clo<br>stridia         | o__Lac<br>hnospi<br>rales   | f__Lach<br>nospirac<br>eae    | g__Blautia<br>_A      | s__Blautia_A<br>unknown_5          |
| MGYG-HGUT-00306:s__Collinsella sp003487125  | 0.2<br>84<br>17<br>77<br>08 | 0.2<br>90<br>02<br>86<br>75      | 0.9<br>29<br>02<br>59<br>13 | d_<br>_B<br>act<br>eri<br>a | p__A<br>ctino<br>bacte<br>riota | c__Co<br>riobac<br>teriia | o__Cor<br>iobact<br>eriales | f__Cori<br>obacteri<br>aceae  | g__Collins<br>ella    | s__Collinsella<br>sp003487125      |
| MGYG-HGUT-00308:s__Pauljensenia keddieii    | 0.2<br>24<br>38<br>11<br>24 | 0.3<br>28<br>74<br>42<br>31      | 0.8<br>91<br>82<br>55<br>59 | d_<br>_B<br>act<br>eri<br>a | p__A<br>ctino<br>bacte<br>riota | c__Ac<br>tinoba<br>cteria | o__Act<br>inomyc<br>etales  | f__Actin<br>omycet<br>aceae   | g__Pauljen<br>senia   | s__Pauljense<br>nia keddieii       |
| MGYG-HGUT-00312:s__Eisenbergiella unknown_1 | 0.6<br>04<br>61<br>80<br>61 | -<br>0.1<br>45<br>49<br>60<br>43 | 0.9<br>75<br>67<br>17<br>57 | d_<br>_B<br>act<br>eri<br>a | p__Fi<br>rmicu<br>tes_A         | c__Clo<br>stridia         | o__Lac<br>hnospi<br>rales   | f__Lach<br>nospirac<br>eae    | g__Eisenb<br>ergiella | s__Eisenbergi<br>ella<br>unknown_1 |
| MGYG-HGUT-00314:s__Collinsella unknown_20   | 0.4<br>68<br>12<br>72<br>86 | -<br>0.1<br>98<br>95<br>85<br>45 | 0.9<br>68<br>19<br>40<br>79 | d_<br>_B<br>act<br>eri<br>a | p__A<br>ctino<br>bacte<br>riota | c__Co<br>riobac<br>teriia | o__Cor<br>iobact<br>eriales | f__Cori<br>obacteri<br>aceae  | g__Collins<br>ella    | s__Collinsella<br>unknown_20       |
| MGYG-HGUT-00316:s__UBA945 unknown           | 0.5<br>46<br>58<br>16<br>99 | 0.1<br>67<br>92<br>96<br>77      | 0.9<br>68<br>53<br>20<br>73 | d_<br>_B<br>act<br>eri<br>a | p__Fi<br>rmicu<br>tes_A         | c__Clo<br>stridia         | o__Os<br>cillospi<br>rales  | f__Acut<br>alibacte<br>raceae | g__UBA94<br>5         | s__UBA945<br>unknown               |

|                                                      |                             |                                  |                             |                             |                                 |                           |                             |                               |                                   |                                                |
|------------------------------------------------------|-----------------------------|----------------------------------|-----------------------------|-----------------------------|---------------------------------|---------------------------|-----------------------------|-------------------------------|-----------------------------------|------------------------------------------------|
| MGYG-HGUT-00318:s__Streptococcus infantis_I          | 0.1<br>62<br>80<br>89<br>84 | 0.3<br>88<br>79<br>40<br>33      | 0.8<br>91<br>82<br>55<br>59 | d_<br>_B<br>act<br>eri<br>a | p__Fi<br>rmicu<br>tes           | c__Ba<br>cilli            | o__Lac<br>tobacill<br>ales  | f__Stre<br>ptococc<br>aceae   | g__Strepto<br>coccus              | s__Streptococ<br>cus infantis_I                |
| MGYG-HGUT-00320:s__Collinsella unknown_21            | 0.2<br>55<br>24<br>78<br>52 | 0.3<br>07<br>99<br>46<br>4       | 0.9<br>05<br>01<br>56<br>96 | d_<br>_B<br>act<br>eri<br>a | p__A<br>ctino<br>bacte<br>riota | c__Co<br>riobac<br>teriia | o__Cor<br>iobact<br>eriales | f__Cori<br>obacteri<br>aceae  | g__Collins<br>ella                | s__Collinsella<br>unknown_21                   |
| MGYG-HGUT-00321:s__Collinsella unknown_22            | 0.5<br>37<br>01<br>41<br>95 | 0.1<br>71<br>74<br>24<br>61      | 0.9<br>68<br>53<br>20<br>73 | d_<br>_B<br>act<br>eri<br>a | p__A<br>ctino<br>bacte<br>riota | c__Co<br>riobac<br>teriia | o__Cor<br>iobact<br>eriales | f__Cori<br>obacteri<br>aceae  | g__Collins<br>ella                | s__Collinsella<br>unknown_22                   |
| MGYG-HGUT-00324:s__Collinsella unknown_23            | 0.0<br>04<br>48<br>85<br>27 | 0.7<br>70<br>30<br>95<br>21      | 0.6<br>68<br>41<br>64<br>33 | d_<br>_B<br>act<br>eri<br>a | p__A<br>ctino<br>bacte<br>riota | c__Co<br>riobac<br>teriia | o__Cor<br>iobact<br>eriales | f__Cori<br>obacteri<br>aceae  | g__Collins<br>ella                | s__Collinsella<br>unknown_23                   |
| MGYG-HGUT-00325:s__CAG-95 unknown_1                  | 0.9<br>41<br>51<br>99<br>06 | 0.0<br>19<br>84<br>36<br>78      | 0.9<br>94<br>47<br>94<br>74 | d_<br>_B<br>act<br>eri<br>a | p__Fi<br>rmicu<br>tes_A         | c__Clo<br>stridia         | o__Lac<br>hnospi<br>rales   | f__Lach<br>nospirac<br>eae    | g__CAG-<br>95                     | s__CAG-95<br>unknown_1                         |
| MGYG-HGUT-00328:s__CAG-272 unknown                   | 0.9<br>65<br>67<br>33<br>33 | -<br>0.0<br>11<br>62<br>27<br>43 | 0.9<br>94<br>47<br>94<br>74 | d_<br>_B<br>act<br>eri<br>a | p__Fi<br>rmicu<br>tes_A         | c__Clo<br>stridia         | o__Os<br>cillospi<br>rales  | f__CAG-<br>272                | g__CAG-<br>272                    | s__CAG-272<br>unknown                          |
| MGYG-HGUT-00340:s__Clostridium_E unknown             | 0.3<br>39<br>26<br>19<br>46 | 0.2<br>64<br>98<br>97<br>37      | 0.9<br>32<br>70<br>93<br>82 | d_<br>_B<br>act<br>eri<br>a | p__Fi<br>rmicu<br>tes_A         | c__Clo<br>stridia         | o__Os<br>cillospi<br>rales  | f__Acut<br>alibacte<br>raceae | g__Clostri<br>dium_E              | s__Clostridiu<br>m_E<br>unknown                |
| MGYG-HGUT-00343:s__Odoribacter unknown_2             | 0.7<br>03<br>92<br>79<br>59 | -<br>0.1<br>04<br>33<br>65<br>07 | 0.9<br>79<br>45<br>84<br>75 | d_<br>_B<br>act<br>eri<br>a | p__B<br>acter<br>oidot<br>a     | c__Ba<br>cteroi<br>dia    | o__Bac<br>teroida<br>les    | f__Mari<br>nifilacea<br>e     | g__Odorib<br>acter                | s__Odoribact<br>er<br>unknown_2                |
| MGYG-HGUT-00346:s__Lachnospiraceae unknown unknown_6 | 0.6<br>08<br>06<br>41<br>28 | -<br>0.1<br>43<br>36<br>25<br>09 | 0.9<br>75<br>67<br>17<br>57 | d_<br>_B<br>act<br>eri<br>a | p__Fi<br>rmicu<br>tes_A         | c__Clo<br>stridia         | o__Lac<br>hnospi<br>rales   | f__Lach<br>nospirac<br>eae    | g__Lachno<br>spiraceae<br>unknown | s__Lachnospi<br>raceae<br>unknown<br>unknown_6 |



|                                              |                         |                              |                         |                  |                  |                |                    |                     |                    |                              |
|----------------------------------------------|-------------------------|------------------------------|-------------------------|------------------|------------------|----------------|--------------------|---------------------|--------------------|------------------------------|
| MGYG-HGUT-00355:s__Parabacteroides unknown_4 | 0.649<br>43<br>45<br>22 | -<br>0.127<br>57<br>17<br>64 | 0.975<br>67<br>17<br>57 | d__Bacteroidetes | p__Bacteroidetes | c__Bacteroidia | o__Bacteroidales   | f__Tannerellaceae   | g__Parabacteroides | s__Parabacteroides unknown_4 |
| MGYG-HGUT-00356:s__Lachnospirillum unknown   | 0.121<br>92<br>96<br>78 | 0.427<br>24<br>05<br>89      | 0.885<br>74<br>21<br>75 | d__Bacteroidetes | p__Firmicutes    | c__Clostridia  | o__Lachnospirales  | f__Lachnospiraceae  | g__Lachnospirillum | s__Lachnospirillum unknown   |
| MGYG-HGUT-00359:s__UBA7182 unknown_1         | 0.043<br>61<br>05<br>79 | 0.550<br>00<br>16<br>08      | 0.779<br>32<br>10<br>52 | d__Bacteroidetes | p__Firmicutes    | c__Clostridia  | o__Lachnospirales  | f__Lachnospiraceae  | g__UBA7182         | s__UBA7182 unknown_1         |
| MGYG-HGUT-00361:s__SZUA-378 unknown_1        | 0.293<br>21<br>45<br>21 | 0.284<br>20<br>68<br>13      | 0.929<br>02<br>59<br>13 | d__Bacteroidetes | p__Firmicutes    | c__Clostridia  | o__Lachnospirales  | f__Lachnospiraceae  | g__SZUA-378        | s__SZUA-378 unknown_1        |
| MGYG-HGUT-00364:s__Coproccoccus unknown_1    | 0.262<br>76<br>42<br>08 | 0.304<br>35<br>80<br>31      | 0.913<br>13<br>14<br>21 | d__Bacteroidetes | p__Firmicutes    | c__Clostridia  | o__Lachnospirales  | f__Lachnospiraceae  | g__Coproccoccus    | s__Coproccoccus unknown_1    |
| MGYG-HGUT-00369:s__CAG-170 sp003516765       | 0.460<br>67<br>31<br>78 | 0.201<br>18<br>05<br>09      | 0.965<br>57<br>46<br>92 | d__Bacteroidetes | p__Firmicutes    | c__Clostridia  | o__Oscillospirales | f__Oscillospiraceae | g__CAG-170         | s__CAG-170 sp003516765       |
| MGYG-HGUT-00370:s__CAG-170 unknown_1         | 0.927<br>22<br>41<br>84 | -<br>0.024<br>60<br>08<br>57 | 0.994<br>47<br>94<br>74 | d__Bacteroidetes | p__Firmicutes    | c__Clostridia  | o__Oscillospirales | f__Oscillospiraceae | g__CAG-170         | s__CAG-170 unknown_1         |
| MGYG-HGUT-00373:s__UBA1255 unknown_1         | 0.645<br>02<br>93<br>33 | -<br>0.128<br>88<br>64<br>84 | 0.975<br>67<br>17<br>57 | d__Bacteroidetes | p__Firmicutes    | c__Clostridia  | o__UBA1212         | f__UBA1255          | g__UBA1255         | s__UBA1255 unknown_1         |
| MGYG-HGUT-00378:s__Lachnospiraceae unknown_7 | 0.940<br>51<br>37<br>09 | 0.020<br>94<br>06<br>42      | 0.994<br>47<br>94<br>74 | d__Bacteroidetes | p__Firmicutes    | c__Clostridia  | o__Lachnospirales  | f__Lachnospiraceae  | g__Lachnospiraceae | s__Lachnospiraceae unknown_7 |

|                                                      |                             |                                  |                             |                             |                             |                        |                                   |                                |                                   |                                                |
|------------------------------------------------------|-----------------------------|----------------------------------|-----------------------------|-----------------------------|-----------------------------|------------------------|-----------------------------------|--------------------------------|-----------------------------------|------------------------------------------------|
| MGYG-HGUT-00380:s__Merdibacter unknown_1             | 0.0<br>68<br>03<br>13<br>41 | -<br>0.4<br>98<br>05<br>19<br>43 | 0.8<br>74<br>61<br>87<br>46 | d_<br>_B<br>act<br>eri<br>a | p__Fi<br>rmicu<br>tes       | c__Ba<br>cilli         | o__Ery<br>sipelot<br>richale<br>s | f__Erysi<br>pelotric<br>haceae | g__Merdib<br>acter                | s__Merdibact<br>er<br>unknown_1                |
| MGYG-HGUT-00387:s__Lachnospiraceae unknown unknown_8 | 0.2<br>22<br>30<br>34<br>4  | 0.3<br>29<br>70<br>09<br>18      | 0.8<br>91<br>82<br>55<br>59 | d_<br>_B<br>act<br>eri<br>a | p__Fi<br>rmicu<br>tes_A     | c__Clo<br>stridia      | o__Lac<br>hnospi<br>rales         | f__Lach<br>nospirac<br>eae     | g__Lachno<br>spiraceae<br>unknown | s__Lachnospir<br>aceae<br>unknown<br>unknown_8 |
| MGYG-HGUT-00389:s__Roseburia unknown_2               | 0.4<br>12<br>49<br>67<br>61 | 0.2<br>28<br>19<br>82<br>37      | 0.9<br>39<br>70<br>92<br>5  | d_<br>_B<br>act<br>eri<br>a | p__Fi<br>rmicu<br>tes_A     | c__Clo<br>stridia      | o__Lac<br>hnospi<br>rales         | f__Lach<br>nospirac<br>eae     | g__Rosebu<br>ria                  | s__Roseburia<br>unknown_2                      |
| MGYG-HGUT-00398:s__TF01-11 unknown_1                 | 0.0<br>90<br>63<br>96<br>09 | 0.4<br>57<br>31<br>91<br>74      | 0.8<br>83<br>30<br>72<br>56 | d_<br>_B<br>act<br>eri<br>a | p__Fi<br>rmicu<br>tes_A     | c__Clo<br>stridia      | o__Lac<br>hnospi<br>rales         | f__Lach<br>nospirac<br>eae     | g__TF01-<br>11                    | s__TF01-11<br>unknown_1                        |
| MGYG-HGUT-00402:s__GCA-900066995 unknown             | 0.8<br>88<br>29<br>03<br>63 | -<br>0.0<br>38<br>53<br>21<br>13 | 0.9<br>94<br>47<br>94<br>74 | d_<br>_B<br>act<br>eri<br>a | p__Fi<br>rmicu<br>tes_A     | c__Clo<br>stridia      | o__Os<br>cillospi<br>rales        | f__Acut<br>alibacte<br>raceae  | g__GCA-<br>90006699<br>5          | s__GCA-<br>900066995<br>unknown                |
| MGYG-HGUT-00404:s__UBA1174 sp003507655               | 0.8<br>74<br>91<br>75<br>96 | 0.0<br>43<br>99<br>26<br>19      | 0.9<br>94<br>47<br>94<br>74 | d_<br>_B<br>act<br>eri<br>a | p__Fi<br>rmicu<br>tes_A     | c__Clo<br>stridia      | o__Lac<br>hnospi<br>rales         | f__Lach<br>nospirac<br>eae     | g__UBA11<br>774                   | s__UBA11774<br>sp003507655                     |
| MGYG-HGUT-00409:s__QALS01 sp003150575                | 0.4<br>31<br>11<br>03<br>22 | -<br>0.2<br>11<br>95<br>45<br>13 | 0.9<br>50<br>80<br>65<br>94 | d_<br>_B<br>act<br>eri<br>a | p__Fi<br>rmicu<br>tes_A     | c__Clo<br>stridia      | o__4C<br>28d-15                   | f__CAG-<br>727                 | g__QALS0<br>1                     | s__QALS01<br>sp003150575                       |
| MGYG-HGUT-00413:s__UBA7185 unknown_2                 | 0.9<br>33<br>80<br>49<br>07 | -<br>0.0<br>23<br>17<br>21<br>21 | 0.9<br>94<br>47<br>94<br>74 | d_<br>_B<br>act<br>eri<br>a | p__Fi<br>rmicu<br>tes_B     | c__Pe<br>ptococ<br>cia | o__Pe<br>ptococ<br>cales          | f__Pept<br>ococcac<br>eae      | g__UBA71<br>85                    | s__UBA7185<br>unknown_2                        |
| MGYG-HGUT-00414:s__Alistipes unknown_2               | 0.2<br>45<br>12             | 0.3<br>21<br>34                  | 0.9<br>02<br>18             | d_<br>_B<br>act             | p__B<br>acter<br>oidot<br>a | c__Ba<br>cteroi<br>dia | o__Bac<br>teroida<br>les          | f__Rike<br>nellacea<br>e       | g__Alistipe<br>s                  | s__Alistipes<br>unknown_2                      |

|                                                         |                             |                                  |                             |                             |                             |                        |                            |                                          |                                             |                                                       |
|---------------------------------------------------------|-----------------------------|----------------------------------|-----------------------------|-----------------------------|-----------------------------|------------------------|----------------------------|------------------------------------------|---------------------------------------------|-------------------------------------------------------|
|                                                         | 83<br>06                    | 62<br>63                         | 13<br>67                    | eri<br>a                    |                             |                        |                            |                                          |                                             |                                                       |
| MGYG-HGUT-00415:s__UBA11471 unknown_1                   | 0.4<br>42<br>78<br>97<br>44 | 0.2<br>12<br>32<br>39<br>33      | 0.9<br>60<br>27<br>33<br>89 | d_<br>_B<br>act<br>eri<br>a | p__B<br>acter<br>oidot<br>a | c__Ba<br>cteroi<br>dia | o__Bac<br>teroida<br>les   | f__UBA<br>11471                          | g__UBA11<br>471                             | s__UBA11471<br>unknown_1                              |
| MGYG-HGUT-00417:s__Acetatifactor unknown_1              | 0.0<br>46<br>36<br>26<br>69 | 0.5<br>50<br>13<br>84<br>47      | 0.7<br>99<br>66<br>70<br>98 | d_<br>_B<br>act<br>eri<br>a | p__Fi<br>rmicu<br>tes_A     | c__Clo<br>stridia      | o__Lac<br>hnospi<br>rales  | f__Lach<br>nospira<br>cae                | g__Acetati<br>factor                        | s__Acetatifac<br>tor<br>unknown_1                     |
| MGYG-HGUT-00420:s__Lachnospirales unknown unknown_1     | 0.9<br>89<br>76<br>65<br>62 | 0.0<br>03<br>57<br>15<br>53      | 0.9<br>98<br>80<br>33<br>46 | d_<br>_B<br>act<br>eri<br>a | p__Fi<br>rmicu<br>tes_A     | c__Clo<br>stridia      | o__Lac<br>hnospi<br>rales  | f__Lach<br>nospira<br>les<br>unknow<br>n | g__Lachno<br>spirales<br>unknown<br>unknown | s__Lachnospir<br>ales unknown<br>unknown<br>unknown_1 |
| MGYG-HGUT-00425:s__Ruminococcaceae unknown unknown_1    | 0.6<br>65<br>47<br>18<br>9  | 0.1<br>19<br>15<br>40<br>58      | 0.9<br>75<br>67<br>17<br>57 | d_<br>_B<br>act<br>eri<br>a | p__Fi<br>rmicu<br>tes_A     | c__Clo<br>stridia      | o__Os<br>cillospi<br>rales | f__Rumi<br>nococca<br>cae                | g__Rumin<br>ococcace<br>e unknown           | s__Ruminoco<br>ccaceae<br>unknown<br>unknown_1        |
| MGYG-HGUT-00429:s__UBA7597 unknown_1                    | 0.4<br>82<br>43<br>53<br>77 | 0.1<br>93<br>38<br>07<br>04      | 0.9<br>68<br>53<br>20<br>73 | d_<br>_B<br>act<br>eri<br>a | p__Fi<br>rmicu<br>tes_A     | c__Clo<br>stridia      | o__4C<br>28d-15            | f__CAG-<br>727                           | g__UBA75<br>97                              | s__UBA7597<br>unknown_1                               |
| MGYG-HGUT-00433:s__UBA1737 unknown                      | 0.1<br>13<br>99<br>73<br>37 | 0.4<br>37<br>07<br>60<br>04      | 0.8<br>83<br>30<br>72<br>56 | d_<br>_B<br>act<br>eri<br>a | p__Fi<br>rmicu<br>tes       | c__Ba<br>cilli         | o__ML<br>615J-<br>28       | f__CAG-<br>313                           | g__UBA17<br>37                              | s__UBA1737<br>unknown                                 |
| MGYG-HGUT-00437:s__Alistipes sp001941065                | 0.1<br>93<br>52<br>62<br>33 | 0.3<br>47<br>03<br>89<br>23      | 0.8<br>91<br>82<br>55<br>59 | d_<br>_B<br>act<br>eri<br>a | p__B<br>acter<br>oidot<br>a | c__Ba<br>cteroi<br>dia | o__Bac<br>teroida<br>les   | f__Rike<br>nellacea<br>e                 | g__Alistipe<br>s                            | s__Alistipes<br>sp001941065                           |
| MGYG-HGUT-00453:s__Eubacterium_R unknown_3              | 0.9<br>87<br>74<br>77<br>33 | -<br>0.0<br>04<br>14<br>26<br>83 | 0.9<br>98<br>80<br>33<br>46 | d_<br>_B<br>act<br>eri<br>a | p__Fi<br>rmicu<br>tes_A     | c__Clo<br>stridia      | o__Os<br>cillospi<br>rales | f__Acut<br>alibacte<br>raceae            | g__Eubact<br>erium_R                        | s__Eubacteriu<br>m_R<br>unknown_3                     |
| MGYG-HGUT-00456:s__Acutalibacteraceae unknown unknown_3 | 0.6<br>37<br>18<br>89<br>02 | -<br>0.1<br>31<br>85<br>68       | 0.9<br>75<br>67<br>17<br>57 | d_<br>_B<br>act<br>eri<br>a | p__Fi<br>rmicu<br>tes_A     | c__Clo<br>stridia      | o__Os<br>cillospi<br>rales | f__Acut<br>alibacte<br>raceae            | g__Acutali<br>bacteracea<br>e unknown       | s__Acutalibac<br>teraceae<br>unknown<br>unknown_3     |

|                                                      |                             |                                  |                             |                             |                         |                          |                                  |                                   |                                    |                                          |
|------------------------------------------------------|-----------------------------|----------------------------------|-----------------------------|-----------------------------|-------------------------|--------------------------|----------------------------------|-----------------------------------|------------------------------------|------------------------------------------|
| MGYG-HGUT-00457:s__UBA737 unknown_2                  | 0.6<br>18<br>31<br>56<br>55 | 0.1<br>39<br>15<br>13<br>3       | 0.9<br>75<br>67<br>17<br>57 | d_<br>_B<br>act<br>eri<br>a | p__Fi<br>rmicu<br>tes_A | c__Clo<br>stridia        | o__Os<br>cillospi<br>rales       | f__Acut<br>alibacte<br>raceae     | g__UBA73<br>7                      | s__UBA737<br>unknown_2                   |
| MGYG-HGUT-00468:s__CAG-272 unknown unknown_4         | 0.4<br>76<br>14<br>67<br>49 | 0.2<br>00<br>07<br>06<br>03      | 0.9<br>68<br>53<br>20<br>73 | d_<br>_B<br>act<br>eri<br>a | p__Fi<br>rmicu<br>tes_A | c__Clo<br>stridia        | o__Os<br>cillospi<br>rales       | f__CAG-<br>272                    | g__CAG-<br>272<br>unknown          | s__CAG-272<br>unknown<br>unknown_4       |
| MGYG-HGUT-00474:s__Oscillibacter unknown_2           | 0.5<br>29<br>30<br>41<br>14 | 0.1<br>60<br>86<br>74<br>6       | 0.9<br>68<br>53<br>20<br>73 | d_<br>_B<br>act<br>eri<br>a | p__Fi<br>rmicu<br>tes_A | c__Clo<br>stridia        | o__Os<br>cillospi<br>rales       | f__Oscil<br>lospirac<br>eae       | g__Oscilib<br>acter                | s__Oscilibact<br>er<br>unknown_2         |
| MGYG-HGUT-00476:s__CAG-382 unknown unknown_2         | 0.7<br>60<br>53<br>34<br>61 | 0.0<br>83<br>60<br>17<br>28      | 0.9<br>79<br>45<br>84<br>75 | d_<br>_B<br>act<br>eri<br>a | p__Fi<br>rmicu<br>tes_A | c__Clo<br>stridia        | o__Os<br>cillospi<br>rales       | f__CAG-<br>382                    | g__CAG-<br>382<br>unknown          | s__CAG-382<br>unknown<br>unknown_2       |
| MGYG-HGUT-00484:s__Butyrivibrio_A sp000431815        | 0.3<br>35<br>79<br>11<br>63 | 0.2<br>68<br>58<br>09<br>05      | 0.9<br>30<br>62<br>46<br>92 | d_<br>_B<br>act<br>eri<br>a | p__Fi<br>rmicu<br>tes_A | c__Clo<br>stridia        | o__Lac<br>hnospi<br>rales        | f__Lach<br>nospi<br>rales         | g__Butyriv<br>ibrio_A              | s__Butyrivibri<br>o_A<br>sp000431815     |
| MGYG-HGUT-00486:s__Phascolarctobacterium_A unknown_3 | 0.7<br>59<br>59<br>63<br>97 | 0.0<br>85<br>83<br>20<br>8       | 0.9<br>79<br>45<br>84<br>75 | d_<br>_B<br>act<br>eri<br>a | p__Fi<br>rmicu<br>tes_C | c__Ne<br>gativic<br>utes | o__Aci<br>damin<br>ococca<br>les | f__Acid<br>aminoc<br>occacea<br>e | g__Phasco<br>larctobact<br>erium_A | s__Phascolarctobacterium_<br>A unknown_3 |
| MGYG-HGUT-00489:s__Agathobacter unknown_1            | 0.2<br>88<br>78<br>62<br>73 | 0.2<br>75<br>18<br>78<br>69      | 0.9<br>29<br>02<br>59<br>13 | d_<br>_B<br>act<br>eri<br>a | p__Fi<br>rmicu<br>tes_A | c__Clo<br>stridia        | o__Lac<br>hnospi<br>rales        | f__Lach<br>nospi<br>rales         | g__Agathob<br>acter                | s__Agathobact<br>er<br>unknown_1         |
| MGYG-HGUT-00500:s__CAG-110 unknown_1                 | 0.0<br>20<br>54<br>19<br>97 | 0.6<br>26<br>57<br>13<br>53      | 0.7<br>68<br>22<br>58<br>34 | d_<br>_B<br>act<br>eri<br>a | p__Fi<br>rmicu<br>tes_A | c__Clo<br>stridia        | o__Os<br>cillospi<br>rales       | f__Oscil<br>lospirac<br>eae       | g__CAG-<br>110                     | s__CAG-110<br>unknown_1                  |
| MGYG-HGUT-00501:s__CAG-127 unknown_1                 | 0.2<br>36<br>33<br>10<br>51 | -<br>0.3<br>27<br>06<br>88<br>22 | 0.9<br>02<br>18<br>13<br>67 | d_<br>_B<br>act<br>eri<br>a | p__Fi<br>rmicu<br>tes_A | c__Clo<br>stridia        | o__Lac<br>hnospi<br>rales        | f__Lach<br>nospi<br>rales         | g__CAG-<br>127                     | s__CAG-127<br>unknown_1                  |

|                                                         |                             |                                  |                             |                             |                                 |                                |                                   |                                    |                                       |                                                   |
|---------------------------------------------------------|-----------------------------|----------------------------------|-----------------------------|-----------------------------|---------------------------------|--------------------------------|-----------------------------------|------------------------------------|---------------------------------------|---------------------------------------------------|
| MGYG-HGUT-00505:s__Acutalibacteraceae unknown unknown_4 | 0.1<br>96<br>88<br>71<br>82 | 0.3<br>60<br>43<br>68<br>24      | 0.8<br>91<br>82<br>55<br>59 | d_<br>_B<br>act<br>eri<br>a | p__Fi<br>rmicu<br>tes_A         | c__Clo<br>stridia              | o__Os<br>cillospi<br>rales        | f__Acut<br>alibacte<br>raceae      | g__Acutali<br>bacteracea<br>e unknown | s__Acutalibac<br>teraceae<br>unknown<br>unknown_4 |
| MGYG-HGUT-00512:s__Faecalibacterium unknown_1           | 0.6<br>71<br>31<br>60<br>56 | 0.1<br>18<br>46<br>55<br>45      | 0.9<br>75<br>67<br>17<br>57 | d_<br>_B<br>act<br>eri<br>a | p__Fi<br>rmicu<br>tes_A         | c__Clo<br>stridia              | o__Os<br>cillospi<br>rales        | f__Rumi<br>nococca<br>ceae         | g__Faecali<br>bacterium               | s__Faecalibac<br>terium<br>unknown_1              |
| MGYG-HGUT-00514:s__CAG-590 unknown_1                    | 0.4<br>02<br>05<br>69<br>39 | 0.2<br>34<br>78<br>68<br>23      | 0.9<br>39<br>70<br>92<br>5  | d_<br>_B<br>act<br>eri<br>a | p__Fi<br>rmicu<br>tes_A         | c__Clo<br>stridia              | o__Lac<br>hnospi<br>rales         | f__Lach<br>nospirac<br>eae         | g__CAG-<br>590                        | s__CAG-590<br>unknown_1                           |
| MGYG-HGUT-00515:s__UBA2882 unknown_1                    | 0.7<br>57<br>98<br>11<br>1  | -<br>0.0<br>86<br>19<br>00<br>47 | 0.9<br>79<br>45<br>84<br>75 | d_<br>_B<br>act<br>eri<br>a | p__Fi<br>rmicu<br>tes_A         | c__Clo<br>stridia              | o__Lac<br>hnospi<br>rales         | f__Lach<br>nospirac<br>eae         | g__UBA28<br>82                        | s__UBA2882<br>unknown_1                           |
| MGYG-HGUT-00522:s__Methanobrevibacter_A unknown_1       | 0.1<br>67<br>56<br>38<br>9  | 0.3<br>85<br>78<br>09<br>09      | 0.8<br>91<br>82<br>55<br>59 | d_<br>_A<br>rc<br>ha<br>ea  | p__E<br>uryar<br>chaeo<br>ta    | c__M<br>ethan<br>obact<br>eria | o__Me<br>thanob<br>acteria<br>les | f__Met<br>hanoba<br>cteriace<br>ae | g__Metha<br>nobreviba<br>cter_A       | s__Methanob<br>revibacter_A<br>unknown_1          |
| MGYG-HGUT-00530:s__PeH17 sp000435055                    | 0.7<br>61<br>73<br>58<br>59 | -<br>0.0<br>78<br>04<br>21<br>41 | 0.9<br>79<br>45<br>84<br>75 | d_<br>_B<br>act<br>eri<br>a | p__Fi<br>rmicu<br>tes_A         | c__Clo<br>stridia              | o__Chr<br>istense<br>nellale<br>s | f__CAG-<br>138                     | g__PeH17                              | s__PeH17<br>sp000435055                           |
| MGYG-HGUT-00531:s__Collinsella unknown_28               | 0.7<br>52<br>06<br>57<br>02 | 0.0<br>88<br>11<br>68<br>73      | 0.9<br>79<br>45<br>84<br>75 | d_<br>_B<br>act<br>eri<br>a | p__A<br>ctino<br>bacte<br>riota | c__Co<br>riobac<br>teriia      | o__Cor<br>iobact<br>eriales       | f__Cori<br>obacteri<br>aceae       | g__Collins<br>ella                    | s__Collinsella<br>unknown_28                      |
| MGYG-HGUT-00532:s__CAG-510 sp000434615                  | 0.0<br>29<br>67<br>57<br>61 | 0.5<br>98<br>35<br>87<br>2       | 0.7<br>68<br>22<br>58<br>34 | d_<br>_B<br>act<br>eri<br>a | p__Fi<br>rmicu<br>tes_A         | c__Clo<br>stridia              | o__Lac<br>hnospi<br>rales         | f__Lach<br>nospirac<br>eae         | g__CAG-<br>510                        | s__CAG-510<br>sp000434615                         |
| MGYG-HGUT-00534:s__Prevotella unknown_2                 | 0.5<br>43<br>40<br>50<br>04 | -<br>0.1<br>67<br>54<br>62<br>51 | 0.9<br>68<br>53<br>20<br>73 | d_<br>_B<br>act<br>eri<br>a | p__B<br>acter<br>oidot<br>a     | c__Ba<br>cteroi<br>dia         | o__Bac<br>teroida<br>les          | f__Bact<br>eroidac<br>eae          | g__Prevot<br>ella                     | s__Prevotella<br>unknown_2                        |

|                                                      |                             |                                  |                             |                             |                                 |                                 |                                    |                                          |                                  |                                               |
|------------------------------------------------------|-----------------------------|----------------------------------|-----------------------------|-----------------------------|---------------------------------|---------------------------------|------------------------------------|------------------------------------------|----------------------------------|-----------------------------------------------|
| MGYG-HGUT-00537:s__Ruminococcaceae unknown unknown_6 | 0.6<br>88<br>64<br>16<br>53 | 0.1<br>11<br>67<br>23<br>73      | 0.9<br>75<br>76<br>85<br>79 | d_<br>_B<br>act<br>eri<br>a | p__Fi<br>rmicu<br>tes_A         | c__Clo<br>stridia               | o__Os<br>cillospi<br>rales         | f__Rumi<br>nococca<br>ceae               | g__Rumin<br>ococcea<br>e unknown | s__Ruminoco<br>caceae<br>unknown<br>unknown_6 |
| MGYG-HGUT-00543:s__Agathobacter unknown_2            | 0.3<br>32<br>80<br>93<br>5  | 0.2<br>66<br>18<br>60<br>07      | 0.9<br>30<br>62<br>46<br>92 | d_<br>_B<br>act<br>eri<br>a | p__Fi<br>rmicu<br>tes_A         | c__Clo<br>stridia               | o__Lac<br>hnospi<br>rales          | f__Lach<br>nospira<br>ceae               | g__Agatho<br>bacter              | s__Agathobac<br>ter<br>unknown_2              |
| MGYG-HGUT-00544:s__Zag1 unknown_4                    | 0.5<br>39<br>05<br>15<br>43 | 0.1<br>71<br>64<br>47<br>41      | 0.9<br>68<br>53<br>20<br>73 | d_<br>_B<br>act<br>eri<br>a | p__C<br>yano<br>bacte<br>ria    | c__Va<br>mpiro<br>vibrio<br>nia | o__Ga<br>strana<br>erophil<br>ales | f__Gast<br>ranaero<br>philacea<br>e      | g__Zag1                          | s__Zag1<br>unknown_4                          |
| MGYG-HGUT-00545:s__Faecalicatena unknown_1           | 0.9<br>49<br>25<br>12<br>27 | 0.0<br>17<br>80<br>76<br>45      | 0.9<br>94<br>47<br>94<br>74 | d_<br>_B<br>act<br>eri<br>a | p__Fi<br>rmicu<br>tes_A         | c__Clo<br>stridia               | o__Lac<br>hnospi<br>rales          | f__Lach<br>nospira<br>ceae               | g__Faecali<br>catena             | s__Faecalicat<br>ena<br>unknown_1             |
| MGYG-HGUT-00546:s__Roseburia sp003483745             | 0.4<br>19<br>81<br>32<br>19 | 0.2<br>24<br>12<br>49<br>33      | 0.9<br>41<br>28<br>76<br>06 | d_<br>_B<br>act<br>eri<br>a | p__Fi<br>rmicu<br>tes_A         | c__Clo<br>stridia               | o__Lac<br>hnospi<br>rales          | f__Lach<br>nospira<br>ceae               | g__Rosebu<br>ria                 | s__Roseburia<br>sp003483745                   |
| MGYG-HGUT-00547:s__Catenibacterium unknown_1         | 0.7<br>10<br>90<br>10<br>08 | -<br>0.1<br>02<br>92<br>08<br>04 | 0.9<br>79<br>45<br>84<br>75 | d_<br>_B<br>act<br>eri<br>a | p__Fi<br>rmicu<br>tes           | c__Ba<br>cilli                  | o__Ery<br>sipelot<br>richale<br>s  | f__Erysi<br>pelatocl<br>ostridia<br>ceae | g__Cateni<br>bacterium           | s__Catenibact<br>erium<br>unknown_1           |
| MGYG-HGUT-00550:s__Lawsonibacter sp002160305         | 0.4<br>01<br>40<br>20<br>94 | -<br>0.2<br>28<br>41<br>73<br>76 | 0.9<br>39<br>70<br>92<br>5  | d_<br>_B<br>act<br>eri<br>a | p__Fi<br>rmicu<br>tes_A         | c__Clo<br>stridia               | o__Os<br>cillospi<br>rales         | f__Oscil<br>lospirac<br>eae              | g__Lawson<br>ibacter             | s__Lawsoniba<br>cter<br>sp002160305           |
| MGYG-HGUT-00553:s__Prevotella unknown_3              | 0.7<br>94<br>67<br>02<br>27 | 0.0<br>70<br>94<br>63<br>58      | 0.9<br>82<br>96<br>63       | d_<br>_B<br>act<br>eri<br>a | p__B<br>acter<br>oidot<br>a     | c__Ba<br>cteroi<br>dia          | o__Bac<br>teroida<br>les           | f__Bact<br>eroidac<br>eae                | g__Prevot<br>ella                | s__Prevotella<br>unknown_3                    |
| MGYG-HGUT-00556:s__Collinsella sp002232035_9         | 0.0<br>19<br>33<br>01<br>08 | 0.6<br>40<br>00<br>11<br>26      | 0.7<br>68<br>22<br>58<br>34 | d_<br>_B<br>act<br>eri<br>a | p__A<br>ctino<br>bacte<br>riota | c__Co<br>riobac<br>teriia       | o__Cor<br>iobact<br>eriales        | f__Cori<br>obacteri<br>aceae             | g__Collins<br>ella               | s__Collinsella<br>sp002232035<br>_9           |

|                                                 |             |              |             |             |                      |                   |                     |                      |                            |                                 |
|-------------------------------------------------|-------------|--------------|-------------|-------------|----------------------|-------------------|---------------------|----------------------|----------------------------|---------------------------------|
| MGYG-HGUT-00559:s__Paraprevotella unknown_1     | 0.77998684  | 0.077912163  | 0.979520484 | d__Bacteria | p__Bacteroidetes     | c__Bacteroidia    | o__Bacteroidales    | f__Bacteroidaceae    | g__Paraprevotella          | s__Paraprevotella unknown_1     |
| MGYG-HGUT-00562:s__Lachnospira sp000437735      | 0.165770577 | -0.382816692 | 0.891825559 | d__Bacteria | p__Firmicutes        | c__Clostridia     | o__Lachnospirales   | f__Lachnospiraceae   | g__Lachnospira             | s__Lachnospira sp000437735      |
| MGYG-HGUT-00563:s__Collinsella unknown_29       | 0.120994988 | 0.430538208  | 0.885742175 | d__Bacteria | p__Actinobacteria    | c__Coriobacteriia | o__Coriobacteriales | f__Coriobacteriaceae | g__Collinsella             | s__Collinsella unknown_29       |
| MGYG-HGUT-00568:s__CAG-279 unknown_1            | 0.209532534 | 0.348967966  | 0.891825559 | d__Bacteria | p__Bacteroidetes     | c__Bacteroidia    | o__Bacteroidales    | f__Muriabaculaceae   | g__CAG-279                 | s__CAG-279 unknown_1            |
| MGYG-HGUT-00573:s__Gemmiger unknown_1           | 0.016727718 | 0.656662792  | 0.768225834 | d__Bacteria | p__Firmicutes        | c__Clostridia     | o__Oscillospirales  | f__Ruminococcaceae   | g__Gemmiger                | s__Gemmiger unknown_1           |
| MGYG-HGUT-00574:s__Lachnospiraceae unknown_9    | 0.002934632 | 0.801594538  | 0.648124372 | d__Bacteria | p__Firmicutes        | c__Clostridia     | o__Lachnospirales   | f__Lachnospiraceae   | g__Lachnospiraceae unknown | s__Lachnospiraceae unknown_9    |
| MGYG-HGUT-00575:s__UBA11452 sp003526375         | 0.397332674 | 0.232996533  | 0.93970925  | d__Bacteria | p__Verrucomicrobiota | c__Leptisphaeria  | o__Vitivallales     | f__UBA1829           | g__UBA11452                | s__UBA11452 sp003526375         |
| MGYG-HGUT-00576:s__Streptococcus unknown_4      | 0.412427731 | 0.218751076  | 0.93970925  | d__Bacteria | p__Firmicutes        | c__Bacilli        | o__Lactobacillales  | f__Streptococcaceae  | g__Streptococcus           | s__Streptococcus unknown_4      |
| MGYG-HGUT-00580:s__Streptococcus vestibularis_1 | 0.821420823 | 0.062978677  | 0.991136622 | d__Bacteria | p__Firmicutes        | c__Bacilli        | o__Lactobacillales  | f__Streptococcaceae  | g__Streptococcus           | s__Streptococcus vestibularis_1 |

|                                                                   |                             |                                  |                             |                             |                                 |                           |                                  |                                   |                                    |                                                           |
|-------------------------------------------------------------------|-----------------------------|----------------------------------|-----------------------------|-----------------------------|---------------------------------|---------------------------|----------------------------------|-----------------------------------|------------------------------------|-----------------------------------------------------------|
| MGYG-HGUT-00583:s__Acetatifa<br>ctor unknown_2                    | 0.0<br>11<br>58<br>46<br>61 | 0.6<br>85<br>97<br>60<br>42      | 0.7<br>68<br>22<br>58<br>34 | d_<br>_B<br>act<br>eri<br>a | p__Fi<br>rmicu<br>tes_A         | c__Clo<br>stridia         | o__Lac<br>hnoSPI<br>rales        | f__Lach<br>nospira<br>ceae        | g__Acetati<br>factor               | s__Acetatifa<br>ctor<br>unknown_2                         |
| MGYG-HGUT-00584:s__RC9<br>unknown_2                               | 0.3<br>26<br>01<br>96<br>56 | 0.2<br>72<br>92<br>91<br>25      | 0.9<br>30<br>62<br>46<br>92 | d_<br>_B<br>act<br>eri<br>a | p__B<br>acter<br>oidot<br>a     | c__Ba<br>cteroi<br>dia    | o__Bac<br>teroida<br>les         | f__UBA<br>932                     | g__RC9                             | s__RC9<br>unknown_2                                       |
| MGYG-HGUT-00589:s__Faecalib<br>acterium<br>unknown_2              | 0.1<br>45<br>37<br>38<br>59 | 0.4<br>02<br>41<br>28<br>85      | 0.8<br>91<br>82<br>55<br>59 | d_<br>_B<br>act<br>eri<br>a | p__Fi<br>rmicu<br>tes_A         | c__Clo<br>stridia         | o__Os<br>cillospi<br>rales       | f__Rumi<br>nococca<br>ceae        | g__Faecali<br>bacterium            | s__Faecalibac<br>terium<br>unknown_2                      |
| MGYG-HGUT-00591:s__Phascola<br>rctobacterium_A<br>succinatutens_A | 0.7<br>64<br>20<br>96<br>14 | 0.0<br>82<br>36<br>66<br>03      | 0.9<br>79<br>52<br>04<br>84 | d_<br>_B<br>act<br>eri<br>a | p__Fi<br>rmicu<br>tes_C         | c__Ne<br>gativic<br>utes  | o__Aci<br>damin<br>ococca<br>les | f__Acid<br>aminoc<br>occacea<br>e | g__Phasco<br>larctobact<br>erium_A | s__Phascolarc<br>tobacterium_<br>A<br>succinatutens<br>_A |
| MGYG-HGUT-00592:s__RC9<br>unknown_3                               | 0.0<br>46<br>53<br>91<br>04 | 0.5<br>48<br>41<br>86<br>48      | 0.7<br>99<br>66<br>70<br>98 | d_<br>_B<br>act<br>eri<br>a | p__B<br>acter<br>oidot<br>a     | c__Ba<br>cteroi<br>dia    | o__Bac<br>teroida<br>les         | f__UBA<br>932                     | g__RC9                             | s__RC9<br>unknown_3                                       |
| MGYG-HGUT-00593:s__Collinsella<br>unknown_32                      | 0.8<br>59<br>42<br>31<br>12 | -<br>0.0<br>48<br>65<br>55<br>38 | 0.9<br>92<br>87<br>80<br>88 | d_<br>_B<br>act<br>eri<br>a | p__A<br>ctino<br>bacte<br>riota | c__Co<br>riobac<br>teriia | o__Cor<br>iobact<br>eriales      | f__Cori<br>obacteri<br>aceae      | g__Collins<br>ella                 | s__Collinsella<br>unknown_32                              |
| MGYG-HGUT-00594:s__Collinsella<br>unknown_33                      | 0.0<br>11<br>73<br>86<br>7  | -<br>0.6<br>93<br>29<br>68<br>17 | 0.7<br>68<br>22<br>58<br>34 | d_<br>_B<br>act<br>eri<br>a | p__A<br>ctino<br>bacte<br>riota | c__Co<br>riobac<br>teriia | o__Cor<br>iobact<br>eriales      | f__Cori<br>obacteri<br>aceae      | g__Collins<br>ella                 | s__Collinsella<br>unknown_33                              |
| MGYG-HGUT-00597:s__Senegali<br>massilia<br>unknown_1              | 0.9<br>46<br>93<br>34<br>59 | -<br>0.0<br>18<br>53<br>81<br>54 | 0.9<br>94<br>47<br>94<br>74 | d_<br>_B<br>act<br>eri<br>a | p__A<br>ctino<br>bacte<br>riota | c__Co<br>riobac<br>teriia | o__Cor<br>iobact<br>eriales      | f__Egge<br>rthellac<br>eae        | g__Senega<br>limassilia            | s__Senegalim<br>assilia<br>unknown_1                      |
| MGYG-HGUT-00598:s__Collinsella<br>unknown_34                      | 0.3<br>53<br>95<br>06<br>2  | 0.2<br>53<br>61<br>91<br>94      | 0.9<br>39<br>70<br>92<br>5  | d_<br>_B<br>act<br>eri<br>a | p__A<br>ctino<br>bacte<br>riota | c__Co<br>riobac<br>teriia | o__Cor<br>iobact<br>eriales      | f__Cori<br>obacteri<br>aceae      | g__Collins<br>ella                 | s__Collinsella<br>unknown_34                              |



|                                               |                             |                                  |                             |                             |                                      |                           |                             |                              |                                  |                                            |
|-----------------------------------------------|-----------------------------|----------------------------------|-----------------------------|-----------------------------|--------------------------------------|---------------------------|-----------------------------|------------------------------|----------------------------------|--------------------------------------------|
| MGYG-HGUT-00599:s__Collinsella unknown_35     | 0.8<br>83<br>40<br>15<br>63 | 0.0<br>40<br>94<br>93<br>39      | 0.9<br>94<br>47<br>94<br>74 | d_<br>_B<br>act<br>eri<br>a | p__A<br>ctino<br>bacte<br>riota      | c__Co<br>riobac<br>teriia | o__Cor<br>iobact<br>eriales | f__Cori<br>obacteri<br>aceae | g__Collins<br>ella               | s__Collinsella<br>unknown_35               |
| MGYG-HGUT-00602:s__CAG-1427 unknown_4         | 0.9<br>80<br>46<br>36<br>49 | -<br>0.0<br>06<br>81<br>17<br>29 | 0.9<br>97<br>64<br>79<br>14 | d_<br>_B<br>act<br>eri<br>a | p__A<br>ctino<br>bacte<br>riota      | c__Co<br>riobac<br>teriia | o__Cor<br>iobact<br>eriales | f__Egge<br>rthellac<br>eae   | g__CAG-<br>1427                  | s__CAG-1427<br>unknown_4                   |
| MGYG-HGUT-00605:s__Ruminococcus_C unknown_1   | 0.4<br>36<br>11<br>10<br>38 | 0.2<br>13<br>64<br>16<br>34      | 0.9<br>50<br>80<br>65<br>94 | d_<br>_B<br>act<br>eri<br>a | p__Fi<br>rmicu<br>tes_A              | c__Clo<br>stridia         | o__Os<br>cillospi<br>rales  | f__Rumi<br>nococca<br>ceae   | g__Rumin<br>ococcus_C            | s__Ruminoco<br>ccus_C<br>unknown_1         |
| MGYG-HGUT-00606:s__RC9 sp000433355            | 0.3<br>74<br>11<br>24<br>26 | 0.2<br>49<br>15<br>54<br>55      | 0.9<br>39<br>70<br>92<br>5  | d_<br>_B<br>act<br>eri<br>a | p__B<br>acter<br>oidot<br>a          | c__Ba<br>cteroi<br>dia    | o__Bac<br>teroida<br>les    | f__UBA<br>932                | g__RC9                           | s__RC9<br>sp000433355                      |
| MGYG-HGUT-00608:s__Victivallaceae unknown_2   | 0.1<br>68<br>52<br>96<br>04 | 0.3<br>82<br>61<br>48<br>15      | 0.8<br>91<br>82<br>55<br>59 | d_<br>_B<br>act<br>eri<br>a | p__V<br>erruc<br>omicr<br>obiot<br>a | c__Le<br>ntisph<br>aeria  | o__Vic<br>tivallal<br>es    | f__Victi<br>vallacea<br>e    | g__Victival<br>laceae<br>unknown | s__Victivallac<br>eae unknown<br>unknown_2 |
| MGYG-HGUT-00611:s__Senegalimassilia unknown_2 | 0.2<br>89<br>73<br>64<br>12 | 0.2<br>96<br>13<br>42<br>42      | 0.9<br>29<br>02<br>59<br>13 | d_<br>_B<br>act<br>eri<br>a | p__A<br>ctino<br>bacte<br>riota      | c__Co<br>riobac<br>teriia | o__Cor<br>iobact<br>eriales | f__Egge<br>rthellac<br>eae   | g__Senega<br>limassilia          | s__Senegalim<br>assilia<br>unknown_2       |
| MGYG-HGUT-00621:s__Acetatifactor unknown_3    | 0.9<br>51<br>94<br>55<br>86 | 0.0<br>16<br>57<br>73<br>8       | 0.9<br>94<br>47<br>94<br>74 | d_<br>_B<br>act<br>eri<br>a | p__Fi<br>rmicu<br>tes_A              | c__Clo<br>stridia         | o__Lac<br>hnospi<br>rales   | f__Lach<br>nospirac<br>eae   | g__Acetati<br>factor             | s__Acetatifac<br>tor<br>unknown_3          |
| MGYG-HGUT-00623:s__Blautia_A unknown_6        | 0.0<br>06<br>20<br>42<br>28 | 0.7<br>32<br>77<br>79<br>86      | 0.7<br>50<br>05<br>64<br>24 | d_<br>_B<br>act<br>eri<br>a | p__Fi<br>rmicu<br>tes_A              | c__Clo<br>stridia         | o__Lac<br>hnospi<br>rales   | f__Lach<br>nospirac<br>eae   | g__Blautia<br>_A                 | s__Blautia_A<br>unknown_6                  |
| MGYG-HGUT-00625:s__CAG-127 unknown_2          | 0.7<br>41<br>00<br>22<br>17 | -<br>0.0<br>91<br>79<br>76<br>23 | 0.9<br>79<br>45<br>84<br>75 | d_<br>_B<br>act<br>eri<br>a | p__Fi<br>rmicu<br>tes_A              | c__Clo<br>stridia         | o__Lac<br>hnospi<br>rales   | f__Lach<br>nospirac<br>eae   | g__CAG-<br>127                   | s__CAG-127<br>unknown_2                    |

|                                               |             |                 |             |             |                     |                     |                        |                         |                     |                               |
|-----------------------------------------------|-------------|-----------------|-------------|-------------|---------------------|---------------------|------------------------|-------------------------|---------------------|-------------------------------|
| MGYG-HGUT-00626:s__Eubacterium_J unknown      | 0.932120181 | 0.022673575     | 0.94749474  | d__Bacteria | p__Firmicutes_A     | c__Clostridia       | o__Lachnospirales      | f__Lachnospiraceae      | g__Eubacterium_J    | s__Eubacterium_J unknown      |
| MGYG-HGUT-00629:s__CAG-196 unknown_2          | 0.272075    | 0.307436154     | 0.926757771 | d__Bacteria | p__Cyanobacteria    | c__Vampirovibrionia | o__Gastranaerophilales | f__Gastranaerophilaceae | g__CAG-196          | s__CAG-196 unknown_2          |
| MGYG-HGUT-00631:s__Prevotella sp002299635     | 0.88723613  | -0.038479940228 | 0.994479474 | d__Bacteria | p__Bacteroidota     | c__Bacteroidia      | o__Bacteroidales       | f__Bacteroidaceae       | g__Prevotella       | s__Prevotella sp002299635     |
| MGYG-HGUT-00636:s__Faecalibacterium unknown_3 | 0.05422584  | 0.529127346     | 0.85721132  | d__Bacteria | p__Firmicutes_A     | c__Clostridia       | o__Oscillospirales     | f__Ruminococcaceae      | g__Faecalibacterium | s__Faecalibacterium unknown_3 |
| MGYG-HGUT-00638:s__Lachnospira unknown_1      | 0.198246896 | 0.324331359     | 0.891825559 | d__Bacteria | p__Firmicutes_A     | c__Clostridia       | o__Lachnospirales      | f__Lachnospiraceae      | g__Lachnospira      | s__Lachnospira unknown_1      |
| MGYG-HGUT-00641:s__Collinsella unknown_36     | 0.867084767 | 0.04692657      | 0.994479474 | d__Bacteria | p__Actinobacteriota | c__Coriobacteriia   | o__Coriobacteriales    | f__Coriobacteriaceae    | g__Collinsella      | s__Collinsella unknown_36     |
| MGYG-HGUT-00643:s__Senegalimassilia unknown_3 | 0.376664155 | 0.242247917     | 0.93970925  | d__Bacteria | p__Actinobacteriota | c__Coriobacteriia   | o__Coriobacteriales    | f__Eggerthellaceae      | g__Senegalimassilia | s__Senegalimassilia unknown_3 |
| MGYG-HGUT-00644:s__Prevotella unknown_4       | 0.758584816 | 0.082857609     | 0.979458475 | d__Bacteria | p__Bacteroidota     | c__Bacteroidia      | o__Bacteroidales       | f__Bacteroidaceae       | g__Prevotella       | s__Prevotella unknown_4       |
| MGYG-HGUT-00645:s__Collinsella unknown_37     | 0.448209268 | -0.207957908    | 0.961292208 | d__Bacteria | p__Actinobacteriota | c__Coriobacteriia   | o__Coriobacteriales    | f__Coriobacteriaceae    | g__Collinsella      | s__Collinsella unknown_37     |

|                                              |                             |                                  |                             |                             |                                 |                           |                                   |                                |                      |                                     |
|----------------------------------------------|-----------------------------|----------------------------------|-----------------------------|-----------------------------|---------------------------------|---------------------------|-----------------------------------|--------------------------------|----------------------|-------------------------------------|
| MGYG-HGUT-00646:s__Eubacterium_R sp000436835 | 0.2<br>45<br>68<br>15<br>16 | -<br>0.3<br>23<br>83<br>40<br>78 | 0.9<br>02<br>18<br>13<br>67 | d_<br>_B<br>act<br>eri<br>a | p__Fi<br>rmicu<br>tes_A         | c__Clo<br>stridia         | o__Os<br>cillospi<br>rales        | f__Acut<br>alibacte<br>raceae  | g__Eubact<br>erium_R | s__Eubacteriu<br>m_R<br>sp000436835 |
| MGYG-HGUT-00650:s__Clostridium_M unknown_2   | 0.7<br>46<br>25<br>27<br>04 | 0.0<br>90<br>85<br>78<br>37      | 0.9<br>79<br>45<br>84<br>75 | d_<br>_B<br>act<br>eri<br>a | p__Fi<br>rmicu<br>tes_A         | c__Clo<br>stridia         | o__Lac<br>hnospi<br>rales         | f__Lach<br>nospirac<br>eae     | g__Clostri<br>dium_M | s__Clostridiu<br>m_M<br>unknown_2   |
| MGYG-HGUT-00651:s__CAG-170 sp002404795       | 0.1<br>65<br>99<br>67<br>98 | 0.3<br>74<br>45<br>19<br>89      | 0.8<br>91<br>82<br>55<br>59 | d_<br>_B<br>act<br>eri<br>a | p__Fi<br>rmicu<br>tes_A         | c__Clo<br>stridia         | o__Os<br>cillospi<br>rales        | f__Oscil<br>lospirac<br>eae    | g__CAG-<br>170       | s__CAG-170<br>sp002404795           |
| MGYG-HGUT-00652:s__Bacteroides togonis       | 0.5<br>35<br>61<br>89<br>91 | 0.1<br>73<br>75<br>62<br>92      | 0.9<br>68<br>53<br>20<br>73 | d_<br>_B<br>act<br>eri<br>a | p__B<br>acter<br>oidot<br>a     | c__Ba<br>cteroi<br>dia    | o__Bac<br>teroida<br>les          | f__Bact<br>eroidac<br>eae      | g__Bacter<br>oides   | s__Bacteroides<br>togonis           |
| MGYG-HGUT-00653:s__UBA11471 sp000434215      | 0.0<br>50<br>06<br>77<br>13 | -<br>0.5<br>32<br>83<br>84<br>13 | 0.8<br>44<br>06<br>60<br>7  | d_<br>_B<br>act<br>eri<br>a | p__B<br>acter<br>oidot<br>a     | c__Ba<br>cteroi<br>dia    | o__Bac<br>teroida<br>les          | f__UBA<br>11471                | g__UBA11<br>471      | s__UBA11471<br>sp000434215          |
| MGYG-HGUT-00655:s__Holdemanela unknown_2     | 0.7<br>98<br>69<br>53<br>12 | 0.0<br>70<br>82<br>23<br>96      | 0.9<br>85<br>68<br>26<br>81 | d_<br>_B<br>act<br>eri<br>a | p__Fi<br>rmicu<br>tes           | c__Ba<br>cilli            | o__Ery<br>sipelot<br>richale<br>s | f__Erysi<br>pelotric<br>haceae | g__Holde<br>manella  | s__Holdeman<br>ella<br>unknown_2    |
| MGYG-HGUT-00656:s__CAG-269 unknown_7         | 0.6<br>11<br>80<br>15<br>13 | 0.1<br>42<br>31<br>09<br>3       | 0.9<br>75<br>67<br>17<br>57 | d_<br>_B<br>act<br>eri<br>a | p__Fi<br>rmicu<br>tes_A         | c__Clo<br>stridia         | o__TA<br>NB77                     | f__CAG-<br>508                 | g__CAG-<br>269       | s__CAG-269<br>unknown_7             |
| MGYG-HGUT-00660:s__Collinsella unknown_40    | 0.2<br>80<br>55<br>88<br>87 | 0.3<br>00<br>67<br>01<br>13      | 0.9<br>29<br>02<br>59<br>13 | d_<br>_B<br>act<br>eri<br>a | p__A<br>ctino<br>bacte<br>riota | c__Co<br>riobac<br>teriia | o__Cor<br>iobact<br>eriales       | f__Cori<br>obacteri<br>aceae   | g__Collins<br>ella   | s__Collinsella<br>unknown_40        |
| MGYG-HGUT-00667:s__UBA7173 unknown_3         | 0.9<br>26<br>53<br>12<br>77 | -<br>0.0<br>25<br>89<br>38<br>57 | 0.9<br>94<br>47<br>94<br>74 | d_<br>_B<br>act<br>eri<br>a | p__B<br>acter<br>oidot<br>a     | c__Ba<br>cteroi<br>dia    | o__Bac<br>teroida<br>les          | f__Muri<br>baculac<br>eae      | g__UBA71<br>73       | s__UBA7173<br>unknown_3             |

|                                                     |             |              |             |             |                 |                  |                         |                         |                           |                                     |
|-----------------------------------------------------|-------------|--------------|-------------|-------------|-----------------|------------------|-------------------------|-------------------------|---------------------------|-------------------------------------|
| MGYG-HGUT-00668:s__CAG-145 unknown_1                | 0.775158268 | -0.079352098 | 0.979520484 | d__Bacteria | p__Firmicutes_A | c__Clostridia    | o__Peptostreptococcales | f__Anaerovoracaceae     | g__CAG-145                | s__CAG-145 unknown_1                |
| MGYG-HGUT-00669:s__CAG-488 sp000434055              | 0.529160623 | 0.1743365203 | 0.968532073 | d__Bacteria | p__Firmicutes_A | c__Clostridia    | o__Oscillospirales      | f__Acetivibrionaceae    | g__CAG-488                | s__CAG-488 sp000434055              |
| MGYG-HGUT-00670:s__Erysipelatoclostridium unknown_2 | 0.792352831 | 0.073331988  | 0.982966363 | d__Bacteria | p__Firmicutes   | c__Bacilli       | o__Erysipelotrichales   | f__Erysipelotrichaceae  | g__Erysipelatoclostridium | s__Erysipelatoclostridium unknown_2 |
| MGYG-HGUT-00671:s__Dialister sp002320515            | 0.635933577 | 0.132446262  | 0.975671757 | d__Bacteria | p__Firmicutes_C | c__Negativicutes | o__Veillonellales       | f__Dialisteraceae       | g__Dialister              | s__Dialister sp002320515            |
| MGYG-HGUT-00672:s__RC9 sp000431015                  | 0.43170997  | 0.218249367  | 0.950806594 | d__Bacteria | p__Bacteroidota | c__Bacteroidia   | o__Bacteroidales        | f__UBA932               | g__RC9                    | s__RC9 sp000431015                  |
| MGYG-HGUT-00674:s__Monoglobales unknown unknown_2   | 0.89073061  | -0.037714784 | 0.9944774   | d__Bacteria | p__Firmicutes_A | c__Clostridia    | o__Monoglobales         | f__Monoglobales unknown | g__Monoglobales unknown   | s__Monoglobales unknown unknown_2   |
| MGYG-HGUT-00675:s__Bacteroides congonensis          | 0.228233639 | -0.337180893 | 0.902181367 | d__Bacteria | p__Bacteroidota | c__Bacteroidia   | o__Bacteroidales        | f__Bacteroidaceae       | g__Bacteroides            | s__Bacteroides congonensis          |
| MGYG-HGUT-00680:s__Hungatella_A unknown_2           | 0.527901945 | 0.177125423  | 0.968532073 | d__Bacteria | p__Firmicutes_A | c__Clostridia    | o__Lachnospirales       | f__Lachnospiraceae      | g__Hungatella_A           | s__Hungatella_A unknown_2           |
| MGYG-HGUT-00681:s__Lactococcus raffinolactis        | 0.9498211   | 0.001574414  | 0.998803346 | d__Bacteria | p__Firmicutes   | c__Bacilli       | o__Lactobacillales      | f__Streptococcaceae     | g__Lactococcus            | s__Lactococcus raffinolactis        |

|                                                 |                             |                                  |                             |                             |                             |                        |                            |                                |                               |                                        |
|-------------------------------------------------|-----------------------------|----------------------------------|-----------------------------|-----------------------------|-----------------------------|------------------------|----------------------------|--------------------------------|-------------------------------|----------------------------------------|
| MGYG-HGUT-00682:s__UBA4334 unknown              | 0.6<br>42<br>36<br>26<br>48 | 0.1<br>24<br>62<br>78<br>37      | 0.9<br>75<br>67<br>17<br>57 | d_<br>_B<br>act<br>eri<br>a | p__B<br>acter<br>oidot<br>a | c__Ba<br>cteroi<br>dia | o__Bac<br>teroida<br>les   | f__Bact<br>eroidac<br>eae      | g__UBA43<br>34                | s__UBA4334<br>unknown                  |
| MGYG-HGUT-00685:s__CAG-590 unknown_2            | 0.1<br>27<br>19<br>48<br>87 | 0.4<br>23<br>43<br>75<br>08      | 0.8<br>91<br>82<br>55<br>59 | d_<br>_B<br>act<br>eri<br>a | p__Fi<br>rmicu<br>tes_A     | c__Clo<br>stridia      | o__Lac<br>hnospi<br>rales  | f__Lach<br>nospi<br>rac<br>eae | g__CAG-<br>590                | s__CAG-590<br>unknown_2                |
| MGYG-HGUT-00687:s__Anaerostipes unknown_1       | 0.2<br>17<br>46<br>35<br>28 | 0.3<br>32<br>42<br>40<br>12      | 0.8<br>91<br>82<br>55<br>59 | d_<br>_B<br>act<br>eri<br>a | p__Fi<br>rmicu<br>tes_A     | c__Clo<br>stridia      | o__Lac<br>hnospi<br>rales  | f__Lach<br>nospi<br>rac<br>eae | g__Anaero<br>stipes           | s__Anaerosti<br>pes<br>unknown_1       |
| MGYG-HGUT-00689:s__Angelakisella sp003453215    | 0.3<br>69<br>79<br>45<br>64 | 0.2<br>49<br>17<br>05<br>85      | 0.9<br>39<br>70<br>92<br>5  | d_<br>_B<br>act<br>eri<br>a | p__Fi<br>rmicu<br>tes_A     | c__Clo<br>stridia      | o__Os<br>cillospi<br>rales | f__Rumi<br>nococca<br>ceae     | g__Angela<br>kisella          | s__Angelakise<br>lla<br>sp003453215    |
| MGYG-HGUT-00690:s__CAG-590 sp000431135          | 0.8<br>36<br>10<br>94<br>24 | -<br>0.0<br>56<br>57<br>87<br>8  | 0.9<br>92<br>77<br>57<br>75 | d_<br>_B<br>act<br>eri<br>a | p__Fi<br>rmicu<br>tes_A     | c__Clo<br>stridia      | o__Lac<br>hnospi<br>rales  | f__Lach<br>nospi<br>rac<br>eae | g__CAG-<br>590                | s__CAG-590<br>sp000431135              |
| MGYG-HGUT-00691:s__CAG-110 unknown_2            | 0.6<br>83<br>61<br>12<br>18 | -<br>0.1<br>13<br>57<br>03<br>64 | 0.9<br>75<br>76<br>85<br>79 | d_<br>_B<br>act<br>eri<br>a | p__Fi<br>rmicu<br>tes_A     | c__Clo<br>stridia      | o__Os<br>cillospi<br>rales | f__Oscil<br>lospirac<br>eae    | g__CAG-<br>110                | s__CAG-110<br>unknown_2                |
| MGYG-HGUT-00692:s__Prevotellamassilia unknown_2 | 0.6<br>28<br>21<br>00<br>55 | 0.1<br>29<br>15<br>18<br>2       | 0.9<br>75<br>67<br>17<br>57 | d_<br>_B<br>act<br>eri<br>a | p__B<br>acter<br>oidot<br>a | c__Ba<br>cteroi<br>dia | o__Bac<br>teroida<br>les   | f__Bact<br>eroidac<br>eae      | g__Prevot<br>ellamassili<br>a | s__Prevotella<br>massilia<br>unknown_2 |
| MGYG-HGUT-00695:s__Prevotella sp000436035       | 0.6<br>07<br>84<br>22<br>87 | 0.1<br>39<br>40<br>78<br>01      | 0.9<br>75<br>67<br>17<br>57 | d_<br>_B<br>act<br>eri<br>a | p__B<br>acter<br>oidot<br>a | c__Ba<br>cteroi<br>dia | o__Bac<br>teroida<br>les   | f__Bact<br>eroidac<br>eae      | g__Prevot<br>ella             | s__Prevotella<br>sp000436035           |
| MGYG-HGUT-00696:s__Parabacteroides unknown_5    | 0.4<br>61<br>35<br>03<br>16 | 0.2<br>01<br>84<br>39<br>22      | 0.9<br>65<br>57<br>46<br>92 | d_<br>_B<br>act<br>eri<br>a | p__B<br>acter<br>oidot<br>a | c__Ba<br>cteroi<br>dia | o__Bac<br>teroida<br>les   | f__Tann<br>erellace<br>ae      | g__Paraba<br>cteroides        | s__Parabacte<br>roides<br>unknown_5    |

|                                            |             |              |               |             |                   |                        |                       |                        |                  |                            |
|--------------------------------------------|-------------|--------------|---------------|-------------|-------------------|------------------------|-----------------------|------------------------|------------------|----------------------------|
| MGYG-HGUT-00697:s__CAG-488 unknown_1       | 0.203913667 | 0.3517867    | 0.89182559    | d__Bacteria | p__Firmicutes_A   | c__Clostridia          | o__Oscillospirales    | f__Acetivibrionaceae   | g__CAG-488       | s__CAG-488 unknown_1       |
| MGYG-HGUT-00699:s__Solobacterium unknown_2 | 0.655549618 | -0.122394457 | 0.975671757   | d__Bacteria | p__Firmicutes     | c__Bacilli             | o__Erysipelotrichales | f__Erysipelotrichaceae | g__Solobacterium | s__Solobacterium unknown_2 |
| MGYG-HGUT-00701:s__Prevotella unknown_5    | 0.939676473 | 0.020817628  | 0.994479474   | d__Bacteria | p__Bacteroidota   | c__Bacteroidia         | o__Bacteroidales      | f__Bacteroidaceae      | g__Prevotella    | s__Prevotella unknown_5    |
| MGYG-HGUT-00702:s__Collinsella unknown_45  | 0.313390407 | 0.277896859  | 0.929025913   | d__Bacteria | p__Actinobacteria | c__Coriobacteriia      | o__Coriobacteriales   | f__Coriobacteriaceae   | g__Collinsella   | s__Collinsella unknown_45  |
| MGYG-HGUT-00703:s__CAG-83 unknown_1        | 0.163101778 | 0.365001366  | 0.89182559    | d__Bacteria | p__Firmicutes_A   | c__Clostridia          | o__Oscillospirales    | f__Oscillospiraceae    | g__CAG-83        | s__CAG-83 unknown_1        |
| MGYG-HGUT-00707:s__Prevotella unknown_6    | 0.368181788 | -0.24762925  | 0.93967170925 | d__Bacteria | p__Bacteroidota   | c__Bacteroidia         | o__Bacteroidales      | f__Bacteroidaceae      | g__Prevotella    | s__Prevotella unknown_6    |
| MGYG-HGUT-00708:s__Succinivibrio unknown_1 | 0.7692014   | 0.08237753   | 0.979520484   | d__Bacteria | p__Proteobacteria | c__Gammaproteobacteria | o__Enterobacteriales  | f__Succinivibrionaceae | g__Succinivibrio | s__Succinivibrio unknown_1 |
| MGYG-HGUT-00709:s__UBA738 unknown_1        | 0.991960165 | -0.0027763   | 0.998803346   | d__Bacteria | p__Firmicutes_A   | c__Clostridia          | o__Oscillospirales    | f__Oscillospiraceae    | g__UBA738        | s__UBA738 unknown_1        |
| MGYG-HGUT-00710:s__CAG-110 unknown_3       | 0.769021591 | -0.080647064 | 0.979520484   | d__Bacteria | p__Firmicutes_A   | c__Clostridia          | o__Oscillospirales    | f__Oscillospiraceae    | g__CAG-110       | s__CAG-110 unknown_3       |

|                                              |                             |                                  |                             |                             |                         |                          |                                     |                                |                           |                                    |
|----------------------------------------------|-----------------------------|----------------------------------|-----------------------------|-----------------------------|-------------------------|--------------------------|-------------------------------------|--------------------------------|---------------------------|------------------------------------|
| MGYG-HGUT-00711:s__CAG-145 unknown_2         | 0.0<br>03<br>86<br>90<br>35 | 0.7<br>88<br>67<br>18<br>51      | 0.6<br>48<br>12<br>43<br>72 | d_<br>_B<br>act<br>eri<br>a | p__Fi<br>rmicu<br>tes_A | c__Clo<br>stridia        | o__Pe<br>ptostre<br>ptococ<br>cales | f__Anae<br>rovorac<br>aceae    | g__CAG-<br>145            | s__CAG-145<br>unknown_2            |
| MGYG-HGUT-00713:s__CAG-83 unknown_2          | 0.0<br>54<br>40<br>91<br>82 | 0.5<br>10<br>99<br>18<br>55      | 0.8<br>57<br>21<br>13<br>2  | d_<br>_B<br>act<br>eri<br>a | p__Fi<br>rmicu<br>tes_A | c__Clo<br>stridia        | o__Os<br>cillospi<br>rales          | f__Oscil<br>lospirac<br>eae    | g__CAG-<br>83             | s__CAG-83<br>unknown_2             |
| MGYG-HGUT-00715:s__CAG-110 unknown_4         | 0.7<br>79<br>87<br>14<br>82 | 0.0<br>75<br>40<br>05<br>07      | 0.9<br>79<br>52<br>04<br>84 | d_<br>_B<br>act<br>eri<br>a | p__Fi<br>rmicu<br>tes_A | c__Clo<br>stridia        | o__Os<br>cillospi<br>rales          | f__Oscil<br>lospirac<br>eae    | g__CAG-<br>110            | s__CAG-110<br>unknown_4            |
| MGYG-HGUT-00718:s__CAG-138 unknown unknown_1 | 0.6<br>57<br>00<br>71<br>33 | 0.1<br>17<br>57<br>89<br>32      | 0.9<br>75<br>67<br>17<br>57 | d_<br>_B<br>act<br>eri<br>a | p__Fi<br>rmicu<br>tes_A | c__Clo<br>stridia        | o__Chr<br>istense<br>nellale<br>s   | f__CAG-<br>138                 | g__CAG-<br>138<br>unknown | s__CAG-138<br>unknown<br>unknown_1 |
| MGYG-HGUT-00721:s__NC2004 unknown            | 0.9<br>26<br>06<br>11<br>95 | 0.0<br>25<br>99<br>56<br>32      | 0.9<br>94<br>47<br>94<br>74 | d_<br>_B<br>act<br>eri<br>a | p__Fi<br>rmicu<br>tes_A | c__Clo<br>stridia        | o__Lac<br>hnospi<br>rales           | f__Lach<br>nospi<br>rac<br>eae | g__NC200<br>4             | s__NC2004<br>unknown               |
| MGYG-HGUT-00723:s__CAG-177 sp003514385       | 0.7<br>02<br>09<br>32<br>51 | -<br>0.1<br>04<br>89<br>35<br>18 | 0.9<br>79<br>45<br>84<br>75 | d_<br>_B<br>act<br>eri<br>a | p__Fi<br>rmicu<br>tes_A | c__Clo<br>stridia        | o__Os<br>cillospi<br>rales          | f__Acut<br>alibacte<br>raceae  | g__CAG-<br>177            | s__CAG-177<br>sp003514385          |
| MGYG-HGUT-00724:s__Gemmiger unknown_2        | 0.1<br>25<br>30<br>64<br>2  | 0.4<br>25<br>90<br>56<br>79      | 0.8<br>91<br>82<br>55<br>59 | d_<br>_B<br>act<br>eri<br>a | p__Fi<br>rmicu<br>tes_A | c__Clo<br>stridia        | o__Os<br>cillospi<br>rales          | f__Rumi<br>nococca<br>ceae     | g__Gemmi<br>ger           | s__Gemmiger<br>unknown_2           |
| MGYG-HGUT-00725:s__Dialister sp000434475     | 0.1<br>28<br>97<br>29<br>59 | 0.4<br>10<br>92<br>29<br>73      | 0.8<br>91<br>82<br>55<br>59 | d_<br>_B<br>act<br>eri<br>a | p__Fi<br>rmicu<br>tes_C | c__Ne<br>gativic<br>utes | o__Vei<br>llonella<br>les           | f__Diali<br>steracea<br>e      | g__Dialiste<br>r          | s__Dialister<br>sp000434475        |
| MGYG-HGUT-00726:s__CAG-180 unknown_1         | 0.9<br>10<br>94<br>58<br>29 | 0.0<br>29<br>83<br>34<br>31      | 0.9<br>94<br>47<br>94<br>74 | d_<br>_B<br>act<br>eri<br>a | p__Fi<br>rmicu<br>tes_A | c__Clo<br>stridia        | o__Os<br>cillospi<br>rales          | f__Acut<br>alibacte<br>raceae  | g__CAG-<br>180            | s__CAG-180<br>unknown_1            |

|                                              |                             |                                  |                             |                             |                             |                       |                                       |                                   |                               |                                        |
|----------------------------------------------|-----------------------------|----------------------------------|-----------------------------|-----------------------------|-----------------------------|-----------------------|---------------------------------------|-----------------------------------|-------------------------------|----------------------------------------|
| MGYG-HGUT-00728:s__UBA1255 unknown unknown_3 | 0.7<br>44<br>67<br>78<br>78 | -<br>0.0<br>88<br>85<br>42<br>86 | 0.9<br>79<br>45<br>84<br>75 | d_<br>_B<br>act<br>eri<br>a | p_<br>_Fi<br>rmicu<br>tes_A | c_<br>_Clo<br>stridia | o_<br>_UB<br>A1212                    | f_<br>_UBA<br>1255                | g_<br>_UBA12<br>55<br>unknown | s_<br>_UBA1255<br>unknown<br>unknown_3 |
| MGYG-HGUT-00729:s__F23-B02 unknown_2         | 0.2<br>87<br>79<br>78<br>29 | 0.2<br>87<br>22<br>61<br>49      | 0.9<br>29<br>02<br>59<br>13 | d_<br>_B<br>act<br>eri<br>a | p_<br>_Fi<br>rmicu<br>tes_A | c_<br>_Clo<br>stridia | o_<br>_Os<br>cillospi<br>rales        | f_<br>_Oscil<br>lospirac<br>eae   | g_<br>_F23-<br>B02            | s_<br>_F23-B02<br>unknown_2            |
| MGYG-HGUT-00730:s__Phil1 sp001940855         | 0.3<br>61<br>18<br>06<br>5  | -<br>0.2<br>46<br>76<br>78<br>58 | 0.9<br>39<br>70<br>92<br>5  | d_<br>_B<br>act<br>eri<br>a | p_<br>_Fi<br>rmicu<br>tes_A | c_<br>_Clo<br>stridia | o_<br>_Chr<br>istense<br>nellale<br>s | f_<br>_CAG-<br>138                | g_<br>_Phil1                  | s_<br>_Phil1<br>sp001940855            |
| MGYG-HGUT-00732:s__CAG-245 unknown_1         | 0.7<br>21<br>45<br>80<br>36 | -<br>0.0<br>99<br>09<br>94<br>63 | 0.9<br>79<br>45<br>84<br>75 | d_<br>_B<br>act<br>eri<br>a | p_<br>_Fi<br>rmicu<br>tes_A | c_<br>_Clo<br>stridia | o_<br>_TA<br>NB77                     | f_<br>_CAG-<br>508                | g_<br>_CAG-<br>245            | s_<br>_CAG-245<br>unknown_1            |
| MGYG-HGUT-00735:s__UBA738 unknown_2          | 0.4<br>01<br>79<br>14<br>05 | 0.2<br>28<br>75<br>06<br>15      | 0.9<br>39<br>70<br>92<br>5  | d_<br>_B<br>act<br>eri<br>a | p_<br>_Fi<br>rmicu<br>tes_A | c_<br>_Clo<br>stridia | o_<br>_Os<br>cillospi<br>rales        | f_<br>_Oscil<br>lospirac<br>eae   | g_<br>_UBA73<br>8             | s_<br>_UBA738<br>unknown_2             |
| MGYG-HGUT-00741:s__CAG-170 unknown_2         | 0.0<br>15<br>73<br>43<br>44 | 0.6<br>39<br>46<br>02<br>75      | 0.7<br>68<br>22<br>58<br>34 | d_<br>_B<br>act<br>eri<br>a | p_<br>_Fi<br>rmicu<br>tes_A | c_<br>_Clo<br>stridia | o_<br>_Os<br>cillospi<br>rales        | f_<br>_Oscil<br>lospirac<br>eae   | g_<br>_CAG-<br>170            | s_<br>_CAG-170<br>unknown_2            |
| MGYG-HGUT-00743:s__CAG-110 sp000434635       | 0.7<br>14<br>68<br>72<br>21 | -<br>0.0<br>99<br>22<br>61<br>99 | 0.9<br>79<br>45<br>84<br>75 | d_<br>_B<br>act<br>eri<br>a | p_<br>_Fi<br>rmicu<br>tes_A | c_<br>_Clo<br>stridia | o_<br>_Os<br>cillospi<br>rales        | f_<br>_Oscil<br>lospirac<br>eae   | g_<br>_CAG-<br>110            | s_<br>_CAG-110<br>sp000434635          |
| MGYG-HGUT-00746:s__UBA1777 unknown_1         | 0.7<br>84<br>60<br>83       | -<br>0.0<br>74<br>34<br>30<br>32 | 0.9<br>81<br>19<br>42<br>11 | d_<br>_B<br>act<br>eri<br>a | p_<br>_Fi<br>rmicu<br>tes_A | c_<br>_Clo<br>stridia | o_<br>_Os<br>cillospi<br>rales        | f_<br>_Oscil<br>lospirac<br>eae   | g_<br>_UBA17<br>77            | s_<br>_UBA1777<br>unknown_1            |
| MGYG-HGUT-00752:s__UBA737 unknown_4          | 0.9<br>44<br>54             | -<br>0.0<br>19                   | 0.9<br>94<br>47             | d_<br>_B<br>act             | p_<br>_Fi<br>rmicu<br>tes_A | c_<br>_Clo<br>stridia | o_<br>_Os<br>cillospi<br>rales        | f_<br>_Acut<br>alibacte<br>raceae | g_<br>_UBA73<br>7             | s_<br>_UBA737<br>unknown_4             |



|                                                |                             |                                   |                             |                             |                                 |                           |                             |                               |                        |                                       |
|------------------------------------------------|-----------------------------|-----------------------------------|-----------------------------|-----------------------------|---------------------------------|---------------------------|-----------------------------|-------------------------------|------------------------|---------------------------------------|
|                                                | 79<br>9                     | 45<br>96<br>27                    | 94<br>74                    | eri<br>a                    |                                 |                           |                             |                               |                        |                                       |
| MGYG-HGUT-00753:s__ER4 unknown_1               | 0.3<br>91<br>79<br>20<br>35 | 0.2<br>29<br>30<br>39<br>95       | 0.9<br>39<br>70<br>92<br>5  | d_<br>_B<br>act<br>eri<br>a | p__Fi<br>rmicu<br>tes_A         | c__Clo<br>stridia         | o__Os<br>cillospi<br>rales  | f__Oscil<br>lospirac<br>eae   | g__ER4                 | s__ER4<br>unknown_1                   |
| MGYG-HGUT-00754:s__Streptococcus unknown_5     | 0.7<br>11<br>06<br>17<br>54 | 0.1<br>04<br>12<br>45<br>93<br>26 | 0.9<br>79<br>45<br>84<br>75 | d_<br>_B<br>act<br>eri<br>a | p__Fi<br>rmicu<br>tes           | c__Ba<br>cilli            | o__Lac<br>tobacill<br>ales  | f__Stre<br>ptococc<br>aceae   | g__Strepto<br>coccus   | s__Streptococ<br>cus<br>unknown_5     |
| MGYG-HGUT-00756:s__Bifidobacterium sp002742445 | 0.6<br>37<br>72<br>36<br>4  | 0.1<br>28<br>07<br>01<br>14       | 0.9<br>75<br>67<br>17<br>57 | d_<br>_B<br>act<br>eri<br>a | p__A<br>ctino<br>bacte<br>riota | c__Ac<br>tinoba<br>cteria | o__Act<br>inomyc<br>etales  | f__Bifid<br>obacteri<br>aceae | g__Bifidob<br>acterium | s__Bifidobact<br>erium<br>sp002742445 |
| MGYG-HGUT-00759:s__Corynebacterium unknown_1   | 0.0<br>73<br>66<br>87<br>35 | 0.4<br>86<br>08<br>53<br>57       | 0.8<br>77<br>82<br>62<br>47 | d_<br>_B<br>act<br>eri<br>a | p__A<br>ctino<br>bacte<br>riota | c__Ac<br>tinoba<br>cteria | o__My<br>cobact<br>eriales  | f__Myc<br>obacteri<br>aceae   | g__Coryne<br>bacterium | s__Corynebac<br>terium<br>unknown_1   |
| MGYG-HGUT-00768:s__Collinsella unknown_50      | 0.0<br>53<br>59<br>90<br>95 | 0.5<br>28<br>20<br>45<br>91       | 0.8<br>57<br>21<br>13<br>2  | d_<br>_B<br>act<br>eri<br>a | p__A<br>ctino<br>bacte<br>riota | c__Co<br>riobac<br>teriia | o__Cor<br>iobact<br>eriales | f__Cori<br>obacteri<br>aceae  | g__Collins<br>ella     | s__Collinsella<br>unknown_50          |
| MGYG-HGUT-00769:s__Collinsella unknown_51      | 0.0<br>30<br>73<br>62<br>19 | 0.5<br>77<br>69<br>78<br>06       | 0.7<br>68<br>22<br>58<br>34 | d_<br>_B<br>act<br>eri<br>a | p__A<br>ctino<br>bacte<br>riota | c__Co<br>riobac<br>teriia | o__Cor<br>iobact<br>eriales | f__Cori<br>obacteri<br>aceae  | g__Collins<br>ella     | s__Collinsella<br>unknown_51          |
| MGYG-HGUT-00770:s__Collinsella unknown_52      | 0.0<br>33<br>74<br>96<br>27 | 0.5<br>86<br>62<br>96<br>33       | 0.7<br>68<br>22<br>58<br>34 | d_<br>_B<br>act<br>eri<br>a | p__A<br>ctino<br>bacte<br>riota | c__Co<br>riobac<br>teriia | o__Cor<br>iobact<br>eriales | f__Cori<br>obacteri<br>aceae  | g__Collins<br>ella     | s__Collinsella<br>unknown_52          |
| MGYG-HGUT-00771:s__Lactococcus lactis_E        | 0.9<br>77<br>06<br>87<br>33 | 0.0<br>08<br>01<br>54<br>08       | 0.9<br>96<br>58<br>78<br>01 | d_<br>_B<br>act<br>eri<br>a | p__Fi<br>rmicu<br>tes           | c__Ba<br>cilli            | o__Lac<br>tobacill<br>ales  | f__Stre<br>ptococc<br>aceae   | g__Lactoc<br>occus     | s__Lactococc<br>us lactis_E           |
| MGYG-HGUT-00774:s__Clostridium_M unknown_3     | 0.8<br>65<br>01<br>50<br>43 | -<br>0.0<br>47<br>08              | 0.9<br>94<br>47<br>94<br>74 | d_<br>_B<br>act<br>eri<br>a | p__Fi<br>rmicu<br>tes_A         | c__Clo<br>stridia         | o__Lac<br>hnospi<br>rales   | f__Lach<br>nospi<br>rales     | g__Clostri<br>dium_M   | s__Clostridiu<br>m_M<br>unknown_3     |

|                                               |                             |                                  |                             |                             |                                 |                           |                             |                              |                    |                                      |
|-----------------------------------------------|-----------------------------|----------------------------------|-----------------------------|-----------------------------|---------------------------------|---------------------------|-----------------------------|------------------------------|--------------------|--------------------------------------|
|                                               |                             | 99<br>88                         |                             |                             |                                 |                           |                             |                              |                    |                                      |
| MGYG-HGUT-00777:s__Collinsella unknown_54     | 0.0<br>24<br>76<br>73<br>47 | 0.6<br>11<br>92<br>51<br>52      | 0.7<br>68<br>22<br>58<br>34 | d_<br>_B<br>act<br>eri<br>a | p__A<br>ctino<br>bacte<br>riota | c__Co<br>riobac<br>teriia | o__Cor<br>iobact<br>eriales | f__Cori<br>obacteri<br>aceae | g__Collins<br>ella | s__Collinsella<br>unknown_54         |
| MGYG-HGUT-00778:s__Collinsella unknown_55     | 0.0<br>06<br>61<br>07<br>77 | 0.7<br>22<br>66<br>75<br>44      | 0.7<br>50<br>05<br>64<br>24 | d_<br>_B<br>act<br>eri<br>a | p__A<br>ctino<br>bacte<br>riota | c__Co<br>riobac<br>teriia | o__Cor<br>iobact<br>eriales | f__Cori<br>obacteri<br>aceae | g__Collins<br>ella | s__Collinsella<br>unknown_55         |
| MGYG-HGUT-00779:s__Prevotella sp000431975     | 0.3<br>28<br>00<br>24<br>49 | -<br>0.2<br>56<br>92<br>00<br>93 | 0.9<br>30<br>62<br>46<br>92 | d_<br>_B<br>act<br>eri<br>a | p__B<br>acter<br>oidot<br>a     | c__Ba<br>cteroi<br>dia    | o__Bac<br>teroida<br>les    | f__Bact<br>eroidac<br>eae    | g__Prevot<br>ella  | s__Prevotella<br>sp000431975         |
| MGYG-HGUT-00780:s__Collinsella unknown_56     | 0.3<br>72<br>25<br>55<br>17 | 0.2<br>41<br>66<br>26<br>19      | 0.9<br>39<br>70<br>92<br>5  | d_<br>_B<br>act<br>eri<br>a | p__A<br>ctino<br>bacte<br>riota | c__Co<br>riobac<br>teriia | o__Cor<br>iobact<br>eriales | f__Cori<br>obacteri<br>aceae | g__Collins<br>ella | s__Collinsella<br>unknown_56         |
| MGYG-HGUT-00784:s__CAG-417 sp000432835        | 0.7<br>42<br>30<br>03<br>93 | -<br>0.0<br>91<br>92<br>14<br>62 | 0.9<br>79<br>45<br>84<br>75 | d_<br>_B<br>act<br>eri<br>a | p__Fi<br>rmicu<br>tes           | c__Ba<br>cilli            | o__RF<br>39                 | f__CAG-<br>611               | g__CAG-<br>417     | s__CAG-417<br>sp000432835            |
| MGYG-HGUT-00787:s__Collinsella sp002232035_11 | 0.3<br>75<br>47<br>48<br>88 | 0.2<br>46<br>88<br>32<br>4       | 0.9<br>39<br>70<br>92<br>5  | d_<br>_B<br>act<br>eri<br>a | p__A<br>ctino<br>bacte<br>riota | c__Co<br>riobac<br>teriia | o__Cor<br>iobact<br>eriales | f__Cori<br>obacteri<br>aceae | g__Collins<br>ella | s__Collinsella<br>sp002232035<br>_11 |
| MGYG-HGUT-00788:s__Bacteroides pyogenes       | 0.5<br>63<br>80<br>30<br>86 | -<br>0.1<br>61<br>46<br>61<br>47 | 0.9<br>71<br>33<br>90<br>3  | d_<br>_B<br>act<br>eri<br>a | p__B<br>acter<br>oidot<br>a     | c__Ba<br>cteroi<br>dia    | o__Bac<br>teroida<br>les    | f__Bact<br>eroidac<br>eae    | g__Bacter<br>oides | s__Bacteroides<br>pyogenes           |
| MGYG-HGUT-00791:s__CAG-269 unknown_9          | 0.8<br>33<br>61<br>82<br>24 | -<br>0.0<br>58<br>93<br>08<br>77 | 0.9<br>92<br>22<br>01<br>9  | d_<br>_B<br>act<br>eri<br>a | p__Fi<br>rmicu<br>tes_A         | c__Clo<br>stridia         | o__TA<br>NB77               | f__CAG-<br>508               | g__CAG-<br>269     | s__CAG-269<br>unknown_9              |

|                                               |                             |                                  |                             |                             |                                 |                                        |                             |                                |                        |                                      |
|-----------------------------------------------|-----------------------------|----------------------------------|-----------------------------|-----------------------------|---------------------------------|----------------------------------------|-----------------------------|--------------------------------|------------------------|--------------------------------------|
| MGYG-HGUT-00793:s__Succinivibrio unknown_2    | 0.9<br>20<br>75<br>22<br>58 | 0.0<br>27<br>88<br>92            | 0.9<br>94<br>47<br>94<br>74 | d_<br>_B<br>act<br>eri<br>a | p__Pr<br>oteob<br>acteri<br>a   | c__Ga<br>mmap<br>roteo<br>bacteri<br>a | o__Ent<br>erobac<br>terales | f__Succi<br>nivibrio<br>naceae | g__Succini<br>vibrio   | s__Succinivibr<br>io unknown_2       |
| MGYG-HGUT-00795:s__Collinsella unknown_57     | 0.1<br>18<br>07<br>96<br>46 | -<br>0.4<br>35<br>07<br>39<br>84 | 0.8<br>83<br>30<br>72<br>56 | d_<br>_B<br>act<br>eri<br>a | p__A<br>ctino<br>bacte<br>riota | c__Co<br>riobac<br>teriia              | o__Cor<br>iobact<br>eriales | f__Cori<br>obacteri<br>aceae   | g__Collins<br>ella     | s__Collinsella<br>unknown_57         |
| MGYG-HGUT-00797:s__Collinsella unknown_58     | 0.8<br>24<br>23<br>86<br>56 | 0.0<br>61<br>43<br>11<br>1       | 0.9<br>91<br>14<br>89<br>31 | d_<br>_B<br>act<br>eri<br>a | p__A<br>ctino<br>bacte<br>riota | c__Co<br>riobac<br>teriia              | o__Cor<br>iobact<br>eriales | f__Cori<br>obacteri<br>aceae   | g__Collins<br>ella     | s__Collinsella<br>unknown_58         |
| MGYG-HGUT-00800:s__Fusobacterium_B unknown_2  | 0.8<br>31<br>41<br>57<br>25 | 0.0<br>59<br>72<br>85<br>3       | 0.9<br>92<br>22<br>01<br>9  | d_<br>_B<br>act<br>eri<br>a | p__F<br>usoba<br>cterio<br>ta   | c__Fu<br>sobact<br>eriia               | o__Fus<br>obacte<br>riales  | f__Fuso<br>bacteria<br>ceae    | g__Fusoba<br>cterium_B | s__Fusobacte<br>rium_B<br>unknown_2  |
| MGYG-HGUT-00801:s__Collinsella sp002232035_13 | 0.7<br>36<br>56<br>87<br>44 | -<br>0.0<br>93<br>77<br>04<br>64 | 0.9<br>79<br>45<br>84<br>75 | d_<br>_B<br>act<br>eri<br>a | p__A<br>ctino<br>bacte<br>riota | c__Co<br>riobac<br>teriia              | o__Cor<br>iobact<br>eriales | f__Cori<br>obacteri<br>aceae   | g__Collins<br>ella     | s__Collinsella<br>sp002232035<br>_13 |
| MGYG-HGUT-00805:s__Collinsella unknown_62     | 0.5<br>98<br>95<br>49<br>91 | 0.1<br>46<br>95<br>39<br>71      | 0.9<br>75<br>67<br>17<br>57 | d_<br>_B<br>act<br>eri<br>a | p__A<br>ctino<br>bacte<br>riota | c__Co<br>riobac<br>teriia              | o__Cor<br>iobact<br>eriales | f__Cori<br>obacteri<br>aceae   | g__Collins<br>ella     | s__Collinsella<br>unknown_62         |
| MGYG-HGUT-00806:s__Blautia_A unknown_7        | 0.6<br>30<br>31<br>58<br>09 | -<br>0.1<br>34<br>81<br>19<br>65 | 0.9<br>75<br>67<br>17<br>57 | d_<br>_B<br>act<br>eri<br>a | p__Fi<br>rmicu<br>tes_A         | c__Clo<br>stridia                      | o__Lac<br>hnospi<br>rales   | f__Lach<br>nospi<br>rac<br>eae | g__Blautia<br>_A       | s__Blautia_A<br>unknown_7            |
| MGYG-HGUT-00807:s__Anaerofustis unknown       | 0.8<br>01<br>07<br>01<br>36 | -<br>0.0<br>70<br>21<br>89<br>26 | 0.9<br>87<br>14<br>23<br>02 | d_<br>_B<br>act<br>eri<br>a | p__Fi<br>rmicu<br>tes_A         | c__Clo<br>stridia                      | o__Eu<br>bacteri<br>ales    | f__Anae<br>rofustac<br>eae     | g__Anaero<br>fustis    | s__Anaerofus<br>tis unknown          |
| MGYG-HGUT-00808:s__Oscillibacter unknown_3    | 0.3<br>88<br>61             | 0.2<br>35<br>75                  | 0.9<br>39<br>70             | d_<br>_B<br>act             | p__Fi<br>rmicu<br>tes_A         | c__Clo<br>stridia                      | o__Os<br>cillospi<br>rales  | f__Oscil<br>lospirac<br>eae    | g__Oscillib<br>acter   | s__Oscillibact<br>er<br>unknown_3    |

|                                               |                             |                                  |                             |                             |                                 |                           |                                   |                                          |                        |                                      |
|-----------------------------------------------|-----------------------------|----------------------------------|-----------------------------|-----------------------------|---------------------------------|---------------------------|-----------------------------------|------------------------------------------|------------------------|--------------------------------------|
|                                               | 08<br>7                     | 48<br>41                         | 92<br>5                     | eri<br>a                    |                                 |                           |                                   |                                          |                        |                                      |
| MGYG-HGUT-00811:s__Collinsella unknown_63     | 0.1<br>10<br>96<br>83<br>62 | 0.4<br>44<br>04<br>08<br>25      | 0.8<br>83<br>30<br>72<br>56 | d_<br>_B<br>act<br>eri<br>a | p__A<br>ctino<br>bacte<br>riota | c__Co<br>riobac<br>teriia | o__Cor<br>iobact<br>eriales       | f__Cori<br>obacteri<br>aceae             | g__Collins<br>ella     | s__Collinsella<br>unknown_63         |
| MGYG-HGUT-00817:s__Catenibacterium unknown_2  | 0.9<br>55<br>39<br>07<br>9  | -<br>0.0<br>15<br>39<br>66<br>03 | 0.9<br>94<br>47<br>94<br>74 | d_<br>_B<br>act<br>eri<br>a | p__Fi<br>rmicu<br>tes           | c__Ba<br>cilli            | o__Ery<br>sipelot<br>richale<br>s | f__Erysi<br>pelatocl<br>ostridia<br>ceae | g__Cateni<br>bacterium | s__Catenibact<br>erium<br>unknown_2  |
| MGYG-HGUT-00826:s__Collinsella unknown_65     | 0.2<br>99<br>40<br>81<br>03 | 0.2<br>89<br>99<br>76<br>43      | 0.9<br>29<br>02<br>59<br>13 | d_<br>_B<br>act<br>eri<br>a | p__A<br>ctino<br>bacte<br>riota | c__Co<br>riobac<br>teriia | o__Cor<br>iobact<br>eriales       | f__Cori<br>obacteri<br>aceae             | g__Collins<br>ella     | s__Collinsella<br>unknown_65         |
| MGYG-HGUT-00827:s__Collinsella sp002232035_14 | 0.9<br>53<br>85<br>45<br>08 | -<br>0.0<br>16<br>01<br>93<br>08 | 0.9<br>94<br>47<br>94<br>74 | d_<br>_B<br>act<br>eri<br>a | p__A<br>ctino<br>bacte<br>riota | c__Co<br>riobac<br>teriia | o__Cor<br>iobact<br>eriales       | f__Cori<br>obacteri<br>aceae             | g__Collins<br>ella     | s__Collinsella<br>sp002232035<br>_14 |
| MGYG-HGUT-00828:s__Eubacterium_I unknown_1    | 0.1<br>69<br>51<br>31<br>66 | 0.3<br>75<br>84<br>16<br>59      | 0.8<br>91<br>82<br>55<br>59 | d_<br>_B<br>act<br>eri<br>a | p__Fi<br>rmicu<br>tes_A         | c__Clo<br>stridia         | o__Lac<br>hnospi<br>rales         | f__Lach<br>nospirac<br>eae               | g__Eubact<br>erium_I   | s__Eubacteriu<br>m_I<br>unknown_1    |
| MGYG-HGUT-00830:s__Collinsella sp002232035_15 | 0.4<br>79<br>33<br>94<br>55 | -<br>0.1<br>95<br>68<br>45<br>66 | 0.9<br>68<br>53<br>20<br>73 | d_<br>_B<br>act<br>eri<br>a | p__A<br>ctino<br>bacte<br>riota | c__Co<br>riobac<br>teriia | o__Cor<br>iobact<br>eriales       | f__Cori<br>obacteri<br>aceae             | g__Collins<br>ella     | s__Collinsella<br>sp002232035<br>_15 |
| MGYG-HGUT-00833:s__Collinsella sp002232035_17 | 0.3<br>86<br>95<br>51<br>16 | 0.2<br>42<br>04<br>89<br>18      | 0.9<br>39<br>70<br>92<br>5  | d_<br>_B<br>act<br>eri<br>a | p__A<br>ctino<br>bacte<br>riota | c__Co<br>riobac<br>teriia | o__Cor<br>iobact<br>eriales       | f__Cori<br>obacteri<br>aceae             | g__Collins<br>ella     | s__Collinsella<br>sp002232035<br>_17 |
| MGYG-HGUT-00834:s__Oscillibacter unknown_4    | 0.0<br>79<br>37<br>17<br>08 | 0.4<br>58<br>43<br>93<br>03      | 0.8<br>77<br>82<br>62<br>47 | d_<br>_B<br>act<br>eri<br>a | p__Fi<br>rmicu<br>tes_A         | c__Clo<br>stridia         | o__Os<br>cillospi<br>rales        | f__Oscil<br>lospirac<br>eae              | g__Oscilib<br>acter    | s__Oscillibact<br>er<br>unknown_4    |
| MGYG-HGUT-00835:s__Collinsella sp002232035_18 | 0.9<br>85<br>46             | -<br>0.0<br>04                   | 0.9<br>98<br>80             | d_<br>_B<br>act             | p__A<br>ctino                   | c__Co<br>riobac<br>teriia | o__Cor<br>iobact<br>eriales       | f__Cori<br>obacteri<br>aceae             | g__Collins<br>ella     | s__Collinsella<br>sp002232035<br>_18 |

|                                              |                             |                                  |                             |                             |                                     |                               |                                      |                                       |                            |                                         |
|----------------------------------------------|-----------------------------|----------------------------------|-----------------------------|-----------------------------|-------------------------------------|-------------------------------|--------------------------------------|---------------------------------------|----------------------------|-----------------------------------------|
|                                              | 85<br>22                    | 99<br>87<br>17                   | 33<br>46                    | eri<br>a                    | bacte<br>riota                      |                               |                                      |                                       |                            |                                         |
| MGYG-HGUT-00837:s__Oscillibacter unknown_5   | 0.3<br>77<br>89<br>34<br>38 | 0.2<br>32<br>93<br>40<br>89      | 0.9<br>39<br>70<br>92<br>5  | d_<br>_B<br>act<br>eri<br>a | p_<br>_Fi<br>rmicu<br>tes_A         | c_<br>_Clo<br>stridia         | o_<br>_Os<br>cillospi<br>rales       | f_<br>_Oscil<br>lospirac<br>eae       | g_<br>_Oscilib<br>acter    | s_<br>_Oscillibact<br>er<br>unknown_5   |
| MGYG-HGUT-00838:s__Agathobaculum unknown_1   | 0.8<br>96<br>25<br>55<br>48 | -<br>0.0<br>36<br>09<br>71<br>05 | 0.9<br>94<br>47<br>94<br>74 | d_<br>_B<br>act<br>eri<br>a | p_<br>_Fi<br>rmicu<br>tes_A         | c_<br>_Clo<br>stridia         | o_<br>_Os<br>cillospi<br>rales       | f_<br>_Buty<br>ricicocc<br>aceae      | g_<br>_Agathob<br>aculum   | s_<br>_Agathobac<br>ulum<br>unknown_1   |
| MGYG-HGUT-00839:s__Clostridium unknown_2     | 0.3<br>45<br>69<br>09<br>68 | -<br>0.2<br>63<br>23<br>41<br>28 | 0.9<br>39<br>70<br>92<br>5  | d_<br>_B<br>act<br>eri<br>a | p_<br>_Fi<br>rmicu<br>tes_A         | c_<br>_Clo<br>stridia         | o_<br>_Clo<br>stridial<br>es         | f_<br>_Clost<br>ridiacea<br>e         | g_<br>_Clostri<br>dium     | s_<br>_Clostridiu<br>m<br>unknown_2     |
| MGYG-HGUT-00841:s__Oscillibacter unknown_6   | 0.6<br>68<br>47<br>44<br>22 | 0.1<br>15<br>63<br>00<br>6       | 0.9<br>75<br>67<br>17<br>57 | d_<br>_B<br>act<br>eri<br>a | p_<br>_Fi<br>rmicu<br>tes_A         | c_<br>_Clo<br>stridia         | o_<br>_Os<br>cillospi<br>rales       | f_<br>_Oscil<br>lospirac<br>eae       | g_<br>_Oscilib<br>acter    | s_<br>_Oscillibact<br>er<br>unknown_6   |
| MGYG-HGUT-00845:s__Collinsella unknown_67    | 0.9<br>08<br>56<br>35<br>83 | 0.0<br>31<br>56<br>37<br>58      | 0.9<br>94<br>47<br>94<br>74 | d_<br>_B<br>act<br>eri<br>a | p_<br>_A<br>ctino<br>bacte<br>riota | c_<br>_Co<br>riobac<br>teriia | o_<br>_Cor<br>iobact<br>eriales      | f_<br>_Cori<br>obacteri<br>aceae      | g_<br>_Collins<br>ella     | s_<br>_Collinsella<br>unknown_67        |
| MGYG-HGUT-00847:s__Acidaminococcus unknown_1 | 0.5<br>03<br>01<br>59<br>23 | 0.1<br>86<br>56<br>17<br>46      | 0.9<br>68<br>53<br>20<br>73 | d_<br>_B<br>act<br>eri<br>a | p_<br>_Fi<br>rmicu<br>tes_C         | c_<br>_Ne<br>gativic<br>utes  | o_<br>_Aci<br>damin<br>ococca<br>les | f_<br>_Acid<br>aminoc<br>occacea<br>e | g_<br>_Acidam<br>inococcus | s_<br>_Acidamino<br>coccus<br>unknown_1 |
| MGYG-HGUT-00855:s__Collinsella unknown_70    | 0.7<br>45<br>41<br>34<br>14 | -<br>0.0<br>89<br>89<br>32<br>97 | 0.9<br>79<br>45<br>84<br>75 | d_<br>_B<br>act<br>eri<br>a | p_<br>_A<br>ctino<br>bacte<br>riota | c_<br>_Co<br>riobac<br>teriia | o_<br>_Cor<br>iobact<br>eriales      | f_<br>_Cori<br>obacteri<br>aceae      | g_<br>_Collins<br>ella     | s_<br>_Collinsella<br>unknown_70        |
| MGYG-HGUT-00857:s__CAG-269 unknown_10        | 0.8<br>88<br>99<br>66<br>28 | -<br>0.0<br>39<br>20<br>45<br>15 | 0.9<br>94<br>47<br>94<br>74 | d_<br>_B<br>act<br>eri<br>a | p_<br>_Fi<br>rmicu<br>tes_A         | c_<br>_Clo<br>stridia         | o_<br>_TA<br>NB77                    | f_<br>_CAG-<br>508                    | g_<br>_CAG-<br>269         | s_<br>_CAG-269<br>unknown_10            |

|                                               |                             |                                  |                             |                             |                                      |                                 |                                   |                                |                         |                                      |
|-----------------------------------------------|-----------------------------|----------------------------------|-----------------------------|-----------------------------|--------------------------------------|---------------------------------|-----------------------------------|--------------------------------|-------------------------|--------------------------------------|
| MGYG-HGUT-00858:s__Collinsella unknown_72     | 0.7<br>71<br>20<br>84<br>97 | 0.0<br>80<br>46<br>11<br>19      | 0.9<br>79<br>52<br>04<br>84 | d_<br>_B<br>act<br>eri<br>a | p__A<br>ctino<br>bacte<br>riota      | c__Co<br>riobac<br>teriia       | o__Cor<br>iobact<br>eriales       | f__Cori<br>obacteri<br>aceae   | g__Collins<br>ella      | s__Collinsella<br>unknown_72         |
| MGYG-HGUT-00859:s__Tyzzerella unknown_1       | 0.1<br>95<br>21<br>44<br>79 | -<br>0.3<br>58<br>22<br>13<br>43 | 0.8<br>91<br>82<br>55<br>59 | d_<br>_B<br>act<br>eri<br>a | p__Fi<br>rmicu<br>tes_A              | c__Clo<br>stridia               | o__Lac<br>hnospi<br>rales         | f__Lach<br>nospi<br>rac<br>eae | g__Tyzzer<br>ella       | s__Tyzzerella<br>unknown_1           |
| MGYG-HGUT-00862:s__Collinsella unknown_73     | 0.9<br>24<br>42<br>11<br>74 | -<br>0.0<br>26<br>33<br>73<br>82 | 0.9<br>94<br>47<br>94<br>74 | d_<br>_B<br>act<br>eri<br>a | p__A<br>ctino<br>bacte<br>riota      | c__Co<br>riobac<br>teriia       | o__Cor<br>iobact<br>eriales       | f__Cori<br>obacteri<br>aceae   | g__Collins<br>ella      | s__Collinsella<br>unknown_73         |
| MGYG-HGUT-00864:s__CAG-632 unknown_2          | 0.9<br>90<br>36<br>66<br>15 | -<br>0.0<br>03<br>28<br>57<br>09 | 0.9<br>98<br>80<br>33<br>46 | d_<br>_B<br>act<br>eri<br>a | p__Fi<br>rmicu<br>tes_A              | c__Clo<br>stridia               | o__Lac<br>hnospi<br>rales         | f__Lach<br>nospi<br>rac<br>eae | g__CAG-<br>632          | s__CAG-632<br>unknown_2              |
| MGYG-HGUT-00865:s__Collinsella unknown_74     | 0.1<br>52<br>60<br>37<br>74 | 0.3<br>99<br>29<br>18<br>62      | 0.8<br>91<br>82<br>55<br>59 | d_<br>_B<br>act<br>eri<br>a | p__A<br>ctino<br>bacte<br>riota      | c__Co<br>riobac<br>teriia       | o__Cor<br>iobact<br>eriales       | f__Cori<br>obacteri<br>aceae   | g__Collins<br>ella      | s__Collinsella<br>unknown_74         |
| MGYG-HGUT-00867:s__UBA1409 sp002338885        | 0.3<br>44<br>03<br>60<br>8  | -<br>0.2<br>63<br>00<br>51<br>06 | 0.9<br>39<br>70<br>92<br>5  | d_<br>_B<br>act<br>eri<br>a | p__Fi<br>rmicu<br>tes_A              | c__Clo<br>stridia               | o__Os<br>cillospi<br>rales        | f__Rumi<br>nococca<br>ceae     | g__UBA14<br>09          | s__UBA1409<br>sp002338885            |
| MGYG-HGUT-00868:s__Collinsella unknown_75     | 0.7<br>94<br>40<br>49<br>26 | 0.0<br>69<br>56<br>14<br>1       | 0.9<br>82<br>96<br>63       | d_<br>_B<br>act<br>eri<br>a | p__A<br>ctino<br>bacte<br>riota      | c__Co<br>riobac<br>teriia       | o__Cor<br>iobact<br>eriales       | f__Cori<br>obacteri<br>aceae   | g__Collins<br>ella      | s__Collinsella<br>unknown_75         |
| MGYG-HGUT-00870:s__Akkermansia unknown_1      | 0.7<br>00<br>89<br>09<br>94 | 0.1<br>06<br>82<br>36<br>4       | 0.9<br>79<br>45<br>84<br>75 | d_<br>_B<br>act<br>eri<br>a | p__V<br>erruc<br>omicr<br>obiot<br>a | c__Ve<br>rruco<br>micro<br>biae | o__Ver<br>rucomi<br>crobial<br>es | f__Akke<br>rmansia<br>ceae     | g__Akker<br>mansia      | s__Akkerman<br>sia<br>unknown_1      |
| MGYG-HGUT-00876:s__Faecalibacterium unknown_4 | 0.1<br>48<br>22             | 0.3<br>95<br>84                  | 0.8<br>91<br>82             | d_<br>_B<br>act             | p__Fi<br>rmicu<br>tes_A              | c__Clo<br>stridia               | o__Os<br>cillospi<br>rales        | f__Rumi<br>nococca<br>ceae     | g__Faecali<br>bacterium | s__Faecalibac<br>terium<br>unknown_4 |

|                                           |                             |                                  |                             |                             |                                 |                           |                             |                              |                        |                                      |
|-------------------------------------------|-----------------------------|----------------------------------|-----------------------------|-----------------------------|---------------------------------|---------------------------|-----------------------------|------------------------------|------------------------|--------------------------------------|
|                                           | 38<br>82                    | 48<br>1                          | 55<br>59                    | eri<br>a                    |                                 |                           |                             |                              |                        |                                      |
| MGYG-HGUT-00877:s__CAG-83 unknown_3       | 0.0<br>81<br>54<br>40<br>16 | 0.4<br>62<br>14<br>51<br>45      | 0.8<br>77<br>82<br>62<br>47 | d_<br>_B<br>act<br>eri<br>a | p__Fi<br>rmicu<br>tes_A         | c__Clo<br>stridia         | o__Os<br>cillospi<br>rales  | f__Oscil<br>lospirac<br>eae  | g__CAG-<br>83          | s__CAG-83<br>unknown_3               |
| MGYG-HGUT-00879:s__Collinsella unknown_77 | 0.9<br>53<br>26<br>75<br>14 | -<br>0.0<br>16<br>39<br>66<br>34 | 0.9<br>94<br>47<br>94<br>74 | d_<br>_B<br>act<br>eri<br>a | p__A<br>ctino<br>bacte<br>riota | c__Co<br>riobac<br>teriia | o__Cor<br>iobact<br>eriales | f__Cori<br>obacteri<br>aceae | g__Collins<br>ella     | s__Collinsella<br>unknown_77         |
| MGYG-HGUT-00880:s__Collinsella unknown_78 | 0.8<br>56<br>98<br>43<br>5  | 0.0<br>50<br>14<br>81<br>74      | 0.9<br>92<br>87<br>80<br>88 | d_<br>_B<br>act<br>eri<br>a | p__A<br>ctino<br>bacte<br>riota | c__Co<br>riobac<br>teriia | o__Cor<br>iobact<br>eriales | f__Cori<br>obacteri<br>aceae | g__Collins<br>ella     | s__Collinsella<br>unknown_78         |
| MGYG-HGUT-00881:s__Collinsella unknown_79 | 0.5<br>40<br>20<br>01<br>34 | -<br>0.1<br>69<br>83<br>73<br>35 | 0.9<br>68<br>53<br>20<br>73 | d_<br>_B<br>act<br>eri<br>a | p__A<br>ctino<br>bacte<br>riota | c__Co<br>riobac<br>teriia | o__Cor<br>iobact<br>eriales | f__Cori<br>obacteri<br>aceae | g__Collins<br>ella     | s__Collinsella<br>unknown_79         |
| MGYG-HGUT-00883:s__CAG-170 unknown_3      | 0.4<br>25<br>71<br>79<br>53 | 0.2<br>21<br>06<br>91<br>47      | 0.9<br>48<br>39<br>70<br>24 | d_<br>_B<br>act<br>eri<br>a | p__Fi<br>rmicu<br>tes_A         | c__Clo<br>stridia         | o__Os<br>cillospi<br>rales  | f__Oscil<br>lospirac<br>eae  | g__CAG-<br>170         | s__CAG-170<br>unknown_3              |
| MGYG-HGUT-00884:s__CAG-103 sp900317855_1  | 0.5<br>00<br>08<br>57<br>08 | -<br>0.1<br>86<br>14<br>25<br>87 | 0.9<br>68<br>53<br>20<br>73 | d_<br>_B<br>act<br>eri<br>a | p__Fi<br>rmicu<br>tes_A         | c__Clo<br>stridia         | o__Os<br>cillospi<br>rales  | f__Oscil<br>lospirac<br>eae  | g__CAG-<br>103         | s__CAG-103<br>sp900317855<br>_1      |
| MGYG-HGUT-00888:s__ER4 unknown_2          | 0.4<br>11<br>63<br>95<br>16 | 0.2<br>19<br>88<br>55<br>9       | 0.9<br>39<br>70<br>92<br>5  | d_<br>_B<br>act<br>eri<br>a | p__Fi<br>rmicu<br>tes_A         | c__Clo<br>stridia         | o__Os<br>cillospi<br>rales  | f__Oscil<br>lospirac<br>eae  | g__ER4                 | s__ER4<br>unknown_2                  |
| MGYG-HGUT-00892:s__CAG-115 sp002492075    | 0.4<br>15<br>41<br>42<br>19 | 0.2<br>23<br>13<br>84<br>16      | 0.9<br>39<br>70<br>92<br>5  | d_<br>_B<br>act<br>eri<br>a | p__Fi<br>rmicu<br>tes_A         | c__Clo<br>stridia         | o__Os<br>cillospi<br>rales  | f__Rumi<br>nococca<br>ceae   | g__CAG-<br>115         | s__CAG-115<br>sp002492075            |
| MGYG-HGUT-00901:s__Acidami                | 0.4<br>05<br>27             | 0.2<br>25<br>02                  | 0.9<br>39<br>70             | d_<br>_B<br>act             | p__Fi<br>rmicu<br>tes_C         | c__Ne<br>gativic<br>utes  | o__Aci<br>damin             | f__Acid<br>aminoc            | g__Acidam<br>inococcus | s__Acidamino<br>coccus<br>fermentans |

|                                                    |                             |                                  |                             |                             |                                 |                           |                                  |                                   |                                  |                                       |
|----------------------------------------------------|-----------------------------|----------------------------------|-----------------------------|-----------------------------|---------------------------------|---------------------------|----------------------------------|-----------------------------------|----------------------------------|---------------------------------------|
| nococcus fermentans                                | 58<br>89                    | 99<br>45                         | 92<br>5                     | eri<br>a                    |                                 |                           | ococca<br>les                    | occacea<br>e                      |                                  |                                       |
| MGYG-HGUT-00904:s__Collinsella unknown_83          | 0.4<br>59<br>71<br>01<br>44 | 0.2<br>05<br>26<br>92<br>38      | 0.9<br>65<br>57<br>46<br>92 | d_<br>_B<br>act<br>eri<br>a | p__A<br>ctino<br>bacte<br>riota | c__Co<br>riobac<br>teriia | o__Cor<br>iobact<br>eriales      | f__Cori<br>obacteri<br>aceae      | g__Collins<br>ella               | s__Collinsella<br>unknown_83          |
| MGYG-HGUT-00909:s__UBA9502 unknown_3               | 0.9<br>95<br>23<br>83<br>13 | 0.0<br>01<br>63<br>82<br>46      | 0.9<br>98<br>80<br>33<br>46 | d_<br>_B<br>act<br>eri<br>a | p__Fi<br>rmicu<br>tes_A         | c__Clo<br>stridia         | o__Lac<br>hnospi<br>rales        | f__Lach<br>nospirac<br>eae        | g__UBA95<br>02                   | s__UBA9502<br>unknown_3               |
| MGYG-HGUT-00911:s__Slackia_A unknown_1             | 0.7<br>87<br>55<br>69<br>08 | -<br>0.0<br>74<br>93<br>78<br>14 | 0.9<br>82<br>79<br>62<br>25 | d_<br>_B<br>act<br>eri<br>a | p__A<br>ctino<br>bacte<br>riota | c__Co<br>riobac<br>teriia | o__Cor<br>iobact<br>eriales      | f__Egge<br>rthellac<br>eae        | g__Slackia<br>_A                 | s__Slackia_A<br>unknown_1             |
| MGYG-HGUT-00912:s__Collinsella sp002232035_19      | 0.8<br>32<br>23<br>37<br>64 | 0.0<br>57<br>57<br>43<br>6       | 0.9<br>92<br>22<br>01<br>9  | d_<br>_B<br>act<br>eri<br>a | p__A<br>ctino<br>bacte<br>riota | c__Co<br>riobac<br>teriia | o__Cor<br>iobact<br>eriales      | f__Cori<br>obacteri<br>aceae      | g__Collins<br>ella               | s__Collinsella<br>sp002232035<br>_19  |
| MGYG-HGUT-00913:s__Blautia unknown_1               | 0.7<br>67<br>18<br>32<br>49 | 0.0<br>82<br>74<br>78<br>17      | 0.9<br>79<br>52<br>04<br>84 | d_<br>_B<br>act<br>eri<br>a | p__Fi<br>rmicu<br>tes_A         | c__Clo<br>stridia         | o__Lac<br>hnospi<br>rales        | f__Lach<br>nospirac<br>eae        | g__Blautia                       | s__Blautia<br>unknown_1               |
| MGYG-HGUT-00917:s__Phascolarctobacterium unknown_1 | 0.3<br>97<br>91<br>05<br>22 | 0.2<br>35<br>89<br>72<br>53      | 0.9<br>39<br>70<br>92<br>5  | d_<br>_B<br>act<br>eri<br>a | p__Fi<br>rmicu<br>tes_C         | c__Ne<br>gativic<br>utes  | o__Aci<br>damin<br>ococca<br>les | f__Acid<br>aminoc<br>occacea<br>e | g__Phasco<br>larctobact<br>erium | s__Phascolarctobacterium<br>unknown_1 |
| MGYG-HGUT-00920:s__Gemmiger unknown_3              | 0.8<br>08<br>94<br>54<br>45 | 0.0<br>67<br>86<br>28<br>65      | 0.9<br>87<br>14<br>23<br>02 | d_<br>_B<br>act<br>eri<br>a | p__Fi<br>rmicu<br>tes_A         | c__Clo<br>stridia         | o__Os<br>cillospi<br>rales       | f__Rumi<br>nococca<br>ceae        | g__Gemmi<br>ger                  | s__Gemmiger<br>unknown_3              |
| MGYG-HGUT-00923:s__Bacteroides_C unknown           | 0.4<br>49<br>88<br>39<br>68 | -<br>0.2<br>11<br>93<br>65<br>21 | 0.9<br>61<br>29<br>22<br>08 | d_<br>_B<br>act<br>eri<br>a | p__B<br>acter<br>oidot<br>a     | c__Ba<br>cteroi<br>dia    | o__Bac<br>teroida<br>les         | f__Bact<br>eroidac<br>eae         | g__Bacter<br>oides_C             | s__Bacteroides_C<br>unknown           |
| MGYG-HGUT-00926:s__Veillonella unknown_5           | 0.6<br>39<br>61             | -<br>0.1<br>30<br>95             | 0.9<br>75<br>67             | d_<br>_B<br>act             | p__Fi<br>rmicu<br>tes_C         | c__Ne<br>gativic<br>utes  | o__Vei<br>llonella<br>les        | f__Veill<br>onellace<br>ae        | g__Veillon<br>ella               | s__Veillonella<br>unknown_5           |



|                                                          |                             |                                  |                             |                             |                                 |                           |                             |                               |                                       |                                                    |
|----------------------------------------------------------|-----------------------------|----------------------------------|-----------------------------|-----------------------------|---------------------------------|---------------------------|-----------------------------|-------------------------------|---------------------------------------|----------------------------------------------------|
|                                                          | 37<br>56                    | 00<br>05                         | 17<br>57                    | eri<br>a                    |                                 |                           |                             |                               |                                       |                                                    |
| MGYG-HGUT-00929:s__CAG-273 sp000437855                   | 0.4<br>91<br>22<br>66<br>21 | -<br>0.1<br>88<br>90<br>43<br>82 | 0.9<br>68<br>53<br>20<br>73 | d_<br>_B<br>act<br>eri<br>a | p__Fi<br>rmicu<br>tes_A         | c__Clo<br>stridia         | o__TA<br>NB77               | f__CAG-<br>508                | g__CAG-<br>273                        | s__CAG-273<br>sp000437855                          |
| MGYG-HGUT-00932:s__Acutalibacteraceae unknown unknown_8  | 0.4<br>88<br>39<br>31<br>85 | 0.1<br>93<br>52<br>26<br>52      | 0.9<br>68<br>53<br>20<br>73 | d_<br>_B<br>act<br>eri<br>a | p__Fi<br>rmicu<br>tes_A         | c__Clo<br>stridia         | o__Os<br>cillospi<br>rales  | f__Acut<br>alibacte<br>raceae | g__Acutali<br>bacteracea<br>e unknown | s__Acutalibac<br>teraceae<br>unknown<br>unknown_8  |
| MGYG-HGUT-00934:s__Collinsella unknown_88                | 0.5<br>01<br>18<br>75<br>07 | 0.1<br>84<br>01<br>07<br>62      | 0.9<br>68<br>53<br>20<br>73 | d_<br>_B<br>act<br>eri<br>a | p__A<br>ctino<br>bacte<br>riota | c__Co<br>riobac<br>teriia | o__Cor<br>iobact<br>eriales | f__Cori<br>obacteri<br>aceae  | g__Collins<br>ella                    | s__Collinsella<br>unknown_88                       |
| MGYG-HGUT-00935:s__Acutalibacteraceae unknown unknown_9  | 0.5<br>82<br>11<br>33<br>48 | -<br>0.1<br>54<br>59<br>51<br>73 | 0.9<br>75<br>67<br>17<br>57 | d_<br>_B<br>act<br>eri<br>a | p__Fi<br>rmicu<br>tes_A         | c__Clo<br>stridia         | o__Os<br>cillospi<br>rales  | f__Acut<br>alibacte<br>raceae | g__Acutali<br>bacteracea<br>e unknown | s__Acutalibac<br>teraceae<br>unknown<br>unknown_9  |
| MGYG-HGUT-00936:s__Collinsella unknown_89                | 0.0<br>89<br>84<br>74<br>15 | 0.4<br>64<br>50<br>00<br>93      | 0.8<br>83<br>30<br>72<br>56 | d_<br>_B<br>act<br>eri<br>a | p__A<br>ctino<br>bacte<br>riota | c__Co<br>riobac<br>teriia | o__Cor<br>iobact<br>eriales | f__Cori<br>obacteri<br>aceae  | g__Collins<br>ella                    | s__Collinsella<br>unknown_89                       |
| MGYG-HGUT-00937:s__Acutalibacteraceae unknown unknown_10 | 0.1<br>05<br>29<br>74<br>66 | 0.4<br>50<br>75<br>57<br>92      | 0.8<br>83<br>30<br>72<br>56 | d_<br>_B<br>act<br>eri<br>a | p__Fi<br>rmicu<br>tes_A         | c__Clo<br>stridia         | o__Os<br>cillospi<br>rales  | f__Acut<br>alibacte<br>raceae | g__Acutali<br>bacteracea<br>e unknown | s__Acutalibac<br>teraceae<br>unknown<br>unknown_10 |
| MGYG-HGUT-00938:s__UBA5446 unknown_2                     | 0.4<br>20<br>95<br>52<br>39 | 0.2<br>17<br>22<br>38<br>72      | 0.9<br>42<br>00<br>63<br>55 | d_<br>_B<br>act<br>eri<br>a | p__Fi<br>rmicu<br>tes_A         | c__Clo<br>stridia         | o__Os<br>cillospi<br>rales  | f__Oscil<br>lospirac<br>eae   | g__UBA54<br>46                        | s__UBA5446<br>unknown_2                            |
| MGYG-HGUT-00940:s__Collinsella unknown_90                | 0.0<br>79<br>33<br>03<br>66 | 0.4<br>86<br>97<br>55<br>76      | 0.8<br>77<br>82<br>62<br>47 | d_<br>_B<br>act<br>eri<br>a | p__A<br>ctino<br>bacte<br>riota | c__Co<br>riobac<br>teriia | o__Cor<br>iobact<br>eriales | f__Cori<br>obacteri<br>aceae  | g__Collins<br>ella                    | s__Collinsella<br>unknown_90                       |
| MGYG-HGUT-00942:s__CAG-314 unknown unknown_1             | 0.5<br>06<br>54             | 0.1<br>85<br>85                  | 0.9<br>68<br>53             | d_<br>_B<br>act             | p__Fi<br>rmicu<br>tes_A         | c__Clo<br>stridia         | o__4C<br>28d-15             | f__CAG-<br>314                | g__CAG-<br>314<br>unknown             | s__CAG-314<br>unknown<br>unknown_1                 |

|                                            |                             |                                  |                             |                             |                                 |                           |                                |                              |                      |                                   |
|--------------------------------------------|-----------------------------|----------------------------------|-----------------------------|-----------------------------|---------------------------------|---------------------------|--------------------------------|------------------------------|----------------------|-----------------------------------|
|                                            | 92<br>34                    | 39<br>55                         | 20<br>73                    | eri<br>a                    |                                 |                           |                                |                              |                      |                                   |
| MGYG-HGUT-00947:s__Collinsella unknown_91  | 0.1<br>32<br>37<br>14<br>16 | 0.4<br>10<br>66<br>10<br>19      | 0.8<br>91<br>82<br>55<br>59 | d_<br>_B<br>act<br>eri<br>a | p__A<br>ctino<br>bacte<br>riota | c__Co<br>riobac<br>teriia | o__Cor<br>iobact<br>eriales    | f__Cori<br>obacteri<br>aceae | g__Collins<br>ella   | s__Collinsella<br>unknown_91      |
| MGYG-HGUT-00949:s__Collinsella unknown_92  | 0.0<br>98<br>28<br>35<br>97 | 0.4<br>47<br>34<br>07<br>91      | 0.8<br>83<br>30<br>72<br>56 | d_<br>_B<br>act<br>eri<br>a | p__A<br>ctino<br>bacte<br>riota | c__Co<br>riobac<br>teriia | o__Cor<br>iobact<br>eriales    | f__Cori<br>obacteri<br>aceae | g__Collins<br>ella   | s__Collinsella<br>unknown_92      |
| MGYG-HGUT-00954:s__Blautia_A unknown_8     | 0.0<br>33<br>34<br>15<br>52 | 0.5<br>34<br>42<br>17<br>33      | 0.7<br>68<br>22<br>58<br>34 | d_<br>_B<br>act<br>eri<br>a | p__Fi<br>rmicu<br>tes_A         | c__Clo<br>stridia         | o__Lac<br>hnospi<br>rales      | f__Lach<br>nospirac<br>eae   | g__Blautia<br>_A     | s__Blautia_A<br>unknown_8         |
| MGYG-HGUT-00957:s__Prevotella sp000436695  | 0.6<br>62<br>21<br>29<br>38 | -<br>0.1<br>21<br>56<br>22<br>64 | 0.9<br>75<br>67<br>17<br>57 | d_<br>_B<br>act<br>eri<br>a | p__B<br>acter<br>oidot<br>a     | c__Ba<br>cteroi<br>dia    | o__Bac<br>teroida<br>les       | f__Bact<br>eroidac<br>eae    | g__Prevot<br>ella    | s__Prevotella<br>sp000436695      |
| MGYG-HGUT-00959:s__Ruminococcus unknown_1  | 0.3<br>91<br>79<br>80<br>17 | 0.2<br>38<br>81<br>41<br>98      | 0.9<br>39<br>70<br>92<br>5  | d_<br>_B<br>act<br>eri<br>a | p__Fi<br>rmicu<br>tes_A         | c__Clo<br>stridia         | o__Os<br>cillospi<br>rales     | f__Rumi<br>nococca<br>ceae   | g__Rumin<br>ococcus  | s__Ruminoco<br>ccus<br>unknown_1  |
| MGYG-HGUT-00961:s__Megamonas unknown_2     | 0.6<br>36<br>34<br>37<br>4  | 0.1<br>31<br>10<br>10<br>93      | 0.9<br>75<br>67<br>17<br>57 | d_<br>_B<br>act<br>eri<br>a | p__Fi<br>rmicu<br>tes_C         | c__Ne<br>gativic<br>utes  | o__Sel<br>enomo<br>nadale<br>s | f__Sele<br>nomona<br>daceae  | g__Mega<br>monas     | s__Megamon<br>as<br>unknown_2     |
| MGYG-HGUT-00963:s__CAG-617 unknown_1       | 0.5<br>45<br>37<br>84<br>83 | 0.1<br>68<br>49<br>97<br>34      | 0.9<br>68<br>53<br>20<br>73 | d_<br>_B<br>act<br>eri<br>a | p__B<br>acter<br>oidot<br>a     | c__Ba<br>cteroi<br>dia    | o__Bac<br>teroida<br>les       | f__Bact<br>eroidac<br>eae    | g__CAG-<br>617       | s__CAG-617<br>unknown_1           |
| MGYG-HGUT-00966:s__Blautia_A unknown_9     | 0.8<br>90<br>11<br>67<br>06 | 0.0<br>38<br>51<br>98<br>08      | 0.9<br>94<br>47<br>94<br>74 | d_<br>_B<br>act<br>eri<br>a | p__Fi<br>rmicu<br>tes_A         | c__Clo<br>stridia         | o__Lac<br>hnospi<br>rales      | f__Lach<br>nospirac<br>eae   | g__Blautia<br>_A     | s__Blautia_A<br>unknown_9         |
| MGYG-HGUT-00969:s__Eubacterium_I unknown_2 | 0.5<br>59<br>50<br>99<br>84 | 0.1<br>58<br>43<br>71<br>83      | 0.9<br>68<br>84<br>14<br>16 | d_<br>_B<br>act<br>eri<br>a | p__Fi<br>rmicu<br>tes_A         | c__Clo<br>stridia         | o__Lac<br>hnospi<br>rales      | f__Lach<br>nospirac<br>eae   | g__Eubact<br>erium_I | s__Eubacteriu<br>m_I<br>unknown_2 |

|                                                |             |                |             |             |                   |                   |                     |                      |                 |                                |
|------------------------------------------------|-------------|----------------|-------------|-------------|-------------------|-------------------|---------------------|----------------------|-----------------|--------------------------------|
| MGYG-HGUT-00979:s__Collinsella unknown_94      | 0.358150587 | 0.246808615    | 0.93970925  | d__Bacteria | p__Actinobacteria | c__Coriobacteriia | o__Coriobacteriales | f__Coriobacteriaceae | g__Collinsella  | s__Collinsella unknown_94      |
| MGYG-HGUT-00981:s__Collinsella unknown_95      | 0.522164007 | 0.177514841    | 0.968532073 | d__Bacteria | p__Actinobacteria | c__Coriobacteriia | o__Coriobacteriales | f__Coriobacteriaceae | g__Collinsella  | s__Collinsella unknown_95      |
| MGYG-HGUT-00982:s__CAG-354 unknown_2           | 0.902696438 | 0.03412505     | 0.994479474 | d__Bacteria | p__Firmicutes_A   | c__Clostridia     | o__TANB77           | f__CAG-508           | g__CAG-354      | s__CAG-354 unknown_2           |
| MGYG-HGUT-00983:s__Odoribacter unknown_3       | 0.094128278 | 0.46436302169  | 0.883307256 | d__Bacteria | p__Bacteroidota   | c__Bacteroidia    | o__Bacteroidales    | f__Marinifilaceae    | g__Odoribacter  | s__Odoribacter unknown_3       |
| MGYG-HGUT-00984:s__Collinsella unknown_96      | 0.923498344 | -0.02626990184 | 0.994479474 | d__Bacteria | p__Actinobacteria | c__Coriobacteriia | o__Coriobacteriales | f__Coriobacteriaceae | g__Collinsella  | s__Collinsella unknown_96      |
| MGYG-HGUT-00986:s__Collinsella aerofaciens_F_3 | 0.072785273 | 0.489046397    | 0.877826247 | d__Bacteria | p__Actinobacteria | c__Coriobacteriia | o__Coriobacteriales | f__Coriobacteriaceae | g__Collinsella  | s__Collinsella aerofaciens_F_3 |
| MGYG-HGUT-00987:s__Dorea unknown_1             | 0.015548319 | 0.666099192    | 0.768225834 | d__Bacteria | p__Firmicutes_A   | c__Clostridia     | o__Lachnospirales   | f__Lachnospiraceae   | g__Dorea        | s__Dorea unknown_1             |
| MGYG-HGUT-00988:s__Anaerostipes unknown_2      | 0.594161465 | -0.142803321   | 0.975671757 | d__Bacteria | p__Firmicutes_A   | c__Clostridia     | o__Lachnospirales   | f__Lachnospiraceae   | g__Anaerostipes | s__Anaerostipes unknown_2      |
| MGYG-HGUT-00990:s__Blautia unknown_2           | 0.92884825  | -0.024688659   | 0.994479474 | d__Bacteria | p__Firmicutes_A   | c__Clostridia     | o__Lachnospirales   | f__Lachnospiraceae   | g__Blautia      | s__Blautia unknown_2           |

|                                                |                             |                                  |                             |                             |                                     |                               |                                         |                                          |                            |                                           |
|------------------------------------------------|-----------------------------|----------------------------------|-----------------------------|-----------------------------|-------------------------------------|-------------------------------|-----------------------------------------|------------------------------------------|----------------------------|-------------------------------------------|
| MGYG-HGUT-00996:s__Collinsella unknown_99      | 0.9<br>20<br>41<br>57<br>75 | -<br>0.0<br>27<br>38<br>74<br>86 | 0.9<br>94<br>47<br>94<br>74 | d_<br>_B<br>act<br>eri<br>a | p_<br>_A<br>ctino<br>bacte<br>riota | c_<br>_Co<br>riobac<br>teriia | o_<br>_Cor<br>iobact<br>eriales         | f_<br>_Cori<br>obacteri<br>aceae         | g_<br>_Collins<br>ella     | s_<br>_Collinsella<br>unknown_99          |
| MGYG-HGUT-00997:s__Roseburia unknown_3         | 0.9<br>42<br>36<br>72<br>67 | 0.0<br>20<br>08<br>30<br>47      | 0.9<br>94<br>47<br>94<br>74 | d_<br>_B<br>act<br>eri<br>a | p_<br>_Fi<br>rmicu<br>tes_A         | c_<br>_Clo<br>stridia         | o_<br>_Lac<br>hnospi<br>rales           | f_<br>_Lach<br>nospira<br>cae            | g_<br>_Rosebu<br>ria       | s_<br>_Roseburia<br>unknown_3             |
| MGYG-HGUT-01002:s__Collinsella aerofaciens_F_4 | 0.0<br>03<br>35<br>17<br>19 | 0.7<br>80<br>91<br>85<br>62      | 0.6<br>48<br>12<br>43<br>72 | d_<br>_B<br>act<br>eri<br>a | p_<br>_A<br>ctino<br>bacte<br>riota | c_<br>_Co<br>riobac<br>teriia | o_<br>_Cor<br>iobact<br>eriales         | f_<br>_Cori<br>obacteri<br>aceae         | g_<br>_Collins<br>ella     | s_<br>_Collinsella<br>aerofaciens_F<br>_4 |
| MGYG-HGUT-01003:s__Collinsella unknown_100     | 0.2<br>98<br>70<br>39<br>45 | 0.2<br>83<br>67<br>44<br>59      | 0.9<br>29<br>02<br>59<br>13 | d_<br>_B<br>act<br>eri<br>a | p_<br>_A<br>ctino<br>bacte<br>riota | c_<br>_Co<br>riobac<br>teriia | o_<br>_Cor<br>iobact<br>eriales         | f_<br>_Cori<br>obacteri<br>aceae         | g_<br>_Collins<br>ella     | s_<br>_Collinsella<br>unknown_100         |
| MGYG-HGUT-01004:s__CAG-56 unknown_1            | 0.2<br>51<br>12<br>05<br>71 | 0.3<br>17<br>24<br>93<br>93      | 0.9<br>02<br>18<br>13<br>67 | d_<br>_B<br>act<br>eri<br>a | p_<br>_Fi<br>rmicu<br>tes_A         | c_<br>_Clo<br>stridia         | o_<br>_Lac<br>hnospi<br>rales           | f_<br>_Lach<br>nospira<br>cae            | g_<br>_CAG-<br>56          | s_<br>_CAG-56<br>unknown_1                |
| MGYG-HGUT-01005:s__Tyzzerella unknown_2        | 0.8<br>77<br>62<br>34<br>86 | -<br>0.0<br>42<br>76<br>34<br>46 | 0.9<br>94<br>47<br>94<br>74 | d_<br>_B<br>act<br>eri<br>a | p_<br>_Fi<br>rmicu<br>tes_A         | c_<br>_Clo<br>stridia         | o_<br>_Lac<br>hnospi<br>rales           | f_<br>_Lach<br>nospira<br>cae            | g_<br>_Tyzzer<br>ella      | s_<br>_Tyzzerella<br>unknown_2            |
| MGYG-HGUT-01006:s__Pauljensenia sp000278725    | 0.7<br>22<br>82<br>14<br>79 | 0.0<br>98<br>14<br>25<br>06      | 0.9<br>79<br>45<br>84<br>75 | d_<br>_B<br>act<br>eri<br>a | p_<br>_A<br>ctino<br>bacte<br>riota | c_<br>_Ac<br>tinoba<br>cteria | o_<br>_Act<br>inomyc<br>etales          | f_<br>_Actin<br>omycet<br>aceae          | g_<br>_Pauljen<br>senia    | s_<br>_Pauljense<br>nia<br>sp000278725    |
| MGYG-HGUT-01007:s__Intestinibacter unknown     | 0.5<br>18<br>37<br>86<br>45 | -<br>0.1<br>77<br>17<br>36<br>76 | 0.9<br>68<br>53<br>20<br>73 | d_<br>_B<br>act<br>eri<br>a | p_<br>_Fi<br>rmicu<br>tes_A         | c_<br>_Clo<br>stridia         | o_<br>_Pe<br>ptostre<br>ptococ<br>cales | f_<br>_Pept<br>ostrept<br>ococcae<br>eae | g_<br>_Intesti<br>nibacter | s_<br>_Intestiniba<br>cter unknown        |
| MGYG-HGUT-01008:s__Absiella unknown_3          | 0.6<br>08<br>72<br>36<br>77 | 0.1<br>39<br>53<br>29<br>04      | 0.9<br>75<br>67<br>17<br>57 | d_<br>_B<br>act<br>eri<br>a | p_<br>_Fi<br>rmicu<br>tes           | c_<br>_Ba<br>cilli            | o_<br>_Ery<br>sipelot<br>richale<br>s   | f_<br>_Erysi<br>pelotric<br>haceae       | g_<br>_Absiell<br>a        | s_<br>_Absiella<br>unknown_3              |

|                                                   |                             |                                  |                             |                             |                                 |                           |                             |                                        |                                           |                                                     |
|---------------------------------------------------|-----------------------------|----------------------------------|-----------------------------|-----------------------------|---------------------------------|---------------------------|-----------------------------|----------------------------------------|-------------------------------------------|-----------------------------------------------------|
| MGYG-HGUT-01015:s__Gemmiger unknown_4             | 0.7<br>27<br>12<br>04<br>88 | 0.0<br>95<br>61<br>66<br>98      | 0.9<br>79<br>45<br>84<br>75 | d_<br>_B<br>act<br>eri<br>a | p__Fi<br>rmicu<br>tes_A         | c__Clo<br>stridia         | o__Os<br>cillospi<br>rales  | f__Rumi<br>nococca<br>ceae             | g__Gemmi<br>ger                           | s__Gemmiger<br>unknown_4                            |
| MGYG-HGUT-01019:s__Collinsella unknown_102        | 0.4<br>14<br>41<br>95<br>27 | 0.2<br>28<br>19<br>86<br>04      | 0.9<br>39<br>70<br>92<br>5  | d_<br>_B<br>act<br>eri<br>a | p__A<br>ctino<br>bacte<br>riota | c__Co<br>riobac<br>teriia | o__Cor<br>iobact<br>eriales | f__Cori<br>obacteri<br>aceae           | g__Collins<br>ella                        | s__Collinsella<br>unknown_10<br>2                   |
| MGYG-HGUT-01021:s__Ruminococcus_C sp000980705     | 0.9<br>06<br>46<br>32<br>88 | 0.0<br>32<br>80<br>76<br>95      | 0.9<br>94<br>47<br>94<br>74 | d_<br>_B<br>act<br>eri<br>a | p__Fi<br>rmicu<br>tes_A         | c__Clo<br>stridia         | o__Os<br>cillospi<br>rales  | f__Rumi<br>nococca<br>ceae             | g__Rumin<br>ococcus_C                     | s__Ruminoco<br>ccus_C<br>sp000980705                |
| MGYG-HGUT-01024:s__Monoglobales unknown unknown_4 | 0.0<br>03<br>07<br>80<br>02 | 0.7<br>87<br>58<br>00<br>19      | 0.6<br>48<br>12<br>43<br>72 | d_<br>_B<br>act<br>eri<br>a | p__Fi<br>rmicu<br>tes_A         | c__Clo<br>stridia         | o__Mo<br>noglob<br>ales     | f__Mon<br>oglobal<br>es<br>unknow<br>n | g__Monog<br>lobales<br>unknown<br>unknown | s__Monoglob<br>ales unknown<br>unknown<br>unknown_4 |
| MGYG-HGUT-01027:s__CAG-56 unknown_2               | 0.0<br>33<br>37<br>80<br>98 | 0.5<br>89<br>95<br>55<br>54      | 0.7<br>68<br>22<br>58<br>34 | d_<br>_B<br>act<br>eri<br>a | p__Fi<br>rmicu<br>tes_A         | c__Clo<br>stridia         | o__Lac<br>hnospi<br>rales   | f__Lach<br>nospirac<br>eae             | g__CAG-<br>56                             | s__CAG-56<br>unknown_2                              |
| MGYG-HGUT-01029:s__CAG-217 sp000436335            | 0.2<br>73<br>81<br>70<br>35 | 0.3<br>02<br>88<br>96<br>81      | 0.9<br>29<br>02<br>59<br>13 | d_<br>_B<br>act<br>eri<br>a | p__Fi<br>rmicu<br>tes_A         | c__Clo<br>stridia         | o__Os<br>cillospi<br>rales  | f__Acut<br>alibacte<br>raceae          | g__CAG-<br>217                            | s__CAG-217<br>sp000436335                           |
| MGYG-HGUT-01032:s__Eubacterium_G unknown_1        | 0.4<br>51<br>86<br>65<br>11 | 0.2<br>08<br>11<br>37<br>8       | 0.9<br>61<br>29<br>22<br>08 | d_<br>_B<br>act<br>eri<br>a | p__Fi<br>rmicu<br>tes_A         | c__Clo<br>stridia         | o__Lac<br>hnospi<br>rales   | f__Lach<br>nospirac<br>eae             | g__Eubact<br>erium_G                      | s__Eubacteriu<br>m_G<br>unknown_1                   |
| MGYG-HGUT-01036:s__CAG-1031 unknown               | 0.5<br>33<br>64<br>58<br>88 | -<br>0.1<br>73<br>89<br>71<br>87 | 0.9<br>68<br>53<br>20<br>73 | d_<br>_B<br>act<br>eri<br>a | p__B<br>acter<br>oidot<br>a     | c__Ba<br>cteroi<br>dia    | o__Bac<br>teroida<br>les    | f__Muri<br>baculac<br>eae              | g__CAG-<br>1031                           | s__CAG-1031<br>unknown                              |
| MGYG-HGUT-01038:s__Prevotellamassilia unknown_4   | 0.0<br>52<br>40<br>05<br>38 | 0.5<br>38<br>19<br>26<br>1       | 0.8<br>57<br>21<br>13<br>2  | d_<br>_B<br>act<br>eri<br>a | p__B<br>acter<br>oidot<br>a     | c__Ba<br>cteroi<br>dia    | o__Bac<br>teroida<br>les    | f__Bact<br>eroidac<br>eae              | g__Prevot<br>ellamassili<br>a             | s__Prevotella<br>massilia<br>unknown_4              |

|                                                  |             |              |             |                  |                 |                |                    |                     |                      |                                  |
|--------------------------------------------------|-------------|--------------|-------------|------------------|-----------------|----------------|--------------------|---------------------|----------------------|----------------------------------|
| MGYG-HGUT-01039:s__Bacteroides_A unknown_3       | 0.907244717 | -0.032506615 | 0.994479474 | d__Bacteroidetes | p__Bacteroidota | c__Bacteroidia | o__Bacteroidales   | f__Bacteroidaceae   | g__Bacteroides_A     | s__Bacteroides_A unknown_3       |
| MGYG-HGUT-01040:s__Prevotella unknown_13         | 0.2027299   | 0.346676002  | 0.891825559 | d__Bacteroidetes | p__Bacteroidota | c__Bacteroidia | o__Bacteroidales   | f__Bacteroidaceae   | g__Prevotella        | s__Prevotella unknown_13         |
| MGYG-HGUT-01042:s__Prevotella sp000436595        | 0.321170804 | -0.276621085 | 0.929425266 | d__Bacteroidetes | p__Bacteroidota | c__Bacteroidia | o__Bacteroidales   | f__Bacteroidaceae   | g__Prevotella        | s__Prevotella sp000436595        |
| MGYG-HGUT-01045:s__Clostridium_M unknown_4       | 0.176550041 | -0.35812513  | 0.891825559 | d__Bacteroidetes | p__Firmicutes_A | c__Clostridia  | o__Lachnospirales  | f__Lachnospiraceae  | g__Clostridium_M     | s__Clostridium_M unknown_4       |
| MGYG-HGUT-01046:s__CAG-103 unknown_1             | 0.703974925 | 0.100913531  | 0.979458475 | d__Bacteroidetes | p__Firmicutes_A | c__Clostridia  | o__Oscillospirales | f__Oscillospiraceae | g__CAG-103           | s__CAG-103 unknown_1             |
| MGYG-HGUT-01051:s__Prevotella unknown_14         | 0.456322271 | -0.204442331 | 0.965574692 | d__Bacteroidetes | p__Bacteroidota | c__Bacteroidia | o__Bacteroidales   | f__Bacteroidaceae   | g__Prevotella        | s__Prevotella unknown_14         |
| MGYG-HGUT-01052:s__Blautia unknown_3             | 0.600776317 | 0.146197989  | 0.975671757 | d__Bacteroidetes | p__Firmicutes_A | c__Clostridia  | o__Lachnospirales  | f__Lachnospiraceae  | g__Blautia           | s__Blautia unknown_3             |
| MGYG-HGUT-01056:s__Prevotella unknown_15         | 0.604954259 | -0.142679736 | 0.975671757 | d__Bacteroidetes | p__Bacteroidota | c__Bacteroidia | o__Bacteroidales   | f__Bacteroidaceae   | g__Prevotella        | s__Prevotella unknown_15         |
| MGYG-HGUT-01057:s__Negativibacterium sp000435195 | 0.77842     | 0.07699      | 0.97952     | d__Bacteroidetes | p__Firmicutes_A | c__Clostridia  | o__Oscillospirales | f__Ruminococcaceae  | g__Negativibacterium | s__Negativibacterium sp000435195 |

|                                                     |                             |                                  |                             |                             |                                 |                           |                             |                               |                      |                                     |
|-----------------------------------------------------|-----------------------------|----------------------------------|-----------------------------|-----------------------------|---------------------------------|---------------------------|-----------------------------|-------------------------------|----------------------|-------------------------------------|
| bacillus<br>sp000435195                             | 98<br>34                    | 69<br>75                         | 04<br>84                    | eri<br>a                    |                                 |                           |                             |                               |                      |                                     |
| MGYG-HGUT-<br>01060:s__Dialister<br>sp900343095     | 0.2<br>18<br>01<br>88<br>52 | -<br>0.3<br>36<br>30<br>57<br>09 | 0.8<br>91<br>82<br>55<br>59 | d_<br>_B<br>act<br>eri<br>a | p__Fi<br>rmicu<br>tes_C         | c__Ne<br>gativic<br>utes  | o__Vei<br>llonella<br>les   | f__Diali<br>steracea<br>e     | g__Dialiste<br>r     | s__Dialister<br>sp900343095         |
| MGYG-HGUT-<br>01061:s__Collinsella<br>unknown_105   | 0.1<br>86<br>59<br>76<br>23 | 0.3<br>67<br>09<br>28<br>18      | 0.8<br>91<br>82<br>55<br>59 | d_<br>_B<br>act<br>eri<br>a | p__A<br>ctino<br>bacte<br>riota | c__Co<br>riobac<br>teriia | o__Cor<br>iobact<br>eriales | f__Cori<br>obacteri<br>aceae  | g__Collins<br>ella   | s__Collinsella<br>unknown_10<br>5   |
| MGYG-HGUT-<br>01064:s__Streptococcus<br>unknown_6   | 0.2<br>47<br>08<br>56<br>41 | 0.3<br>19<br>16<br>61<br>95      | 0.9<br>02<br>18<br>13<br>67 | d_<br>_B<br>act<br>eri<br>a | p__Fi<br>rmicu<br>tes           | c__Ba<br>cilli            | o__Lac<br>tobacill<br>ales  | f__Stre<br>ptococc<br>aceae   | g__Strepto<br>coccus | s__Streptococ<br>cus<br>unknown_6   |
| MGYG-HGUT-<br>01065:s__Clostridium_M<br>unknown_5   | 0.9<br>69<br>99<br>31<br>3  | -<br>0.0<br>10<br>56<br>26       | 0.9<br>94<br>47<br>94<br>74 | d_<br>_B<br>act<br>eri<br>a | p__Fi<br>rmicu<br>tes_A         | c__Clo<br>stridia         | o__Lac<br>hnospi<br>rales   | f__Lach<br>nospirac<br>eae    | g__Clostri<br>dium_M | s__Clostridiu<br>m_M<br>unknown_5   |
| MGYG-HGUT-<br>01066:s__F0422<br>sp001553345         | 0.8<br>84<br>35<br>88<br>03 | 0.0<br>40<br>84<br>69<br>18      | 0.9<br>94<br>47<br>94<br>74 | d_<br>_B<br>act<br>eri<br>a | p__Fi<br>rmicu<br>tes_C         | c__Ne<br>gativic<br>utes  | o__Vei<br>llonella<br>les   | f__Veill<br>onellace<br>ae    | g__F0422             | s__F0422<br>sp001553345             |
| MGYG-HGUT-<br>01068:s__Streptococcus<br>sp000187445 | 0.5<br>50<br>69<br>55<br>42 | 0.1<br>65<br>05<br>73<br>9       | 0.9<br>68<br>53<br>20<br>73 | d_<br>_B<br>act<br>eri<br>a | p__Fi<br>rmicu<br>tes           | c__Ba<br>cilli            | o__Lac<br>tobacill<br>ales  | f__Stre<br>ptococc<br>aceae   | g__Strepto<br>coccus | s__Streptococ<br>cus<br>sp000187445 |
| MGYG-HGUT-<br>01069:s__UBA4871<br>unknown_1         | 0.9<br>27<br>97<br>97<br>01 | -<br>0.0<br>24<br>91<br>57<br>46 | 0.9<br>94<br>47<br>94<br>74 | d_<br>_B<br>act<br>eri<br>a | p__Fi<br>rmicu<br>tes_A         | c__Clo<br>stridia         | o__Os<br>cillospi<br>rales  | f__Acut<br>alibacte<br>raceae | g__UBA48<br>71       | s__UBA4871<br>unknown_1             |
| MGYG-HGUT-<br>01072:s__Dorea<br>unknown_2           | 0.4<br>90<br>99<br>26<br>7  | -<br>0.1<br>92<br>22<br>56<br>35 | 0.9<br>68<br>53<br>20<br>73 | d_<br>_B<br>act<br>eri<br>a | p__Fi<br>rmicu<br>tes_A         | c__Clo<br>stridia         | o__Lac<br>hnospi<br>rales   | f__Lach<br>nospirac<br>eae    | g__Dorea             | s__Dorea<br>unknown_2               |
| MGYG-HGUT-<br>01074:s__Prevotella<br>sp002251365    | 0.9<br>10<br>65             | -<br>0.0<br>31                   | 0.9<br>94<br>47             | d_<br>_B<br>act             | p__B<br>acter                   | c__Ba<br>cteroi<br>dia    | o__Bac<br>teroida<br>les    | f__Bact<br>eroidac<br>eae     | g__Prevot<br>ella    | s__Prevotella<br>sp002251365        |

|                                             |                             |                                  |                             |                             |                                     |                               |                                 |                                   |                           |                                        |
|---------------------------------------------|-----------------------------|----------------------------------|-----------------------------|-----------------------------|-------------------------------------|-------------------------------|---------------------------------|-----------------------------------|---------------------------|----------------------------------------|
|                                             | 78<br>15                    | 54<br>34<br>01                   | 94<br>74                    | eri<br>a                    | oidot<br>a                          |                               |                                 |                                   |                           |                                        |
| MGYG-HGUT-01076:s__CAG-411 sp000437275      | 0.0<br>99<br>66<br>57<br>41 | 0.4<br>48<br>61<br>82<br>22      | 0.8<br>83<br>30<br>72<br>56 | d_<br>_B<br>act<br>eri<br>a | p_<br>_Fi<br>rmicu<br>tes_A         | c_<br>_Clo<br>stridia         | o_<br>_Lac<br>hnospi<br>rales   | f_<br>_Lach<br>nospirac<br>eae    | g_<br>_CAG-<br>411        | s_<br>_CAG-411<br>sp000437275          |
| MGYG-HGUT-01081:s__Acutalibacter unknown_1  | 0.3<br>21<br>42<br>40<br>71 | -<br>0.2<br>52<br>00<br>56<br>42 | 0.9<br>29<br>42<br>52<br>66 | d_<br>_B<br>act<br>eri<br>a | p_<br>_Fi<br>rmicu<br>tes_A         | c_<br>_Clo<br>stridia         | o_<br>_Os<br>cillospi<br>rales  | f_<br>_Acut<br>alibacte<br>raceae | g_<br>_Acutali<br>bacter  | s_<br>_Acutalibac<br>ter<br>unknown_1  |
| MGYG-HGUT-01082:s__Ruminococcus_E unknown_1 | 0.1<br>74<br>45<br>33<br>07 | 0.3<br>61<br>23<br>71<br>23      | 0.8<br>91<br>82<br>55<br>59 | d_<br>_B<br>act<br>eri<br>a | p_<br>_Fi<br>rmicu<br>tes_A         | c_<br>_Clo<br>stridia         | o_<br>_Os<br>cillospi<br>rales  | f_<br>_Acut<br>alibacte<br>raceae | g_<br>_Rumin<br>ococcus_E | s_<br>_Ruminoco<br>ccus_E<br>unknown_1 |
| MGYG-HGUT-01084:s__Collinsella unknown_106  | 0.5<br>72<br>52<br>96<br>15 | 0.1<br>55<br>71<br>20<br>74      | 0.9<br>75<br>31<br>97<br>55 | d_<br>_B<br>act<br>eri<br>a | p_<br>_A<br>ctino<br>bacte<br>riota | c_<br>_Co<br>riobac<br>teriia | o_<br>_Cor<br>iobact<br>eriales | f_<br>_Cori<br>obacteri<br>aceae  | g_<br>_Collins<br>ella    | s_<br>_Collinsella<br>unknown_10<br>6  |
| MGYG-HGUT-01085:s__RC9 sp000434935          | 0.9<br>55<br>44<br>28<br>23 | 0.0<br>14<br>99<br>80<br>2       | 0.9<br>94<br>47<br>94<br>74 | d_<br>_B<br>act<br>eri<br>a | p_<br>_B<br>acter<br>oidot<br>a     | c_<br>_Ba<br>cteroi<br>dia    | o_<br>_Bac<br>teroida<br>les    | f_<br>_UBA<br>932                 | g_<br>_RC9                | s_<br>_RC9<br>sp000434935              |
| MGYG-HGUT-01086:s__Collinsella unknown_107  | 0.1<br>56<br>57<br>79<br>89 | 0.3<br>88<br>97<br>11<br>18      | 0.8<br>91<br>82<br>55<br>59 | d_<br>_B<br>act<br>eri<br>a | p_<br>_A<br>ctino<br>bacte<br>riota | c_<br>_Co<br>riobac<br>teriia | o_<br>_Cor<br>iobact<br>eriales | f_<br>_Cori<br>obacteri<br>aceae  | g_<br>_Collins<br>ella    | s_<br>_Collinsella<br>unknown_10<br>7  |
| MGYG-HGUT-01087:s__Anaerostipes unknown_3   | 0.2<br>56<br>46<br>20<br>19 | -<br>0.3<br>17<br>56<br>04<br>41 | 0.9<br>05<br>66<br>66<br>14 | d_<br>_B<br>act<br>eri<br>a | p_<br>_Fi<br>rmicu<br>tes_A         | c_<br>_Clo<br>stridia         | o_<br>_Lac<br>hnospi<br>rales   | f_<br>_Lach<br>nospirac<br>eae    | g_<br>_Anaero<br>stipes   | s_<br>_Anaerosti<br>pes<br>unknown_3   |
| MGYG-HGUT-01089:s__Clostridium sp000435835  | 0.1<br>08<br>21<br>13<br>79 | -<br>0.4<br>39<br>56<br>88<br>18 | 0.8<br>83<br>30<br>72<br>56 | d_<br>_B<br>act<br>eri<br>a | p_<br>_Fi<br>rmicu<br>tes_A         | c_<br>_Clo<br>stridia         | o_<br>_Clo<br>stridial<br>es    | f_<br>_Clost<br>ridiacea<br>e     | g_<br>_Clostri<br>dium    | s_<br>_Clostridiu<br>m<br>sp000435835  |



|                                                       |                             |                                  |                             |                             |                                 |                           |                                   |                               |                                    |                                                 |
|-------------------------------------------------------|-----------------------------|----------------------------------|-----------------------------|-----------------------------|---------------------------------|---------------------------|-----------------------------------|-------------------------------|------------------------------------|-------------------------------------------------|
| MGYG-HGUT-01092:s__Collinsella unknown_108            | 0.1<br>12<br>48<br>93<br>89 | 0.4<br>21<br>28<br>77<br>14      | 0.8<br>83<br>30<br>72<br>56 | d_<br>_B<br>act<br>eri<br>a | p__A<br>ctino<br>bacte<br>riota | c__Co<br>riobac<br>teriia | o__Cor<br>iobact<br>eriales       | f__Cori<br>obacteri<br>aceae  | g__Collins<br>ella                 | s__Collinsella<br>unknown_10<br>8               |
| MGYG-HGUT-01097:s__Prevotella sp000834015             | 0.2<br>62<br>63<br>89<br>48 | -<br>0.3<br>11<br>51<br>11<br>07 | 0.9<br>13<br>13<br>14<br>21 | d_<br>_B<br>act<br>eri<br>a | p__B<br>acter<br>oidot<br>a     | c__Ba<br>cteroi<br>dia    | o__Bac<br>teroida<br>les          | f__Bact<br>eroidac<br>eae     | g__Prevot<br>ella                  | s__Prevotella<br>sp000834015                    |
| MGYG-HGUT-01098:s__Eubacterium_R sp002493325          | 0.1<br>18<br>54<br>32<br>56 | 0.4<br>28<br>74<br>99<br>2       | 0.8<br>83<br>30<br>72<br>56 | d_<br>_B<br>act<br>eri<br>a | p__Fi<br>rmicu<br>tes_A         | c__Clo<br>stridia         | o__Os<br>cillospi<br>rales        | f__Acut<br>alibacte<br>raceae | g__Eubact<br>erium_R               | s__Eubacteriu<br>m_R<br>sp002493325             |
| MGYG-HGUT-01099:s__Collinsella unknown_109            | 0.2<br>86<br>54<br>95<br>15 | 0.2<br>95<br>37<br>79<br>97      | 0.9<br>29<br>02<br>59<br>13 | d_<br>_B<br>act<br>eri<br>a | p__A<br>ctino<br>bacte<br>riota | c__Co<br>riobac<br>teriia | o__Cor<br>iobact<br>eriales       | f__Cori<br>obacteri<br>aceae  | g__Collins<br>ella                 | s__Collinsella<br>unknown_10<br>9               |
| MGYG-HGUT-01100:s__Weissella viridescens              | 0.9<br>45<br>10<br>10<br>32 | -<br>0.0<br>19<br>25<br>10<br>26 | 0.9<br>94<br>47<br>94<br>74 | d_<br>_B<br>act<br>eri<br>a | p__Fi<br>rmicu<br>tes           | c__Ba<br>cilli            | o__Lac<br>tobacill<br>ales        | f__Lact<br>obacilla<br>ceae   | g__Weisse<br>lla                   | s__Weissella<br>viridescens                     |
| MGYG-HGUT-01103:s__CAG-74 unknown unknown_3           | 0.3<br>02<br>38<br>92<br>84 | 0.2<br>71<br>05<br>14<br>59      | 0.9<br>29<br>02<br>59<br>13 | d_<br>_B<br>act<br>eri<br>a | p__Fi<br>rmicu<br>tes_A         | c__Clo<br>stridia         | o__Chr<br>istense<br>nellale<br>s | f__CAG-<br>74                 | g__CAG-<br>74<br>unknown           | s__CAG-74<br>unknown<br>unknown_3               |
| MGYG-HGUT-01104:s__Oscillospiraceae unknown unknown_3 | 0.9<br>88<br>23<br>99<br>98 | 0.0<br>04<br>07<br>09<br>62      | 0.9<br>98<br>80<br>33<br>46 | d_<br>_B<br>act<br>eri<br>a | p__Fi<br>rmicu<br>tes_A         | c__Clo<br>stridia         | o__Os<br>cillospi<br>rales        | f__Oscil<br>lospirac<br>eae   | g__Oscillo<br>spiraceae<br>unknown | s__Oscillospir<br>aceae<br>unknown<br>unknown_3 |
| MGYG-HGUT-01106:s__Pygmaio bacter unknown             | 0.9<br>96<br>56<br>76<br>36 | 0.0<br>01<br>20<br>23<br>96      | 0.9<br>98<br>80<br>33<br>46 | d_<br>_B<br>act<br>eri<br>a | p__Fi<br>rmicu<br>tes_A         | c__Clo<br>stridia         | o__Os<br>cillospi<br>rales        | f__Rumi<br>nococca<br>ceae    | g__Pygmai<br>obacter               | s__Pygmaiob<br>acter<br>unknown                 |
| MGYG-HGUT-01108:s__Collinsella unknown_112            | 0.2<br>47<br>37<br>93<br>19 | 0.3<br>16<br>36<br>94<br>24      | 0.9<br>02<br>18<br>13<br>67 | d_<br>_B<br>act<br>eri<br>a | p__A<br>ctino<br>bacte<br>riota | c__Co<br>riobac<br>teriia | o__Cor<br>iobact<br>eriales       | f__Cori<br>obacteri<br>aceae  | g__Collins<br>ella                 | s__Collinsella<br>unknown_11<br>2               |

|                                                    |                             |                                  |                             |                             |                                 |                           |                             |                              |                                   |                                              |
|----------------------------------------------------|-----------------------------|----------------------------------|-----------------------------|-----------------------------|---------------------------------|---------------------------|-----------------------------|------------------------------|-----------------------------------|----------------------------------------------|
| MGYG-HGUT-01109:s__CAG-110 unknown_6               | 0.0<br>17<br>80<br>26<br>64 | 0.6<br>50<br>82<br>54<br>78      | 0.7<br>68<br>22<br>58<br>34 | d_<br>_B<br>act<br>eri<br>a | p__Fi<br>rmicu<br>tes_A         | c__Clo<br>stridia         | o__Os<br>cillospi<br>rales  | f__Oscil<br>lospirac<br>eae  | g__CAG-<br>110                    | s__CAG-110<br>unknown_6                      |
| MGYG-HGUT-01110:s__CAG-269 sp000431335             | 0.1<br>48<br>05<br>29<br>84 | -<br>0.3<br>96<br>44<br>40<br>52 | 0.8<br>91<br>82<br>55<br>59 | d_<br>_B<br>act<br>eri<br>a | p__Fi<br>rmicu<br>tes_A         | c__Clo<br>stridia         | o__TA<br>NB77               | f__CAG-<br>508               | g__CAG-<br>269                    | s__CAG-269<br>sp000431335                    |
| MGYG-HGUT-01111:s__Roseburia unknown_4             | 0.2<br>12<br>18<br>79<br>69 | 0.3<br>33<br>16<br>10<br>34      | 0.8<br>91<br>82<br>55<br>59 | d_<br>_B<br>act<br>eri<br>a | p__Fi<br>rmicu<br>tes_A         | c__Clo<br>stridia         | o__Lac<br>hnospi<br>rales   | f__Lach<br>nospirac<br>eae   | g__Rosebu<br>ria                  | s__Roseburia<br>unknown_4                    |
| MGYG-HGUT-01114:s__Collinsella unknown_113         | 0.6<br>85<br>17<br>32<br>26 | 0.1<br>12<br>58<br>56<br>15      | 0.9<br>75<br>76<br>85<br>79 | d_<br>_B<br>act<br>eri<br>a | p__A<br>ctino<br>bacte<br>riota | c__Co<br>riobac<br>teriia | o__Cor<br>iobact<br>eriales | f__Cori<br>obacteri<br>aceae | g__Collins<br>ella                | s__Collinsella<br>unknown_11<br>3            |
| MGYG-HGUT-01115:s__Agathobaculum unknown_2         | 0.1<br>45<br>92<br>19<br>12 | 0.3<br>97<br>93<br>71<br>09      | 0.8<br>91<br>82<br>55<br>59 | d_<br>_B<br>act<br>eri<br>a | p__Fi<br>rmicu<br>tes_A         | c__Clo<br>stridia         | o__Os<br>cillospi<br>rales  | f__Buty<br>ricicocc<br>aceae | g__Agatho<br>baculum              | s__Agathobac<br>ulum<br>unknown_2            |
| MGYG-HGUT-01118:s__Anaerotignaceae unknown unknown | 0.8<br>50<br>42<br>11<br>59 | 0.0<br>52<br>63<br>36<br>76      | 0.9<br>92<br>87<br>80<br>88 | d_<br>_B<br>act<br>eri<br>a | p__Fi<br>rmicu<br>tes_A         | c__Clo<br>stridia         | o__Lac<br>hnospi<br>rales   | f__Anae<br>rotignac<br>eae   | g__Anaero<br>tignaceae<br>unknown | s__Anaerotig<br>naceae<br>unknown<br>unknown |
| MGYG-HGUT-01120:s__Butyricoccus_A sp002395695      | 0.3<br>24<br>71<br>35<br>97 | 0.2<br>68<br>79<br>76<br>38      | 0.9<br>30<br>62<br>46<br>92 | d_<br>_B<br>act<br>eri<br>a | p__Fi<br>rmicu<br>tes_A         | c__Clo<br>stridia         | o__Os<br>cillospi<br>rales  | f__Buty<br>ricicocc<br>aceae | g__Butyric<br>icoccus_A           | s__Butyricico<br>ccus_A<br>sp002395695       |
| MGYG-HGUT-01126:s__Collinsella unknown_118         | 0.1<br>17<br>07<br>47<br>86 | 0.4<br>34<br>10<br>97<br>58      | 0.8<br>83<br>30<br>72<br>56 | d_<br>_B<br>act<br>eri<br>a | p__A<br>ctino<br>bacte<br>riota | c__Co<br>riobac<br>teriia | o__Cor<br>iobact<br>eriales | f__Cori<br>obacteri<br>aceae | g__Collins<br>ella                | s__Collinsella<br>unknown_11<br>8            |
| MGYG-HGUT-01129:s__Ruminococcus_C sp000437255      | 0.8<br>62<br>90<br>74<br>72 | -<br>0.0<br>48<br>29<br>38<br>64 | 0.9<br>94<br>47<br>94<br>74 | d_<br>_B<br>act<br>eri<br>a | p__Fi<br>rmicu<br>tes_A         | c__Clo<br>stridia         | o__Os<br>cillospi<br>rales  | f__Rumi<br>nococca<br>ceae   | g__Rumin<br>ococcus_C             | s__Ruminoco<br>ccus_C<br>sp000437255         |

|                                               |                             |                                  |                             |                             |                                 |                           |                                   |                              |                           |                                      |
|-----------------------------------------------|-----------------------------|----------------------------------|-----------------------------|-----------------------------|---------------------------------|---------------------------|-----------------------------------|------------------------------|---------------------------|--------------------------------------|
| MGYG-HGUT-01131:s__Prevotella unknown_16      | 0.6<br>60<br>18<br>92<br>23 | 0.1<br>21<br>42<br>39<br>94      | 0.9<br>75<br>67<br>17<br>57 | d_<br>_B<br>act<br>eri<br>a | p__B<br>acter<br>oidot<br>a     | c__Ba<br>cteroi<br>dia    | o__Bac<br>teroida<br>les          | f__Bact<br>eroidac<br>eae    | g__Prevot<br>ella         | s__Prevotella<br>unknown_16          |
| MGYG-HGUT-01132:s__UBA1685 sp002320595        | 0.6<br>41<br>89<br>61<br>19 | 0.1<br>29<br>27<br>86<br>61      | 0.9<br>75<br>67<br>17<br>57 | d_<br>_B<br>act<br>eri<br>a | p__Fi<br>rmicu<br>tes_A         | c__Clo<br>stridia         | o__Chr<br>istense<br>nellale<br>s | f__CAG-<br>138               | g__UBA16<br>85            | s__UBA1685<br>sp002320595            |
| MGYG-HGUT-01133:s__CAG-272 unknown unknown_8  | 0.9<br>79<br>20<br>29       | 0.0<br>07<br>32<br>88<br>01      | 0.9<br>97<br>64<br>79<br>14 | d_<br>_B<br>act<br>eri<br>a | p__Fi<br>rmicu<br>tes_A         | c__Clo<br>stridia         | o__Os<br>cillospi<br>rales        | f__CAG-<br>272               | g__CAG-<br>272<br>unknown | s__CAG-272<br>unknown<br>unknown_8   |
| MGYG-HGUT-01135:s__Collinsella unknown_122    | 0.3<br>78<br>69<br>75<br>5  | 0.2<br>42<br>89<br>98<br>73      | 0.9<br>39<br>70<br>92<br>5  | d_<br>_B<br>act<br>eri<br>a | p__A<br>ctino<br>bacte<br>riota | c__Co<br>riobac<br>teriia | o__Cor<br>iobact<br>eriales       | f__Cori<br>obacteri<br>aceae | g__Collins<br>ella        | s__Collinsella<br>unknown_12<br>2    |
| MGYG-HGUT-01136:s__CAG-103 unknown_2          | 0.8<br>55<br>98<br>78<br>18 | -<br>0.0<br>50<br>48<br>78<br>55 | 0.9<br>92<br>87<br>80<br>88 | d_<br>_B<br>act<br>eri<br>a | p__Fi<br>rmicu<br>tes_A         | c__Clo<br>stridia         | o__Os<br>cillospi<br>rales        | f__Oscil<br>lospirac<br>eae  | g__CAG-<br>103            | s__CAG-103<br>unknown_2              |
| MGYG-HGUT-01138:s__Collinsella sp002232035_20 | 0.0<br>77<br>54<br>69<br>79 | 0.4<br>85<br>33<br>40<br>89      | 0.8<br>77<br>82<br>62<br>47 | d_<br>_B<br>act<br>eri<br>a | p__A<br>ctino<br>bacte<br>riota | c__Co<br>riobac<br>teriia | o__Cor<br>iobact<br>eriales       | f__Cori<br>obacteri<br>aceae | g__Collins<br>ella        | s__Collinsella<br>sp002232035<br>_20 |
| MGYG-HGUT-01139:s__Collinsella unknown_124    | 0.2<br>85<br>90<br>97<br>29 | 0.2<br>93<br>42<br>67<br>01      | 0.9<br>29<br>02<br>59<br>13 | d_<br>_B<br>act<br>eri<br>a | p__A<br>ctino<br>bacte<br>riota | c__Co<br>riobac<br>teriia | o__Cor<br>iobact<br>eriales       | f__Cori<br>obacteri<br>aceae | g__Collins<br>ella        | s__Collinsella<br>unknown_12<br>4    |
| MGYG-HGUT-01140:s__Collinsella unknown_125    | 0.1<br>30<br>62<br>52<br>66 | 0.4<br>15<br>48<br>24<br>39      | 0.8<br>91<br>82<br>55<br>59 | d_<br>_B<br>act<br>eri<br>a | p__A<br>ctino<br>bacte<br>riota | c__Co<br>riobac<br>teriia | o__Cor<br>iobact<br>eriales       | f__Cori<br>obacteri<br>aceae | g__Collins<br>ella        | s__Collinsella<br>unknown_12<br>5    |
| MGYG-HGUT-01141:s__CAG-303 sp000437755        | 0.2<br>63<br>15<br>76<br>28 | 0.3<br>05<br>63<br>72<br>9       | 0.9<br>13<br>13<br>14<br>21 | d_<br>_B<br>act<br>eri<br>a | p__Fi<br>rmicu<br>tes_A         | c__Clo<br>stridia         | o__Lac<br>hnospi<br>rales         | f__Lach<br>nospi<br>rales    | g__CAG-<br>303            | s__CAG-303<br>sp000437755            |

|                                               |             |              |             |             |                   |                   |                     |                       |                            |                               |
|-----------------------------------------------|-------------|--------------|-------------|-------------|-------------------|-------------------|---------------------|-----------------------|----------------------------|-------------------------------|
| MGYG-HGUT-01142:s__Collinsella unknown_126    | 0.889018169 | 0.039065748  | 0.9479474   | d__Bacteria | p__Actinobacteria | c__Coriobacteriia | o__Coriobacteriales | f__Coriobacteriaceae  | g__Collinsella             | s__Collinsella unknown_126    |
| MGYG-HGUT-01150:s__Collinsella unknown_127    | 0.0640963   | 0.509253808  | 0.85721132  | d__Bacteria | p__Actinobacteria | c__Coriobacteriia | o__Coriobacteriales | f__Coriobacteriaceae  | g__Collinsella             | s__Collinsella unknown_127    |
| MGYG-HGUT-01151:s__Ruminococcus_C sp000433635 | 0.855631513 | -0.048928075 | 0.992878088 | d__Bacteria | p__Firmicutes_A   | c__Clostridia     | o__Oscillospirales  | f__Ruminococcaeae     | g__Ruminococcus_C          | s__Ruminococcus_C sp000433635 |
| MGYG-HGUT-01152:s__Collinsella sp002232035_21 | 0.389949643 | 0.236589155  | 0.93970925  | d__Bacteria | p__Actinobacteria | c__Coriobacteriia | o__Coriobacteriales | f__Coriobacteriaceae  | g__Collinsella             | s__Collinsella sp002232035_21 |
| MGYG-HGUT-01153:s__Eggerthellaceae unknown_6  | 0.8586864   | -0.0486644   | 0.992878088 | d__Bacteria | p__Actinobacteria | c__Coriobacteriia | o__Coriobacteriales | f__Eggerthellaceae    | g__Eggerthellaceae unknown | s__Eggerthellaceae unknown_6  |
| MGYG-HGUT-01155:s__UBA738 unknown_3           | 0.162503541 | 0.376543413  | 0.891825559 | d__Bacteria | p__Firmicutes_A   | c__Clostridia     | o__Oscillospirales  | f__Oscillospiraceae   | g__UBA738                  | s__UBA738 unknown_3           |
| MGYG-HGUT-01157:s__Gemmiger unknown_5         | 0.240302196 | 0.319301813  | 0.902181367 | d__Bacteria | p__Firmicutes_A   | c__Clostridia     | o__Oscillospirales  | f__Ruminococcaeae     | g__Gemmiger                | s__Gemmiger unknown_5         |
| MGYG-HGUT-01158:s__Collinsella unknown_128    | 0.678647602 | -0.116140841 | 0.975671757 | d__Bacteria | p__Actinobacteria | c__Coriobacteriia | o__Coriobacteriales | f__Coriobacteriaceae  | g__Collinsella             | s__Collinsella unknown_128    |
| MGYG-HGUT-01159:s__Bifidobacterium pullorum   | 0.722051272 | -0.0986675   | 0.979458475 | d__Bacteria | p__Actinobacteria | c__Actinobacteria | o__Actinomycetales  | f__Bifidobacteriaceae | g__Bifidobacterium         | s__Bifidobacterium pullorum   |

|                                              |                                   |                                  |                             |                             |                                 |                           |                             |                               |                                  |                                               |
|----------------------------------------------|-----------------------------------|----------------------------------|-----------------------------|-----------------------------|---------------------------------|---------------------------|-----------------------------|-------------------------------|----------------------------------|-----------------------------------------------|
|                                              |                                   | 03<br>32                         |                             |                             |                                 |                           |                             |                               |                                  |                                               |
| MGYG-HGUT-01160:s__CAG-274 sp000432155       | 0.3<br>55<br>91<br>97<br>52<br>77 | -<br>0.2<br>54<br>67<br>40<br>77 | 0.9<br>39<br>70<br>92<br>5  | d_<br>_B<br>act<br>eri<br>a | p__Fi<br>rmicu<br>tes_A         | c__Clo<br>stridia         | o__Lac<br>hnospi<br>rales   | f__CAG-<br>274                | g__CAG-<br>274                   | s__CAG-274<br>sp000432155                     |
| MGYG-HGUT-01161:s__Collinsella unknown_129   | 0.6<br>07<br>13<br>18<br>79       | -<br>0.1<br>43<br>96<br>73<br>82 | 0.9<br>75<br>67<br>17<br>57 | d_<br>_B<br>act<br>eri<br>a | p__A<br>ctino<br>bacte<br>riota | c__Co<br>riobac<br>teriia | o__Cor<br>iobact<br>eriales | f__Cori<br>obacteri<br>aceae  | g__Collins<br>ella               | s__Collinsella<br>unknown_129                 |
| MGYG-HGUT-01164:s__Prevotella lascolaii      | 0.7<br>74<br>24<br>96<br>11       | -<br>0.0<br>77<br>49<br>58<br>6  | 0.9<br>79<br>52<br>04<br>84 | d_<br>_B<br>act<br>eri<br>a | p__B<br>acter<br>oidot<br>a     | c__Ba<br>cteroi<br>dia    | o__Bac<br>teroida<br>les    | f__Bact<br>eroidac<br>eae     | g__Prevot<br>ella                | s__Prevotella<br>lascolaii                    |
| MGYG-HGUT-01165:s__Collinsella sp000763055_1 | 0.4<br>50<br>98<br>63<br>57       | 0.2<br>03<br>28<br>65<br>09      | 0.9<br>61<br>29<br>22<br>08 | d_<br>_B<br>act<br>eri<br>a | p__A<br>ctino<br>bacte<br>riota | c__Co<br>riobac<br>teriia | o__Cor<br>iobact<br>eriales | f__Cori<br>obacteri<br>aceae  | g__Collins<br>ella               | s__Collinsella<br>sp000763055<br>_1           |
| MGYG-HGUT-01166:s__F23-B02 unknown_3         | 0.8<br>79<br>06<br>88<br>46       | -<br>0.0<br>40<br>94<br>80<br>06 | 0.9<br>94<br>47<br>94<br>74 | d_<br>_B<br>act<br>eri<br>a | p__Fi<br>rmicu<br>tes_A         | c__Clo<br>stridia         | o__Os<br>cillospi<br>rales  | f__Oscil<br>lospirac<br>eae   | g__F23-<br>B02                   | s__F23-B02<br>unknown_3                       |
| MGYG-HGUT-01168:s__CAG-1427 sp000436075      | 0.8<br>13<br>39<br>99<br>5        | 0.0<br>66<br>17<br>20<br>68      | 0.9<br>87<br>14<br>23<br>02 | d_<br>_B<br>act<br>eri<br>a | p__A<br>ctino<br>bacte<br>riota | c__Co<br>riobac<br>teriia | o__Cor<br>iobact<br>eriales | f__Egge<br>rthellac<br>eae    | g__CAG-<br>1427                  | s__CAG-1427<br>sp000436075                    |
| MGYG-HGUT-01169:s__Acutalibacter unknown_2   | 0.7<br>90<br>93<br>08<br>79       | 0.0<br>70<br>85<br>78<br>96      | 0.9<br>82<br>96<br>63       | d_<br>_B<br>act<br>eri<br>a | p__Fi<br>rmicu<br>tes_A         | c__Clo<br>stridia         | o__Os<br>cillospi<br>rales  | f__Acut<br>alibacte<br>raceae | g__Acutali<br>bacter             | s__Acutalibac<br>ter<br>unknown_2             |
| MGYG-HGUT-01171:s__Peptococcaceae unknown_3  | 0.1<br>84<br>52<br>72<br>82       | -<br>0.3<br>67<br>69<br>71<br>42 | 0.8<br>91<br>82<br>55<br>59 | d_<br>_B<br>act<br>eri<br>a | p__Fi<br>rmicu<br>tes_B         | c__Pe<br>ptococ<br>cia    | o__Pe<br>ptococ<br>cales    | f__Pept<br>ococcac<br>eae     | g__Peptoc<br>occaceae<br>unknown | s__Peptococc<br>aceae<br>unknown<br>unknown_3 |

|                                                       |             |              |             |             |                   |                   |                         |                        |                             |                                       |
|-------------------------------------------------------|-------------|--------------|-------------|-------------|-------------------|-------------------|-------------------------|------------------------|-----------------------------|---------------------------------------|
| MGYG-HGUT-01173:s__Collinsella unknown_130            | 0.25039048  | -0.309039576 | 0.902181367 | d__Bacteria | p__Actinobacteria | c__Coriobacteriia | o__Coriobacteriales     | f__Coriobacteriaceae   | g__Collinsella              | s__Collinsella unknown_130            |
| MGYG-HGUT-01177:s__OEMR01 sp900199515                 | 0.971272035 | 0.0100940377 | 0.994649356 | d__Bacteria | p__Firmicutes     | c__Bacilli        | o__Erysipelotrichales   | f__Erysipelotrichaceae | g__OEMR01                   | s__OEMR01 sp900199515                 |
| MGYG-HGUT-01178:s__GCA-900066575 unknown_1            | 0.612931985 | 0.140437515  | 0.975671757 | d__Bacteria | p__Firmicutes_A   | c__Clostridia     | o__Lachnospirales       | f__Lachnospiraceae     | g__GCA-900066575            | s__GCA-900066575 unknown_1            |
| MGYG-HGUT-01182:s__CAG-269 sp000435535                | 0.032327176 | -0.586029017 | 0.768225834 | d__Bacteria | p__Firmicutes_A   | c__Clostridia     | o__TANB77               | f__CAG-508             | g__CAG-269                  | s__CAG-269 sp000435535                |
| MGYG-HGUT-01186:s__Agathobacter unknown_3             | 0.98029651  | -0.006660354 | 0.997647914 | d__Bacteria | p__Firmicutes_A   | c__Clostridia     | o__Lachnospirales       | f__Lachnospiraceae     | g__Agathobacter             | s__Agathobacter unknown_3             |
| MGYG-HGUT-01189:s__Blautia_A unknown_10               | 0.268018609 | 0.30909419   | 0.920494192 | d__Bacteria | p__Firmicutes_A   | c__Clostridia     | o__Lachnospirales       | f__Lachnospiraceae     | g__Blautia_A                | s__Blautia_A unknown_10               |
| MGYG-HGUT-01190:s__Collinsella unknown_133            | 0.496074504 | 0.188203097  | 0.968532073 | d__Bacteria | p__Actinobacteria | c__Coriobacteriia | o__Coriobacteriales     | f__Coriobacteriaceae   | g__Collinsella              | s__Collinsella unknown_133            |
| MGYG-HGUT-01191:s__Anaerovoracaceae unknown unknown_4 | 0.8424981   | 0.054582705  | 0.992878088 | d__Bacteria | p__Firmicutes_A   | c__Clostridia     | o__Peptostreptococcales | f__Anaerovoracaceae    | g__Anaerovoracaceae unknown | s__Anaerovoracaceae unknown unknown_4 |
| MGYG-HGUT-01193:s__UBA4285 unknown_1                  | 0.532305291 | 0.169994894  | 0.968532073 | d__Bacteria | p__Firmicutes_A   | c__Clostridia     | o__Lachnospirales       | f__Lachnospiraceae     | g__UBA4285                  | s__UBA4285 unknown_1                  |

|                                                       |                             |                                  |                             |                             |                                 |                           |                             |                               |                                   |                                                 |
|-------------------------------------------------------|-----------------------------|----------------------------------|-----------------------------|-----------------------------|---------------------------------|---------------------------|-----------------------------|-------------------------------|-----------------------------------|-------------------------------------------------|
| MGYG-HGUT-01195:s__CAG-508 unknown unknown_5          | 0.6<br>13<br>32<br>37<br>53 | -<br>0.1<br>41<br>85<br>07<br>52 | 0.9<br>75<br>67<br>17<br>57 | d_<br>_B<br>act<br>eri<br>a | p__Fi<br>rmicu<br>tes_A         | c__Clo<br>stridia         | o__TA<br>NB77               | f__CAG-<br>508                | g__CAG-<br>508<br>unknown         | s__CAG-508<br>unknown<br>unknown_5              |
| MGYG-HGUT-01197:s__Streptococcus unknown_7            | 0.9<br>45<br>98<br>79<br>3  | 0.0<br>18<br>90<br>64<br>19      | 0.9<br>94<br>47<br>94<br>74 | d_<br>_B<br>act<br>eri<br>a | p__Fi<br>rmicu<br>tes           | c__Ba<br>cilli            | o__Lac<br>tobacill<br>ales  | f__Stre<br>ptococc<br>aceae   | g__Strepto<br>coccus              | s__Streptococ<br>cus<br>unknown_7               |
| MGYG-HGUT-01199:s__Lachnospiraceae unknown unknown_13 | 0.6<br>73<br>65<br>70<br>01 | -<br>0.1<br>16<br>45<br>30<br>18 | 0.9<br>75<br>67<br>17<br>57 | d_<br>_B<br>act<br>eri<br>a | p__Fi<br>rmicu<br>tes_A         | c__Clo<br>stridia         | o__Lac<br>hnospi<br>rales   | f__Lach<br>nospirac<br>eae    | g__Lachno<br>spiraceae<br>unknown | s__Lachnospir<br>aceae<br>unknown<br>unknown_13 |
| MGYG-HGUT-01200:s__Collinsella unknown_135            | 0.4<br>08<br>22<br>36<br>3  | 0.2<br>30<br>17<br>71<br>16      | 0.9<br>39<br>70<br>92<br>5  | d_<br>_B<br>act<br>eri<br>a | p__A<br>ctino<br>bacte<br>riota | c__Co<br>riobac<br>teriia | o__Cor<br>iobact<br>eriales | f__Cori<br>obacteri<br>aceae  | g__Collins<br>ella                | s__Collinsella<br>unknown_13<br>5               |
| MGYG-HGUT-01202:s__Ruminococcus_D unknown_1           | 0.8<br>80<br>37<br>98<br>85 | -<br>0.0<br>40<br>19<br>37<br>71 | 0.9<br>94<br>47<br>94<br>74 | d_<br>_B<br>act<br>eri<br>a | p__Fi<br>rmicu<br>tes_A         | c__Clo<br>stridia         | o__Os<br>cillospi<br>rales  | f__Rumi<br>nococca<br>ceae    | g__Rumin<br>ococcus_D             | s__Ruminoco<br>ccus_D<br>unknown_1              |
| MGYG-HGUT-01204:s__NK3B98 unknown_1                   | 0.2<br>93<br>39<br>34<br>55 | 0.2<br>86<br>64<br>42<br>92      | 0.9<br>29<br>02<br>59<br>13 | d_<br>_B<br>act<br>eri<br>a | p__Fi<br>rmicu<br>tes_A         | c__Clo<br>stridia         | o__Os<br>cillospi<br>rales  | f__Oscil<br>lospirac<br>eae   | g__NK3B9<br>8                     | s__NK3B98<br>unknown_1                          |
| MGYG-HGUT-01205:s__Gemmiger unknown_6                 | 0.5<br>43<br>74<br>69<br>03 | 0.1<br>65<br>05<br>56<br>19      | 0.9<br>68<br>53<br>20<br>73 | d_<br>_B<br>act<br>eri<br>a | p__Fi<br>rmicu<br>tes_A         | c__Clo<br>stridia         | o__Os<br>cillospi<br>rales  | f__Rumi<br>nococca<br>ceae    | g__Gemmi<br>ger                   | s__Gemmiger<br>unknown_6                        |
| MGYG-HGUT-01210:s__Faecalibacillus unknown_3          | 0.6<br>36<br>24<br>16<br>39 | 0.1<br>32<br>57<br>65<br>44      | 0.9<br>75<br>67<br>17<br>57 | d_<br>_B<br>act<br>eri<br>a | p__Fi<br>rmicu<br>tes_A         | c__Clo<br>stridia         | o__Lac<br>hnospi<br>rales   | f__Lach<br>nospirac<br>eae    | g__Faecali<br>catena              | s__Faecalicat<br>ena<br>unknown_3               |
| MGYG-HGUT-01212:s__Acutalibacter unknown_3            | 0.1<br>84<br>88<br>52<br>25 | 0.3<br>68<br>58<br>71<br>17      | 0.8<br>91<br>82<br>55<br>59 | d_<br>_B<br>act<br>eri<br>a | p__Fi<br>rmicu<br>tes_A         | c__Clo<br>stridia         | o__Os<br>cillospi<br>rales  | f__Acut<br>alibacte<br>raceae | g__Acutali<br>bacter              | s__Acutalibac<br>ter<br>unknown_3               |

|                                                  |                             |                                  |                             |                             |                         |                   |                                   |                                |                                    |                                                 |
|--------------------------------------------------|-----------------------------|----------------------------------|-----------------------------|-----------------------------|-------------------------|-------------------|-----------------------------------|--------------------------------|------------------------------------|-------------------------------------------------|
| MGYG-HGUT-01216:s__CAG-354 unknown_3             | 0.8<br>41<br>94<br>86<br>22 | 0.0<br>54<br>57<br>46<br>98      | 0.9<br>92<br>87<br>80<br>88 | d_<br>_B<br>act<br>eri<br>a | p__Fi<br>rmicu<br>tes_A | c__Clo<br>stridia | o__TA<br>NB77                     | f__CAG-<br>508                 | g__CAG-<br>354                     | s__CAG-354<br>unknown_3                         |
| MGYG-HGUT-01219:s__CAG-56 unknown_3              | 0.2<br>64<br>41<br>53<br>92 | 0.3<br>10<br>98<br>87<br>51      | 0.9<br>14<br>20<br>30<br>83 | d_<br>_B<br>act<br>eri<br>a | p__Fi<br>rmicu<br>tes_A | c__Clo<br>stridia | o__Lac<br>hnospi<br>rales         | f__Lach<br>nospi<br>rac<br>eae | g__CAG-<br>56                      | s__CAG-56<br>unknown_3                          |
| MGYG-HGUT-01224:s__Blautia_A unknown_11          | 0.7<br>47<br>93<br>80<br>56 | 0.0<br>89<br>71<br>55<br>99      | 0.9<br>79<br>45<br>84<br>75 | d_<br>_B<br>act<br>eri<br>a | p__Fi<br>rmicu<br>tes_A | c__Clo<br>stridia | o__Lac<br>hnospi<br>rales         | f__Lach<br>nospi<br>rac<br>eae | g__Blautia<br>_A                   | s__Blautia_A<br>unknown_11                      |
| MGYG-HGUT-01225:s__Ruminiclostridium_C unknown_2 | 0.1<br>86<br>15<br>61<br>33 | 0.3<br>61<br>18<br>21<br>24      | 0.8<br>91<br>82<br>55<br>59 | d_<br>_B<br>act<br>eri<br>a | p__Fi<br>rmicu<br>tes_A | c__Clo<br>stridia | o__Os<br>cillospi<br>rales        | f__Oscil<br>lospirac<br>eae    | g__Rumini<br>clostridiu<br>m_C     | s__Ruminiclo<br>stridium_C<br>unknown_2         |
| MGYG-HGUT-01226:s__Oscillospiraceae unknown_4    | 0.1<br>32<br>01<br>99<br>24 | 0.4<br>01<br>73<br>61<br>51      | 0.8<br>91<br>82<br>55<br>59 | d_<br>_B<br>act<br>eri<br>a | p__Fi<br>rmicu<br>tes_A | c__Clo<br>stridia | o__Os<br>cillospi<br>rales        | f__Oscil<br>lospirac<br>eae    | g__Oscillo<br>spiraceae<br>unknown | s__Oscillospir<br>aceae<br>unknown<br>unknown_4 |
| MGYG-HGUT-01229:s__D5 sp900113995                | 0.8<br>57<br>15<br>53<br>83 | 0.0<br>47<br>81<br>98<br>31      | 0.9<br>92<br>87<br>80<br>88 | d_<br>_B<br>act<br>eri<br>a | p__Fi<br>rmicu<br>tes_A | c__Clo<br>stridia | o__Os<br>cillospi<br>rales        | f__Rumi<br>nococca<br>ceae     | g__D5                              | s__D5<br>sp900113995                            |
| MGYG-HGUT-01230:s__Eubacterium_R unknown_5       | 0.6<br>54<br>45<br>78<br>94 | -<br>0.1<br>25<br>08<br>94<br>46 | 0.9<br>75<br>67<br>17<br>57 | d_<br>_B<br>act<br>eri<br>a | p__Fi<br>rmicu<br>tes_A | c__Clo<br>stridia | o__Os<br>cillospi<br>rales        | f__Acut<br>alibacte<br>raceae  | g__Eubact<br>erium_R               | s__Eubacteriu<br>m_R<br>unknown_5               |
| MGYG-HGUT-01237:s__CAG-74 unknown_7              | 0.9<br>94<br>08<br>97<br>27 | 0.0<br>02<br>06<br>93            | 0.9<br>98<br>80<br>33<br>46 | d_<br>_B<br>act<br>eri<br>a | p__Fi<br>rmicu<br>tes_A | c__Clo<br>stridia | o__Chr<br>istense<br>nellale<br>s | f__CAG-<br>74                  | g__CAG-<br>74<br>unknown           | s__CAG-74<br>unknown<br>unknown_7               |
| MGYG-HGUT-01239:s__CAG-776 unknown_1             | 0.3<br>99<br>96<br>15<br>96 | 0.2<br>35<br>05<br>72            | 0.9<br>39<br>70<br>92<br>5  | d_<br>_B<br>act<br>eri<br>a | p__Fi<br>rmicu<br>tes   | c__Ba<br>cilli    | o__RF<br>39                       | f__CAG-<br>1000                | g__CAG-<br>776                     | s__CAG-776<br>unknown_1                         |



|                                                   |             |              |             |             |                 |                  |                       |                        |                            |                                   |
|---------------------------------------------------|-------------|--------------|-------------|-------------|-----------------|------------------|-----------------------|------------------------|----------------------------|-----------------------------------|
| MGYG-HGUT-01240:s__Prevotella unknown_17          | 0.6043826   | -0.144828839 | 0.975671757 | d__Bacteria | p__Bacteroidota | c__Bacteroidia   | o__Bacteroidales      | f__Bacteroidaceae      | g__Prevotella              | s__Prevotella unknown_17          |
| MGYG-HGUT-01244:s__UBA737 unknown_7               | 0.846300308 | -0.054452849 | 0.992878088 | d__Bacteria | p__Firmicutes_A | c__Clostridia    | o__Osillospirales     | f__Acetivibacteraceae  | g__UBA737                  | s__UBA737 unknown_7               |
| MGYG-HGUT-01246:s__Clostridium_M unknown_6        | 0.650603457 | 0.119919198  | 0.975671757 | d__Bacteria | p__Firmicutes_A | c__Clostridia    | o__Lachnospirales     | f__Lachnospiraceae     | g__Clostridium_M           | s__Clostridium_M unknown_6        |
| MGYG-HGUT-01247:s__Lachnospiraceae unknown_14     | 0.088348004 | 0.469171564  | 0.882716064 | d__Bacteria | p__Firmicutes_A | c__Clostridia    | o__Lachnospirales     | f__Lachnospiraceae     | g__Lachnospiraceae unknown | s__Lachnospiraceae unknown_14     |
| MGYG-HGUT-01248:s__Dialister unknown_6            | 0.362247793 | 0.251513326  | 0.93970925  | d__Bacteria | p__Firmicutes_C | c__Negativicutes | o__Veillonellales     | f__Dialisteraceae      | g__Dialister               | s__Dialister unknown_6            |
| MGYG-HGUT-01252:s__Lachnospiraceae unknown_15     | 0.126820252 | -0.425470584 | 0.891825559 | d__Bacteria | p__Firmicutes_A | c__Clostridia    | o__Lachnospirales     | f__Lachnospiraceae     | g__Lachnospiraceae unknown | s__Lachnospiraceae unknown_15     |
| MGYG-HGUT-01254:s__TF01-11 unknown_3              | 0.176200946 | -0.368592053 | 0.891825559 | d__Bacteria | p__Firmicutes_A | c__Clostridia    | o__Lachnospirales     | f__Lachnospiraceae     | g__TF01-11                 | s__TF01-11 unknown_3              |
| MGYG-HGUT-01255:s__Faecalibacterium prausnitzii_F | 0.406265266 | -0.231540952 | 0.93970925  | d__Bacteria | p__Firmicutes_A | c__Clostridia    | o__Osillospirales     | f__Ruminococcaceae     | g__Faecalibacterium        | s__Faecalibacterium prausnitzii_F |
| MGYG-HGUT-01257:s__Massilia unknown_3             | 0.50226     | 0.18829      | 0.96853     | d__Bacteria | p__Firmicutes   | c__Bacilli       | o__Erysipelotrichales | f__Erysipelotrichaceae | g__Massiliomicrobiota      | s__Massiliomicrobiota timonensis  |

|                                                       |                             |                                  |                             |                             |                                 |                           |                            |                               |                                    |                                                 |
|-------------------------------------------------------|-----------------------------|----------------------------------|-----------------------------|-----------------------------|---------------------------------|---------------------------|----------------------------|-------------------------------|------------------------------------|-------------------------------------------------|
| microbiota timonensis                                 | 83<br>07                    | 20<br>77                         | 20<br>73                    | eri<br>a                    |                                 |                           | richale<br>s               | ostridia<br>ceae              |                                    |                                                 |
| MGYG-HGUT-01273:s__Pauljensenia unknown_2             | 0.3<br>89<br>99<br>77<br>7  | 0.2<br>36<br>44<br>54<br>97      | 0.9<br>39<br>70<br>92<br>5  | d_<br>_B<br>act<br>eri<br>a | p__A<br>ctino<br>bacte<br>riota | c__Ac<br>tinoba<br>cteria | o__Act<br>inomyc<br>etales | f__Actin<br>omycet<br>aceae   | g__Pauljen<br>senia                | s__Pauljense<br>nia<br>unknown_2                |
| MGYG-HGUT-01274:s__Streptococcus unknown_8            | 0.3<br>46<br>92<br>54<br>25 | 0.2<br>62<br>37<br>66<br>02      | 0.9<br>39<br>70<br>92<br>5  | d_<br>_B<br>act<br>eri<br>a | p__Fi<br>rmicu<br>tes           | c__Ba<br>cilli            | o__Lac<br>tobacill<br>ales | f__Stre<br>ptococc<br>aceae   | g__Strepto<br>coccus               | s__Streptococ<br>cus<br>unknown_8               |
| MGYG-HGUT-01284:s__Pauljensenia unknown_3             | 0.3<br>13<br>44<br>30<br>88 | -<br>0.2<br>78<br>42<br>48<br>42 | 0.9<br>29<br>02<br>59<br>13 | d_<br>_B<br>act<br>eri<br>a | p__A<br>ctino<br>bacte<br>riota | c__Ac<br>tinoba<br>cteria | o__Act<br>inomyc<br>etales | f__Actin<br>omycet<br>aceae   | g__Pauljen<br>senia                | s__Pauljense<br>nia<br>unknown_3                |
| MGYG-HGUT-01285:s__Pauljensenia unknown_4             | 0.0<br>37<br>30<br>92<br>37 | -<br>0.5<br>76<br>71<br>15<br>91 | 0.7<br>68<br>22<br>58<br>34 | d_<br>_B<br>act<br>eri<br>a | p__A<br>ctino<br>bacte<br>riota | c__Ac<br>tinoba<br>cteria | o__Act<br>inomyc<br>etales | f__Actin<br>omycet<br>aceae   | g__Pauljen<br>senia                | s__Pauljense<br>nia<br>unknown_4                |
| MGYG-HGUT-01286:s__Oscillospiraceae unknown unknown_5 | 0.8<br>53<br>60<br>16<br>78 | 0.0<br>51<br>43<br>08<br>79      | 0.9<br>92<br>87<br>80<br>88 | d_<br>_B<br>act<br>eri<br>a | p__Fi<br>rmicu<br>tes_A         | c__Clo<br>stridia         | o__Os<br>cillospi<br>rales | f__Oscil<br>lospirac<br>eae   | g__Oscillo<br>spiraceae<br>unknown | s__Oscillospir<br>aceae<br>unknown<br>unknown_5 |
| MGYG-HGUT-01289:s__Streptococcus unknown_9            | 0.1<br>71<br>39<br>24<br>57 | 0.3<br>68<br>22<br>29<br>46      | 0.8<br>91<br>82<br>55<br>59 | d_<br>_B<br>act<br>eri<br>a | p__Fi<br>rmicu<br>tes           | c__Ba<br>cilli            | o__Lac<br>tobacill<br>ales | f__Stre<br>ptococc<br>aceae   | g__Strepto<br>coccus               | s__Streptococ<br>cus<br>unknown_9               |
| MGYG-HGUT-01292:s__Bifidobacterium infantis           | 0.5<br>41<br>82<br>71<br>96 | 0.1<br>68<br>17<br>38<br>18      | 0.9<br>68<br>53<br>20<br>73 | d_<br>_B<br>act<br>eri<br>a | p__A<br>ctino<br>bacte<br>riota | c__Ac<br>tinoba<br>cteria | o__Act<br>inomyc<br>etales | f__Bifid<br>obacteri<br>aceae | g__Bifidob<br>acterium             | s__Bifidobact<br>erium infantis                 |
| MGYG-HGUT-01293:s__Lactobacillus_C rhamnosus          | 0.1<br>84<br>45<br>88<br>77 | -<br>0.3<br>40<br>41<br>40<br>49 | 0.8<br>91<br>82<br>55<br>59 | d_<br>_B<br>act<br>eri<br>a | p__Fi<br>rmicu<br>tes           | c__Ba<br>cilli            | o__Lac<br>tobacill<br>ales | f__Lact<br>obacilla<br>ceae   | g__Lactob<br>acillus_C             | s__Lactobacill<br>us_C<br>rhamnosus             |
| MGYG-HGUT-01294:s__Parasutterella                     | 0.7<br>60<br>60             | -<br>0.0<br>85                   | 0.9<br>79<br>45             | d_<br>_B<br>act             | p__Pr<br>oteob                  | c__Ga<br>mmap<br>roteo    | o__Bur<br>kholde<br>riales | f__Burk<br>holderia<br>ceae   | g__Parasu<br>tterella              | s__Parasutter<br>ella                           |

|                                                                  |                             |                                  |                             |                             |                             |                        |                                   |                                          |                                   |                                             |
|------------------------------------------------------------------|-----------------------------|----------------------------------|-----------------------------|-----------------------------|-----------------------------|------------------------|-----------------------------------|------------------------------------------|-----------------------------------|---------------------------------------------|
| erella<br>excrementihominis                                      | 49<br>26                    | 09<br>13<br>61                   | 84<br>75                    | eri<br>a                    | acteri<br>a                 | bacter<br>ia           |                                   |                                          |                                   | excrementiho<br>minis                       |
| MGYG-HGUT-<br>01299:s__Absiella<br>dolichum                      | 0.5<br>77<br>63<br>51<br>69 | 0.1<br>54<br>12<br>13<br>27      | 0.9<br>75<br>67<br>17<br>57 | d_<br>_B<br>act<br>eri<br>a | p__Fi<br>rmicu<br>tes       | c__Ba<br>cilli         | o__Ery<br>sipelot<br>richale<br>s | f__Erysi<br>pelotric<br>haceae           | g__Absiell<br>a                   | s__Absiella<br>dolichum                     |
| MGYG-HGUT-<br>01300:s__Faecalib<br>acterium<br>prausnitzii_K     | 0.0<br>41<br>40<br>17<br>83 | 0.5<br>44<br>09<br>12<br>69      | 0.7<br>79<br>32<br>10<br>52 | d_<br>_B<br>act<br>eri<br>a | p__Fi<br>rmicu<br>tes_A     | c__Clo<br>stridia      | o__Os<br>cillospi<br>rales        | f__Rumi<br>nococca<br>ceae               | g__Faecali<br>bacterium           | s__Faecalibac<br>terium<br>prausnitzii_K    |
| MGYG-HGUT-<br>01302:s__Alistipes<br>putredinis                   | 0.7<br>32<br>58<br>42<br>73 | -<br>0.0<br>95<br>21<br>41<br>72 | 0.9<br>79<br>45<br>84<br>75 | d_<br>_B<br>act<br>eri<br>a | p__B<br>acter<br>oidot<br>a | c__Ba<br>cteroi<br>dia | o__Bac<br>teroida<br>les          | f__Rike<br>nellacea<br>e                 | g__Alistipe<br>s                  | s__Alistipes<br>putredinis                  |
| MGYG-HGUT-<br>01303:s__Dorea<br>scindens                         | 0.9<br>10<br>14<br>97<br>08 | 0.0<br>31<br>32<br>61<br>7       | 0.9<br>94<br>47<br>94<br>74 | d_<br>_B<br>act<br>eri<br>a | p__Fi<br>rmicu<br>tes_A     | c__Clo<br>stridia      | o__Lac<br>hnospi<br>rales         | f__Lach<br>nospi rac<br>eae              | g__Dorea                          | s__Dorea<br>scindens                        |
| MGYG-HGUT-<br>01304:s__Erysipela<br>tocolostridium<br>spiroforme | 0.6<br>53<br>52<br>33<br>78 | -<br>0.1<br>25<br>33<br>37<br>72 | 0.9<br>75<br>67<br>17<br>57 | d_<br>_B<br>act<br>eri<br>a | p__Fi<br>rmicu<br>tes       | c__Ba<br>cilli         | o__Ery<br>sipelot<br>richale<br>s | f__Erysi<br>pelatocl<br>ostridia<br>ceae | g__Erysipe<br>latoclostri<br>dium | s__Erysipelat<br>oclostridium<br>spiroforme |
| MGYG-HGUT-<br>01306:s__Bacteroi<br>des_A coprocola               | 0.3<br>19<br>23<br>02<br>81 | -<br>0.2<br>74<br>13<br>31<br>48 | 0.9<br>29<br>02<br>59<br>13 | d_<br>_B<br>act<br>eri<br>a | p__B<br>acter<br>oidot<br>a | c__Ba<br>cteroi<br>dia | o__Bac<br>teroida<br>les          | f__Bact<br>eroidac<br>eae                | g__Bacter<br>oides_A              | s__Bacteroides<br>_A coprocola              |
| MGYG-HGUT-<br>01308:s__Streptoc<br>occus infantarius             | 0.9<br>13<br>33<br>62<br>53 | 0.0<br>29<br>85<br>00<br>21      | 0.9<br>94<br>47<br>94<br>74 | d_<br>_B<br>act<br>eri<br>a | p__Fi<br>rmicu<br>tes       | c__Ba<br>cilli         | o__Lac<br>tobacill<br>ales        | f__Stre<br>ptococc<br>aceae              | g__Strepto<br>coccus              | s__Streptococ<br>cus<br>infantarius         |
| MGYG-HGUT-<br>01310:s__Faecalica<br>tena lactaris                | 0.8<br>76<br>52<br>21<br>28 | 0.0<br>42<br>52<br>63<br>52      | 0.9<br>94<br>47<br>94<br>74 | d_<br>_B<br>act<br>eri<br>a | p__Fi<br>rmicu<br>tes_A     | c__Clo<br>stridia      | o__Lac<br>hnospi<br>rales         | f__Lach<br>nospi rac<br>eae              | g__Faecali<br>catena              | s__Faecalicat<br>ena lactaris               |

|                                                       |                             |                                               |                             |                             |                             |                          |                                |                             |                                |                                          |
|-------------------------------------------------------|-----------------------------|-----------------------------------------------|-----------------------------|-----------------------------|-----------------------------|--------------------------|--------------------------------|-----------------------------|--------------------------------|------------------------------------------|
| MGYG-HGUT-01311:s__Clostridium_M sp000155435          | 0.3<br>95<br>36<br>16<br>6  | -<br>0.2<br>38<br>70<br>22<br>33<br>1         | 0.9<br>39<br>70<br>92<br>5  | d_<br>_B<br>act<br>eri<br>a | p__Fi<br>rmicu<br>tes_A     | c__Clo<br>stridia        | o__Lac<br>hnospi<br>rales      | f__Lach<br>nospi<br>rales   | g__Clostri<br>dium_M           | s__Clostridiu<br>m_M<br>sp000155435      |
| MGYG-HGUT-01313:s__Bacteroides eggerthii              | 0.2<br>71<br>35<br>59<br>54 | 0.3<br>07<br>27<br>40<br>02<br>66<br>74<br>61 | 0.9<br>25<br>40<br>66<br>61 | d_<br>_B<br>act<br>eri<br>a | p__B<br>acter<br>oidot<br>a | c__Ba<br>cteroi<br>dia   | o__Bac<br>teroida<br>les       | f__Bact<br>eroidac<br>eae   | g__Bacter<br>oides             | s__Bacteroides<br>eggerthii              |
| MGYG-HGUT-01314:s__Bacteroides_F pectinophilus        | 0.0<br>18<br>86<br>19<br>85 | 0.6<br>22<br>31<br>00<br>94                   | 0.7<br>68<br>22<br>58<br>34 | d_<br>_B<br>act<br>eri<br>a | p__Fi<br>rmicu<br>tes_A     | c__Clo<br>stridia        | o__Lac<br>hnospi<br>rales      | f__Lach<br>nospi<br>rales   | g__Bacter<br>oides_F           | s__Bacteroides<br>F<br>pectinophilus     |
| MGYG-HGUT-01315:s__Coproccoccus_B comes               | 0.2<br>81<br>34<br>94<br>6  | 0.2<br>94<br>84<br>28<br>36                   | 0.9<br>29<br>02<br>59<br>13 | d_<br>_B<br>act<br>eri<br>a | p__Fi<br>rmicu<br>tes_A     | c__Clo<br>stridia        | o__Lac<br>hnospi<br>rales      | f__Lach<br>nospi<br>rales   | g__Coprocc<br>occus_B          | s__Coproccoccus<br>B comes               |
| MGYG-HGUT-01316:s__Mitsuokella multacida              | 0.3<br>00<br>75<br>21<br>84 | 0.2<br>88<br>16<br>95<br>99                   | 0.9<br>29<br>02<br>59<br>13 | d_<br>_B<br>act<br>eri<br>a | p__Fi<br>rmicu<br>tes_C     | c__Ne<br>gativic<br>utes | o__Sel<br>enomo<br>nadale<br>s | f__Sele<br>nomona<br>daceae | g__Mitsuo<br>kella             | s__Mitsuokella<br>multacida              |
| MGYG-HGUT-01319:s__Butyrivibrio_A crossotus           | 0.7<br>62<br>41<br>00<br>38 | -<br>0.0<br>82<br>46<br>84<br>38<br>55        | 0.9<br>79<br>45<br>84<br>75 | d_<br>_B<br>act<br>eri<br>a | p__Fi<br>rmicu<br>tes_A     | c__Clo<br>stridia        | o__Lac<br>hnospi<br>rales      | f__Lach<br>nospi<br>rales   | g__Butyriv<br>ibrio_A          | s__Butyrivibrio<br>A crossotus           |
| MGYG-HGUT-01322:s__Gemmiger variable                  | 0.5<br>47<br>94<br>62<br>82 | 0.1<br>68<br>06<br>89<br>72                   | 0.9<br>68<br>53<br>20<br>73 | d_<br>_B<br>act<br>eri<br>a | p__Fi<br>rmicu<br>tes_A     | c__Clo<br>stridia        | o__Os<br>cillospi<br>rales     | f__Rumi<br>nococca<br>ceae  | g__Gemmi<br>ger                | s__Gemmiger<br>variable                  |
| MGYG-HGUT-01332:s__Massilioclostridium methylpentosum | 0.5<br>33<br>28<br>34<br>28 | -<br>0.1<br>58<br>55<br>29<br>39              | 0.9<br>68<br>53<br>20<br>73 | d_<br>_B<br>act<br>eri<br>a | p__Fi<br>rmicu<br>tes_A     | c__Clo<br>stridia        | o__Os<br>cillospi<br>rales     | f__Rumi<br>nococca<br>ceae  | g__Massili<br>oclostridiu<br>m | s__Massilioclostridium<br>methylpentosum |
| MGYG-HGUT-01334:s__Lactobacillus_B ruminis            | 0.7<br>35<br>81<br>99<br>41 | 0.0<br>85<br>93<br>78<br>92                   | 0.9<br>79<br>45<br>84<br>75 | d_<br>_B<br>act<br>eri<br>a | p__Fi<br>rmicu<br>tes       | c__Ba<br>cilli           | o__Lac<br>tobacill<br>ales     | f__Lact<br>obacilla<br>ceae | g__Lactob<br>acillus_B         | s__Lactobacillus<br>B ruminis            |

|                                              |                         |                              |                         |                  |                   |                   |                       |                        |                    |                              |
|----------------------------------------------|-------------------------|------------------------------|-------------------------|------------------|-------------------|-------------------|-----------------------|------------------------|--------------------|------------------------------|
| MGYG-HGUT-01337:s__Bacteroides fragilis      | 0.569<br>57<br>98<br>95 | -<br>0.155<br>24<br>75<br>38 | 0.973<br>85<br>57<br>64 | d__Bacteroidetes | p__Bacteroidetes  | c__Bacteroidia    | o__Bacteroidales      | f__Bacteroidaceae      | g__Bacteroides     | s__Bacteroides fragilis      |
| MGYG-HGUT-01338:s__Blautia_A wexlerae        | 0.247<br>58<br>91<br>66 | 0.297<br>53<br>15<br>23      | 0.902<br>18<br>13<br>67 | d__Bacteroidetes | p__Firmicutes     | c__Clostridia     | o__Lachnospirales     | f__Lachnospiraceae     | g__Blautia_A       | s__Blautia_A wexlerae        |
| MGYG-HGUT-01342:s__Streptococcus gordonii    | 0.291<br>91<br>02<br>84 | 0.283<br>83<br>64<br>2       | 0.929<br>02<br>59<br>13 | d__Bacteroidetes | p__Firmicutes     | c__Bacilli        | o__Lactobacillales    | f__Streptococcaceae    | g__Streptococcus   | s__Streptococcus gordonii    |
| MGYG-HGUT-01345:s__Bacteroides xylanisolvens | 0.306<br>86<br>73<br>02 | -<br>0.286<br>12<br>95<br>91 | 0.929<br>02<br>59<br>13 | d__Bacteroidetes | p__Bacteroidetes  | c__Bacteroidia    | o__Bacteroidales      | f__Bacteroidaceae      | g__Bacteroides     | s__Bacteroides xylanisolvens |
| MGYG-HGUT-01346:s__Bacteroides uniformis     | 0.859<br>27<br>20<br>77 | -<br>0.049<br>80<br>94<br>36 | 0.992<br>87<br>80<br>88 | d__Bacteroidetes | p__Bacteroidetes  | c__Bacteroidia    | o__Bacteroidales      | f__Bacteroidaceae      | g__Bacteroides     | s__Bacteroides uniformis     |
| MGYG-HGUT-01349:s__Veillonella parvula_A     | 0.468<br>57<br>68<br>01 | 0.201<br>99<br>22<br>59      | 0.968<br>19<br>40<br>79 | d__Bacteroidetes | p__Firmicutes     | c__Negativicutes  | o__Veillonellales     | f__Veillonellaceae     | g__Veillonella     | s__Veillonella parvula_A     |
| MGYG-HGUT-01352:s__Absiella sp000165065      | 0.002<br>22<br>66<br>61 | 0.828<br>17<br>17<br>5       | 0.648<br>12<br>43<br>72 | d__Bacteroidetes | p__Firmicutes     | c__Bacilli        | o__Erysipelotrichales | f__Erysipelotrichaceae | g__Absiella        | s__Absiella sp000165065      |
| MGYG-HGUT-01353:s__Collinsella aerofaciens_2 | 0.195<br>28<br>57<br>51 | 0.347<br>77<br>82<br>35      | 0.891<br>82<br>55<br>59 | d__Bacteroidetes | p__Actinobacteria | c__Coriobacteriia | o__Coriobacteriales   | f__Coriobacteriaceae   | g__Collinsella     | s__Collinsella aerofaciens_2 |
| MGYG-HGUT-01354:s__Bifidobacterium dentium   | 0.718<br>46<br>69<br>64 | -<br>0.100<br>31<br>75       | 0.979<br>45<br>84<br>75 | d__Bacteroidetes | p__Actinobacteria | c__Actinobacteria | o__Actinomycetales    | f__Bifidobacteriaceae  | g__Bifidobacterium | s__Bifidobacterium dentium   |

|                                                          |                             |                                  |                             |                             |                                       |                                        |                                   |                                   |                                    |                                                     |
|----------------------------------------------------------|-----------------------------|----------------------------------|-----------------------------|-----------------------------|---------------------------------------|----------------------------------------|-----------------------------------|-----------------------------------|------------------------------------|-----------------------------------------------------|
|                                                          |                             | 32<br>76                         |                             |                             |                                       |                                        |                                   |                                   |                                    |                                                     |
| MGYG-HGUT-01356:s__Lawsonibacter sp000177015             | 0.3<br>34<br>66<br>02<br>7  | 0.2<br>67<br>31<br>12<br>75      | 0.9<br>30<br>62<br>46<br>92 | d_<br>_B<br>act<br>eri<br>a | p__Fi<br>rmicu<br>tes_A               | c__Clo<br>stridia                      | o__Os<br>cillospi<br>rales        | f__Oscil<br>lospirac<br>eae       | g__Lawson<br>ibacter               | s__Lawsoniba<br>cter<br>sp000177015                 |
| MGYG-HGUT-01359:s__Bilophila wadsworthia                 | 0.0<br>22<br>01<br>93<br>42 | 0.6<br>20<br>22<br>53<br>75      | 0.7<br>68<br>22<br>58<br>34 | d_<br>_B<br>act<br>eri<br>a | p__D<br>esulf<br>obact<br>erota<br>_A | c__De<br>sulfovi<br>brioni<br>a        | o__De<br>sulfovi<br>brional<br>es | f__Desu<br>lfovibro<br>naceae     | g__Bilophil<br>a                   | s__Bilophila<br>wadsworthia                         |
| MGYG-HGUT-01360:s__Prevotella salivae                    | 0.1<br>90<br>06<br>69<br>39 | -<br>0.3<br>52<br>11<br>09<br>94 | 0.8<br>91<br>82<br>55<br>59 | d_<br>_B<br>act<br>eri<br>a | p__B<br>acter<br>oidot<br>a           | c__Ba<br>cteroi<br>dia                 | o__Bac<br>teroida<br>les          | f__Bact<br>eroidac<br>eae         | g__Prevot<br>ella                  | s__Prevotella<br>salivae                            |
| MGYG-HGUT-01361:s__Sutterella wadsworthensis_B           | 0.1<br>62<br>27<br>30<br>96 | 0.3<br>75<br>00<br>83<br>4       | 0.8<br>91<br>82<br>55<br>59 | d_<br>_B<br>act<br>eri<br>a | p__Pr<br>oteob<br>acteri<br>a         | c__Ga<br>mmap<br>roteo<br>bacter<br>ia | o__Bur<br>kholde<br>riales        | f__Burk<br>holderia<br>ceae       | g__Suttere<br>lla                  | s__Sutterella<br>wadsworthens<br>is_B               |
| MGYG-HGUT-01362:s__Streptococcus anginosus               | 0.0<br>76<br>42<br>79<br>78 | 0.4<br>84<br>65<br>07<br>43      | 0.8<br>77<br>82<br>62<br>47 | d_<br>_B<br>act<br>eri<br>a | p__Fi<br>rmicu<br>tes                 | c__Ba<br>cilli                         | o__Lac<br>tobacill<br>ales        | f__Stre<br>ptococc<br>aceae       | g__Strepto<br>coccus               | s__Streptococ<br>cus anginosus                      |
| MGYG-HGUT-01364:s__Bacteroides_A plebeius                | 0.1<br>56<br>18<br>18<br>07 | -<br>0.3<br>95<br>41<br>42<br>57 | 0.8<br>91<br>82<br>55<br>59 | d_<br>_B<br>act<br>eri<br>a | p__B<br>acter<br>oidot<br>a           | c__Ba<br>cteroi<br>dia                 | o__Bac<br>teroida<br>les          | f__Bact<br>eroidac<br>eae         | g__Bacter<br>oides_A               | s__Bacteroides<br>_A plebeius                       |
| MGYG-HGUT-01365:s__Phascolarctobacterium_A succinatutens | 0.8<br>33<br>97<br>57<br>83 | -<br>0.0<br>57<br>86<br>56<br>08 | 0.9<br>92<br>22<br>01<br>9  | d_<br>_B<br>act<br>eri<br>a | p__Fi<br>rmicu<br>tes_C               | c__Ne<br>gativic<br>utes               | o__Aci<br>damin<br>ococca<br>les  | f__Acid<br>aminoc<br>occacea<br>e | g__Phasco<br>larctobact<br>erium_A | s__Phascolar<br>ctobacterium_<br>A<br>succinatutens |
| MGYG-HGUT-01367:s__Clostridium_Q symbiosum               | 0.2<br>45<br>38<br>13<br>97 | 0.3<br>20<br>25<br>02<br>88      | 0.9<br>02<br>18<br>13<br>67 | d_<br>_B<br>act<br>eri<br>a | p__Fi<br>rmicu<br>tes_A               | c__Clo<br>stridia                      | o__Lac<br>hnospi<br>rales         | f__Lach<br>nospirac<br>eae        | g__Clostri<br>dium_Q               | s__Clostridiu<br>m_Q<br>symbiosum                   |
| MGYG-HGUT-01368:s__Faecalibacterium faecalicatena        | 0.4<br>56<br>73             | -<br>0.1<br>97                   | 0.9<br>65<br>57             | d_<br>_B<br>act             | p__Fi<br>rmicu<br>tes_A               | c__Clo<br>stridia                      | o__Lac<br>hnospi<br>rales         | f__Lach<br>nospirac<br>eae        | g__Faecali<br>catena               | s__Faecalicat<br>ena<br>fissicatena                 |

|                                                          |                             |                                  |                             |                             |                             |                        |                            |                             |                       |                                                  |
|----------------------------------------------------------|-----------------------------|----------------------------------|-----------------------------|-----------------------------|-----------------------------|------------------------|----------------------------|-----------------------------|-----------------------|--------------------------------------------------|
|                                                          | 62<br>27                    | 85<br>71<br>43                   | 46<br>92                    | eri<br>a                    |                             |                        |                            |                             |                       |                                                  |
| MGYG-HGUT-01369:s__Lactobacillus delbrueckii             | 0.3<br>19<br>72<br>63<br>22 | 0.2<br>76<br>80<br>37<br>81      | 0.9<br>29<br>02<br>59<br>13 | d_<br>_B<br>act<br>eri<br>a | p__Fi<br>rmicu<br>tes       | c__Ba<br>cilli         | o__Lac<br>tobacill<br>ales | f__Lact<br>obacilla<br>ceae | g__Lactob<br>acillus  | s__Lactobacill<br>us delbrueckii                 |
| MGYG-HGUT-01370:s__Bacteroides fluxus                    | 0.6<br>71<br>43<br>78<br>91 | 0.1<br>15<br>60<br>82<br>83      | 0.9<br>75<br>67<br>17<br>57 | d_<br>_B<br>act<br>eri<br>a | p__B<br>acter<br>oidot<br>a | c__Ba<br>cteroi<br>dia | o__Bac<br>teroida<br>les   | f__Bact<br>eroidac<br>eae   | g__Bacter<br>oides    | s__Bacteroides<br>fluxus                         |
| MGYG-HGUT-01372:s__Paraprevotella xylaniphila            | 0.7<br>81<br>77<br>70<br>7  | -<br>0.0<br>75<br>37<br>91<br>94 | 0.9<br>80<br>73<br>73<br>28 | d_<br>_B<br>act<br>eri<br>a | p__B<br>acter<br>oidot<br>a | c__Ba<br>cteroi<br>dia | o__Bac<br>teroida<br>les   | f__Bact<br>eroidac<br>eae   | g__Parapr<br>evotella | s__Paraprevot<br>ella<br>xylaniphila             |
| MGYG-HGUT-01373:s__Tyzzerella sp000209385                | 0.8<br>50<br>14<br>12<br>16 | -<br>0.0<br>53<br>12<br>61<br>39 | 0.9<br>92<br>87<br>80<br>88 | d_<br>_B<br>act<br>eri<br>a | p__Fi<br>rmicu<br>tes_A     | c__Clo<br>stridia      | o__Lac<br>hnospi<br>rales  | f__Lach<br>nospi<br>rales   | g__Tyzzer<br>ella     | s__Tyzzerella<br>sp000209385                     |
| MGYG-HGUT-01374:s__Faecalibacterium torques              | 0.2<br>13<br>82<br>73<br>68 | 0.3<br>46<br>84<br>11<br>61      | 0.8<br>91<br>82<br>55<br>59 | d_<br>_B<br>act<br>eri<br>a | p__Fi<br>rmicu<br>tes_A     | c__Clo<br>stridia      | o__Lac<br>hnospi<br>rales  | f__Lach<br>nospi<br>rales   | g__Faecali<br>catena  | s__Faecalicat<br>ena torques                     |
| MGYG-HGUT-01375:s__Ruminococcus_F champanellensis        | 0.6<br>05<br>33<br>52<br>19 | -<br>0.1<br>42<br>16<br>85       | 0.9<br>75<br>67<br>17<br>57 | d_<br>_B<br>act<br>eri<br>a | p__Fi<br>rmicu<br>tes_A     | c__Clo<br>stridia      | o__Os<br>cillospi<br>rales | f__Rumi<br>nococca<br>ceae  | g__Rumin<br>ococcus_F | s__Ruminoco<br>ccus_F<br>champanellen<br>sis     |
| MGYG-HGUT-01378:s__Bacteroides ovatus                    | 0.8<br>85<br>39<br>92<br>73 | 0.0<br>39<br>81<br>34<br>33      | 0.9<br>94<br>47<br>94<br>74 | d_<br>_B<br>act<br>eri<br>a | p__B<br>acter<br>oidot<br>a | c__Ba<br>cteroi<br>dia | o__Bac<br>teroida<br>les   | f__Bact<br>eroidac<br>eae   | g__Bacter<br>oides    | s__Bacteroides<br>ovatus                         |
| MGYG-HGUT-01379:s__Faecalibacterium glycyrrhizinilyticum | 0.1<br>83<br>69<br>04<br>34 | -<br>0.3<br>68<br>78<br>51<br>95 | 0.8<br>91<br>82<br>55<br>59 | d_<br>_B<br>act<br>eri<br>a | p__Fi<br>rmicu<br>tes_A     | c__Clo<br>stridia      | o__Lac<br>hnospi<br>rales  | f__Lach<br>nospi<br>rales   | g__Faecali<br>catena  | s__Faecalicat<br>ena<br>glycyrrhizinily<br>ticum |

|                                                  |             |               |             |                |                     |                   |                       |                        |                      |                                  |
|--------------------------------------------------|-------------|---------------|-------------|----------------|---------------------|-------------------|-----------------------|------------------------|----------------------|----------------------------------|
| MGYG-HGUT-01380:s__Faecalibacterium_gnavus       | 0.470493865 | -0.19955927   | 0.968194079 | d__Bacteriaria | p__Firmicutes_A     | c__Clostridia     | o__Lachnospirales     | f__Lachnospiraceae     | g__Faecalibacterium  | s__Faecalibacterium_gnavus       |
| MGYG-HGUT-01385:s__Alistipes_A_indistinctus      | 0.43230322  | 0.210638378   | 0.950806594 | d__Bacteriaria | p__Bacteroidota     | c__Bacteroidia    | o__Bacteroidales      | f__Rikenellaceae       | g__Alistipes_A       | s__Alistipes_A_indistinctus      |
| MGYG-HGUT-01386:s__Clostridium_M_clostridioforme | 0.845961846 | 0.05383870183 | 0.992878088 | d__Bacteriaria | p__Firmicutes_A     | c__Clostridia     | o__Lachnospirales     | f__Lachnospiraceae     | g__Clostridium_M     | s__Clostridium_M_clostridioforme |
| MGYG-HGUT-01387:s__Senegallimassilia_anaerobia   | 0.586452345 | 0.150370207   | 0.975671757 | d__Bacteriaria | p__Actinobacteriota | c__Coriobacteriia | o__Coriobacteriales   | f__Eggerthellaceae     | g__Senegallimassilia | s__Senegallimassilia_anaerobia   |
| MGYG-HGUT-01391:s__Coprobaacter_fastidiosus      | 0.770480418 | -0.080470412  | 0.979520484 | d__Bacteriaria | p__Bacteroidota     | c__Bacteroidia    | o__Bacteroidales      | f__Coprobaacteraceae   | g__Coprobaacter      | s__Coprobaacter_fastidiosus      |
| MGYG-HGUT-01396:s__Absiella_innocuum             | 0.532510069 | -0.17176433   | 0.968532073 | d__Bacteriaria | p__Firmicutes       | c__Bacilli        | o__Erysipelotrichales | f__Erysipelotrichaceae | g__Absiella          | s__Absiella_innocuum             |
| MGYG-HGUT-01397:s__Dialister_succinatiphilus     | 0.724020891 | 0.098283934   | 0.979458475 | d__Bacteriaria | p__Firmicutes_C     | c__Negativicutes  | o__Veillonellales     | f__Dialisteraceae      | g__Dialister         | s__Dialister_succinatiphilus     |
| MGYG-HGUT-01398:s__Absiella_sp000163515          | 0.854104527 | 0.050963141   | 0.992878088 | d__Bacteriaria | p__Firmicutes       | c__Bacilli        | o__Erysipelotrichales | f__Erysipelotrichaceae | g__Absiella          | s__Absiella_sp000163515          |
| MGYG-HGUT-01399:s__Odoribacter_laneus            | 0.084287971 | -0.468366064  | 0.882716064 | d__Bacteriaria | p__Bacteroidota     | c__Bacteroidia    | o__Bacteroidales      | f__Marinifilaceae      | g__Odoribacter       | s__Odoribacter_laneus            |



|                                                   |                             |                                  |                             |                             |                                 |                           |                                   |                                          |                                   |                                          |
|---------------------------------------------------|-----------------------------|----------------------------------|-----------------------------|-----------------------------|---------------------------------|---------------------------|-----------------------------------|------------------------------------------|-----------------------------------|------------------------------------------|
|                                                   |                             | 72<br>44                         |                             |                             |                                 |                           |                                   |                                          |                                   |                                          |
| MGYG-HGUT-01400:s__Erysipelatoclostridium ramosum | 0.7<br>47<br>92<br>23<br>67 | 0.0<br>89<br>80<br>35<br>47      | 0.9<br>79<br>45<br>84<br>75 | d_<br>_B<br>act<br>eri<br>a | p__Fi<br>rmicu<br>tes           | c__Ba<br>cilli            | o__Ery<br>sipelot<br>richale<br>s | f__Erysi<br>pelatocl<br>ostridia<br>ceae | g__Erysipe<br>latoclostri<br>dium | s__Erysipelat<br>oclostridium<br>ramosum |
| MGYG-HGUT-01402:s__Coproba<br>cillus cateniformis | 0.8<br>12<br>36<br>45<br>53 | -<br>0.0<br>66<br>52<br>84<br>65 | 0.9<br>87<br>14<br>23<br>02 | d_<br>_B<br>act<br>eri<br>a | p__Fi<br>rmicu<br>tes           | c__Ba<br>cilli            | o__Ery<br>sipelot<br>richale<br>s | f__Erysi<br>pelatocl<br>ostridia<br>ceae | g__Coproba<br>cillus              | s__Coproba<br>cillus<br>cateniformis     |
| MGYG-HGUT-01411:s__Pauljens<br>enia sp000308055   | 0.4<br>02<br>58<br>35<br>97 | 0.2<br>31<br>14<br>35<br>05      | 0.9<br>39<br>70<br>92<br>5  | d_<br>_B<br>act<br>eri<br>a | p__A<br>ctino<br>bacte<br>riota | c__Ac<br>tinoba<br>cteria | o__Act<br>inomyc<br>etales        | f__Actin<br>omycet<br>aceae              | g__Pauljen<br>senia               | s__Pauljense<br>nia<br>sp000308055       |
| MGYG-HGUT-01413:s__Enorma<br>massiliensis         | 0.7<br>30<br>27<br>48<br>8  | 0.0<br>95<br>47<br>00<br>83      | 0.9<br>79<br>45<br>84<br>75 | d_<br>_B<br>act<br>eri<br>a | p__A<br>ctino<br>bacte<br>riota | c__Co<br>riobac<br>teriia | o__Cor<br>iobact<br>eriales       | f__Cori<br>obacteri<br>aceae             | g__Enorm<br>a                     | s__Enorma<br>massiliensis                |
| MGYG-HGUT-01415:s__Alistipes<br>obesi             | 0.8<br>16<br>20<br>10<br>94 | -<br>0.0<br>63<br>30<br>70<br>11 | 0.9<br>87<br>66<br>45<br>39 | d_<br>_B<br>act<br>eri<br>a | p__B<br>acter<br>oidot<br>a     | c__Ba<br>cteroi<br>dia    | o__Bac<br>teroida<br>les          | f__Rike<br>nellacea<br>e                 | g__Alistipe<br>s                  | s__Alistipes<br>obesi                    |
| MGYG-HGUT-01420:s__Alistipes<br>senegalensis      | 0.7<br>18<br>91<br>36<br>44 | 0.0<br>99<br>14<br>88<br>74      | 0.9<br>79<br>45<br>84<br>75 | d_<br>_B<br>act<br>eri<br>a | p__B<br>acter<br>oidot<br>a     | c__Ba<br>cteroi<br>dia    | o__Bac<br>teroida<br>les          | f__Rike<br>nellacea<br>e                 | g__Alistipe<br>s                  | s__Alistipes<br>senegalensis             |
| MGYG-HGUT-01421:s__Dielma<br>fastidiosa           | 0.1<br>07<br>65<br>94<br>63 | 0.4<br>41<br>84<br>89<br>24      | 0.8<br>83<br>30<br>72<br>56 | d_<br>_B<br>act<br>eri<br>a | p__Fi<br>rmicu<br>tes           | c__Ba<br>cilli            | o__Ery<br>sipelot<br>richale<br>s | f__Erysi<br>pelotric<br>haceae           | g__Dielma                         | s__Dielma<br>fastidiosa                  |
| MGYG-HGUT-01422:s__Bacteroi<br>des oleiciplenus   | 0.1<br>37<br>53<br>71<br>75 | -<br>0.4<br>13<br>38<br>65<br>55 | 0.8<br>91<br>82<br>55<br>59 | d_<br>_B<br>act<br>eri<br>a | p__B<br>acter<br>oidot<br>a     | c__Ba<br>cteroi<br>dia    | o__Bac<br>teroida<br>les          | f__Bact<br>eroidac<br>eae                | g__Bacter<br>oides                | s__Bacteroi<br>des oleiciplenus          |
| MGYG-HGUT-01429:s__Alistipes<br>_A ihumii_1       | 0.3<br>95<br>74             | -<br>0.2<br>25                   | 0.9<br>39<br>70             | d_<br>_B<br>act             | p__B<br>acter                   | c__Ba<br>cteroi<br>dia    | o__Bac<br>teroida<br>les          | f__Rike<br>nellacea<br>e                 | g__Alistipe<br>s_A                | s__Alistipes_<br>A ihumii_1              |

|                                               |                             |                                              |                             |                             |                                 |                           |                                   |                                |                        |                                      |
|-----------------------------------------------|-----------------------------|----------------------------------------------|-----------------------------|-----------------------------|---------------------------------|---------------------------|-----------------------------------|--------------------------------|------------------------|--------------------------------------|
|                                               | 03<br>78                    | 84<br>29<br>98                               | 92<br>5                     | eri<br>a                    | oidot<br>a                      |                           |                                   |                                |                        |                                      |
| MGYG-HGUT-01430:s__Holdemania massiliensis    | 0.1<br>00<br>04<br>66<br>84 | 0.4<br>55<br>56<br>09<br>81                  | 0.8<br>83<br>30<br>72<br>56 | d_<br>_B<br>act<br>eri<br>a | p__Fi<br>rmicu<br>tes           | c__Ba<br>cilli            | o__Ery<br>sipelot<br>richale<br>s | f__Erysi<br>pelotric<br>haceae | g__Holde<br>mania      | s__Holdema<br>nia massiliensis       |
| MGYG-HGUT-01433:s__Bacteroides salyersiae     | 0.5<br>55<br>17<br>07<br>48 | -<br>0.1<br>63<br>53<br>01<br>20<br>66<br>73 | 0.9<br>68<br>53<br>20<br>73 | d_<br>_B<br>act<br>eri<br>a | p__B<br>acter<br>oidot<br>a     | c__Ba<br>cteroi<br>dia    | o__Bac<br>teroida<br>les          | f__Bact<br>eroidac<br>eae      | g__Bacter<br>oides     | s__Bacteroi<br>des salyersiae        |
| MGYG-HGUT-01434:s__Butyricoccus pullicaecorum | 0.6<br>80<br>36<br>43<br>51 | -<br>0.1<br>15<br>16<br>24<br>42             | 0.9<br>75<br>67<br>17<br>57 | d_<br>_B<br>act<br>eri<br>a | p__Fi<br>rmicu<br>tes_A         | c__Clo<br>stridia         | o__Os<br>cillospi<br>rales        | f__Buty<br>ricococ<br>ceae     | g__Butyric<br>ococcus  | s__Butyricoc<br>cus<br>pullicaecorum |
| MGYG-HGUT-01439:s__Tyzzerella sp000411335     | 0.1<br>90<br>78<br>36<br>31 | -<br>0.3<br>50<br>81<br>43<br>37             | 0.8<br>91<br>82<br>55<br>59 | d_<br>_B<br>act<br>eri<br>a | p__Fi<br>rmicu<br>tes_A         | c__Clo<br>stridia         | o__Lac<br>hnospi<br>rales         | f__Lach<br>nospi<br>rac<br>eae | g__Tyzzer<br>ella      | s__Tyzzerella<br>sp000411335         |
| MGYG-HGUT-01440:s__Acidaminococcus intestini  | 0.9<br>00<br>81<br>33<br>85 | 0.0<br>34<br>55<br>38<br>34                  | 0.9<br>94<br>47<br>94<br>74 | d_<br>_B<br>act<br>eri<br>a | p__Fi<br>rmicu<br>tes_C         | c__Ne<br>gativic<br>utes  | o__Aci<br>damin<br>ococca<br>les  | f__Acid<br>aminoc<br>occeae    | g__Acidam<br>inococcus | s__Acidamino<br>coccus<br>intestini  |
| MGYG-HGUT-01441:s__Pauljensenia sp000411415   | 0.4<br>81<br>16<br>68<br>8  | 0.1<br>94<br>61<br>22<br>98                  | 0.9<br>68<br>53<br>20<br>73 | d_<br>_B<br>act<br>eri<br>a | p__A<br>ctino<br>bacte<br>riota | c__Ac<br>tinoba<br>cteria | o__Act<br>inomyc<br>etales        | f__Actin<br>omycet<br>aceae    | g__Pauljen<br>senia    | s__Pauljense<br>nia<br>sp000411415   |
| MGYG-HGUT-01442:s__Streptococcus sp000411475  | 0.2<br>46<br>54<br>79<br>66 | 0.3<br>21<br>30<br>24<br>32                  | 0.9<br>02<br>18<br>13<br>67 | d_<br>_B<br>act<br>eri<br>a | p__Fi<br>rmicu<br>tes           | c__Ba<br>cilli            | o__Lac<br>tobacill<br>ales        | f__Stre<br>ptococ<br>ceae      | g__Strepto<br>coccus   | s__Streptococ<br>cus<br>sp000411475  |
| MGYG-HGUT-01444:s__Veillonella atypica        | 0.6<br>43<br>26<br>70<br>43 | 0.1<br>28<br>41<br>87<br>6                   | 0.9<br>75<br>67<br>17<br>57 | d_<br>_B<br>act<br>eri<br>a | p__Fi<br>rmicu<br>tes_C         | c__Ne<br>gativic<br>utes  | o__Veil<br>lonella<br>les         | f__Veill<br>onellace<br>ae     | g__Veillon<br>ella     | s__Veillonella<br>atypica            |
| MGYG-HGUT-01454:s__Bittarella massiliensis    | 0.8<br>72<br>63             | -<br>0.0<br>42                               | 0.9<br>94<br>47             | d_<br>_B<br>act             | p__Fi<br>rmicu<br>tes_A         | c__Clo<br>stridia         | o__Os<br>cillospi<br>rales        | f__Rumi<br>nococca<br>ceae     | g__Bittarel<br>la      | s__Bittarella<br>massiliensis        |

|                                                |                             |                                  |                             |                             |                                 |                           |                                   |                                |                        |                                       |
|------------------------------------------------|-----------------------------|----------------------------------|-----------------------------|-----------------------------|---------------------------------|---------------------------|-----------------------------------|--------------------------------|------------------------|---------------------------------------|
|                                                | 27<br>34                    | 56<br>58<br>26                   | 94<br>74                    | eri<br>a                    |                                 |                           |                                   |                                |                        |                                       |
| MGYG-HGUT-01455:s__Faecalitalea cylindroides   | 0.2<br>90<br>34<br>39<br>5  | -<br>0.2<br>93<br>46<br>19<br>03 | 0.9<br>29<br>02<br>59<br>13 | d_<br>_B<br>act<br>eri<br>a | p__Fi<br>rmicu<br>tes           | c__Ba<br>cilli            | o__Ery<br>sipelot<br>richale<br>s | f__Erysi<br>pelotric<br>haceae | g__Faecali<br>talea    | s__Faecalitale<br>a cylindroides      |
| MGYG-HGUT-01456:s__Eubacterium_I ramulus       | 0.7<br>90<br>17<br>77<br>36 | -<br>0.0<br>74<br>21<br>65<br>88 | 0.9<br>82<br>96<br>63       | d_<br>_B<br>act<br>eri<br>a | p__Fi<br>rmicu<br>tes_A         | c__Clo<br>stridia         | o__Lac<br>hnospi<br>rales         | f__Lach<br>nospi<br>rales      | g__Eubact<br>erium_I   | s__Eubacteriu<br>m_I ramulus          |
| MGYG-HGUT-01478:s__Collinsella sp000763055_2   | 0.4<br>61<br>75<br>42<br>19 | 0.2<br>05<br>16<br>78<br>21      | 0.9<br>65<br>57<br>46<br>92 | d_<br>_B<br>act<br>eri<br>a | p__A<br>ctino<br>bacte<br>riota | c__Co<br>riobac<br>teriia | o__Cor<br>iobact<br>eriales       | f__Cori<br>obacteri<br>aceae   | g__Collins<br>ella     | s__Collinsella<br>sp000763055<br>_2   |
| MGYG-HGUT-01489:s__Parabacteroides goldsteinii | 0.1<br>22<br>73<br>63<br>75 | -<br>0.3<br>87<br>33<br>67<br>94 | 0.8<br>85<br>74<br>21<br>75 | d_<br>_B<br>act<br>eri<br>a | p__B<br>acter<br>oidot<br>a     | c__Ba<br>cteroid<br>ia    | o__Bac<br>teroida<br>les          | f__Tann<br>erellace<br>ae      | g__Paraba<br>cteroides | s__Parabacte<br>roides<br>goldsteinii |
| MGYG-HGUT-01490:s__Bifidobacterium catenulatum | 0.1<br>00<br>22<br>58<br>32 | 0.4<br>42<br>68<br>57<br>43      | 0.8<br>83<br>30<br>72<br>56 | d_<br>_B<br>act<br>eri<br>a | p__A<br>ctino<br>bacte<br>riota | c__Ac<br>tinoba<br>cteria | o__Act<br>inomyc<br>etales        | f__Bifid<br>obacteri<br>aceae  | g__Bifidob<br>acterium | s__Bifidobact<br>erium<br>catenulatum |
| MGYG-HGUT-01493:s__Clostridium_M bolteae       | 0.8<br>05<br>99<br>79<br>96 | 0.0<br>67<br>47<br>38<br>5       | 0.9<br>87<br>14<br>23<br>02 | d_<br>_B<br>act<br>eri<br>a | p__Fi<br>rmicu<br>tes_A         | c__Clo<br>stridia         | o__Lac<br>hnospi<br>rales         | f__Lach<br>nospi<br>rales      | g__Clostri<br>dium_M   | s__Clostridiu<br>m_M bolteae          |
| MGYG-HGUT-01496:s__Dorea sp001185345           | 0.2<br>64<br>48<br>96<br>44 | 0.3<br>06<br>31<br>45<br>66      | 0.9<br>14<br>20<br>30<br>83 | d_<br>_B<br>act<br>eri<br>a | p__Fi<br>rmicu<br>tes_A         | c__Clo<br>stridia         | o__Lac<br>hnospi<br>rales         | f__Lach<br>nospi<br>rales      | g__Dorea               | s__Dorea<br>sp001185345               |
| MGYG-HGUT-01499:s__Faecalicatena contorta_B    | 0.9<br>00<br>95<br>99<br>24 | -<br>0.0<br>33<br>97<br>15<br>71 | 0.9<br>94<br>47<br>94<br>74 | d_<br>_B<br>act<br>eri<br>a | p__Fi<br>rmicu<br>tes_A         | c__Clo<br>stridia         | o__Lac<br>hnospi<br>rales         | f__Lach<br>nospi<br>rales      | g__Faecali<br>catena   | s__Faecalicat<br>ena<br>contorta_B    |

|                                                   |                             |                                  |                             |                             |                             |                        |                                     |                               |                       |                                              |
|---------------------------------------------------|-----------------------------|----------------------------------|-----------------------------|-----------------------------|-----------------------------|------------------------|-------------------------------------|-------------------------------|-----------------------|----------------------------------------------|
| MGYG-HGUT-01500:s__Lawsonibacter asaccharolyticus | 0.9<br>98<br>23<br>21<br>05 | 0.0<br>00<br>61<br>49<br>61      | 0.9<br>98<br>84<br>37<br>63 | d_<br>_B<br>act<br>eri<br>a | p__Fi<br>rmicu<br>tes_A     | c__Clo<br>stridia      | o__Os<br>cillospi<br>rales          | f__Oscil<br>lospirac<br>eae   | g__Lawson<br>ibacter  | s__Lawsoniba<br>cter<br>asaccharolytic<br>us |
| MGYG-HGUT-01502:s__Intestinimonas massiliensis    | 0.4<br>70<br>16<br>56<br>39 | 0.1<br>98<br>24<br>88<br>43      | 0.9<br>68<br>19<br>40<br>79 | d_<br>_B<br>act<br>eri<br>a | p__Fi<br>rmicu<br>tes_A     | c__Clo<br>stridia      | o__Os<br>cillospi<br>rales          | f__Oscil<br>lospirac<br>eae   | g__Intesti<br>nimonas | s__Intestinim<br>onas<br>massiliensis        |
| MGYG-HGUT-01512:s__Coprobaacter secundus          | 0.7<br>14<br>53<br>18<br>43 | -<br>0.1<br>02<br>66<br>21<br>03 | 0.9<br>79<br>45<br>84<br>75 | d_<br>_B<br>act<br>eri<br>a | p__B<br>acter<br>oidot<br>a | c__Ba<br>cteroi<br>dia | o__Bac<br>teroida<br>les            | f__Copr<br>obacter<br>aceae   | g__Copro<br>bacter    | s__Coproba<br>cter<br>secundus               |
| MGYG-HGUT-01527:s__Fournierella massiliensis      | 0.5<br>19<br>87<br>47<br>74 | -<br>0.1<br>79<br>53<br>90<br>55 | 0.9<br>68<br>53<br>20<br>73 | d_<br>_B<br>act<br>eri<br>a | p__Fi<br>rmicu<br>tes_A     | c__Clo<br>stridia      | o__Os<br>cillospi<br>rales          | f__Rumi<br>nococca<br>ceae    | g__Fourni<br>erella   | s__Fournierel<br>la<br>massiliensis          |
| MGYG-HGUT-01528:s__Faecalicatena sp001487105      | 0.4<br>96<br>23<br>02<br>84 | -<br>0.1<br>90<br>48<br>36<br>13 | 0.9<br>68<br>53<br>20<br>73 | d_<br>_B<br>act<br>eri<br>a | p__Fi<br>rmicu<br>tes_A     | c__Clo<br>stridia      | o__Lac<br>hnospi<br>rales           | f__Lach<br>nospirac<br>eae    | g__Faecal<br>icata    | s__Faecalicat<br>ena<br>sp001487105          |
| MGYG-HGUT-01531:s__Clostridium_M sp001517625      | 0.9<br>20<br>87<br>47<br>11 | 0.0<br>27<br>75<br>16<br>95      | 0.9<br>94<br>47<br>94<br>74 | d_<br>_B<br>act<br>eri<br>a | p__Fi<br>rmicu<br>tes_A     | c__Clo<br>stridia      | o__Lac<br>hnospi<br>rales           | f__Lach<br>nospirac<br>eae    | g__Clostri<br>dium_M  | s__Clostridiu<br>m_M<br>sp001517625          |
| MGYG-HGUT-01539:s__Acutalibacter timonensis       | 0.0<br>99<br>17<br>75<br>92 | 0.4<br>59<br>64<br>94<br>81      | 0.8<br>83<br>30<br>72<br>56 | d_<br>_B<br>act<br>eri<br>a | p__Fi<br>rmicu<br>tes_A     | c__Clo<br>stridia      | o__Os<br>cillospi<br>rales          | f__Acut<br>alibacte<br>raceae | g__Acutali<br>bacter  | s__Acutalibac<br>ter<br>timonensis           |
| MGYG-HGUT-01546:s__Alistipes sp900083545          | 0.2<br>50<br>36<br>45<br>62 | 0.3<br>21<br>47<br>86<br>9       | 0.9<br>02<br>18<br>13<br>67 | d_<br>_B<br>act<br>eri<br>a | p__B<br>acter<br>oidot<br>a | c__Ba<br>cteroi<br>dia | o__Bac<br>teroida<br>les            | f__Rike<br>nellacea<br>e      | g__Alistipe<br>s      | s__Alistipes<br>sp900083545                  |
| MGYG-HGUT-01547:s__Emergencia timonensis          | 0.0<br>63<br>70<br>05<br>55 | 0.4<br>83<br>62<br>04<br>32      | 0.8<br>57<br>21<br>13<br>2  | d_<br>_B<br>act<br>eri<br>a | p__Fi<br>rmicu<br>tes_A     | c__Clo<br>stridia      | o__Pe<br>ptostre<br>ptococ<br>cales | f__Anae<br>rorovac<br>eae     | g__Emerg<br>encia     | s__Emergenci<br>a<br>timonensis              |

|                                                    |                             |                                  |                             |                             |                             |                        |                                   |                                |                                |                                               |
|----------------------------------------------------|-----------------------------|----------------------------------|-----------------------------|-----------------------------|-----------------------------|------------------------|-----------------------------------|--------------------------------|--------------------------------|-----------------------------------------------|
| MGYG-HGUT-01550:s__Christensenella_A timonensis    | 0.4<br>82<br>36<br>77<br>99 | 0.1<br>94<br>03<br>47<br>48      | 0.9<br>68<br>53<br>20<br>73 | d_<br>_B<br>act<br>eri<br>a | p__Fi<br>rmicu<br>tes_A     | c__Clo<br>stridia      | o__Chr<br>istense<br>nellale<br>s | f__Chris<br>tensene<br>llaceae | g__Christe<br>nsenella_A       | s__Christense<br>nella_A<br>timonensis        |
| MGYG-HGUT-01551:s__Odoribacter massiliensis        | 0.5<br>96<br>27<br>82<br>67 | 0.1<br>47<br>04<br>38<br>32      | 0.9<br>75<br>67<br>17<br>57 | d_<br>_B<br>act<br>eri<br>a | p__B<br>acter<br>oidot<br>a | c__Ba<br>cteroi<br>dia | o__Bac<br>teroida<br>les          | f__Mari<br>nifilacea<br>e      | g__Odorib<br>acter             | s__Odoribact<br>er<br>massiliensis            |
| MGYG-HGUT-01558:s__Streptococcus timonensis        | 0.7<br>44<br>08<br>29<br>11 | 0.0<br>91<br>70<br>67<br>2       | 0.9<br>79<br>45<br>84<br>75 | d_<br>_B<br>act<br>eri<br>a | p__Fi<br>rmicu<br>tes       | c__Ba<br>cilli         | o__Lac<br>tobacill<br>ales        | f__Stre<br>ptococc<br>aceae    | g__Strepto<br>coccus           | s__Streptococ<br>cus<br>timonensis            |
| MGYG-HGUT-01560:s__Massilioclostridium coli        | 0.5<br>19<br>01<br>93<br>99 | -<br>0.1<br>72<br>60<br>04<br>71 | 0.9<br>68<br>53<br>20<br>73 | d_<br>_B<br>act<br>eri<br>a | p__Fi<br>rmicu<br>tes_A     | c__Clo<br>stridia      | o__Os<br>cillospi<br>rales        | f__Rumi<br>nococca<br>ceae     | g__Massili<br>oclostridiu<br>m | s__Massiliocl<br>ostridium coli               |
| MGYG-HGUT-01562:s__Alistipes timonensis            | 0.6<br>93<br>58<br>18<br>63 | 0.1<br>10<br>11<br>56<br>56      | 0.9<br>78<br>24<br>05<br>6  | d_<br>_B<br>act<br>eri<br>a | p__B<br>acter<br>oidot<br>a | c__Ba<br>cteroi<br>dia | o__Bac<br>teroida<br>les          | f__Rike<br>nellacea<br>e       | g__Alistipe<br>s               | s__Alistipes<br>timonensis                    |
| MGYG-HGUT-01564:s__Clostridium_M clostridioforme_A | 0.3<br>37<br>46<br>53<br>44 | -<br>0.2<br>63<br>11<br>70<br>18 | 0.9<br>30<br>62<br>46<br>92 | d_<br>_B<br>act<br>eri<br>a | p__Fi<br>rmicu<br>tes_A     | c__Clo<br>stridia      | o__Lac<br>hnospi<br>rales         | f__Lach<br>nospirac<br>eae     | g__Clostri<br>dium_M           | s__Clostridiu<br>m_M<br>clostridioform<br>e_A |
| MGYG-HGUT-01565:s__CAG-103 sp900317855_2           | 0.6<br>84<br>93<br>91<br>34 | 0.1<br>13<br>07<br>97<br>72      | 0.9<br>75<br>76<br>85<br>79 | d_<br>_B<br>act<br>eri<br>a | p__Fi<br>rmicu<br>tes_A     | c__Clo<br>stridia      | o__Os<br>cillospi<br>rales        | f__Oscil<br>lospirac<br>eae    | g__CAG-<br>103                 | s__CAG-103<br>sp900317855<br>_2               |
| MGYG-HGUT-01566:s__Tyzzerella unknown_3            | 0.1<br>89<br>71<br>12<br>98 | 0.3<br>38<br>78<br>10<br>87      | 0.8<br>91<br>82<br>55<br>59 | d_<br>_B<br>act<br>eri<br>a | p__Fi<br>rmicu<br>tes_A     | c__Clo<br>stridia      | o__Lac<br>hnospi<br>rales         | f__Lach<br>nospirac<br>eae     | g__Tyzzer<br>ella              | s__Tyzzerella<br>unknown_3                    |
| MGYG-HGUT-01569:s__Eubacterium_R coprostanoligenes | 0.3<br>15<br>73<br>24<br>19 | 0.2<br>81<br>27<br>84<br>83      | 0.9<br>29<br>02<br>59<br>13 | d_<br>_B<br>act<br>eri<br>a | p__Fi<br>rmicu<br>tes_A     | c__Clo<br>stridia      | o__Os<br>cillospi<br>rales        | f__Acut<br>alibacte<br>raceae  | g__Eubact<br>erium_R           | s__Eubacteriu<br>m_R<br>coprostanolig<br>enes |

|                                            |             |              |             |             |                     |                   |                         |                      |                  |                            |
|--------------------------------------------|-------------|--------------|-------------|-------------|---------------------|-------------------|-------------------------|----------------------|------------------|----------------------------|
| MGYG-HGUT-01571:s__Hungatella sp000526575  | 0.309426766 | -0.28443668  | 0.929025913 | d__Bacteria | p__Firmicutes_A     | c__Clostridia     | o__Lachnospirales       | f__Lachnospiraceae   | g__Hungatella    | s__Hungatella sp000526575  |
| MGYG-HGUT-01576:s__Oscillibacter unknown_8 | 0.558789349 | 0.15696492   | 0.968532073 | d__Bacteria | p__Firmicutes_A     | c__Clostridia     | o__Oscillospirales      | f__Oscillospiraceae  | g__Oscillibacter | s__Oscillibacter unknown_8 |
| MGYG-HGUT-01577:s__CAG-145 unknown_3       | 0.533461712 | -0.167913355 | 0.968532073 | d__Bacteria | p__Firmicutes_A     | c__Clostridia     | o__Peptostreptococcales | f__Anaerovoraceae    | g__CAG-145       | s__CAG-145 unknown_3       |
| MGYG-HGUT-01579:s__Collinsella unknown_147 | 0.221535217 | 0.333473146  | 0.891825559 | d__Bacteria | p__Actinobacteriota | c__Coriobacteriia | o__Coriobacteriales     | f__Coriobacteriaceae | g__Collinsella   | s__Collinsella unknown_147 |
| MGYG-HGUT-01580:s__Collinsella unknown_148 | 0.359590183 | 0.25152753   | 0.93970925  | d__Bacteria | p__Actinobacteriota | c__Coriobacteriia | o__Coriobacteriales     | f__Coriobacteriaceae | g__Collinsella   | s__Collinsella unknown_148 |
| MGYG-HGUT-01582:s__Collinsella unknown_150 | 0.488241114 | 0.19226759   | 0.968532073 | d__Bacteria | p__Actinobacteriota | c__Coriobacteriia | o__Coriobacteriales     | f__Coriobacteriaceae | g__Collinsella   | s__Collinsella unknown_150 |
| MGYG-HGUT-01583:s__Collinsella unknown_151 | 0.080849875 | 0.466080292  | 0.877826247 | d__Bacteria | p__Actinobacteriota | c__Coriobacteriia | o__Coriobacteriales     | f__Coriobacteriaceae | g__Collinsella   | s__Collinsella unknown_151 |
| MGYG-HGUT-01587:s__Collinsella unknown_155 | 0.254295049 | 0.315110107  | 0.905015696 | d__Bacteria | p__Actinobacteriota | c__Coriobacteriia | o__Coriobacteriales     | f__Coriobacteriaceae | g__Collinsella   | s__Collinsella unknown_155 |
| MGYG-HGUT-01594:s__Blautia_A unknown_12    | 0.403541888 | 0.225396693  | 0.93970925  | d__Bacteria | p__Firmicutes_A     | c__Clostridia     | o__Lachnospirales       | f__Lachnospiraceae   | g__Blautia_A     | s__Blautia_A unknown_12    |

|                                                       |                             |                                  |                             |                             |                             |                        |                            |                                      |                                   |                                             |
|-------------------------------------------------------|-----------------------------|----------------------------------|-----------------------------|-----------------------------|-----------------------------|------------------------|----------------------------|--------------------------------------|-----------------------------------|---------------------------------------------|
| MGYG-HGUT-01596:s__Blautia unknown_4                  | 0.2<br>46<br>36<br>64<br>97 | -<br>0.3<br>23<br>95<br>44<br>1  | 0.9<br>02<br>18<br>13<br>67 | d_<br>_B<br>act<br>eri<br>a | p__Fi<br>rmicu<br>tes_A     | c__Clo<br>stridia      | o__Lac<br>hnospi<br>rales  | f__Lach<br>nospirac<br>eae           | g__Blautia                        | s__Blautia<br>unknown_4                     |
| MGYG-HGUT-01597:s__UBA866 unknown                     | 0.6<br>30<br>59<br>38<br>19 | -<br>0.1<br>26<br>10<br>89<br>36 | 0.9<br>75<br>67<br>17<br>57 | d_<br>_B<br>act<br>eri<br>a | p__Fi<br>rmicu<br>tes_A     | c__Clo<br>stridia      | o__Os<br>cillospi<br>rales | f__Rumi<br>nococca<br>ceae           | g__UBA86<br>6                     | s__UBA866<br>unknown                        |
| MGYG-HGUT-01599:s__Bacteroides_A unknown_4            | 0.5<br>64<br>49<br>68<br>47 | 0.1<br>59<br>96<br>35<br>02      | 0.9<br>71<br>33<br>90<br>3  | d_<br>_B<br>act<br>eri<br>a | p__B<br>acter<br>oidot<br>a | c__Ba<br>cteroi<br>dia | o__Bac<br>teroida<br>les   | f__Bact<br>eroidac<br>eae            | g__Bacter<br>oides_A              | s__Bacteroides_A<br>unknown_4               |
| MGYG-HGUT-01602:s__Blautia unknown_5                  | 0.1<br>43<br>05<br>71<br>85 | 0.4<br>06<br>83<br>75<br>13      | 0.8<br>91<br>82<br>55<br>59 | d_<br>_B<br>act<br>eri<br>a | p__Fi<br>rmicu<br>tes_A     | c__Clo<br>stridia      | o__Lac<br>hnospi<br>rales  | f__Lach<br>nospirac<br>eae           | g__Blautia                        | s__Blautia<br>unknown_5                     |
| MGYG-HGUT-01603:s__Lachnospiraceae unknown unknown_16 | 0.3<br>76<br>63<br>87<br>79 | 0.2<br>45<br>41<br>4<br>5        | 0.9<br>39<br>70<br>92<br>5  | d_<br>_B<br>act<br>eri<br>a | p__Fi<br>rmicu<br>tes_A     | c__Clo<br>stridia      | o__Lac<br>hnospi<br>rales  | f__Lach<br>nospirac<br>eae           | g__Lachno<br>spiraceae<br>unknown | s__Lachnospiraceae<br>unknown<br>unknown_16 |
| MGYG-HGUT-01606:s__Clostridium_M unknown_8            | 0.8<br>38<br>57<br>80<br>38 | -<br>0.0<br>56<br>65<br>30<br>8  | 0.9<br>92<br>87<br>80<br>88 | d_<br>_B<br>act<br>eri<br>a | p__Fi<br>rmicu<br>tes_A     | c__Clo<br>stridia      | o__Lac<br>hnospi<br>rales  | f__Lach<br>nospirac<br>eae           | g__Clostri<br>dium_M              | s__Clostridium_M<br>unknown_8               |
| MGYG-HGUT-01607:s__Dorea sp900240315                  | 0.5<br>79<br>65<br>75<br>52 | 0.1<br>55<br>53<br>28<br>15      | 0.9<br>75<br>67<br>17<br>57 | d_<br>_B<br>act<br>eri<br>a | p__Fi<br>rmicu<br>tes_A     | c__Clo<br>stridia      | o__Lac<br>hnospi<br>rales  | f__Lach<br>nospirac<br>eae           | g__Dorea                          | s__Dorea<br>sp900240315                     |
| MGYG-HGUT-01610:s__Sporanaerobacter acetigenes        | 0.9<br>24<br>27<br>48<br>82 | 0.0<br>26<br>51<br>29<br>19      | 0.9<br>94<br>47<br>94<br>74 | d_<br>_B<br>act<br>eri<br>a | p__Fi<br>rmicu<br>tes_A     | c__Clo<br>stridia      | o__Tis<br>sierella<br>les  | f__Spor<br>anaerob<br>acterac<br>eae | g__Sporan<br>aerobacter           | s__Sporanaerobacter<br>acetigenes           |
| MGYG-HGUT-01619:s__UBA9502 unknown_5                  | 0.0<br>57<br>31<br>54<br>33 | 0.5<br>15<br>63<br>65<br>02      | 0.8<br>57<br>21<br>13<br>2  | d_<br>_B<br>act<br>eri<br>a | p__Fi<br>rmicu<br>tes_A     | c__Clo<br>stridia      | o__Lac<br>hnospi<br>rales  | f__Lach<br>nospirac<br>eae           | g__UBA95<br>02                    | s__UBA9502<br>unknown_5                     |

|                                                    |                             |                                  |                             |                             |                                       |                                 |                                   |                                          |                                  |                                           |
|----------------------------------------------------|-----------------------------|----------------------------------|-----------------------------|-----------------------------|---------------------------------------|---------------------------------|-----------------------------------|------------------------------------------|----------------------------------|-------------------------------------------|
| MGYG-HGUT-01622:s__Clostridium_M unknown_9         | 0.0<br>01<br>29<br>26<br>64 | 0.8<br>59<br>05<br>80<br>25      | 0.6<br>48<br>12<br>43<br>72 | d_<br>_B<br>act<br>eri<br>a | p__Fi<br>rmicu<br>tes_A               | c__Clo<br>stridia               | o__Lac<br>hnospi<br>rales         | f__Lach<br>nospi<br>rales                | g__Clostri<br>dium_M             | s__Clostridiu<br>m_M<br>unknown_9         |
| MGYG-HGUT-01626:s__Phascolarctobacterium unknown_2 | 0.9<br>79<br>55<br>49<br>85 | 0.0<br>07<br>17<br>48<br>79      | 0.9<br>97<br>64<br>79<br>14 | d_<br>_B<br>act<br>eri<br>a | p__Fi<br>rmicu<br>tes_C               | c__Ne<br>gativic<br>utes        | o__Aci<br>damin<br>ococca<br>les  | f__Acid<br>aminoc<br>occeae              | g__Phasco<br>larctobact<br>erium | s__Phascolar<br>ctobacterium<br>unknown_2 |
| MGYG-HGUT-01627:s__Gemmiger unknown_7              | 0.1<br>13<br>83<br>36<br>35 | 0.4<br>24<br>32<br>68<br>28      | 0.8<br>83<br>30<br>72<br>56 | d_<br>_B<br>act<br>eri<br>a | p__Fi<br>rmicu<br>tes_A               | c__Clo<br>stridia               | o__Os<br>cillospi<br>rales        | f__Rumi<br>nococca<br>ceae               | g__Gemmi<br>ger                  | s__Gemmiger<br>unknown_7                  |
| MGYG-HGUT-01631:s__Bilophila unknown_2             | 0.2<br>22<br>86<br>32<br>17 | 0.3<br>39<br>73<br>34<br>01      | 0.8<br>91<br>82<br>55<br>59 | d_<br>_B<br>act<br>eri<br>a | p__D<br>esulf<br>obact<br>erota<br>_A | c__De<br>sulfovi<br>brioni<br>a | o__De<br>sulfovi<br>brional<br>es | f__Desu<br>lfovibrio<br>naceae           | g__Bilophil<br>a                 | s__Bilophila<br>unknown_2                 |
| MGYG-HGUT-01632:s__CAG-170 unknown_4               | 0.1<br>18<br>22<br>64<br>68 | 0.4<br>09<br>14<br>35<br>33      | 0.8<br>83<br>30<br>72<br>56 | d_<br>_B<br>act<br>eri<br>a | p__Fi<br>rmicu<br>tes_A               | c__Clo<br>stridia               | o__Os<br>cillospi<br>rales        | f__Oscil<br>lospirac<br>eae              | g__CAG-<br>170                   | s__CAG-170<br>unknown_4                   |
| MGYG-HGUT-01634:s__Collinsella sp002232035_22      | 0.5<br>14<br>72<br>61<br>91 | 0.1<br>79<br>40<br>28<br>48      | 0.9<br>68<br>53<br>20<br>73 | d_<br>_B<br>act<br>eri<br>a | p__A<br>ctino<br>bacte<br>riota       | c__Co<br>riobac<br>teriia       | o__Cor<br>iobact<br>eriales       | f__Cori<br>obacteri<br>aceae             | g__Collins<br>ella               | s__Collinsella<br>sp002232035<br>_22      |
| MGYG-HGUT-01635:s__KLE1796 unknown                 | 0.1<br>35<br>84<br>57<br>83 | -<br>0.3<br>90<br>51<br>05<br>66 | 0.8<br>91<br>82<br>55<br>59 | d_<br>_B<br>act<br>eri<br>a | p__Fi<br>rmicu<br>tes                 | c__Ba<br>cilli                  | o__Ery<br>sipelot<br>richale<br>s | f__Erysi<br>pelatocl<br>ostridia<br>ceae | g__KLE179<br>6                   | s__KLE1796<br>unknown                     |
| MGYG-HGUT-01637:s__Agathobacter unknown_4          | 0.9<br>63<br>81<br>36<br>9  | 0.0<br>12<br>45<br>61<br>05      | 0.9<br>94<br>47<br>94<br>74 | d_<br>_B<br>act<br>eri<br>a | p__Fi<br>rmicu<br>tes_A               | c__Clo<br>stridia               | o__Lac<br>hnospi<br>rales         | f__Lach<br>nospi<br>rales                | g__Agathob<br>acter              | s__Agathobac<br>ter<br>unknown_4          |
| MGYG-HGUT-01642:s__Collinsella unknown_158         | 0.7<br>48<br>01<br>29<br>63 | 0.0<br>89<br>39<br>12<br>65      | 0.9<br>79<br>45<br>84<br>75 | d_<br>_B<br>act<br>eri<br>a | p__A<br>ctino<br>bacte<br>riota       | c__Co<br>riobac<br>teriia       | o__Cor<br>iobact<br>eriales       | f__Cori<br>obacteri<br>aceae             | g__Collins<br>ella               | s__Collinsella<br>unknown_15<br>8         |



|                                                          |             |               |             |             |                    |                |                       |                       |                               |                                          |
|----------------------------------------------------------|-------------|---------------|-------------|-------------|--------------------|----------------|-----------------------|-----------------------|-------------------------------|------------------------------------------|
| MGYG-HGUT-01645:s__Eubacterium_G unknown_2               | 0.877819689 | -0.041796781  | 0.994479474 | d__Bacteria | p__Firmicutes_A    | c__Clostridia  | o__Lachnospirales     | f__Lachnospiraceae    | g__Eubacterium_G              | s__Eubacterium_G unknown_2               |
| MGYG-HGUT-01652:s__V9D3004 sp002349525                   | 0.813688087 | 0.06445632336 | 0.987142302 | d__Bacteria | p__Firmicutes_A    | c__Clostridia  | o__Lachnospirales     | f__Lachnospiraceae    | g__V9D3004                    | s__V9D3004 sp002349525                   |
| MGYG-HGUT-01654:s__Acutalibacteraceae unknown unknown_15 | 0.946969894 | 0.01844349411 | 0.994479474 | d__Bacteria | p__Firmicutes_A    | c__Clostridia  | o__Osillospirales     | f__Acutalibacteraceae | g__Acutalibacteraceae unknown | s__Acutalibacteraceae unknown unknown_15 |
| MGYG-HGUT-01655:s__Butyrimonas sp900258545               | 0.117788584 | 0.435582751   | 0.883307256 | d__Bacteria | p__Bacteroidetes_A | c__Bacteroidia | o__Bacteroidales      | f__Marinifilaceae     | g__Butyrimonas                | s__Butyrimonas sp900258545               |
| MGYG-HGUT-01658:s__CAG-74 unknown unknown_8              | 0.114007873 | 0.430280356   | 0.883307256 | d__Bacteria | p__Firmicutes_A    | c__Clostridia  | o__Christensenellales | f__CAG-74             | g__CAG-74 unknown             | s__CAG-74 unknown unknown_8              |
| MGYG-HGUT-01659:s__Paraprevotella unknown_3              | 0.967583754 | -0.011407873  | 0.994479474 | d__Bacteria | p__Bacteroidetes_A | c__Bacteroidia | o__Bacteroidales      | f__Bacteroidaceae     | g__Paraprevotella             | s__Paraprevotella unknown_3              |
| MGYG-HGUT-01661:s__Bacteroides gallinarum                | 0.337886785 | 0.266872438   | 0.930624692 | d__Bacteria | p__Bacteroidetes_A | c__Bacteroidia | o__Bacteroidales      | f__Bacteroidaceae     | g__Bacteroides                | s__Bacteroides gallinarum                |
| MGYG-HGUT-01665:s__QALW01 unknown unknown_1              | 0.976211414 | 0.00838527892 | 0.996587801 | d__Bacteria | p__Firmicutes_A    | c__Clostridia  | o__Christensenellales | f__QALW01             | g__QALW01 unknown             | s__QALW01 unknown unknown_1              |
| MGYG-HGUT-01670:s__Bacteroides_B sartorii                | 0.396935402 | 0.236130867   | 0.93970925  | d__Bacteria | p__Bacteroidetes_A | c__Bacteroidia | o__Bacteroidales      | f__Bacteroidaceae     | g__Bacteroides_B              | s__Bacteroides_B sartorii                |

|                                                         |             |               |             |            |                 |               |                       |                               |                                       |                                         |
|---------------------------------------------------------|-------------|---------------|-------------|------------|-----------------|---------------|-----------------------|-------------------------------|---------------------------------------|-----------------------------------------|
| MGYG-HGUT-01671:s__Clostridia unknown unknown unknown_1 | 0.6067517   | 0.14442523    | 0.975671757 | d__Bacteri | p__Firmicutes_A | c__Clostridia | o__Clostridia unknown | f__Clostridia unknown unknown | g__Clostridia unknown unknown unknown | s__Clostridia unknown unknown unknown_1 |
| MGYG-HGUT-01673:s__UBA1255 unknown unknown_5            | 0.858791025 | 0.049783387   | 0.992878088 | d__Bacteri | p__Firmicutes_A | c__Clostridia | o__UBA1212            | f__UBA1255                    | g__UBA1255 unknown                    | s__UBA1255 unknown unknown_5            |
| MGYG-HGUT-01677:s__CAG-452 sp000434035                  | 0.996496435 | -0.0010123314 | 0.998803346 | d__Bacteri | p__Firmicutes_A | c__Clostridia | o__TANB77             | f__CAG-508                    | g__CAG-452                            | s__CAG-452 sp000434035                  |
| MGYG-HGUT-01681:s__Ruminococcus unknown_2               | 0.223126389 | 0.335649241   | 0.891825559 | d__Bacteri | p__Firmicutes_A | c__Clostridia | o__Oscillospirales    | f__Ruminococcales             | g__Ruminococcus                       | s__Ruminococcus unknown_2               |
| MGYG-HGUT-01683:s__UBA7096 unknown_2                    | 0.713646168 | 0.103098187   | 0.979458475 | d__Bacteri | p__Firmicutes_A | c__Clostridia | o__Lachnospirales     | f__Lachnospiraceae            | g__UBA7096                            | s__UBA7096 unknown_2                    |
| MGYG-HGUT-01687:s__Dorea sp000433535                    | 0.298498912 | 0.289272928   | 0.929025913 | d__Bacteri | p__Firmicutes_A | c__Clostridia | o__Lachnospirales     | f__Lachnospiraceae            | g__Dorea                              | s__Dorea sp000433535                    |
| MGYG-HGUT-01689:s__Blautia producta                     | 0.433116954 | -0.216761851  | 0.950806594 | d__Bacteri | p__Firmicutes_A | c__Clostridia | o__Lachnospirales     | f__Lachnospiraceae            | g__Blautia                            | s__Blautia producta                     |
| MGYG-HGUT-01690:s__Ruminococcus_G gauvreauii            | 0.131125114 | -0.391728504  | 0.89182559  | d__Bacteri | p__Firmicutes_A | c__Clostridia | o__Lachnospirales     | f__Lachnospiraceae            | g__Ruminococcus_G                     | s__Ruminococcus_G gauvreauii            |
| MGYG-HGUT-01694:s__Enterococcus faecalis                | 0.08314     | -0.46133      | 0.88114     | d__Bacteri | p__Firmicutes   | c__Bacilli    | o__Lactobacillales    | f__Enterococcales             | g__Enterococcus                       | s__Enterococcus faecalis                |

|                                                         |                             |                                  |                             |                             |                                 |                                        |                                   |                                          |                                   |                                                    |
|---------------------------------------------------------|-----------------------------|----------------------------------|-----------------------------|-----------------------------|---------------------------------|----------------------------------------|-----------------------------------|------------------------------------------|-----------------------------------|----------------------------------------------------|
|                                                         | 17<br>21                    | 93<br>8                          | 28<br>43                    | eri<br>a                    |                                 |                                        |                                   |                                          |                                   |                                                    |
| MGYG-HGUT-01697:s__Erysipelatoclostridium saccharogumia | 0.2<br>99<br>18<br>83<br>89 | 0.2<br>88<br>99<br>83<br>32      | 0.9<br>29<br>02<br>59<br>13 | d_<br>_B<br>act<br>eri<br>a | p__Fi<br>rmicu<br>tes           | c__Ba<br>cilli                         | o__Ery<br>sipelot<br>richale<br>s | f__Erysi<br>pelatocl<br>ostridia<br>ceae | g__Erysipe<br>latoclostri<br>dium | s__Erysipelat<br>oclostridium<br>saccharogumi<br>a |
| MGYG-HGUT-01698:s__Marvinbryantia formatexigens         | 0.0<br>03<br>98<br>95<br>74 | 0.7<br>54<br>61<br>83<br>6       | 0.6<br>48<br>12<br>43<br>72 | d_<br>_B<br>act<br>eri<br>a | p__Fi<br>rmicu<br>tes_A         | c__Clo<br>stridia                      | o__Lac<br>hnospi<br>rales         | f__Lach<br>nospi<br>rales                | g__Marvin<br>bryantia             | s__Marvinbry<br>antia<br>formatexigen<br>s         |
| MGYG-HGUT-01704:s__Blautia hansenii                     | 0.8<br>48<br>38<br>41<br>51 | 0.0<br>52<br>96<br>05<br>16      | 0.9<br>92<br>87<br>80<br>88 | d_<br>_B<br>act<br>eri<br>a | p__Fi<br>rmicu<br>tes_A         | c__Clo<br>stridia                      | o__Lac<br>hnospi<br>rales         | f__Lach<br>nospi<br>rales                | g__Blautia                        | s__Blautia<br>hansenii                             |
| MGYG-HGUT-01705:s__Citrobacter portucalensis            | 0.9<br>27<br>81<br>16<br>63 | 0.0<br>24<br>71<br>91<br>06      | 0.9<br>94<br>47<br>94<br>74 | d_<br>_B<br>act<br>eri<br>a | p__Pr<br>oteob<br>acteri<br>a   | c__Ga<br>mmap<br>roteo<br>bacter<br>ia | o__Ent<br>erobac<br>terales       | f__Ente<br>robacte<br>riaceae            | g__Citroba<br>cter                | s__Citrobacte<br>r<br>portucalensis                |
| MGYG-HGUT-01707:s__Coproccoccus sp000154245             | 0.6<br>44<br>58<br>52<br>95 | -<br>0.1<br>28<br>87<br>60<br>18 | 0.9<br>75<br>67<br>17<br>57 | d_<br>_B<br>act<br>eri<br>a | p__Fi<br>rmicu<br>tes_A         | c__Clo<br>stridia                      | o__Lac<br>hnospi<br>rales         | f__Lach<br>nospi<br>rales                | g__Coprocc<br>occus               | s__Coproccoc<br>cus<br>sp000154245                 |
| MGYG-HGUT-01711:s__Holdemanna biformis                  | 0.3<br>51<br>39<br>57<br>05 | 0.2<br>58<br>70<br>09<br>73      | 0.9<br>39<br>70<br>92<br>5  | d_<br>_B<br>act<br>eri<br>a | p__Fi<br>rmicu<br>tes           | c__Ba<br>cilli                         | o__Ery<br>sipelot<br>richale<br>s | f__Erysi<br>pelotric<br>haceae           | g__Holde<br>manella               | s__Holdeman<br>ella biformis                       |
| MGYG-HGUT-01714:s__Coproccoccus_A catus                 | 0.8<br>50<br>82<br>20<br>03 | 0.0<br>52<br>50<br>13<br>7       | 0.9<br>92<br>87<br>80<br>88 | d_<br>_B<br>act<br>eri<br>a | p__Fi<br>rmicu<br>tes_A         | c__Clo<br>stridia                      | o__Lac<br>hnospi<br>rales         | f__Lach<br>nospi<br>rales                | g__Coprocc<br>occus_A             | s__Coproccoc<br>cus_A catus                        |
| MGYG-HGUT-01718:s__Collinsella unknown_164              | 0.0<br>37<br>84<br>97<br>02 | 0.5<br>51<br>60<br>17<br>38      | 0.7<br>68<br>22<br>58<br>34 | d_<br>_B<br>act<br>eri<br>a | p__A<br>ctino<br>bacte<br>riota | c__Co<br>riobac<br>teriia              | o__Cor<br>iobact<br>eriales       | f__Cori<br>obacteri<br>aceae             | g__Collins<br>ella                | s__Collinsella<br>unknown_16<br>4                  |
| MGYG-HGUT-01720:s__Prevotella sp002350355               | 0.9<br>70<br>55<br>52<br>96 | 0.0<br>09<br>71<br>68<br>93      | 0.9<br>94<br>48<br>52<br>72 | d_<br>_B<br>act<br>eri<br>a | p__B<br>acter<br>oidot<br>a     | c__Ba<br>cteroid<br>ia                 | o__Bac<br>teroida<br>les          | f__Bact<br>eroidac<br>eae                | g__Prevot<br>ella                 | s__Prevotella<br>sp002350355                       |

|                                              |                             |                                  |                             |                             |                                 |                           |                                     |                                |                      |                                     |
|----------------------------------------------|-----------------------------|----------------------------------|-----------------------------|-----------------------------|---------------------------------|---------------------------|-------------------------------------|--------------------------------|----------------------|-------------------------------------|
| MGYG-HGUT-01722:s__Eubacterium_F unknown_1   | 0.1<br>77<br>89<br>56<br>79 | 0.3<br>60<br>24<br>91<br>83      | 0.8<br>91<br>82<br>55<br>59 | d_<br>_B<br>act<br>eri<br>a | p__Fi<br>rmicu<br>tes_A         | c__Clo<br>stridia         | o__Lac<br>hnoSpi<br>rales           | f__Lach<br>nospi<br>rac<br>eae | g__Eubact<br>erium_F | s__Eubacteriu<br>m_F<br>unknown_1   |
| MGYG-HGUT-01727:s__UBA1191 unknown_2         | 0.3<br>63<br>17<br>04<br>79 | -<br>0.2<br>39<br>24<br>54<br>14 | 0.9<br>39<br>70<br>92<br>5  | d_<br>_B<br>act<br>eri<br>a | p__Fi<br>rmicu<br>tes_A         | c__Clo<br>stridia         | o__Pe<br>ptostre<br>ptococ<br>cales | f__Anaer<br>ovorac<br>eae      | g__UBA11<br>91       | s__UBA1191<br>unknown_2             |
| MGYG-HGUT-01732:s__UBA1381 unknown           | 0.7<br>40<br>99<br>26<br>91 | -<br>0.0<br>92<br>57<br>37<br>36 | 0.9<br>79<br>45<br>84<br>75 | d_<br>_B<br>act<br>eri<br>a | p__Fi<br>rmicu<br>tes_A         | c__Clo<br>stridia         | o__Mo<br>noglob<br>ales             | f__UBA<br>1381                 | g__UBA13<br>81       | s__UBA1381<br>unknown               |
| MGYG-HGUT-01733:s__CAG-83 unknown_4          | 0.8<br>63<br>26<br>17<br>66 | -<br>0.0<br>47<br>63<br>25<br>32 | 0.9<br>94<br>47<br>94<br>74 | d_<br>_B<br>act<br>eri<br>a | p__Fi<br>rmicu<br>tes_A         | c__Clo<br>stridia         | o__Osc<br>illoSpi<br>rales          | f__Oscil<br>lospirac<br>eae    | g__CAG-<br>83        | s__CAG-83<br>unknown_4              |
| MGYG-HGUT-01734:s__Collinsella unknown_169   | 0.9<br>32<br>05<br>24<br>77 | 0.0<br>23<br>77<br>53<br>4       | 0.9<br>94<br>47<br>94<br>74 | d_<br>_B<br>act<br>eri<br>a | p__A<br>ctino<br>bacte<br>riota | c__Co<br>riobac<br>teriia | o__Cor<br>iobact<br>eriales         | f__Cori<br>obacteri<br>aceae   | g__Collins<br>ella   | s__Collinsella<br>unknown_16<br>9   |
| MGYG-HGUT-01736:s__Collinsella unknown_170   | 0.4<br>81<br>80<br>69<br>55 | 0.1<br>92<br>11<br>59<br>58      | 0.9<br>68<br>53<br>20<br>73 | d_<br>_B<br>act<br>eri<br>a | p__A<br>ctino<br>bacte<br>riota | c__Co<br>riobac<br>teriia | o__Cor<br>iobact<br>eriales         | f__Cori<br>obacteri<br>aceae   | g__Collins<br>ella   | s__Collinsella<br>unknown_17<br>0   |
| MGYG-HGUT-01737:s__Eubacterium_R sp000434995 | 0.4<br>30<br>15<br>99<br>47 | -<br>0.2<br>18<br>22<br>70<br>97 | 0.9<br>50<br>80<br>65<br>94 | d_<br>_B<br>act<br>eri<br>a | p__Fi<br>rmicu<br>tes_A         | c__Clo<br>stridia         | o__Osc<br>illoSpi<br>rales          | f__Acut<br>alibacte<br>raceae  | g__Eubact<br>erium_R | s__Eubacteriu<br>m_R<br>sp000434995 |
| MGYG-HGUT-01742:s__Oscillibacter unknown_10  | 0.2<br>45<br>02<br>11<br>85 | -<br>0.3<br>00<br>59<br>98<br>45 | 0.9<br>02<br>18<br>13<br>67 | d_<br>_B<br>act<br>eri<br>a | p__Fi<br>rmicu<br>tes_A         | c__Clo<br>stridia         | o__Osc<br>illoSpi<br>rales          | f__Oscil<br>lospirac<br>eae    | g__Oscillib<br>acter | s__Oscillibact<br>er<br>unknown_10  |
| MGYG-HGUT-01744:s__Collinsella unknown_172   | 0.5<br>27<br>79             | 0.1<br>71<br>33                  | 0.9<br>68<br>53             | d_<br>_B<br>act             | p__A<br>ctino                   | c__Co<br>riobac<br>teriia | o__Cor<br>iobact<br>eriales         | f__Cori<br>obacteri<br>aceae   | g__Collins<br>ella   | s__Collinsella<br>unknown_17<br>2   |

|                                            |                             |                                  |                             |                             |                                 |                           |                             |                               |                      |                                 |
|--------------------------------------------|-----------------------------|----------------------------------|-----------------------------|-----------------------------|---------------------------------|---------------------------|-----------------------------|-------------------------------|----------------------|---------------------------------|
|                                            | 89<br>06                    | 85<br>02                         | 20<br>73                    | eri<br>a                    | bacte<br>riota                  |                           |                             |                               |                      |                                 |
| MGYG-HGUT-01745:s__Coproccoccus unknown_2  | 0.2<br>75<br>96<br>60<br>92 | 0.2<br>91<br>56<br>45<br>67      | 0.9<br>29<br>02<br>59<br>13 | d_<br>_B<br>act<br>eri<br>a | p__Fi<br>rmicu<br>tes_A         | c__Clo<br>stridia         | o__Lac<br>hnoSpi<br>rales   | f__Lach<br>nospira<br>ceae    | g__Copro<br>coccus   | s__Copro<br>coccus<br>unknown_2 |
| MGYG-HGUT-01748:s__CAG-56 unknown_4        | 0.7<br>60<br>07<br>04<br>41 | 0.0<br>85<br>23<br>79<br>8       | 0.9<br>79<br>45<br>84<br>75 | d_<br>_B<br>act<br>eri<br>a | p__Fi<br>rmicu<br>tes_A         | c__Clo<br>stridia         | o__Lac<br>hnoSpi<br>rales   | f__Lach<br>nospira<br>ceae    | g__CAG-<br>56        | s__CAG-56<br>unknown_4          |
| MGYG-HGUT-01749:s__An200 unknown_1         | 0.9<br>15<br>17<br>67<br>17 | -<br>0.0<br>28<br>11<br>64<br>63 | 0.9<br>94<br>47<br>94<br>74 | d_<br>_B<br>act<br>eri<br>a | p__Fi<br>rmicu<br>tes_A         | c__Clo<br>stridia         | o__Os<br>cilloSpi<br>rales  | f__Acut<br>alibacte<br>raceae | g__An200             | s__An200<br>unknown_1           |
| MGYG-HGUT-01750:s__Bacteroides_A ilei      | 0.6<br>56<br>39<br>53<br>17 | -<br>0.1<br>25<br>05<br>84<br>73 | 0.9<br>75<br>67<br>17<br>57 | d_<br>_B<br>act<br>eri<br>a | p__B<br>acter<br>oidot<br>a     | c__Ba<br>cteroi<br>dia    | o__Bac<br>teroida<br>les    | f__Bact<br>eroidac<br>eae     | g__Bacter<br>oides_A | s__Bacteroi<br>des_A ilei       |
| MGYG-HGUT-01751:s__Gemmiger unknown_8      | 0.5<br>45<br>20<br>12<br>81 | 0.1<br>68<br>70<br>43<br>9       | 0.9<br>68<br>53<br>20<br>73 | d_<br>_B<br>act<br>eri<br>a | p__Fi<br>rmicu<br>tes_A         | c__Clo<br>stridia         | o__Os<br>cilloSpi<br>rales  | f__Rumi<br>nococca<br>ceae    | g__Gemmi<br>ger      | s__Gemmiger<br>unknown_8        |
| MGYG-HGUT-01753:s__Collinsella unknown_173 | 0.0<br>34<br>38<br>93<br>72 | 0.5<br>70<br>66<br>13<br>44      | 0.7<br>68<br>22<br>58<br>34 | d_<br>_B<br>act<br>eri<br>a | p__A<br>ctino<br>bacte<br>riota | c__Co<br>riobac<br>teriia | o__Cor<br>iobact<br>eriales | f__Cori<br>obacteri<br>aceae  | g__Collins<br>ella   | s__Collinsella<br>unknown_173   |
| MGYG-HGUT-01754:s__CAG-110 unknown_8       | 0.7<br>27<br>57<br>92<br>79 | -<br>0.0<br>93<br>39<br>22<br>11 | 0.9<br>79<br>45<br>84<br>75 | d_<br>_B<br>act<br>eri<br>a | p__Fi<br>rmicu<br>tes_A         | c__Clo<br>stridia         | o__Os<br>cilloSpi<br>rales  | f__Oscil<br>lospirac<br>eae   | g__CAG-<br>110       | s__CAG-110<br>unknown_8         |
| MGYG-HGUT-01755:s__CAG-245 unknown_3       | 0.3<br>29<br>86<br>24<br>39 | -<br>0.2<br>72<br>02<br>03<br>84 | 0.9<br>30<br>62<br>46<br>92 | d_<br>_B<br>act<br>eri<br>a | p__Fi<br>rmicu<br>tes_A         | c__Clo<br>stridia         | o__TA<br>NB77               | f__CAG-<br>508                | g__CAG-<br>245       | s__CAG-245<br>unknown_3         |

|                                              |             |              |             |             |                    |                |                    |                    |                  |                              |
|----------------------------------------------|-------------|--------------|-------------|-------------|--------------------|----------------|--------------------|--------------------|------------------|------------------------------|
| MGYG-HGUT-01757:s__Ruminococcus unknown_3    | 0.658597    | -0.1218864   | 0.975671757 | d__Bacteria | p__Firmicutes_A    | c__Clostridia  | o__Oscillospirales | f__Ruminococcales  | g__Ruminococcus  | s__Ruminococcus unknown_3    |
| MGYG-HGUT-01758:s__Blautia_A unknown_13      | 0.931269361 | 0.023650109  | 0.994479474 | d__Bacteria | p__Firmicutes_A    | c__Clostridia  | o__Lachnospirales  | f__Lachnospiraceae | g__Blautia_A     | s__Blautia_A unknown_13      |
| MGYG-HGUT-01761:s__Gemmiger unknown_9        | 0.749153443 | -0.088625479 | 0.979458475 | d__Bacteria | p__Firmicutes_A    | c__Clostridia  | o__Oscillospirales | f__Ruminococcales  | g__Gemmiger      | s__Gemmiger unknown_9        |
| MGYG-HGUT-01763:s__Prevotella sp000434975    | 0.952692257 | -0.01646882  | 0.994479474 | d__Bacteria | p__Bacteroidetes_A | c__Bacteroidia | o__Bacteroidales   | f__Bacteroidaceae  | g__Prevotella    | s__Prevotella sp000434975    |
| MGYG-HGUT-01770:s__Prevotella sp900313215    | 0.969939267 | 0.009472493  | 0.994479474 | d__Bacteria | p__Bacteroidetes_A | c__Bacteroidia | o__Bacteroidales   | f__Bacteroidaceae  | g__Prevotella    | s__Prevotella sp900313215    |
| MGYG-HGUT-01777:s__Eubacterium_F sp000434115 | 0.675742924 | -0.115972252 | 0.975671757 | d__Bacteria | p__Firmicutes_A    | c__Clostridia  | o__Lachnospirales  | f__Lachnospiraceae | g__Eubacterium_F | s__Eubacterium_F sp000434115 |
| MGYG-HGUT-01780:s__Bacteroides unknown_2     | 0.465329776 | 0.203676431  | 0.968030376 | d__Bacteria | p__Bacteroidetes_A | c__Bacteroidia | o__Bacteroidales   | f__Bacteroidaceae  | g__Bacteroides   | s__Bacteroides unknown_2     |
| MGYG-HGUT-01787:s__Bacteroides_A unknown_6   | 0.668127142 | 0.120421549  | 0.975671757 | d__Bacteria | p__Bacteroidetes_A | c__Bacteroidia | o__Bacteroidales   | f__Bacteroidaceae  | g__Bacteroides_A | s__Bacteroides_A unknown_6   |
| MGYG-HGUT-01789:s__Bacteroides_A sp002161565 | 0.01391     | 0.67868      | 0.76822     | d__Bacteria | p__Bacteroidetes_A | c__Bacteroidia | o__Bacteroidales   | f__Bacteroidaceae  | g__Bacteroides_A | s__Bacteroides_A sp002161565 |

|                                             |                             |                                  |                             |                             |                             |                        |                                     |                                |                     |                             |
|---------------------------------------------|-----------------------------|----------------------------------|-----------------------------|-----------------------------|-----------------------------|------------------------|-------------------------------------|--------------------------------|---------------------|-----------------------------|
|                                             | 03<br>39                    | 89<br>68                         | 58<br>34                    | eri<br>a                    |                             |                        |                                     |                                |                     |                             |
| MGYG-HGUT-01793:s__CAG-632<br>sp002406015   | 0.8<br>75<br>58<br>69<br>82 | 0.0<br>42<br>44<br>26<br>04      | 0.9<br>94<br>47<br>94<br>74 | d_<br>_B<br>act<br>eri<br>a | p__Fi<br>rmicu<br>tes_A     | c__Clo<br>stridia      | o__Lac<br>hnospi<br>rales           | f__Lach<br>nospi<br>rac<br>eae | g__CAG-<br>632      | s__CAG-632<br>sp002406015   |
| MGYG-HGUT-01795:s__K10<br>sp001941205       | 0.3<br>27<br>99<br>24<br>87 | 0.2<br>73<br>99<br>78<br>55      | 0.9<br>30<br>62<br>46<br>92 | d_<br>_B<br>act<br>eri<br>a | p__B<br>acter<br>oidot<br>a | c__Ba<br>cteroi<br>dia | o__Bac<br>teroida<br>les            | f__Muri<br>baculac<br>eae      | g__K10              | s__K10<br>sp001941205       |
| MGYG-HGUT-01797:s__CAG-590<br>unknown_3     | 0.1<br>56<br>23<br>83<br>48 | 0.3<br>78<br>79<br>57<br>14      | 0.8<br>91<br>82<br>55<br>59 | d_<br>_B<br>act<br>eri<br>a | p__Fi<br>rmicu<br>tes_A     | c__Clo<br>stridia      | o__Lac<br>hnospi<br>rales           | f__Lach<br>nospi<br>rac<br>eae | g__CAG-<br>590      | s__CAG-590<br>unknown_3     |
| MGYG-HGUT-01806:s__Prevotella<br>unknown_19 | 0.4<br>95<br>43<br>52<br>44 | -<br>0.1<br>91<br>36<br>17<br>05 | 0.9<br>68<br>53<br>20<br>73 | d_<br>_B<br>act<br>eri<br>a | p__B<br>acter<br>oidot<br>a | c__Ba<br>cteroi<br>dia | o__Bac<br>teroida<br>les            | f__Bact<br>eroidac<br>eae      | g__Prevot<br>ella   | s__Prevotella<br>unknown_19 |
| MGYG-HGUT-01807:s__Bacteroides<br>unknown_3 | 0.5<br>13<br>83<br>02<br>99 | 0.1<br>82<br>73<br>61<br>16      | 0.9<br>68<br>53<br>20<br>73 | d_<br>_B<br>act<br>eri<br>a | p__B<br>acter<br>oidot<br>a | c__Ba<br>cteroi<br>dia | o__Bac<br>teroida<br>les            | f__Bact<br>eroidac<br>eae      | g__Bacter<br>oides  | s__Bacteroides<br>unknown_3 |
| MGYG-HGUT-01811:s__UBA117<br>74 unknown     | 0.3<br>29<br>01<br>15<br>25 | -<br>0.2<br>70<br>65<br>58<br>99 | 0.9<br>30<br>62<br>46<br>92 | d_<br>_B<br>act<br>eri<br>a | p__Fi<br>rmicu<br>tes_A     | c__Clo<br>stridia      | o__Lac<br>hnospi<br>rales           | f__Lach<br>nospi<br>rac<br>eae | g__UBA11<br>774     | s__UBA11774<br>unknown      |
| MGYG-HGUT-01814:s__COE1<br>unknown          | 0.0<br>80<br>77<br>08<br>18 | 0.4<br>83<br>92<br>92<br>16      | 0.8<br>77<br>82<br>62<br>47 | d_<br>_B<br>act<br>eri<br>a | p__Fi<br>rmicu<br>tes_A     | c__Clo<br>stridia      | o__Lac<br>hnospi<br>rales           | f__Lach<br>nospi<br>rac<br>eae | g__COE1             | s__COE1<br>unknown          |
| MGYG-HGUT-01819:s__CAG-145<br>unknown_5     | 0.3<br>04<br>08<br>09<br>18 | -<br>0.2<br>87<br>10<br>19<br>98 | 0.9<br>29<br>02<br>59<br>13 | d_<br>_B<br>act<br>eri<br>a | p__Fi<br>rmicu<br>tes_A     | c__Clo<br>stridia      | o__Pe<br>ptostre<br>ptococ<br>cales | f__Anae<br>rorovac<br>eae      | g__CAG-<br>145      | s__CAG-145<br>unknown_5     |
| MGYG-HGUT-01820:s__Anaeroti<br>num          | 0.0<br>65<br>23             | -<br>0.4<br>90                   | 0.8<br>57<br>21             | d_<br>_B<br>act             | p__Fi<br>rmicu<br>tes_A     | c__Clo<br>stridia      | o__Lac<br>hnospi<br>rales           | f__Anae<br>rotignac<br>eae     | g__Anaero<br>tignum | s__Anaerotig<br>num         |

|                                                   |                             |                                  |                             |                             |                             |                        |                                   |                             |                          |                                   |                   |
|---------------------------------------------------|-----------------------------|----------------------------------|-----------------------------|-----------------------------|-----------------------------|------------------------|-----------------------------------|-----------------------------|--------------------------|-----------------------------------|-------------------|
| gnum<br>lactatifermentans                         | 82<br>43                    | 46<br>52<br>31                   | 13<br>2                     | eri<br>a                    |                             |                        |                                   |                             |                          |                                   | lactatifermentans |
| MGYG-HGUT-01823:s__CAG-74<br>unknown<br>unknown_9 | 0.5<br>12<br>18<br>31<br>61 | -<br>0.1<br>80<br>80<br>33<br>15 | 0.9<br>68<br>53<br>20<br>73 | d_<br>_B<br>act<br>eri<br>a | p__Fi<br>rmicu<br>tes_A     | c__Clo<br>stridia      | o__Chr<br>istense<br>nellale<br>s | f__CAG-<br>74               | g__CAG-<br>74<br>unknown | s__CAG-74<br>unknown<br>unknown_9 |                   |
| MGYG-HGUT-01824:s__CAG-83<br>unknown_5            | 0.3<br>84<br>68<br>12<br>9  | 0.2<br>32<br>49<br>40<br>79      | 0.9<br>39<br>70<br>92<br>5  | d_<br>_B<br>act<br>eri<br>a | p__Fi<br>rmicu<br>tes_A     | c__Clo<br>stridia      | o__Os<br>cillospi<br>rales        | f__Oscil<br>lospirac<br>eae | g__CAG-<br>83            | s__CAG-83<br>unknown_5            |                   |
| MGYG-HGUT-01825:s__CAG-269<br>unknown_16          | 0.0<br>91<br>93<br>48<br>14 | 0.4<br>68<br>94<br>86<br>51      | 0.8<br>83<br>30<br>72<br>56 | d_<br>_B<br>act<br>eri<br>a | p__Fi<br>rmicu<br>tes_A     | c__Clo<br>stridia      | o__TA<br>NB77                     | f__CAG-<br>508              | g__CAG-<br>269           | s__CAG-269<br>unknown_16          |                   |
| MGYG-HGUT-01830:s__Alistipes<br>finegoldii        | 0.4<br>78<br>89<br>98<br>98 | -<br>0.1<br>83<br>41<br>10<br>3  | 0.9<br>68<br>53<br>20<br>73 | d_<br>_B<br>act<br>eri<br>a | p__B<br>acter<br>oidot<br>a | c__Ba<br>cteroi<br>dia | o__Bac<br>teroida<br>les          | f__Rike<br>nellacea<br>e    | g__Alistipe<br>s         | s__Alistipes<br>finegoldii        |                   |
| MGYG-HGUT-01831:s__TF01-11<br>sp000436755         | 0.8<br>23<br>08<br>15<br>6  | 0.0<br>62<br>78<br>47<br>85      | 0.9<br>91<br>13<br>66<br>22 | d_<br>_B<br>act<br>eri<br>a | p__Fi<br>rmicu<br>tes_A     | c__Clo<br>stridia      | o__Lac<br>hnospi<br>rales         | f__Lach<br>nospi<br>rales   | g__TF01-<br>11           | s__TF01-11<br>sp000436755         |                   |
| MGYG-HGUT-01835:s__Bacteroides_A<br>sp000432735   | 0.5<br>45<br>99<br>71<br>15 | 0.1<br>67<br>83<br>84<br>35      | 0.9<br>68<br>53<br>20<br>73 | d_<br>_B<br>act<br>eri<br>a | p__B<br>acter<br>oidot<br>a | c__Ba<br>cteroi<br>dia | o__Bac<br>teroida<br>les          | f__Bact<br>eroidac<br>eae   | g__Bacter<br>oides_A     | s__Bacteroides_A<br>sp000432735   |                   |
| MGYG-HGUT-01841:s__CAG-170<br>unknown_5           | 0.2<br>24<br>57<br>83<br>44 | 0.3<br>30<br>27<br>51<br>52      | 0.8<br>91<br>82<br>55<br>59 | d_<br>_B<br>act<br>eri<br>a | p__Fi<br>rmicu<br>tes_A     | c__Clo<br>stridia      | o__Os<br>cillospi<br>rales        | f__Oscil<br>lospirac<br>eae | g__CAG-<br>170           | s__CAG-170<br>unknown_5           |                   |
| MGYG-HGUT-01848:s__Eubacterium_F<br>sp000433735   | 0.7<br>94<br>35<br>02<br>03 | -<br>0.0<br>73<br>10<br>17<br>21 | 0.9<br>82<br>96<br>63       | d_<br>_B<br>act<br>eri<br>a | p__Fi<br>rmicu<br>tes_A     | c__Clo<br>stridia      | o__Lac<br>hnospi<br>rales         | f__Lach<br>nospi<br>rales   | g__Eubact<br>erium_F     | s__Eubacterium_F<br>sp000433735   |                   |



|                                                    |                             |                                   |                             |                             |                                          |                                     |                                        |                                         |                                    |                                               |
|----------------------------------------------------|-----------------------------|-----------------------------------|-----------------------------|-----------------------------|------------------------------------------|-------------------------------------|----------------------------------------|-----------------------------------------|------------------------------------|-----------------------------------------------|
| MGYG-HGUT-01850:s__QALW01 unknown unknown_2        | 0.9<br>81<br>01<br>78<br>39 | -<br>0.0<br>06<br>68<br>09<br>65  | 0.9<br>97<br>64<br>79<br>14 | d_<br>_B<br>act<br>eri<br>a | p_<br>_Fi<br>rmicu<br>tes_A              | c_<br>_Clo<br>stridia               | o_<br>_Chr<br>istense<br>nellale<br>s  | f_<br>_QAL<br>W01                       | g_<br>_QALW<br>01<br>unknown       | s_<br>_QALW01<br>unknown<br>unknown_2         |
| MGYG-HGUT-01855:s__CAG-632 sp000431515             | 0.6<br>45<br>95<br>95<br>16 | 0.1<br>24<br>86<br>06<br>17<br>24 | 0.9<br>75<br>67<br>17<br>57 | d_<br>_B<br>act<br>eri<br>a | p_<br>_Fi<br>rmicu<br>tes_A              | c_<br>_Clo<br>stridia               | o_<br>_Lac<br>hnospi<br>rales          | f_<br>_Lach<br>nospirac<br>eae          | g_<br>_CAG-<br>632                 | s_<br>_CAG-632<br>sp000431515                 |
| MGYG-HGUT-01866:s__Prevotella sp003447235          | 0.3<br>00<br>51<br>16<br>24 | 0.2<br>76<br>82<br>05<br>48       | 0.9<br>29<br>02<br>59<br>13 | d_<br>_B<br>act<br>eri<br>a | p_<br>_B<br>acter<br>oidot<br>a          | c_<br>_Ba<br>cteroi<br>dia          | o_<br>_Bac<br>teroida<br>les           | f_<br>_Bact<br>eroidac<br>eae           | g_<br>_Prevot<br>ella              | s_<br>_Prevotella<br>sp003447235              |
| MGYG-HGUT-01876:s__Acetatifa ctor unknown_4        | 0.2<br>40<br>81<br>69<br>99 | 0.3<br>20<br>17<br>39<br>66       | 0.9<br>02<br>18<br>13<br>67 | d_<br>_B<br>act<br>eri<br>a | p_<br>_Fi<br>rmicu<br>tes_A              | c_<br>_Clo<br>stridia               | o_<br>_Lac<br>hnospi<br>rales          | f_<br>_Lach<br>nospirac<br>eae          | g_<br>_Acetati<br>factor           | s_<br>_Acetatifa<br>ctor<br>unknown_4         |
| MGYG-HGUT-01878:s__Parabacteroides unknown_7       | 0.3<br>84<br>88<br>93<br>04 | -<br>0.2<br>41<br>72<br>84<br>34  | 0.9<br>39<br>70<br>92<br>5  | d_<br>_B<br>act<br>eri<br>a | p_<br>_B<br>acter<br>oidot<br>a          | c_<br>_Ba<br>cteroi<br>dia          | o_<br>_Bac<br>teroida<br>les           | f_<br>_Tann<br>erellace<br>ae           | g_<br>_Paraba<br>cteroides         | s_<br>_Parabacte<br>roides<br>unknown_7       |
| MGYG-HGUT-01881:s__Akkermansia muciniphila_A       | 0.5<br>57<br>34<br>18<br>25 | -<br>0.1<br>55<br>11<br>47<br>85  | 0.9<br>68<br>53<br>20<br>73 | d_<br>_B<br>act<br>eri<br>a | p_<br>_V<br>erruc<br>omicr<br>obiot<br>a | c_<br>_Ve<br>rruco<br>micro<br>biae | o_<br>_Ver<br>rucomi<br>crobial<br>es  | f_<br>_Akke<br>rmansia<br>ceae          | g_<br>_Akker<br>mansia             | s_<br>_Akkerman<br>sia<br>muciniphila_<br>A   |
| MGYG-HGUT-01887:s__Ruminiclostridium_E sp003512525 | 0.5<br>16<br>14<br>88<br>08 | 0.1<br>76<br>29<br>70<br>88       | 0.9<br>68<br>53<br>20<br>73 | d_<br>_B<br>act<br>eri<br>a | p_<br>_Fi<br>rmicu<br>tes_A              | c_<br>_Clo<br>stridia               | o_<br>_Os<br>cillospi<br>rales         | f_<br>_Rumi<br>nococca<br>ceae          | g_<br>_Rumini<br>clostridiu<br>m_E | s_<br>_Ruminiclo<br>stridium_E<br>sp003512525 |
| MGYG-HGUT-01899:s__Zag1 unknown_8                  | 0.8<br>51<br>35<br>93<br>44 | -<br>0.0<br>50<br>81<br>49<br>41  | 0.9<br>92<br>87<br>80<br>88 | d_<br>_B<br>act<br>eri<br>a | p_<br>_C<br>yano<br>bacte<br>ria         | c_<br>_Va<br>mpiro<br>vibrio<br>nia | o_<br>_Ga<br>strana<br>erophil<br>ales | f_<br>_Gast<br>ranaero<br>philacea<br>e | g_<br>_Zag1                        | s_<br>_Zag1<br>unknown_8                      |
| MGYG-HGUT-01906:s__CAG-484 unknown_2               | 0.6<br>96<br>89             | 0.1<br>09<br>50                   | 0.9<br>79<br>45             | d_<br>_B<br>act             | p_<br>_C<br>yano<br>bacte<br>ria         | c_<br>_Va<br>mpiro<br>vibrio<br>nia | o_<br>_Ga<br>strana<br>erophil<br>ales | f_<br>_Gast<br>ranaero<br>philacea<br>e | g_<br>_CAG-<br>484                 | s_<br>_CAG-484<br>unknown_2                   |

|                                                 |                             |                                  |                             |                             |                                      |                                 |                                   |                             |                               |                                        |
|-------------------------------------------------|-----------------------------|----------------------------------|-----------------------------|-----------------------------|--------------------------------------|---------------------------------|-----------------------------------|-----------------------------|-------------------------------|----------------------------------------|
|                                                 | 40<br>98                    | 76<br>92                         | 84<br>75                    | eri<br>a                    |                                      |                                 |                                   |                             |                               |                                        |
| MGYG-HGUT-01908:s__Ruminococcus_D unknown_3     | 0.5<br>09<br>15<br>67<br>02 | -<br>0.1<br>82<br>18<br>80<br>76 | 0.9<br>68<br>53<br>20<br>73 | d_<br>_B<br>act<br>eri<br>a | p__Fi<br>rmicu<br>tes_A              | c__Clo<br>stridia               | o__Os<br>cillospi<br>rales        | f__Rumi<br>nococca<br>ceae  | g__Rumin<br>ococcus_D         | s__Ruminoco<br>ccus_D<br>unknown_3     |
| MGYG-HGUT-01918:s__Prevotellamassilia unknown_6 | 0.2<br>42<br>06<br>60<br>23 | 0.3<br>25<br>65<br>23<br>41      | 0.9<br>02<br>18<br>13<br>67 | d_<br>_B<br>act<br>eri<br>a | p__B<br>acter<br>oidot<br>a          | c__Ba<br>cteroi<br>dia          | o__Bac<br>teroida<br>les          | f__Bact<br>eroidac<br>eae   | g__Prevot<br>ellamassili<br>a | s__Prevotella<br>massilia<br>unknown_6 |
| MGYG-HGUT-01919:s__F23-B02 sp002472405          | 0.5<br>70<br>03<br>53<br>27 | 0.1<br>55<br>57<br>87<br>22      | 0.9<br>73<br>85<br>57<br>64 | d_<br>_B<br>act<br>eri<br>a | p__Fi<br>rmicu<br>tes_A              | c__Clo<br>stridia               | o__Os<br>cillospi<br>rales        | f__Oscil<br>lospirac<br>eae | g__F23-<br>B02                | s__F23-B02<br>sp002472405              |
| MGYG-HGUT-01920:s__Bacteroides_A unknown_7      | 0.5<br>53<br>51<br>22<br>29 | -<br>0.1<br>64<br>42<br>41<br>46 | 0.9<br>68<br>53<br>20<br>73 | d_<br>_B<br>act<br>eri<br>a | p__B<br>acter<br>oidot<br>a          | c__Ba<br>cteroi<br>dia          | o__Bac<br>teroida<br>les          | f__Bact<br>eroidac<br>eae   | g__Bacter<br>oides_A          | s__Bacteroides<br>_A<br>unknown_7      |
| MGYG-HGUT-01921:s__Akkermansia unknown_2        | 0.8<br>60<br>66<br>48<br>82 | -<br>0.0<br>46<br>84<br>04<br>55 | 0.9<br>93<br>54<br>53<br>13 | d_<br>_B<br>act<br>eri<br>a | p__V<br>erruc<br>omicr<br>obiot<br>a | c__Ve<br>rruco<br>micro<br>biae | o__Ver<br>rucomi<br>crobial<br>es | f__Akke<br>rmansia<br>ceae  | g__Akker<br>mansia            | s__Akkerman<br>sia<br>unknown_2        |
| MGYG-HGUT-01925:s__Bacteroides_A unknown_8      | 0.5<br>81<br>56<br>25<br>66 | 0.1<br>54<br>75<br>54<br>46      | 0.9<br>75<br>67<br>17<br>57 | d_<br>_B<br>act<br>eri<br>a | p__B<br>acter<br>oidot<br>a          | c__Ba<br>cteroi<br>dia          | o__Bac<br>teroida<br>les          | f__Bact<br>eroidac<br>eae   | g__Bacter<br>oides_A          | s__Bacteroides<br>_A<br>unknown_8      |
| MGYG-HGUT-01927:s__Prevotella unknown_21        | 0.6<br>79<br>86<br>79<br>82 | -<br>0.1<br>13<br>59<br>17<br>62 | 0.9<br>75<br>67<br>17<br>57 | d_<br>_B<br>act<br>eri<br>a | p__B<br>acter<br>oidot<br>a          | c__Ba<br>cteroi<br>dia          | o__Bac<br>teroida<br>les          | f__Bact<br>eroidac<br>eae   | g__Prevot<br>ella             | s__Prevotella<br>unknown_21            |
| MGYG-HGUT-01929:s__Paramuribaculum unknown_4    | 0.6<br>67<br>19<br>10<br>21 | 0.1<br>20<br>77<br>52<br>23      | 0.9<br>75<br>67<br>17<br>57 | d_<br>_B<br>act<br>eri<br>a | p__B<br>acter<br>oidot<br>a          | c__Ba<br>cteroi<br>dia          | o__Bac<br>teroida<br>les          | f__Muri<br>baculac<br>eae   | g__Param<br>uribaculu<br>m    | s__Paramurib<br>aculum<br>unknown_4    |

|                                             |                             |                                  |                             |                             |                              |                                 |                                    |                                     |                          |                                    |
|---------------------------------------------|-----------------------------|----------------------------------|-----------------------------|-----------------------------|------------------------------|---------------------------------|------------------------------------|-------------------------------------|--------------------------|------------------------------------|
| MGYG-HGUT-01931:s__CAG-279 unknown_3        | 0.3<br>70<br>83<br>85<br>69 | 0.2<br>42<br>99<br>80<br>44      | 0.9<br>39<br>70<br>92<br>5  | d_<br>_B<br>act<br>eri<br>a | p__B<br>acter<br>oidot<br>a  | c__Ba<br>cteroi<br>dia          | o__Bac<br>teroida<br>les           | f__Muri<br>baculac<br>eae           | g__CAG-<br>279           | s__CAG-279<br>unknown_3            |
| MGYG-HGUT-01932:s__QAND01 unknown unknown_1 | 0.6<br>37<br>93<br>38<br>61 | 0.1<br>27<br>50<br>02<br>88      | 0.9<br>75<br>67<br>17<br>57 | d_<br>_B<br>act<br>eri<br>a | p__Fi<br>rmicu<br>tes_A      | c__Clo<br>stridia               | o__Chr<br>istense<br>nellale<br>s  | f__QAN<br>D01                       | g__QAND0<br>1<br>unknown | s__QAND01<br>unknown<br>unknown_1  |
| MGYG-HGUT-01933:s__Prevotella unknown_22    | 0.6<br>09<br>01<br>69<br>36 | 0.1<br>35<br>88<br>27<br>51      | 0.9<br>75<br>67<br>17<br>57 | d_<br>_B<br>act<br>eri<br>a | p__B<br>acter<br>oidot<br>a  | c__Ba<br>cteroi<br>dia          | o__Bac<br>teroida<br>les           | f__Bact<br>eroidac<br>eae           | g__Prevot<br>ella        | s__Prevotella<br>unknown_22        |
| MGYG-HGUT-01936:s__UBA5905 sp002437905      | 0.8<br>79<br>35<br>63<br>91 | 0.0<br>42<br>03<br>02<br>78      | 0.9<br>94<br>47<br>94<br>74 | d_<br>_B<br>act<br>eri<br>a | p__Fi<br>rmicu<br>tes_A      | c__Clo<br>stridia               | o__Os<br>cillospi<br>rales         | f__Acut<br>alibacte<br>raceae       | g__UBA59<br>05           | s__UBA5905<br>sp002437905          |
| MGYG-HGUT-01940:s__Ruminococcus sp002438605 | 0.5<br>65<br>88<br>01<br>31 | 0.1<br>55<br>12<br>50<br>23      | 0.9<br>71<br>33<br>90<br>3  | d_<br>_B<br>act<br>eri<br>a | p__Fi<br>rmicu<br>tes_A      | c__Clo<br>stridia               | o__Os<br>cillospi<br>rales         | f__Rumi<br>nococca<br>ceae          | g__Rumin<br>ococcus      | s__Ruminoco<br>ccus<br>sp002438605 |
| MGYG-HGUT-01942:s__CAG-269 unknown_17       | 0.9<br>95<br>80<br>57<br>44 | 0.0<br>01<br>45<br>86<br>35      | 0.9<br>98<br>80<br>33<br>46 | d_<br>_B<br>act<br>eri<br>a | p__Fi<br>rmicu<br>tes_A      | c__Clo<br>stridia               | o__TA<br>NB77                      | f__CAG-<br>508                      | g__CAG-<br>269           | s__CAG-269<br>unknown_17           |
| MGYG-HGUT-01943:s__CAG-484 unknown_3        | 0.7<br>24<br>88<br>70<br>36 | -<br>0.0<br>90<br>93<br>13<br>26 | 0.9<br>79<br>45<br>84<br>75 | d_<br>_B<br>act<br>eri<br>a | p__C<br>yano<br>bacte<br>ria | c__Va<br>mpiro<br>vibrio<br>nia | o__Ga<br>strana<br>erophil<br>ales | f__Gast<br>ranaero<br>philacea<br>e | g__CAG-<br>484           | s__CAG-484<br>unknown_3            |
| MGYG-HGUT-01947:s__UBA1777 unknown_6        | 0.3<br>48<br>76<br>24<br>54 | 0.2<br>55<br>02<br>20<br>73      | 0.9<br>39<br>70<br>92<br>5  | d_<br>_B<br>act<br>eri<br>a | p__Fi<br>rmicu<br>tes_A      | c__Clo<br>stridia               | o__Os<br>cillospi<br>rales         | f__Oscil<br>lospirac<br>eae         | g__UBA17<br>77           | s__UBA1777<br>unknown_6            |
| MGYG-HGUT-01949:s__Oscillibacter unknown_11 | 0.0<br>43<br>33<br>11<br>39 | 0.5<br>52<br>00<br>54<br>38      | 0.7<br>79<br>32<br>10<br>52 | d_<br>_B<br>act<br>eri<br>a | p__Fi<br>rmicu<br>tes_A      | c__Clo<br>stridia               | o__Os<br>cillospi<br>rales         | f__Oscil<br>lospirac<br>eae         | g__Oscilib<br>acter      | s__Oscillibact<br>er<br>unknown_11 |

|                                                         |                             |                                  |                             |                             |                              |                                 |                                    |                                     |                              |                                                    |
|---------------------------------------------------------|-----------------------------|----------------------------------|-----------------------------|-----------------------------|------------------------------|---------------------------------|------------------------------------|-------------------------------------|------------------------------|----------------------------------------------------|
| MGYG-HGUT-01950:s__Gastranaerophilus phascolarctosicola | 0.3<br>64<br>13<br>96<br>61 | -<br>0.2<br>47<br>18<br>28<br>41 | 0.9<br>39<br>70<br>92<br>5  | d_<br>_B<br>act<br>eri<br>a | p__C<br>yano<br>bacte<br>ria | c__Va<br>mpiro<br>vibrio<br>nia | o__Ga<br>strana<br>erophil<br>ales | f__Gast<br>ranaero<br>philacea<br>e | g__Gastr<br>anaerophilu<br>s | s__Gastranae<br>rophilus<br>phascolarctos<br>icola |
| MGYG-HGUT-01954:s__Clostridium_M unknown_10             | 0.4<br>21<br>18<br>80<br>68 | 0.2<br>24<br>36<br>67<br>87      | 0.9<br>42<br>00<br>63<br>55 | d_<br>_B<br>act<br>eri<br>a | p__Fi<br>rmicu<br>tes_A      | c__Clo<br>stridia               | o__Lac<br>hnospi<br>rales          | f__Lach<br>nospirac<br>eae          | g__Clostri<br>dium_M         | s__Clostridiu<br>m_M<br>unknown_10                 |
| MGYG-HGUT-01963:s__Bacteroides_A sp000434735            | 0.9<br>27<br>84<br>23<br>85 | -<br>0.0<br>25<br>09<br>06       | 0.9<br>94<br>47<br>94<br>74 | d_<br>_B<br>act<br>eri<br>a | p__B<br>acter<br>oidot<br>a  | c__Ba<br>cteroi<br>dia          | o__Bac<br>teroida<br>les           | f__Bact<br>eroidac<br>eae           | g__Bacter<br>oides_A         | s__Bacteroides<br>_A<br>sp000434735                |
| MGYG-HGUT-01964:s__Acetatifa ctor unknown_5             | 0.0<br>36<br>84<br>96<br>34 | 0.5<br>62<br>72<br>00<br>58      | 0.7<br>68<br>22<br>58<br>34 | d_<br>_B<br>act<br>eri<br>a | p__Fi<br>rmicu<br>tes_A      | c__Clo<br>stridia               | o__Lac<br>hnospi<br>rales          | f__Lach<br>nospirac<br>eae          | g__Acetati<br>factor         | s__Acetatifa<br>ctor<br>unknown_5                  |
| MGYG-HGUT-01965:s__CAG-510 unknown_1                    | 0.8<br>84<br>17<br>56<br>99 | 0.0<br>40<br>45<br>73<br>02      | 0.9<br>94<br>47<br>94<br>74 | d_<br>_B<br>act<br>eri<br>a | p__Fi<br>rmicu<br>tes_A      | c__Clo<br>stridia               | o__Lac<br>hnospi<br>rales          | f__Lach<br>nospirac<br>eae          | g__CAG-<br>510               | s__CAG-510<br>unknown_1                            |
| MGYG-HGUT-01969:s__CAG-110 unknown_9                    | 0.9<br>62<br>65<br>18<br>93 | -<br>0.0<br>12<br>95<br>80<br>35 | 0.9<br>94<br>47<br>94<br>74 | d_<br>_B<br>act<br>eri<br>a | p__Fi<br>rmicu<br>tes_A      | c__Clo<br>stridia               | o__Os<br>cillospi<br>rales         | f__Oscil<br>lospirac<br>eae         | g__CAG-<br>110               | s__CAG-110<br>unknown_9                            |
| MGYG-HGUT-01971:s__Clostridium_M unknown_11             | 0.2<br>18<br>77<br>69<br>02 | 0.3<br>38<br>56<br>50<br>02      | 0.8<br>91<br>82<br>55<br>59 | d_<br>_B<br>act<br>eri<br>a | p__Fi<br>rmicu<br>tes_A      | c__Clo<br>stridia               | o__Lac<br>hnospi<br>rales          | f__Lach<br>nospirac<br>eae          | g__Clostri<br>dium_M         | s__Clostridiu<br>m_M<br>unknown_11                 |
| MGYG-HGUT-01972:s__Prevotella sp900315955               | 0.6<br>75<br>11<br>06<br>05 | 0.1<br>08<br>13<br>11<br>4       | 0.9<br>75<br>67<br>17<br>57 | d_<br>_B<br>act<br>eri<br>a | p__B<br>acter<br>oidot<br>a  | c__Ba<br>cteroi<br>dia          | o__Bac<br>teroida<br>les           | f__Bact<br>eroidac<br>eae           | g__Prevot<br>ella            | s__Prevotella<br>sp900315955                       |
| MGYG-HGUT-01975:s__Prevotella unknown_23                | 0.5<br>33<br>43<br>19<br>81 | -<br>0.1<br>69<br>61<br>19<br>73 | 0.9<br>68<br>53<br>20<br>73 | d_<br>_B<br>act<br>eri<br>a | p__B<br>acter<br>oidot<br>a  | c__Ba<br>cteroi<br>dia          | o__Bac<br>teroida<br>les           | f__Bact<br>eroidac<br>eae           | g__Prevot<br>ella            | s__Prevotella<br>unknown_23                        |

|                                                |                             |                                  |                             |                             |                                 |                           |                             |                              |                                    |                                                |
|------------------------------------------------|-----------------------------|----------------------------------|-----------------------------|-----------------------------|---------------------------------|---------------------------|-----------------------------|------------------------------|------------------------------------|------------------------------------------------|
| MGYG-HGUT-01977:s__Bacteroides unknown_4       | 0.3<br>37<br>71<br>18<br>12 | -<br>0.2<br>68<br>44<br>09<br>16 | 0.9<br>30<br>62<br>46<br>92 | d_<br>_B<br>act<br>eri<br>a | p__B<br>acter<br>oidot<br>a     | c__Ba<br>cteroi<br>dia    | o__Bac<br>teroida<br>les    | f__Bact<br>eroidac<br>eae    | g__Bacter<br>oides                 | s__Bacteroides<br>unknown_4                    |
| MGYG-HGUT-01982:s__Collinsella unknown_181     | 0.5<br>02<br>14<br>22<br>37 | 0.1<br>85<br>69<br>40<br>15      | 0.9<br>68<br>53<br>20<br>73 | d_<br>_B<br>act<br>eri<br>a | p__A<br>ctino<br>bacte<br>riota | c__Co<br>riobac<br>teriia | o__Cor<br>iobact<br>eriales | f__Cori<br>obacteri<br>aceae | g__Collins<br>ella                 | s__Collinsella<br>unknown_181                  |
| MGYG-HGUT-01983:s__Oscillibacter sp000436875   | 0.2<br>15<br>23<br>42<br>8  | -<br>0.3<br>20<br>82<br>04<br>28 | 0.8<br>91<br>82<br>55<br>59 | d_<br>_B<br>act<br>eri<br>a | p__Fi<br>rmicu<br>tes_A         | c__Clo<br>stridia         | o__Os<br>cillospi<br>rales  | f__Oscil<br>lospirac<br>eae  | g__Oscillib<br>acter               | s__Oscillibacter<br>sp000436875                |
| MGYG-HGUT-01986:s__Collinsella aerofaciens_F_6 | 0.1<br>70<br>07<br>79<br>06 | 0.3<br>73<br>45<br>99<br>88      | 0.8<br>91<br>82<br>55<br>59 | d_<br>_B<br>act<br>eri<br>a | p__A<br>ctino<br>bacte<br>riota | c__Co<br>riobac<br>teriia | o__Cor<br>iobact<br>eriales | f__Cori<br>obacteri<br>aceae | g__Collins<br>ella                 | s__Collinsella<br>aerofaciens_F_6              |
| MGYG-HGUT-01987:s__Ruminococcaceae unknown_9   | 0.5<br>83<br>58<br>59<br>57 | -<br>0.1<br>52<br>24<br>31       | 0.9<br>75<br>67<br>17<br>57 | d_<br>_B<br>act<br>eri<br>a | p__Fi<br>rmicu<br>tes_A         | c__Clo<br>stridia         | o__Os<br>cillospi<br>rales  | f__Rumi<br>nococca<br>ceae   | g__Rumin<br>ococcacea<br>e unknown | s__Ruminococ<br>caceae<br>unknown<br>unknown_9 |
| MGYG-HGUT-01988:s__Marvinbryantia unknown_2    | 0.5<br>98<br>36<br>03<br>66 | 0.1<br>43<br>33<br>74<br>82      | 0.9<br>75<br>67<br>17<br>57 | d_<br>_B<br>act<br>eri<br>a | p__Fi<br>rmicu<br>tes_A         | c__Clo<br>stridia         | o__Lac<br>hnospi<br>rales   | f__Lach<br>nospirac<br>eae   | g__Marvin<br>bryantia              | s__Marvinbry<br>antia<br>unknown_2             |
| MGYG-HGUT-01993:s__Collinsella unknown_183     | 0.4<br>81<br>17<br>01<br>01 | 0.1<br>94<br>93<br>77<br>35      | 0.9<br>68<br>53<br>20<br>73 | d_<br>_B<br>act<br>eri<br>a | p__A<br>ctino<br>bacte<br>riota | c__Co<br>riobac<br>teriia | o__Cor<br>iobact<br>eriales | f__Cori<br>obacteri<br>aceae | g__Collins<br>ella                 | s__Collinsella<br>unknown_183                  |
| MGYG-HGUT-01994:s__Faecalibacterium unknown_4  | 0.2<br>56<br>76<br>20<br>21 | 0.3<br>14<br>64<br>95<br>72      | 0.9<br>05<br>66<br>66<br>14 | d_<br>_B<br>act<br>eri<br>a | p__Fi<br>rmicu<br>tes_A         | c__Clo<br>stridia         | o__Lac<br>hnospi<br>rales   | f__Lach<br>nospirac<br>eae   | g__Faecali<br>catena               | s__Faecalicat<br>ena<br>unknown_4              |
| MGYG-HGUT-01995:s__Parabacteroides unknown_9   | 0.5<br>11<br>93<br>43<br>69 | -<br>0.1<br>80<br>12<br>89<br>88 | 0.9<br>68<br>53<br>20<br>73 | d_<br>_B<br>act<br>eri<br>a | p__B<br>acter<br>oidot<br>a     | c__Ba<br>cteroi<br>dia    | o__Bac<br>teroida<br>les    | f__Tann<br>erellace<br>ae    | g__Paraba<br>cteroides             | s__Parabacte<br>roides<br>unknown_9            |

|                                            |             |              |             |             |                   |                    |                         |                       |                  |                            |
|--------------------------------------------|-------------|--------------|-------------|-------------|-------------------|--------------------|-------------------------|-----------------------|------------------|----------------------------|
| MGYG-HGUT-01996:s__Collinsella unknown_184 | 0.80870912  | 0.06671167   | 0.987142302 | d__Bacteria | p__Actinobacteria | c__Corynebacteriia | o__Corynebacteriales    | f__Corynebacteriaceae | g__Collinsella   | s__Collinsella unknown_184 |
| MGYG-HGUT-01997:s__Collinsella unknown_185 | 0.104295971 | 0.432280077  | 0.883307256 | d__Bacteria | p__Actinobacteria | c__Corynebacteriia | o__Corynebacteriales    | f__Corynebacteriaceae | g__Collinsella   | s__Collinsella unknown_185 |
| MGYG-HGUT-01998:s__Lachnospira unknown_2   | 0.201527833 | 0.353486086  | 0.891825559 | d__Bacteria | p__Firmicutes_A   | c__Clostridia      | o__Lachnospirales       | f__Lachnospiraceae    | g__Lachnospira   | s__Lachnospira unknown_2   |
| MGYG-HGUT-01999:s__Collinsella unknown_186 | 0.409805368 | 0.220945853  | 0.93970925  | d__Bacteria | p__Actinobacteria | c__Corynebacteriia | o__Corynebacteriales    | f__Corynebacteriaceae | g__Collinsella   | s__Collinsella unknown_186 |
| MGYG-HGUT-02001:s__CAG-177 sp000431775     | 0.254591554 | 0.317256567  | 0.905015696 | d__Bacteria | p__Firmicutes_A   | c__Clostridia      | o__Oscillospirales      | f__Acutalibacteraceae | g__CAG-177       | s__CAG-177 sp000431775     |
| MGYG-HGUT-02006:s__Lawsonibacter unknown_5 | 0.571512826 | -0.149746211 | 0.974686221 | d__Bacteria | p__Firmicutes_A   | c__Clostridia      | o__Oscillospirales      | f__Oscillospiraceae   | g__Lawsonibacter | s__Lawsonibacter unknown_5 |
| MGYG-HGUT-02007:s__Alistipes unknown_5     | 0.941623931 | 0.02014569   | 0.994479474 | d__Bacteria | p__Bacteroidota   | c__Bacteroidia     | o__Bacteroidales        | f__Rikenellaceae      | g__Alistipes     | s__Alistipes unknown_5     |
| MGYG-HGUT-02012:s__CAG-145 unknown_7       | 0.281084441 | 0.29839861   | 0.929025913 | d__Bacteria | p__Firmicutes_A   | c__Clostridia      | o__Peptostreptococcales | f__Anaerovoracaceae   | g__CAG-145       | s__CAG-145 unknown_7       |
| MGYG-HGUT-02020:s__Collinsella unknown_188 | 0.651714082 | -0.126341749 | 0.975671757 | d__Bacteria | p__Actinobacteria | c__Corynebacteriia | o__Corynebacteriales    | f__Corynebacteriaceae | g__Collinsella   | s__Collinsella unknown_188 |

|                                                       |                             |                                  |                             |                             |                                 |                           |                             |                              |                                    |                                                 |
|-------------------------------------------------------|-----------------------------|----------------------------------|-----------------------------|-----------------------------|---------------------------------|---------------------------|-----------------------------|------------------------------|------------------------------------|-------------------------------------------------|
| MGYG-HGUT-02024:s__CAG-877 unknown_4                  | 0.3<br>54<br>56<br>48<br>81 | -<br>0.2<br>56<br>18<br>91<br>03 | 0.9<br>39<br>70<br>92<br>5  | d_<br>_B<br>act<br>eri<br>a | p__Fi<br>rmicu<br>tes           | c__Ba<br>cilli            | o__RF<br>39                 | f__CAG-<br>611               | g__CAG-<br>877                     | s__CAG-877<br>unknown_4                         |
| MGYG-HGUT-02026:s__Oscillospiraceae unknown unknown_6 | 0.4<br>82<br>40<br>24<br>09 | -<br>0.1<br>92<br>20<br>02<br>69 | 0.9<br>68<br>53<br>20<br>73 | d_<br>_B<br>act<br>eri<br>a | p__Fi<br>rmicu<br>tes_A         | c__Clo<br>stridia         | o__Os<br>cillospi<br>rales  | f__Oscil<br>lospirac<br>eae  | g__Oscillo<br>spiraceae<br>unknown | s__Oscillospir<br>aceae<br>unknown<br>unknown_6 |
| MGYG-HGUT-02028:s__Collinsella unknown_189            | 0.4<br>46<br>80<br>43<br>2  | 0.2<br>05<br>63<br>92<br>71      | 0.9<br>61<br>29<br>22<br>08 | d_<br>_B<br>act<br>eri<br>a | p__A<br>ctino<br>bacte<br>riota | c__Co<br>riobac<br>teriia | o__Cor<br>iobact<br>eriales | f__Cori<br>obacteri<br>aceae | g__Collins<br>ella                 | s__Collinsella<br>unknown_18<br>9               |
| MGYG-HGUT-02029:s__GCA-900066575 unknown_2            | 0.2<br>90<br>64<br>88<br>14 | 0.2<br>93<br>23<br>91<br>86      | 0.9<br>29<br>02<br>59<br>13 | d_<br>_B<br>act<br>eri<br>a | p__Fi<br>rmicu<br>tes_A         | c__Clo<br>stridia         | o__Lac<br>hnospi<br>rales   | f__Lach<br>nospirac<br>eae   | g__GCA-<br>90006657<br>5           | s__GCA-<br>900066575<br>unknown_2               |
| MGYG-HGUT-02032:s__Collinsella unknown_190            | 0.3<br>32<br>67<br>10<br>44 | 0.2<br>66<br>06<br>89<br>01      | 0.9<br>30<br>62<br>46<br>92 | d_<br>_B<br>act<br>eri<br>a | p__A<br>ctino<br>bacte<br>riota | c__Co<br>riobac<br>teriia | o__Cor<br>iobact<br>eriales | f__Cori<br>obacteri<br>aceae | g__Collins<br>ella                 | s__Collinsella<br>unknown_19<br>0               |
| MGYG-HGUT-02033:s__Parabacteroides sp900155425        | 0.9<br>63<br>03<br>56<br>9  | -<br>0.0<br>12<br>86<br>09<br>17 | 0.9<br>94<br>47<br>94<br>74 | d_<br>_B<br>act<br>eri<br>a | p__B<br>acter<br>oidot<br>a     | c__Ba<br>cteroi<br>dia    | o__Bac<br>teroida<br>les    | f__Tann<br>erellace<br>ae    | g__Paraba<br>cteroides             | s__Parabacte<br>roides<br>sp900155425           |
| MGYG-HGUT-02034:s__CAG-170 unknown_6                  | 0.1<br>80<br>23<br>68<br>47 | 0.3<br>53<br>36<br>35<br>99      | 0.8<br>91<br>82<br>55<br>59 | d_<br>_B<br>act<br>eri<br>a | p__Fi<br>rmicu<br>tes_A         | c__Clo<br>stridia         | o__Os<br>cillospi<br>rales  | f__Oscil<br>lospirac<br>eae  | g__CAG-<br>170                     | s__CAG-170<br>unknown_6                         |
| MGYG-HGUT-02037:s__Ruminococcaceae unknown unknown_10 | 0.1<br>99<br>58<br>44<br>97 | 0.3<br>58<br>09<br>17<br>62      | 0.8<br>91<br>82<br>55<br>59 | d_<br>_B<br>act<br>eri<br>a | p__Fi<br>rmicu<br>tes_A         | c__Clo<br>stridia         | o__Os<br>cillospi<br>rales  | f__Rumi<br>nococca<br>ceae   | g__Rumin<br>ococcacea<br>e unknown | s__Ruminoco<br>ccaceae<br>unknown<br>unknown_10 |
| MGYG-HGUT-02040:s__Faecalibacterium unknown_5         | 0.4<br>97<br>51<br>95<br>59 | 0.1<br>88<br>17<br>47<br>85      | 0.9<br>68<br>53<br>20<br>73 | d_<br>_B<br>act<br>eri<br>a | p__Fi<br>rmicu<br>tes_A         | c__Clo<br>stridia         | o__Os<br>cillospi<br>rales  | f__Rumi<br>nococca<br>ceae   | g__Faecali<br>bacterium            | s__Faecalibac<br>terium<br>unknown_5            |

|                                               |             |             |             |             |                   |                    |                      |                       |                             |                               |
|-----------------------------------------------|-------------|-------------|-------------|-------------|-------------------|--------------------|----------------------|-----------------------|-----------------------------|-------------------------------|
| MGYG-HGUT-02043:s__Collinsella unknown_192    | 0.108625219 | 0.439758317 | 0.883307256 | d__Bacteria | p__Actinobacteria | c__Corynebacteriia | o__Corynebacteriales | f__Corynebacteriaceae | g__Collinsella              | s__Collinsella unknown_192    |
| MGYG-HGUT-02045:s__CAG-110 unknown_11         | 0.146396176 | 0.390094054 | 0.891825559 | d__Bacteria | p__Firmicutes_A   | c__Clostridia      | o__Oscillospirales   | f__Oscillospiraceae   | g__CAG-110                  | s__CAG-110 unknown_11         |
| MGYG-HGUT-02048:s__Collinsella sp002232035_24 | 0.301200209 | 0.278140214 | 0.929025913 | d__Bacteria | p__Actinobacteria | c__Corynebacteriia | o__Corynebacteriales | f__Corynebacteriaceae | g__Collinsella              | s__Collinsella sp002232035_24 |
| MGYG-HGUT-02055:s__Collinsella unknown_195    | 0.114470523 | 0.429182603 | 0.883307256 | d__Bacteria | p__Actinobacteria | c__Corynebacteriia | o__Corynebacteriales | f__Corynebacteriaceae | g__Collinsella              | s__Collinsella unknown_195    |
| MGYG-HGUT-02057:s__Oscillibacter sp001916835  | 0.998843763 | 0.000400336 | 0.998843763 | d__Bacteria | p__Firmicutes_A   | c__Clostridia      | o__Oscillospirales   | f__Oscillospiraceae   | g__Oscillibacter            | s__Oscillibacter sp001916835  |
| MGYG-HGUT-02058:s__Collinsella sp002232035_25 | 0.047861122 | 0.546353078 | 0.814550715 | d__Bacteria | p__Actinobacteria | c__Corynebacteriia | o__Corynebacteriales | f__Corynebacteriaceae | g__Collinsella              | s__Collinsella sp002232035_25 |
| MGYG-HGUT-02059:s__Gemmiger unknown_10        | 0.224074475 | 0.335007922 | 0.891825559 | d__Bacteria | p__Firmicutes_A   | c__Clostridia      | o__Oscillospirales   | f__Ruminococcaceae    | g__Gemmiger                 | s__Gemmiger unknown_10        |
| MGYG-HGUT-02060:s__CAG-110 sp003525905        | 0.202626522 | 0.343085247 | 0.891825559 | d__Bacteria | p__Firmicutes_A   | c__Clostridia      | o__Oscillospirales   | f__Oscillospiraceae   | g__CAG-110                  | s__CAG-110 sp003525905        |
| MGYG-HGUT-02065:s__Collinsella sp002232035_26 | 0.681147621 | 0.111880672 | 0.975671757 | d__Bacteria | p__Actinobacteria | c__Corynebacteriia | o__Corynebacteriales | f__Corynebacteriaceae | g__Collinsella              | s__Collinsella sp002232035_26 |
| MGYG-HGUT-02067:s__Oscillospira               | 0.60051     | 0.14422     | 0.97567     | d__Bacteria | p__Firmicutes_A   | c__Clostridia      | o__Oscillospirales   | f__Oscillospiraceae   | g__Oscillospiraceae unknown | s__Oscillospiraceae           |



|                                                                 |                             |                                  |                             |                             |                                 |                           |                                   |                              |                                   |                                                 |                      |
|-----------------------------------------------------------------|-----------------------------|----------------------------------|-----------------------------|-----------------------------|---------------------------------|---------------------------|-----------------------------------|------------------------------|-----------------------------------|-------------------------------------------------|----------------------|
| iraceae unknown<br>unknown_7                                    | 80<br>14                    | 87<br>56                         | 17<br>57                    | eri<br>a                    |                                 |                           |                                   |                              |                                   |                                                 | unknown<br>unknown_7 |
| MGYG-HGUT-<br>02069:s__Collinsella<br>unknown_197               | 0.2<br>87<br>41<br>09<br>8  | 0.2<br>90<br>96<br>31<br>13      | 0.9<br>29<br>02<br>59<br>13 | d_<br>_B<br>act<br>eri<br>a | p__A<br>ctino<br>bacte<br>riota | c__Co<br>riobac<br>teriia | o__Cor<br>iobact<br>eriales       | f__Cori<br>obacteri<br>aceae | g__Collins<br>ella                | s__Collinsella<br>unknown_19<br>7               |                      |
| MGYG-HGUT-<br>02070:s__Eubacterium_I<br>unknown_3               | 0.7<br>72<br>64<br>68<br>91 | 0.0<br>78<br>91<br>85<br>59      | 0.9<br>79<br>52<br>04<br>84 | d_<br>_B<br>act<br>eri<br>a | p__Fi<br>rmicu<br>tes_A         | c__Clo<br>stridia         | o__Lac<br>hnospi<br>rales         | f__Lach<br>nospirac<br>eae   | g__Eubact<br>erium_I              | s__Eubacteriu<br>m_I<br>unknown_3               |                      |
| MGYG-HGUT-<br>02072:s__CAG-74<br>unknown<br>unknown_11          | 0.8<br>51<br>06<br>60<br>81 | -<br>0.0<br>52<br>21<br>38<br>03 | 0.9<br>92<br>87<br>80<br>88 | d_<br>_B<br>act<br>eri<br>a | p__Fi<br>rmicu<br>tes_A         | c__Clo<br>stridia         | o__Chr<br>istense<br>nellale<br>s | f__CAG-<br>74                | g__CAG-<br>74<br>unknown          | s__CAG-74<br>unknown<br>unknown_11              |                      |
| MGYG-HGUT-<br>02073:s__CAG-110<br>unknown_12                    | 0.3<br>84<br>71<br>00<br>76 | 0.2<br>32<br>12<br>10<br>55      | 0.9<br>39<br>70<br>92<br>5  | d_<br>_B<br>act<br>eri<br>a | p__Fi<br>rmicu<br>tes_A         | c__Clo<br>stridia         | o__Os<br>cillospi<br>rales        | f__Oscil<br>lospirac<br>eae  | g__CAG-<br>110                    | s__CAG-110<br>unknown_12                        |                      |
| MGYG-HGUT-<br>02075:s__Lachnospiraceae<br>unknown<br>unknown_18 | 0.3<br>49<br>47<br>78<br>26 | 0.2<br>60<br>57<br>54<br>06      | 0.9<br>39<br>70<br>92<br>5  | d_<br>_B<br>act<br>eri<br>a | p__Fi<br>rmicu<br>tes_A         | c__Clo<br>stridia         | o__Lac<br>hnospi<br>rales         | f__Lach<br>nospirac<br>eae   | g__Lachno<br>spiraceae<br>unknown | s__Lachnospir<br>aceae<br>unknown<br>unknown_18 |                      |
| MGYG-HGUT-<br>02080:s__Prevotella<br>unknown_26                 | 0.9<br>97<br>22<br>22<br>27 | -<br>0.0<br>00<br>92<br>86<br>53 | 0.9<br>98<br>84<br>37<br>63 | d_<br>_B<br>act<br>eri<br>a | p__B<br>acter<br>oidot<br>a     | c__Ba<br>cteroi<br>dia    | o__Bac<br>teroida<br>les          | f__Bact<br>eroidac<br>eae    | g__Prevot<br>ella                 | s__Prevotella<br>unknown_26                     |                      |
| MGYG-HGUT-<br>02083:s__Collinsella<br>sp002232035_27            | 0.7<br>27<br>31<br>07<br>79 | -<br>0.0<br>96<br>79<br>05<br>84 | 0.9<br>79<br>45<br>84<br>75 | d_<br>_B<br>act<br>eri<br>a | p__A<br>ctino<br>bacte<br>riota | c__Co<br>riobac<br>teriia | o__Cor<br>iobact<br>eriales       | f__Cori<br>obacteri<br>aceae | g__Collins<br>ella                | s__Collinsella<br>sp002232035<br>_27            |                      |
| MGYG-HGUT-<br>02085:s__CAG-170<br>unknown_7                     | 0.8<br>88<br>45<br>07<br>12 | 0.0<br>35<br>81<br>45<br>61      | 0.9<br>94<br>47<br>94<br>74 | d_<br>_B<br>act<br>eri<br>a | p__Fi<br>rmicu<br>tes_A         | c__Clo<br>stridia         | o__Os<br>cillospi<br>rales        | f__Oscil<br>lospirac<br>eae  | g__CAG-<br>170                    | s__CAG-170<br>unknown_7                         |                      |
| MGYG-HGUT-<br>02087:s__Collinsella<br>unknown_199               | 0.2<br>40<br>69             | 0.3<br>17<br>67                  | 0.9<br>02<br>18             | d_<br>_B<br>act             | p__A<br>ctino                   | c__Co<br>riobac<br>teriia | o__Cor<br>iobact<br>eriales       | f__Cori<br>obacteri<br>aceae | g__Collins<br>ella                | s__Collinsella<br>unknown_19<br>9               |                      |

|                                                          |                             |                                  |                             |                             |                             |                       |                             |                                |                                           |                                                        |
|----------------------------------------------------------|-----------------------------|----------------------------------|-----------------------------|-----------------------------|-----------------------------|-----------------------|-----------------------------|--------------------------------|-------------------------------------------|--------------------------------------------------------|
|                                                          | 61<br>6                     | 74<br>79                         | 13<br>67                    | eri<br>a                    | bacte<br>riota              |                       |                             |                                |                                           |                                                        |
| MGYG-HGUT-02090:s__CAG-83 unknown_6                      | 0.1<br>42<br>72<br>42<br>35 | 0.3<br>96<br>33<br>08<br>92      | 0.8<br>91<br>82<br>55<br>59 | d_<br>_B<br>act<br>eri<br>a | p_<br>_Firmicu<br>tes_A     | c_<br>_Clostridia     | o_<br>_Oscillospira<br>les  | f_<br>_Oscillospirac<br>eae    | g_<br>_CAG-83                             | s_<br>_CAG-83<br>unknown_6                             |
| MGYG-HGUT-02096:s__Christensenellaceae unknown unknown_3 | 0.5<br>23<br>83<br>75<br>18 | 0.1<br>68<br>88<br>22<br>82      | 0.9<br>68<br>53<br>20<br>73 | d_<br>_B<br>act<br>eri<br>a | p_<br>_Firmicu<br>tes_A     | c_<br>_Clostridia     | o_<br>_Christensenella<br>s | f_<br>_Christensenella<br>ceae | g_<br>_Christensenella<br>ceae<br>unknown | s_<br>_Christensenella<br>ceae<br>unknown<br>unknown_3 |
| MGYG-HGUT-02097:s__CAG-74 unknown unknown_12             | 0.7<br>45<br>16<br>46<br>4  | -<br>0.0<br>86<br>68<br>95<br>27 | 0.9<br>79<br>45<br>84<br>75 | d_<br>_B<br>act<br>eri<br>a | p_<br>_Firmicu<br>tes_A     | c_<br>_Clostridia     | o_<br>_Christensenella<br>s | f_<br>_CAG-74                  | g_<br>_CAG-74<br>unknown                  | s_<br>_CAG-74<br>unknown<br>unknown_12                 |
| MGYG-HGUT-02098:s__CAG-74 unknown unknown_13             | 0.0<br>10<br>09<br>49<br>86 | 0.6<br>56<br>46<br>02<br>55      | 0.7<br>68<br>22<br>58<br>34 | d_<br>_B<br>act<br>eri<br>a | p_<br>_Firmicu<br>tes_A     | c_<br>_Clostridia     | o_<br>_Christensenella<br>s | f_<br>_CAG-74                  | g_<br>_CAG-74<br>unknown                  | s_<br>_CAG-74<br>unknown<br>unknown_13                 |
| MGYG-HGUT-02099:s__UBA7102 unknown_1                     | 0.1<br>71<br>90<br>72<br>52 | 0.3<br>59<br>48<br>25<br>92      | 0.8<br>91<br>82<br>55<br>59 | d_<br>_B<br>act<br>eri<br>a | p_<br>_Firmicu<br>tes_A     | c_<br>_Clostridia     | o_<br>_Christensenella<br>s | f_<br>_UBA1750                 | g_<br>_UBA7102                            | s_<br>_UBA7102<br>unknown_1                            |
| MGYG-HGUT-02102:s__Angelakissella unknown_1              | 0.3<br>17<br>73<br>32<br>56 | 0.2<br>70<br>45<br>10<br>52      | 0.9<br>29<br>02<br>59<br>13 | d_<br>_B<br>act<br>eri<br>a | p_<br>_Firmicu<br>tes_A     | c_<br>_Clostridia     | o_<br>_Oscillospira<br>les  | f_<br>_Ruminococcaceae         | g_<br>_Angelakissella                     | s_<br>_Angelakissella<br>unknown_1                     |
| MGYG-HGUT-02105:s__Ruminococcaceae unknown unknown_13    | 0.8<br>75<br>42<br>36<br>87 | -<br>0.0<br>43<br>18<br>58<br>97 | 0.9<br>94<br>47<br>94<br>74 | d_<br>_B<br>act<br>eri<br>a | p_<br>_Firmicu<br>tes_A     | c_<br>_Clostridia     | o_<br>_Oscillospira<br>les  | f_<br>_Ruminococcaceae         | g_<br>_Ruminococcaceae<br>unknown         | s_<br>_Ruminococcaceae<br>unknown<br>unknown_13        |
| MGYG-HGUT-02107:s__Collinsella unknown_201               | 0.0<br>23<br>66<br>61<br>04 | 0.6<br>22<br>98<br>91<br>79      | 0.7<br>68<br>22<br>58<br>34 | d_<br>_B<br>act<br>eri<br>a | p_<br>_Actinobacte<br>riota | c_<br>_Coriobacteriia | o_<br>_Coriobacteriales     | f_<br>_Coriobacteriaceae       | g_<br>_Collinsella                        | s_<br>_Collinsella<br>unknown_201                      |
| MGYG-HGUT-02108:s__Prevotella sp900290275                | 0.5<br>43<br>29             | 0.1<br>65<br>56                  | 0.9<br>68<br>53             | d_<br>_B<br>act             | p_<br>_Bacteroidota         | c_<br>_Bacteroidia    | o_<br>_Bacteroidales        | f_<br>_Bacteroidaceae          | g_<br>_Prevotella                         | s_<br>_Prevotella<br>sp900290275                       |

|                                             |                             |                                  |                             |                             |                                 |                           |                             |                              |                      |                                    |
|---------------------------------------------|-----------------------------|----------------------------------|-----------------------------|-----------------------------|---------------------------------|---------------------------|-----------------------------|------------------------------|----------------------|------------------------------------|
|                                             | 67<br>63                    | 17<br>96                         | 20<br>73                    | eri<br>a                    |                                 |                           |                             |                              |                      |                                    |
| MGYG-HGUT-02109:s__UBA1232 unknown_1        | 0.0<br>10<br>05<br>12<br>04 | -<br>0.6<br>89<br>88<br>78<br>11 | 0.7<br>68<br>22<br>58<br>34 | d_<br>_B<br>act<br>eri<br>a | p__B<br>acter<br>oidot<br>a     | c__Ba<br>cteroi<br>dia    | o__Bac<br>teroida<br>les    | f__UBA<br>932                | g__UBA12<br>32       | s__UBA1232<br>unknown_1            |
| MGYG-HGUT-02110:s__Collinsella unknown_202  | 0.0<br>24<br>57<br>49<br>88 | 0.6<br>18<br>11<br>49<br>24      | 0.7<br>68<br>22<br>58<br>34 | d_<br>_B<br>act<br>eri<br>a | p__A<br>ctino<br>bacte<br>riota | c__Co<br>riobac<br>teriia | o__Cor<br>iobact<br>eriales | f__Cori<br>obacteri<br>aceae | g__Collins<br>ella   | s__Collinsella<br>unknown_20<br>2  |
| MGYG-HGUT-02111:s__Collinsella unknown_203  | 0.5<br>12<br>35<br>89<br>21 | -<br>0.1<br>83<br>95<br>38<br>51 | 0.9<br>68<br>53<br>20<br>73 | d_<br>_B<br>act<br>eri<br>a | p__A<br>ctino<br>bacte<br>riota | c__Co<br>riobac<br>teriia | o__Cor<br>iobact<br>eriales | f__Cori<br>obacteri<br>aceae | g__Collins<br>ella   | s__Collinsella<br>unknown_20<br>3  |
| MGYG-HGUT-02114:s__Oscillibacter unknown_12 | 0.7<br>74<br>10<br>39<br>53 | 0.0<br>79<br>53<br>47<br>5       | 0.9<br>79<br>52<br>04<br>84 | d_<br>_B<br>act<br>eri<br>a | p__Fi<br>rmicu<br>tes_A         | c__Clo<br>stridia         | o__Os<br>cillospi<br>rales  | f__Oscil<br>lospirac<br>eae  | g__Oscillib<br>acter | s__Oscillibact<br>er<br>unknown_12 |
| MGYG-HGUT-02115:s__CAG-110 unknown_13       | 0.1<br>10<br>38<br>32<br>71 | 0.4<br>24<br>19<br>94<br>57      | 0.8<br>83<br>30<br>72<br>56 | d_<br>_B<br>act<br>eri<br>a | p__Fi<br>rmicu<br>tes_A         | c__Clo<br>stridia         | o__Os<br>cillospi<br>rales  | f__Oscil<br>lospirac<br>eae  | g__CAG-<br>110       | s__CAG-110<br>unknown_13           |
| MGYG-HGUT-02116:s__ER4 unknown_3            | 0.2<br>68<br>37<br>01<br>59 | 0.2<br>96<br>56<br>36<br>65      | 0.9<br>20<br>49<br>41<br>92 | d_<br>_B<br>act<br>eri<br>a | p__Fi<br>rmicu<br>tes_A         | c__Clo<br>stridia         | o__Os<br>cillospi<br>rales  | f__Oscil<br>lospirac<br>eae  | g__ER4               | s__ER4<br>unknown_3                |
| MGYG-HGUT-02117:s__Collinsella unknown_205  | 0.8<br>69<br>17<br>17<br>82 | -<br>0.0<br>45<br>80<br>61<br>85 | 0.9<br>94<br>47<br>94<br>74 | d_<br>_B<br>act<br>eri<br>a | p__A<br>ctino<br>bacte<br>riota | c__Co<br>riobac<br>teriia | o__Cor<br>iobact<br>eriales | f__Cori<br>obacteri<br>aceae | g__Collins<br>ella   | s__Collinsella<br>unknown_20<br>5  |
| MGYG-HGUT-02122:s__Collinsella unknown_206  | 0.7<br>27<br>38<br>13<br>81 | 0.0<br>96<br>71<br>74<br>14      | 0.9<br>79<br>45<br>84<br>75 | d_<br>_B<br>act<br>eri<br>a | p__A<br>ctino<br>bacte<br>riota | c__Co<br>riobac<br>teriia | o__Cor<br>iobact<br>eriales | f__Cori<br>obacteri<br>aceae | g__Collins<br>ella   | s__Collinsella<br>unknown_20<br>6  |
| MGYG-HGUT-02124:s__CAG-110 unknown_14       | 0.6<br>96<br>75             | -<br>0.1<br>08                   | 0.9<br>79<br>45             | d_<br>_B<br>act             | p__Fi<br>rmicu<br>tes_A         | c__Clo<br>stridia         | o__Os<br>cillospi<br>rales  | f__Oscil<br>lospirac<br>eae  | g__CAG-<br>110       | s__CAG-110<br>unknown_14           |

|                                                      |                             |                                               |                             |                             |                             |                        |                            |                               |                                  |                                             |
|------------------------------------------------------|-----------------------------|-----------------------------------------------|-----------------------------|-----------------------------|-----------------------------|------------------------|----------------------------|-------------------------------|----------------------------------|---------------------------------------------|
|                                                      | 74<br>01                    | 13<br>19<br>11                                | 84<br>75                    | eri<br>a                    |                             |                        |                            |                               |                                  |                                             |
| MGYG-HGUT-02126:s__UBA1390 unknown_2                 | 0.0<br>57<br>94<br>00<br>18 | 0.5<br>23<br>31<br>16<br>37                   | 0.8<br>57<br>21<br>13<br>2  | d_<br>_B<br>act<br>eri<br>a | p__Fi<br>rmicu<br>tes_A     | c__Clo<br>stridia      | o__Lac<br>hnospi<br>rales  | f__UBA<br>1390                | g__UBA13<br>90                   | s__UBA1390<br>unknown_2                     |
| MGYG-HGUT-02127:s__Agathobaculum unknown_3           | 0.7<br>57<br>73<br>38<br>38 | 0.0<br>85<br>92<br>45<br>55<br>84<br>16<br>75 | 0.9<br>79<br>45<br>84<br>75 | d_<br>_B<br>act<br>eri<br>a | p__Fi<br>rmicu<br>tes_A     | c__Clo<br>stridia      | o__Os<br>cillospi<br>rales | f__Buty<br>ricicocc<br>aceae  | g__Agatho<br>baculum             | s__Agathobac<br>ulum<br>unknown_3           |
| MGYG-HGUT-02129:s__Negativibacillus unknown_1        | 0.3<br>72<br>37<br>76<br>86 | 0.2<br>44<br>51<br>42<br>63                   | 0.9<br>39<br>70<br>92<br>5  | d_<br>_B<br>act<br>eri<br>a | p__Fi<br>rmicu<br>tes_A     | c__Clo<br>stridia      | o__Os<br>cillospi<br>rales | f__Rumi<br>nococca<br>ceae    | g__Negati<br>vibacillus          | s__Negativiba<br>cillus<br>unknown_1        |
| MGYG-HGUT-02133:s__Prevotella sp000436915            | 0.6<br>32<br>39<br>49<br>58 | -<br>0.1<br>31<br>04<br>60<br>44              | 0.9<br>75<br>67<br>17<br>57 | d_<br>_B<br>act<br>eri<br>a | p__B<br>acter<br>oidot<br>a | c__Ba<br>cteroi<br>dia | o__Bac<br>teroida<br>les   | f__Bact<br>eroidac<br>eae     | g__Prevot<br>ella                | s__Prevotella<br>sp000436915                |
| MGYG-HGUT-02135:s__Anaeromassilibacillus sp002159845 | 0.3<br>15<br>58<br>51<br>13 | -<br>0.2<br>68<br>73<br>54<br>49              | 0.9<br>29<br>02<br>59<br>13 | d_<br>_B<br>act<br>eri<br>a | p__Fi<br>rmicu<br>tes_A     | c__Clo<br>stridia      | o__Os<br>cillospi<br>rales | f__Acut<br>alibacte<br>raceae | g__Anaero<br>massilibaci<br>llus | s__Anaeroma<br>ssilibacillus<br>sp002159845 |
| MGYG-HGUT-02136:s__UC5-1-2E3 sp001304875             | 0.5<br>95<br>11<br>25<br>72 | -<br>0.1<br>47<br>43<br>79<br>39              | 0.9<br>75<br>67<br>17<br>57 | d_<br>_B<br>act<br>eri<br>a | p__Fi<br>rmicu<br>tes_A     | c__Clo<br>stridia      | o__Lac<br>hnospi<br>rales  | f__Lach<br>nospirac<br>eae    | g__UC5-1-<br>2E3                 | s__UC5-1-2E3<br>sp001304875                 |
| MGYG-HGUT-02138:s__Agathobaculum unknown_4           | 0.2<br>04<br>27<br>73<br>85 | 0.3<br>55<br>24<br>51<br>21                   | 0.8<br>91<br>82<br>55<br>59 | d_<br>_B<br>act<br>eri<br>a | p__Fi<br>rmicu<br>tes_A     | c__Clo<br>stridia      | o__Os<br>cillospi<br>rales | f__Buty<br>ricicocc<br>aceae  | g__Agatho<br>baculum             | s__Agathobac<br>ulum<br>unknown_4           |
| MGYG-HGUT-02140:s__CAG-510 unknown_2                 | 0.5<br>32<br>40<br>75<br>57 | -<br>0.1<br>74<br>38<br>00<br>89              | 0.9<br>68<br>53<br>20<br>73 | d_<br>_B<br>act<br>eri<br>a | p__Fi<br>rmicu<br>tes_A     | c__Clo<br>stridia      | o__Lac<br>hnospi<br>rales  | f__Lach<br>nospirac<br>eae    | g__CAG-<br>510                   | s__CAG-510<br>unknown_2                     |

|                                               |                             |                                  |                             |                             |                                 |                           |                                     |                                |                      |                                   |
|-----------------------------------------------|-----------------------------|----------------------------------|-----------------------------|-----------------------------|---------------------------------|---------------------------|-------------------------------------|--------------------------------|----------------------|-----------------------------------|
| MGYG-HGUT-02141:s__CAG-95 unknown_2           | 0.8<br>48<br>43<br>72<br>46 | -<br>0.0<br>53<br>73<br>96<br>15 | 0.9<br>92<br>87<br>80<br>88 | d_<br>_B<br>act<br>eri<br>a | p__Fi<br>rmicu<br>tes_A         | c__Clo<br>stridia         | o__Lac<br>hnospi<br>rales           | f__Lach<br>nospi<br>rac<br>eae | g__CAG-<br>95        | s__CAG-95<br>unknown_2            |
| MGYG-HGUT-02142:s__Collinsella unknown_209    | 0.0<br>68<br>01<br>74<br>77 | 0.5<br>05<br>38<br>45<br>33      | 0.8<br>74<br>61<br>87<br>46 | d_<br>_B<br>act<br>eri<br>a | p__A<br>ctino<br>bacte<br>riota | c__Co<br>riobac<br>teriia | o__Cor<br>iobact<br>eriales         | f__Cori<br>obacteri<br>aceae   | g__Collins<br>ella   | s__Collinsella<br>unknown_20<br>9 |
| MGYG-HGUT-02143:s__CAG-83 unknown_8           | 0.1<br>93<br>33<br>13<br>35 | 0.3<br>57<br>81<br>22<br>1       | 0.8<br>91<br>82<br>55<br>59 | d_<br>_B<br>act<br>eri<br>a | p__Fi<br>rmicu<br>tes_A         | c__Clo<br>stridia         | o__Os<br>cillospi<br>rales          | f__Oscil<br>lospirac<br>eae    | g__CAG-<br>83        | s__CAG-83<br>unknown_8            |
| MGYG-HGUT-02144:s__CAG-83 unknown_9           | 0.9<br>38<br>65<br>28<br>86 | 0.0<br>20<br>85<br>10<br>06      | 0.9<br>94<br>47<br>94<br>74 | d_<br>_B<br>act<br>eri<br>a | p__Fi<br>rmicu<br>tes_A         | c__Clo<br>stridia         | o__Os<br>cillospi<br>rales          | f__Oscil<br>lospirac<br>eae    | g__CAG-<br>83        | s__CAG-83<br>unknown_9            |
| MGYG-HGUT-02145:s__Dorea phocaeense           | 0.1<br>14<br>91<br>16<br>45 | -<br>0.4<br>37<br>33<br>02<br>16 | 0.8<br>83<br>30<br>72<br>56 | d_<br>_B<br>act<br>eri<br>a | p__Fi<br>rmicu<br>tes_A         | c__Clo<br>stridia         | o__Lac<br>hnospi<br>rales           | f__Lach<br>nospi<br>rac<br>eae | g__Dorea             | s__Dorea<br>phocaeense            |
| MGYG-HGUT-02146:s__CAG-145 sp003150015        | 0.0<br>57<br>19<br>35<br>86 | 0.5<br>21<br>42<br>82<br>66      | 0.8<br>57<br>21<br>13<br>2  | d_<br>_B<br>act<br>eri<br>a | p__Fi<br>rmicu<br>tes_A         | c__Clo<br>stridia         | o__Pe<br>ptostre<br>ptococ<br>cales | f__Anae<br>rorovac<br>aceae    | g__CAG-<br>145       | s__CAG-145<br>sp003150015         |
| MGYG-HGUT-02149:s__Blautia sp003287895        | 0.7<br>51<br>39<br>46<br>78 | 0.0<br>87<br>90<br>72<br>32      | 0.9<br>79<br>45<br>84<br>75 | d_<br>_B<br>act<br>eri<br>a | p__Fi<br>rmicu<br>tes_A         | c__Clo<br>stridia         | o__Lac<br>hnospi<br>rales           | f__Lach<br>nospi<br>rac<br>eae | g__Blautia           | s__Blautia<br>sp003287895         |
| MGYG-HGUT-02150:s__Faecalibacterium unknown_5 | 0.1<br>99<br>37<br>27<br>22 | 0.3<br>58<br>15<br>00<br>75      | 0.8<br>91<br>82<br>55<br>59 | d_<br>_B<br>act<br>eri<br>a | p__Fi<br>rmicu<br>tes_A         | c__Clo<br>stridia         | o__Lac<br>hnospi<br>rales           | f__Lach<br>nospi<br>rac<br>eae | g__Faecali<br>catena | s__Faecalicat<br>ena<br>unknown_5 |
| MGYG-HGUT-02152:s__UBA5446 unknown_6          | 0.2<br>67<br>86<br>80<br>43 | -<br>0.2<br>86<br>65<br>48<br>43 | 0.9<br>20<br>49<br>41<br>92 | d_<br>_B<br>act<br>eri<br>a | p__Fi<br>rmicu<br>tes_A         | c__Clo<br>stridia         | o__Os<br>cillospi<br>rales          | f__Oscil<br>lospirac<br>eae    | g__UBA54<br>46       | s__UBA5446<br>unknown_6           |

|                                                           |                             |                                  |                             |                             |                              |                                 |                                    |                                     |                                  |                                               |
|-----------------------------------------------------------|-----------------------------|----------------------------------|-----------------------------|-----------------------------|------------------------------|---------------------------------|------------------------------------|-------------------------------------|----------------------------------|-----------------------------------------------|
| MGYG-HGUT-02153:s__CAG-484<br>sp000431315_2               | 0.3<br>77<br>27<br>05<br>24 | 0.2<br>37<br>13<br>52<br>13      | 0.9<br>39<br>70<br>92<br>5  | d_<br>_B<br>act<br>eri<br>a | p__C<br>yano<br>bacte<br>ria | c__Va<br>mpiro<br>vibrio<br>nia | o__Ga<br>strana<br>erophil<br>ales | f__Gast<br>ranaero<br>philacea<br>e | g__CAG-<br>484                   | s__CAG-484<br>sp000431315<br>_2               |
| MGYG-HGUT-02155:s__Ruthenib<br>acterium<br>unknown_1      | 0.3<br>78<br>98<br>09<br>76 | 0.2<br>46<br>74<br>48<br>14      | 0.9<br>39<br>70<br>92<br>5  | d_<br>_B<br>act<br>eri<br>a | p__Fi<br>rmicu<br>tes_A      | c__Clo<br>stridia               | o__Os<br>cillospi<br>rales         | f__Rumi<br>nococca<br>ceae          | g__Ruthen<br>ibacterium          | s__Rutheniba<br>cterium<br>unknown_1          |
| MGYG-HGUT-02156:s__CAG-83<br>unknown_10                   | 0.0<br>81<br>41<br>66<br>31 | 0.4<br>78<br>80<br>50<br>88      | 0.8<br>77<br>82<br>62<br>47 | d_<br>_B<br>act<br>eri<br>a | p__Fi<br>rmicu<br>tes_A      | c__Clo<br>stridia               | o__Os<br>cillospi<br>rales         | f__Oscil<br>lospirac<br>eae         | g__CAG-<br>83                    | s__CAG-83<br>unknown_10                       |
| MGYG-HGUT-02163:s__Methano<br>brevibacter_A<br>smithii    | 0.3<br>34<br>89<br>23<br>79 | -<br>0.2<br>60<br>77<br>69<br>46 | 0.9<br>30<br>62<br>46<br>92 | d_<br>_A<br>rc<br>ha<br>ea  | p__E<br>uryar<br>chaeo<br>ta | c__M<br>ethan<br>obact<br>eria  | o__Me<br>thanob<br>acteria<br>les  | f__Met<br>hanoba<br>cteriace<br>ae  | g__Metha<br>nobreviba<br>cter_A  | s__Methanob<br>revibacter_A<br>smithii        |
| MGYG-HGUT-02166:s__CAG-433<br>sp000433675                 | 0.9<br>36<br>47<br>09<br>6  | -<br>0.0<br>22<br>19<br>93<br>68 | 0.9<br>94<br>47<br>94<br>74 | d_<br>_B<br>act<br>eri<br>a | p__Fi<br>rmicu<br>tes        | c__Ba<br>cilli                  | o__RF<br>39                        | f__CAG-<br>433                      | g__CAG-<br>433                   | s__CAG-433<br>sp000433675                     |
| MGYG-HGUT-02168:s__Prevotella<br>unknown_28               | 0.8<br>96<br>88<br>62<br>61 | 0.0<br>34<br>50<br>17<br>96      | 0.9<br>94<br>47<br>94<br>74 | d_<br>_B<br>act<br>eri<br>a | p__B<br>acter<br>oidot<br>a  | c__Ba<br>cteroi<br>dia          | o__Bac<br>teroida<br>les           | f__Bact<br>eroidac<br>eae           | g__Prevot<br>ella                | s__Prevotella<br>unknown_28                   |
| MGYG-HGUT-02171:s__Bacteroides_B<br>sp002493165           | 0.2<br>35<br>54<br>96<br>41 | 0.3<br>31<br>19<br>79<br>75      | 0.9<br>02<br>18<br>13<br>67 | d_<br>_B<br>act<br>eri<br>a | p__B<br>acter<br>oidot<br>a  | c__Ba<br>cteroi<br>dia          | o__Bac<br>teroida<br>les           | f__Bact<br>eroidac<br>eae           | g__Bacter<br>oides_B             | s__Bacteroides<br>s_B<br>sp002493165          |
| MGYG-HGUT-02176:s__Muribaculaceae<br>unknown<br>unknown_3 | 0.7<br>71<br>15<br>85<br>65 | -<br>0.0<br>79<br>92<br>88<br>94 | 0.9<br>79<br>52<br>04<br>84 | d_<br>_B<br>act<br>eri<br>a | p__B<br>acter<br>oidot<br>a  | c__Ba<br>cteroi<br>dia          | o__Bac<br>teroida<br>les           | f__Muri<br>baculac<br>eae           | g__Muriba<br>culaceae<br>unknown | s__Muribacul<br>aceae<br>unknown<br>unknown_3 |
| MGYG-HGUT-02177:s__CAG-508<br>unknown<br>unknown_10       | 0.4<br>71<br>95<br>79<br>98 | -<br>0.1<br>96<br>66             | 0.9<br>68<br>29<br>95<br>89 | d_<br>_B<br>act<br>eri<br>a | p__Fi<br>rmicu<br>tes_A      | c__Clo<br>stridia               | o__TA<br>NB77                      | f__CAG-<br>508                      | g__CAG-<br>508<br>unknown        | s__CAG-508<br>unknown<br>unknown_10           |

|                                                          |                             |                                  |                             |                             |                                 |                           |                                     |                               |                                       |                                                    |
|----------------------------------------------------------|-----------------------------|----------------------------------|-----------------------------|-----------------------------|---------------------------------|---------------------------|-------------------------------------|-------------------------------|---------------------------------------|----------------------------------------------------|
|                                                          |                             | 28<br>84                         |                             |                             |                                 |                           |                                     |                               |                                       |                                                    |
| MGYG-HGUT-02181:s__Paramuribaculum sp000431155           | 0.9<br>51<br>27<br>66<br>28 | -<br>0.0<br>16<br>96<br>64<br>85 | 0.9<br>94<br>47<br>94<br>74 | d_<br>_B<br>act<br>eri<br>a | p__B<br>acter<br>oidot<br>a     | c__Ba<br>cteroi<br>dia    | o__Bac<br>teroida<br>les            | f__Muri<br>baculac<br>eae     | g__Param<br>uribaculu<br>m            | s__Paramurib<br>aculum<br>sp000431155              |
| MGYG-HGUT-02184:s__Collinsella unknown_211               | 0.2<br>70<br>91<br>69<br>22 | 0.3<br>03<br>41<br>51<br>46      | 0.9<br>25<br>40<br>66<br>61 | d_<br>_B<br>act<br>eri<br>a | p__A<br>ctino<br>bacte<br>riota | c__Co<br>riobac<br>teriia | o__Cor<br>iobact<br>eriales         | f__Cori<br>obacteri<br>aceae  | g__Collins<br>ella                    | s__Collinsella<br>unknown_21<br>1                  |
| MGYG-HGUT-02186:s__Ruminococcus_A sp000432335            | 0.9<br>51<br>59<br>61<br>75 | -<br>0.0<br>17<br>03<br>80<br>88 | 0.9<br>94<br>47<br>94<br>74 | d_<br>_B<br>act<br>eri<br>a | p__Fi<br>rmicu<br>tes_A         | c__Clo<br>stridia         | o__Lac<br>hnospi<br>rales           | f__Lach<br>nospi<br>raceae    | g__Rumin<br>ococcus_A                 | s__Ruminoco<br>ccus_A<br>sp000432335               |
| MGYG-HGUT-02187:s__Collinsella sp000434535               | 0.0<br>36<br>56<br>05<br>93 | 0.5<br>68<br>44<br>83<br>45      | 0.7<br>68<br>22<br>58<br>34 | d_<br>_B<br>act<br>eri<br>a | p__A<br>ctino<br>bacte<br>riota | c__Co<br>riobac<br>teriia | o__Cor<br>iobact<br>eriales         | f__Cori<br>obacteri<br>aceae  | g__Collins<br>ella                    | s__Collinsella<br>sp000434535                      |
| MGYG-HGUT-02190:s__Clostridium sp001916075               | 0.6<br>58<br>60<br>25<br>73 | -<br>0.1<br>23<br>73<br>49<br>44 | 0.9<br>75<br>67<br>17<br>57 | d_<br>_B<br>act<br>eri<br>a | p__Fi<br>rmicu<br>tes_A         | c__Clo<br>stridia         | o__Clo<br>stridial<br>es            | f__Clost<br>ridiaceae         | g__Clostri<br>dium                    | s__Clostridiu<br>m<br>sp001916075                  |
| MGYG-HGUT-02191:s__CAG-313 sp000433035                   | 0.3<br>36<br>92<br>72<br>75 | -<br>0.2<br>64<br>91<br>29<br>59 | 0.9<br>30<br>62<br>46<br>92 | d_<br>_B<br>act<br>eri<br>a | p__Fi<br>rmicu<br>tes           | c__Ba<br>cilli            | o__ML<br>615J-<br>28                | f__CAG-<br>313                | g__CAG-<br>313                        | s__CAG-313<br>sp000433035                          |
| MGYG-HGUT-02194:s__Acutalibacteraceae unknown unknown_24 | 0.9<br>49<br>79<br>06<br>61 | -<br>0.0<br>17<br>02<br>40<br>78 | 0.9<br>94<br>47<br>94<br>74 | d_<br>_B<br>act<br>eri<br>a | p__Fi<br>rmicu<br>tes_A         | c__Clo<br>stridia         | o__Os<br>cillospi<br>rales          | f__Acut<br>alibacte<br>raceae | g__Acutali<br>bacteracea<br>e unknown | s__Acutalibac<br>teraceae<br>unknown<br>unknown_24 |
| MGYG-HGUT-02195:s__Emergencia unknown_2                  | 0.3<br>14<br>84<br>44<br>28 | -<br>0.2<br>77<br>18<br>12<br>63 | 0.9<br>29<br>02<br>59<br>13 | d_<br>_B<br>act<br>eri<br>a | p__Fi<br>rmicu<br>tes_A         | c__Clo<br>stridia         | o__Pe<br>ptostre<br>ptococ<br>cales | f__Anae<br>rororac<br>aceae   | g__Emerg<br>encia                     | s__Emergenci<br>a unknown_2                        |

|                                                        |                             |                                                     |                             |                             |                                 |                            |                                         |                                 |                                        |                                                      |
|--------------------------------------------------------|-----------------------------|-----------------------------------------------------|-----------------------------|-----------------------------|---------------------------------|----------------------------|-----------------------------------------|---------------------------------|----------------------------------------|------------------------------------------------------|
| MGYG-HGUT-02202:s__Dorea sp900312975                   | 0.5<br>15<br>90<br>37<br>61 | -<br>0.1<br>78<br>53<br>71<br>20<br>75<br>73<br>81  | 0.9<br>68<br>53<br>20<br>73 | d_<br>_B<br>act<br>eri<br>a | p_<br>_Fi<br>rmicu<br>tes_A     | c_<br>_Clo<br>stridia      | o_<br>_Lac<br>hnoSPI<br>rales           | f_<br>_Lach<br>nospira<br>ceae  | g_<br>_Dorea                           | s_<br>_Dorea<br>sp900312975                          |
| MGYG-HGUT-02209:s__CAG-462 unknown_1                   | 0.0<br>10<br>08<br>87<br>5  | 0.7<br>04<br>68<br>22<br>86<br>63<br>58<br>97<br>34 | 0.7<br>68<br>22<br>58<br>34 | d_<br>_B<br>act<br>eri<br>a | p_<br>_B<br>acter<br>oidot<br>a | c_<br>_Ba<br>cteroi<br>dia | o_<br>_Bac<br>teroida<br>les            | f_<br>_Bact<br>eroidac<br>eae   | g_<br>_CAG-<br>462                     | s_<br>_CAG-462<br>unknown_1                          |
| MGYG-HGUT-02210:s__Lachnospiraceae unknown unknown_19  | 0.6<br>66<br>64<br>12<br>54 | 0.1<br>16<br>84<br>32<br>84                         | 0.9<br>75<br>67<br>17<br>57 | d_<br>_B<br>act<br>eri<br>a | p_<br>_Fi<br>rmicu<br>tes_A     | c_<br>_Clo<br>stridia      | o_<br>_Lac<br>hnoSPI<br>rales           | f_<br>_Lach<br>nospira<br>ceae  | g_<br>_Lachno<br>spiraceae<br>unknown  | s_<br>_Lachnospira<br>ceae<br>unknown<br>unknown_19  |
| MGYG-HGUT-02212:s__Blautia unknown_6                   | 0.9<br>53<br>36<br>58<br>4  | 0.0<br>16<br>16<br>34<br>64                         | 0.9<br>94<br>47<br>94<br>74 | d_<br>_B<br>act<br>eri<br>a | p_<br>_Fi<br>rmicu<br>tes_A     | c_<br>_Clo<br>stridia      | o_<br>_Lac<br>hnoSPI<br>rales           | f_<br>_Lach<br>nospira<br>ceae  | g_<br>_Blautia                         | s_<br>_Blautia<br>unknown_6                          |
| MGYG-HGUT-02213:s__Oscillospiraceae unknown unknown_10 | 0.6<br>68<br>57<br>54<br>51 | -<br>0.1<br>19<br>33<br>59<br>78                    | 0.9<br>75<br>67<br>17<br>57 | d_<br>_B<br>act<br>eri<br>a | p_<br>_Fi<br>rmicu<br>tes_A     | c_<br>_Clo<br>stridia      | o_<br>_Osc<br>illoSPI<br>rales          | f_<br>_Oscil<br>loSPIra<br>ceae | g_<br>_Oscillo<br>spiraceae<br>unknown | s_<br>_OscilloSPIra<br>ceae<br>unknown<br>unknown_10 |
| MGYG-HGUT-02214:s__Blautia_A unknown_14                | 0.4<br>78<br>82<br>17<br>42 | 0.1<br>97<br>46<br>63<br>34                         | 0.9<br>68<br>53<br>20<br>73 | d_<br>_B<br>act<br>eri<br>a | p_<br>_Fi<br>rmicu<br>tes_A     | c_<br>_Clo<br>stridia      | o_<br>_Lac<br>hnoSPI<br>rales           | f_<br>_Lach<br>nospira<br>ceae  | g_<br>_Blautia<br>_A                   | s_<br>_Blautia_A<br>unknown_14                       |
| MGYG-HGUT-02215:s__Blautia unknown_7                   | 0.1<br>31<br>26<br>96<br>93 | 0.4<br>11<br>95<br>83<br>73                         | 0.8<br>91<br>82<br>55<br>59 | d_<br>_B<br>act<br>eri<br>a | p_<br>_Fi<br>rmicu<br>tes_A     | c_<br>_Clo<br>stridia      | o_<br>_Lac<br>hnoSPI<br>rales           | f_<br>_Lach<br>nospira<br>ceae  | g_<br>_Blautia                         | s_<br>_Blautia<br>unknown_7                          |
| MGYG-HGUT-02216:s__Lachnospiraceae unknown unknown_20  | 0.3<br>20<br>29<br>76<br>54 | -<br>0.2<br>69<br>23<br>08<br>45                    | 0.9<br>29<br>17<br>51<br>76 | d_<br>_B<br>act<br>eri<br>a | p_<br>_Fi<br>rmicu<br>tes_A     | c_<br>_Clo<br>stridia      | o_<br>_Lac<br>hnoSPI<br>rales           | f_<br>_Lach<br>nospira<br>ceae  | g_<br>_Lachno<br>spiraceae<br>unknown  | s_<br>_Lachnospira<br>ceae<br>unknown<br>unknown_20  |
| MGYG-HGUT-02217:s__Emergencia unknown_3                | 0.1<br>63<br>94<br>89<br>11 | 0.3<br>65<br>85<br>82<br>75                         | 0.8<br>91<br>82<br>55<br>59 | d_<br>_B<br>act<br>eri<br>a | p_<br>_Fi<br>rmicu<br>tes_A     | c_<br>_Clo<br>stridia      | o_<br>_Pe<br>ptostre<br>ptococ<br>cales | f_<br>_Anae<br>rorac<br>aceae   | g_<br>_Emerg<br>encia                  | s_<br>_Emergenci<br>a unknown_3                      |



|                                                |                             |                                  |                             |                    |                      |                    |                   |                       |                     |                                |
|------------------------------------------------|-----------------------------|----------------------------------|-----------------------------|--------------------|----------------------|--------------------|-------------------|-----------------------|---------------------|--------------------------------|
| MGYG-HGUT-02218:s__Parabacteroides sp000436495 | 0.9<br>25<br>29<br>21<br>3  | 0.0<br>25<br>69<br>75<br>72      | 0.9<br>94<br>47<br>94<br>74 | d__Bacteroi<br>dia | p__Bacteroidota      | c__Bacteroidia     | o__Bacteroidales  | f__Tannerellaceae     | g__Parabacteroides  | s__Parabacteroides sp000436495 |
| MGYG-HGUT-02219:s__UBA1731 unknown_1           | 0.1<br>18<br>80<br>19<br>65 | 0.4<br>29<br>49<br>49<br>81      | 0.8<br>83<br>30<br>72<br>56 | d__Bacteroidia     | p__Verrucomicrobiota | c__Kiritimatiellae | o__RF P12         | f__UBA1067            | g__UBA1731          | s__UBA1731 unknown_1           |
| MGYG-HGUT-02222:s__Dialister unknown_7         | 0.2<br>10<br>62<br>05<br>84 | 0.3<br>45<br>70<br>99<br>46      | 0.8<br>91<br>82<br>55<br>59 | d__Bacteroidia     | p__Firmicutes_C      | c__Negativicutes   | o__Veillonellales | f__Dialisteraceae     | g__Dialister        | s__Dialister unknown_7         |
| MGYG-HGUT-02223:s__Faecalibacterium unknown_6  | 0.0<br>19<br>35<br>40<br>34 | 0.6<br>26<br>36<br>98<br>81      | 0.7<br>68<br>22<br>58<br>34 | d__Bacteroidia     | p__Firmicutes_A      | c__Clostridia      | o__Osillospirales | f__Ruminococcaceae    | g__Faecalibacterium | s__Faecalibacterium unknown_6  |
| MGYG-HGUT-02224:s__Faecalibacterium unknown_7  | 0.0<br>65<br>15<br>50<br>03 | 0.5<br>11<br>68<br>32<br>38      | 0.8<br>57<br>21<br>13<br>2  | d__Bacteroidia     | p__Firmicutes_A      | c__Clostridia      | o__Osillospirales | f__Ruminococcaceae    | g__Faecalibacterium | s__Faecalibacterium unknown_7  |
| MGYG-HGUT-02226:s__CAG-81 unknown_1            | 0.9<br>68<br>74<br>90<br>23 | 0.0<br>10<br>90<br>26<br>88      | 0.9<br>94<br>47<br>94<br>74 | d__Bacteroidia     | p__Firmicutes_A      | c__Clostridia      | o__Lachnospirales | f__Lachnospiraceae    | g__CAG-81           | s__CAG-81 unknown_1            |
| MGYG-HGUT-02229:s__Oscillibacter unknown_13    | 0.0<br>79<br>77<br>48<br>78 | 0.4<br>72<br>92<br>98<br>18      | 0.8<br>77<br>82<br>62<br>47 | d__Bacteroidia     | p__Firmicutes_A      | c__Clostridia      | o__Osillospirales | f__Oscillospiraceae   | g__Oscillibacter    | s__Oscillibacter unknown_13    |
| MGYG-HGUT-02230:s__Ruminococcus unknown_4      | 0.8<br>16<br>56<br>15<br>91 | 0.0<br>64<br>84<br>56<br>9       | 0.9<br>87<br>66<br>45<br>39 | d__Bacteroidia     | p__Firmicutes_A      | c__Clostridia      | o__Osillospirales | f__Ruminococcaceae    | g__Ruminococcus     | s__Ruminococcus unknown_4      |
| MGYG-HGUT-02233:s__Acutalibacter unknown_6     | 0.9<br>01<br>76<br>93<br>68 | -<br>0.0<br>33<br>45<br>77<br>65 | 0.9<br>94<br>47<br>94<br>74 | d__Bacteroidia     | p__Firmicutes_A      | c__Clostridia      | o__Osillospirales | f__Acutalibacteraceae | g__Acutalibacter    | s__Acutalibacter unknown_6     |

|                                                   |             |             |             |             |                 |               |                       |                        |                            |                                   |
|---------------------------------------------------|-------------|-------------|-------------|-------------|-----------------|---------------|-----------------------|------------------------|----------------------------|-----------------------------------|
| MGYG-HGUT-02234:s__Coproccoccus_B unknown_1       | 0.106163886 | 0.423061943 | 0.883307256 | d__Bacteria | p__Firmicutes_A | c__Clostridia | o__Lachnospirales     | f__Lachnospiraceae     | g__Coproccoccus_B          | s__Coproccoccus_B unknown_1       |
| MGYG-HGUT-02238:s__CAG-110 unknown_15             | 0.675208457 | 0.113872324 | 0.975671757 | d__Bacteria | p__Firmicutes_A | c__Clostridia | o__Oscillospirales    | f__Oscillospiraceae    | g__CAG-110                 | s__CAG-110 unknown_15             |
| MGYG-HGUT-02247:s__Acetatifaactor unknown_6       | 0.78351704  | 0.07641305  | 0.981180764 | d__Bacteria | p__Firmicutes_A | c__Clostridia | o__Lachnospirales     | f__Lachnospiraceae     | g__Acetatifaactor          | s__Acetatifaactor unknown_6       |
| MGYG-HGUT-02254:s__CAG-110 unknown_17             | 0.663230624 | 0.120453085 | 0.975671757 | d__Bacteria | p__Firmicutes_A | c__Clostridia | o__Oscillospirales    | f__Oscillospiraceae    | g__CAG-110                 | s__CAG-110 unknown_17             |
| MGYG-HGUT-02256:s__Lachnospiraceae unknown_21     | 0.278967873 | 0.302851077 | 0.929025913 | d__Bacteria | p__Firmicutes_A | c__Clostridia | o__Lachnospirales     | f__Lachnospiraceae     | g__Lachnospiraceae unknown | s__Lachnospiraceae unknown_21     |
| MGYG-HGUT-02263:s__Ruminococcus_E unknown_2       | 0.319205067 | 0.269552093 | 0.929025913 | d__Bacteria | p__Firmicutes_A | c__Clostridia | o__Oscillospirales    | f__Acetivibacteraceae  | g__Ruminococcus_E          | s__Ruminococcus_E unknown_2       |
| MGYG-HGUT-02267:s__Eisenbergiella unknown_5       | 0.838485572 | -0.0572973  | 0.992878088 | d__Bacteria | p__Firmicutes_A | c__Clostridia | o__Lachnospirales     | f__Lachnospiraceae     | g__Eisenbergiella          | s__Eisenbergiella unknown_5       |
| MGYG-HGUT-02268:s__Absiella unknown_4             | 0.887584466 | 0.039378407 | 0.994479474 | d__Bacteria | p__Firmicutes   | c__Bacilli    | o__Erysipelotrichales | f__Erysipelotrichaceae | g__Absiella                | s__Absiella unknown_4             |
| MGYG-HGUT-02271:s__GCA-900066135 sp900066135      | 0.249597161 | 0.32145833  | 0.902181367 | d__Bacteria | p__Firmicutes_A | c__Clostridia | o__Lachnospirales     | f__Lachnospiraceae     | g__GCA-900066135           | s__GCA-900066135 sp900066135      |
| MGYG-HGUT-02272:s__Faecalibacterium prausnitzii_D | 0.47133     | -0.201      | 0.96819     | d__Bacteria | p__Firmicutes_A | c__Clostridia | o__Oscillospirales    | f__Ruminococcaceae     | g__Faecalibacterium        | s__Faecalibacterium prausnitzii_D |

|                                                                 |                             |                             |                             |                             |                             |                        |                            |                            |                                   |                                             |
|-----------------------------------------------------------------|-----------------------------|-----------------------------|-----------------------------|-----------------------------|-----------------------------|------------------------|----------------------------|----------------------------|-----------------------------------|---------------------------------------------|
| acterium<br>prausnitzii_D                                       | 01<br>76                    | 65<br>22<br>55              | 40<br>79                    | eri<br>a                    |                             |                        |                            |                            |                                   |                                             |
| MGYG-HGUT-<br>02273:s__Bacteroides<br>stercorisoris             | 0.8<br>17<br>51<br>95<br>94 | 0.0<br>64<br>43<br>65<br>75 | 0.9<br>87<br>66<br>45<br>39 | d_<br>_B<br>act<br>eri<br>a | p__B<br>acter<br>oidot<br>a | c__Ba<br>cteroi<br>dia | o__Bac<br>teroida<br>les   | f__Bact<br>eroidac<br>eae  | g__Bacter<br>oides                | s__Bacteroides<br>stercorisoris             |
| MGYG-HGUT-<br>02274:s__Faecalibacterium<br>prausnitzii_I        | 0.1<br>47<br>46<br>12<br>86 | 0.4<br>02<br>20<br>11<br>53 | 0.8<br>91<br>82<br>55<br>59 | d_<br>_B<br>act<br>eri<br>a | p__Fi<br>rmicutes_A         | c__Clo<br>stridia      | o__Os<br>cillospi<br>rales | f__Rumi<br>nococca<br>ceae | g__Faecali<br>bacterium           | s__Faecalibacterium<br>prausnitzii_I        |
| MGYG-HGUT-<br>02275:s__Paraprevotella<br>unknown_5              | 0.9<br>46<br>99<br>52<br>32 | 0.0<br>18<br>59<br>92<br>79 | 0.9<br>94<br>47<br>94<br>74 | d_<br>_B<br>act<br>eri<br>a | p__B<br>acter<br>oidot<br>a | c__Ba<br>cteroi<br>dia | o__Bac<br>teroida<br>les   | f__Bact<br>eroidac<br>eae  | g__Parapr<br>evotella             | s__Paraprevotella<br>unknown_5              |
| MGYG-HGUT-<br>02276:s__Lachnospiraceae<br>unknown<br>unknown_22 | 0.1<br>06<br>40<br>15<br>67 | 0.4<br>50<br>43<br>85<br>96 | 0.8<br>83<br>30<br>72<br>56 | d_<br>_B<br>act<br>eri<br>a | p__Fi<br>rmicutes_A         | c__Clo<br>stridia      | o__Lac<br>hnospi<br>rales  | f__Lach<br>nospirac<br>eae | g__Lachno<br>spiraceae<br>unknown | s__Lachnospiraceae<br>unknown<br>unknown_22 |
| MGYG-HGUT-<br>02277:s__Marvinbryantia<br>sp900066075            | 0.2<br>40<br>14<br>29<br>31 | 0.3<br>28<br>89<br>56<br>31 | 0.9<br>02<br>18<br>13<br>67 | d_<br>_B<br>act<br>eri<br>a | p__Fi<br>rmicutes_A         | c__Clo<br>stridia      | o__Lac<br>hnospi<br>rales  | f__Lach<br>nospirac<br>eae | g__Marvin<br>bryantia             | s__Marvinbryantia<br>sp900066075            |
| MGYG-HGUT-<br>02278:s__Eubacterium_I<br>ramulus_A               | 0.3<br>43<br>98<br>85<br>2  | 0.2<br>62<br>47<br>63<br>65 | 0.9<br>39<br>70<br>92<br>5  | d_<br>_B<br>act<br>eri<br>a | p__Fi<br>rmicutes_A         | c__Clo<br>stridia      | o__Lac<br>hnospi<br>rales  | f__Lach<br>nospirac<br>eae | g__Eubact<br>erium_I              | s__Eubacterium_I<br>ramulus_A               |
| MGYG-HGUT-<br>02279:s__Dorea<br>longicatena_B                   | 0.3<br>79<br>10<br>71<br>23 | 0.2<br>41<br>11<br>73<br>61 | 0.9<br>39<br>70<br>92<br>5  | d_<br>_B<br>act<br>eri<br>a | p__Fi<br>rmicutes_A         | c__Clo<br>stridia      | o__Lac<br>hnospi<br>rales  | f__Lach<br>nospirac<br>eae | g__Dorea                          | s__Dorea<br>longicatena_B                   |
| MGYG-HGUT-<br>02280:s__UBA9502<br>unknown_6                     | 0.5<br>06<br>36<br>68<br>44 | 0.1<br>86<br>48<br>06<br>17 | 0.9<br>68<br>53<br>20<br>73 | d_<br>_B<br>act<br>eri<br>a | p__Fi<br>rmicutes_A         | c__Clo<br>stridia      | o__Lac<br>hnospi<br>rales  | f__Lach<br>nospirac<br>eae | g__UBA95<br>02                    | s__UBA9502<br>unknown_6                     |
| MGYG-HGUT-<br>02281:s__Bacteroides<br>faecis                    | 0.7<br>76<br>09<br>98<br>03 | 0.0<br>79<br>91<br>91<br>45 | 0.9<br>79<br>52<br>04<br>84 | d_<br>_B<br>act<br>eri<br>a | p__B<br>acter<br>oidot<br>a | c__Ba<br>cteroi<br>dia | o__Bac<br>teroida<br>les   | f__Bact<br>eroidac<br>eae  | g__Bacter<br>oides                | s__Bacteroides<br>faecis                    |

|                                                     |             |               |             |             |                 |                  |                     |                     |                           |                                     |
|-----------------------------------------------------|-------------|---------------|-------------|-------------|-----------------|------------------|---------------------|---------------------|---------------------------|-------------------------------------|
| MGYG-HGUT-02282:s__Parabacteroides gordonii         | 0.676950545 | -0.115006659  | 0.975671757 | d__Bacteria | p__Bacteroidota | c__Bacteroidia   | o__Bacteroidales    | f__Tannerellaceae   | g__Parabacteroides        | s__Parabacteroides gordonii         |
| MGYG-HGUT-02284:s__Megamonas funiformis             | 0.832348811 | -0.0580005107 | 0.99222019  | d__Bacteria | p__Firmicutes_C | c__Negativicutes | o__Selenuomonadales | f__Selemonadaceae   | g__Megamonas              | s__Megamonas funiformis             |
| MGYG-HGUT-02285:s__CAG-95 sp900066375               | 0.252196191 | 0.319044372   | 0.902181367 | d__Bacteria | p__Firmicutes_A | c__Clostridia    | o__Lachnospirales   | f__Lachnospiraceae  | g__CAG-95                 | s__CAG-95 sp900066375               |
| MGYG-HGUT-02286:s__Blautia sp000436935              | 0.061609124 | 0.516443657   | 0.85721132  | d__Bacteria | p__Firmicutes_A | c__Clostridia    | o__Lachnospirales   | f__Lachnospiraceae  | g__Blautia                | s__Blautia sp000436935              |
| MGYG-HGUT-02287:s__Agathobaculum unknown_5          | 0.33798289  | 0.268533595   | 0.930624692 | d__Bacteria | p__Firmicutes_A | c__Clostridia    | o__Oscillospirales  | f__Butyriricocaceae | g__Agathobaculum          | s__Agathobaculum unknown_5          |
| MGYG-HGUT-02288:s__Bacillus_A sp001884105           | 0.584698979 | 0.14600761757 | 0.975671757 | d__Bacteria | p__Firmicutes   | c__Bacilli       | o__Bacillales       | f__Bacillaceae_G    | g__Bacillus_A             | s__Bacillus_A sp001884105           |
| MGYG-HGUT-02289:s__Coproccoccus sp000433075         | 0.161262873 | 0.387873569   | 0.891825559 | d__Bacteria | p__Firmicutes_A | c__Clostridia    | o__Lachnospirales   | f__Lachnospiraceae  | g__Coproccoccus           | s__Coproccoccus sp000433075         |
| MGYG-HGUT-02290:s__Sellimonas sp002161525           | 0.390998736 | -0.234346738  | 0.93970925  | d__Bacteria | p__Firmicutes_A | c__Clostridia    | o__Lachnospirales   | f__Lachnospiraceae  | g__Sellimonas             | s__Sellimonas sp002161525           |
| MGYG-HGUT-02291:s__Bacteroidaceae unknown unknown_2 | 0.623445479 | -0.130781757  | 0.975671757 | d__Bacteria | p__Bacteroidota | c__Bacteroidia   | o__Bacteroidales    | f__Bacteroidaceae   | g__Bacteroidaceae unknown | s__Bacteroidaceae unknown unknown_2 |

|                                                 |                             |                                   |                             |                             |                                 |                           |                             |                              |                       |                                        |
|-------------------------------------------------|-----------------------------|-----------------------------------|-----------------------------|-----------------------------|---------------------------------|---------------------------|-----------------------------|------------------------------|-----------------------|----------------------------------------|
|                                                 |                             | 77<br>89                          |                             |                             |                                 |                           |                             |                              |                       |                                        |
| MGYG-HGUT-02292:s__TF01-11 sp003529475          | 0.1<br>39<br>02<br>28<br>34 | 0.4<br>09<br>79<br>11<br>83       | 0.8<br>91<br>82<br>55<br>59 | d_<br>_B<br>act<br>eri<br>a | p__Fi<br>rmicu<br>tes_A         | c__Clo<br>stridia         | o__Lac<br>hnoSPI<br>rales   | f__Lach<br>nospira<br>ceae   | g__TF01-<br>11        | s__TF01-11<br>sp003529475              |
| MGYG-HGUT-02293:s__Prevotella copri             | 0.8<br>94<br>16<br>52<br>05 | 0.0<br>36<br>58<br>47<br>05<br>17 | 0.9<br>94<br>47<br>94<br>74 | d_<br>_B<br>act<br>eri<br>a | p__B<br>acter<br>oidot<br>a     | c__Ba<br>cteroi<br>dia    | o__Bac<br>teroida<br>les    | f__Bact<br>eroidac<br>eae    | g__Prevot<br>ella     | s__Prevotella<br>copri                 |
| MGYG-HGUT-02294:s__Collinsella sp002232035_28   | 0.6<br>62<br>68<br>18<br>26 | 0.1<br>18<br>92<br>27<br>97       | 0.9<br>75<br>67<br>17<br>57 | d_<br>_B<br>act<br>eri<br>a | p__A<br>ctino<br>bacte<br>riota | c__Co<br>riobac<br>teriia | o__Cor<br>iobact<br>eriales | f__Cori<br>obacteri<br>aceae | g__Collins<br>ella    | s__Collinsella<br>sp002232035<br>_28   |
| MGYG-HGUT-02295:s__Ruminococcus_C callidus      | 0.2<br>85<br>43<br>32<br>4  | -<br>0.2<br>88<br>58<br>10<br>83  | 0.9<br>29<br>02<br>59<br>13 | d_<br>_B<br>act<br>eri<br>a | p__Fi<br>rmicu<br>tes_A         | c__Clo<br>stridia         | o__Os<br>cillospi<br>rales  | f__Rumi<br>nococca<br>ceae   | g__Rumin<br>ococcus_C | s__Ruminoco<br>ccus_C<br>callidus      |
| MGYG-HGUT-02296:s__Streptococcus sp000479315    | 0.1<br>70<br>13<br>54<br>01 | 0.3<br>78<br>99<br>10<br>15       | 0.8<br>91<br>82<br>55<br>59 | d_<br>_B<br>act<br>eri<br>a | p__Fi<br>rmicu<br>tes           | c__Ba<br>cilli            | o__Lac<br>tobacill<br>ales  | f__Stre<br>ptococc<br>aceae  | g__Strepto<br>coccus  | s__Streptococ<br>cus<br>sp000479315    |
| MGYG-HGUT-02297:s__TF01-11 sp001916135          | 0.6<br>50<br>97<br>97<br>33 | 0.1<br>25<br>30<br>83<br>2        | 0.9<br>75<br>67<br>17<br>57 | d_<br>_B<br>act<br>eri<br>a | p__Fi<br>rmicu<br>tes_A         | c__Clo<br>stridia         | o__Lac<br>hnoSPI<br>rales   | f__Lach<br>nospira<br>ceae   | g__TF01-<br>11        | s__TF01-11<br>sp001916135              |
| MGYG-HGUT-02298:s__Blautia_A sp000436615        | 0.2<br>16<br>12<br>67<br>13 | 0.3<br>45<br>49<br>39<br>73       | 0.8<br>91<br>82<br>55<br>59 | d_<br>_B<br>act<br>eri<br>a | p__Fi<br>rmicu<br>tes_A         | c__Clo<br>stridia         | o__Lac<br>hnoSPI<br>rales   | f__Lach<br>nospira<br>ceae   | g__Blautia<br>_A      | s__Blautia_A<br>sp000436615            |
| MGYG-HGUT-02300:s__Bacteroides cutis            | 0.0<br>42<br>18<br>58<br>75 | -<br>0.5<br>62<br>24<br>82<br>84  | 0.7<br>79<br>32<br>10<br>52 | d_<br>_B<br>act<br>eri<br>a | p__B<br>acter<br>oidot<br>a     | c__Ba<br>cteroi<br>dia    | o__Bac<br>teroida<br>les    | f__Bact<br>eroidac<br>eae    | g__Bacter<br>oides    | s__Bacteroides<br>cutis                |
| MGYG-HGUT-02302:s__Streptococcus vestibularis_2 | 0.5<br>47<br>26             | 0.1<br>67<br>32                   | 0.9<br>68<br>53             | d_<br>_B<br>act             | p__Fi<br>rmicu<br>tes           | c__Ba<br>cilli            | o__Lac<br>tobacill<br>ales  | f__Stre<br>ptococc<br>aceae  | g__Strepto<br>coccus  | s__Streptococ<br>cus<br>vestibularis_2 |

|                                               |                             |                                  |                             |                             |                               |                                        |                             |                               |                        |                                      |
|-----------------------------------------------|-----------------------------|----------------------------------|-----------------------------|-----------------------------|-------------------------------|----------------------------------------|-----------------------------|-------------------------------|------------------------|--------------------------------------|
|                                               | 97<br>54                    | 74<br>61                         | 20<br>73                    | eri<br>a                    |                               |                                        |                             |                               |                        |                                      |
| MGYG-HGUT-02303:s__Ruminococcus_E unknown_3   | 0.4<br>06<br>37<br>92<br>17 | 0.2<br>25<br>67<br>03<br>95      | 0.9<br>39<br>70<br>92<br>5  | d_<br>_B<br>act<br>eri<br>a | p__Fi<br>rmicu<br>tes_A       | c__Clo<br>stridia                      | o__Os<br>cillospi<br>rales  | f__Acut<br>alibacte<br>raceae | g__Rumin<br>ococcus_E  | s__Ruminoco<br>ccus_E<br>unknown_3   |
| MGYG-HGUT-02304:s__UBA7182 unknown_2          | 0.0<br>59<br>38<br>15<br>25 | 0.5<br>14<br>99<br>64<br>94      | 0.8<br>57<br>21<br>13<br>2  | d_<br>_B<br>act<br>eri<br>a | p__Fi<br>rmicu<br>tes_A       | c__Clo<br>stridia                      | o__Lac<br>hnospi<br>rales   | f__Lach<br>nospi<br>rales     | g__UBA71<br>82         | s__UBA7182<br>unknown_2              |
| MGYG-HGUT-02312:s__Blautia_A sp000285855      | 0.7<br>32<br>70<br>62<br>5  | 0.0<br>92<br>85<br>44<br>67      | 0.9<br>79<br>45<br>84<br>75 | d_<br>_B<br>act<br>eri<br>a | p__Fi<br>rmicu<br>tes_A       | c__Clo<br>stridia                      | o__Lac<br>hnospi<br>rales   | f__Lach<br>nospi<br>rales     | g__Blautia<br>_A       | s__Blautia_A<br>sp000285855          |
| MGYG-HGUT-02320:s__Enterococcus_B faecium_B   | 0.0<br>09<br>12<br>68<br>51 | -<br>0.7<br>13<br>27<br>23<br>73 | 0.7<br>68<br>22<br>58<br>34 | d_<br>_B<br>act<br>eri<br>a | p__Fi<br>rmicu<br>tes         | c__Ba<br>cilli                         | o__Lac<br>tobacill<br>ales  | f__Ente<br>rococca<br>ceae    | g__Entero<br>coccus_B  | s__Enterococ<br>cus_B<br>faecium_B   |
| MGYG-HGUT-02321:s__Ruminococcus_D bicirculans | 0.8<br>73<br>11<br>84<br>31 | -<br>0.0<br>43<br>22<br>28<br>27 | 0.9<br>94<br>47<br>94<br>74 | d_<br>_B<br>act<br>eri<br>a | p__Fi<br>rmicu<br>tes_A       | c__Clo<br>stridia                      | o__Os<br>cillospi<br>rales  | f__Rumi<br>nococca<br>ceae    | g__Rumin<br>ococcus_D  | s__Ruminoco<br>ccus_D<br>bicirculans |
| MGYG-HGUT-02322:s__Escherichia marmotae       | 0.8<br>04<br>94<br>14<br>62 | -<br>0.0<br>66<br>64<br>66<br>63 | 0.9<br>87<br>14<br>23<br>02 | d_<br>_B<br>act<br>eri<br>a | p__Pr<br>oteob<br>acteri<br>a | c__Ga<br>mmap<br>roteo<br>bacter<br>ia | o__Ent<br>erobac<br>terales | f__Ente<br>robacte<br>riaceae | g__Escheri<br>chia     | s__Escherichi<br>a marmotae          |
| MGYG-HGUT-02323:s__Escherichia sp000208585    | 0.9<br>00<br>54<br>07<br>75 | -<br>0.0<br>34<br>24<br>10<br>6  | 0.9<br>94<br>47<br>94<br>74 | d_<br>_B<br>act<br>eri<br>a | p__Pr<br>oteob<br>acteri<br>a | c__Ga<br>mmap<br>roteo<br>bacter<br>ia | o__Ent<br>erobac<br>terales | f__Ente<br>robacte<br>riaceae | g__Escheri<br>chia     | s__Escherichi<br>a<br>sp000208585    |
| MGYG-HGUT-02324:s__Lactobacillus_B salivarius | 0.6<br>78<br>75<br>43<br>53 | 0.1<br>15<br>77<br>52<br>78      | 0.9<br>75<br>67<br>17<br>57 | d_<br>_B<br>act<br>eri<br>a | p__Fi<br>rmicu<br>tes         | c__Ba<br>cilli                         | o__Lac<br>tobacill<br>ales  | f__Lact<br>obacilla<br>ceae   | g__Lactob<br>acillus_B | s__Lactobacill<br>us_B<br>salivarius |

|                                                     |                             |                                  |                             |                             |                               |                          |                                   |                                |                       |                                                |
|-----------------------------------------------------|-----------------------------|----------------------------------|-----------------------------|-----------------------------|-------------------------------|--------------------------|-----------------------------------|--------------------------------|-----------------------|------------------------------------------------|
| MGYG-HGUT-02327:s__Oscillibacter sp900066435        | 0.4<br>61<br>55<br>96<br>47 | -<br>0.1<br>92<br>24<br>87<br>73 | 0.9<br>65<br>57<br>46<br>92 | d_<br>_B<br>act<br>eri<br>a | p__Fi<br>rmicu<br>tes_A       | c__Clo<br>stridia        | o__Os<br>cillospi<br>rales        | f__Oscil<br>lospirac<br>eae    | g__Oscilib<br>acter   | s__Oscillibact<br>er<br>sp900066435            |
| MGYG-HGUT-02328:s__Clostridium_M asparagiforme      | 0.6<br>27<br>76<br>60<br>09 | -<br>0.1<br>34<br>96<br>44<br>67 | 0.9<br>75<br>67<br>17<br>57 | d_<br>_B<br>act<br>eri<br>a | p__Fi<br>rmicu<br>tes_A       | c__Clo<br>stridia        | o__Lac<br>hnospi<br>rales         | f__Lach<br>nospi<br>rales      | g__Clostri<br>dium_M  | s__Clostridiu<br>m_M<br>asparagiforme          |
| MGYG-HGUT-02329:s__Dielma sp001305055               | 0.7<br>07<br>39<br>45<br>7  | 0.1<br>01<br>72<br>29<br>32      | 0.9<br>79<br>45<br>84<br>75 | d_<br>_B<br>act<br>eri<br>a | p__Fi<br>rmicu<br>tes         | c__Ba<br>cilli           | o__Ery<br>sipelot<br>richale<br>s | f__Erysi<br>pelotric<br>haceae | g__Dielma             | s__Dielma<br>sp001305055                       |
| MGYG-HGUT-02330:s__Eisenbergiella tayi              | 0.7<br>41<br>85<br>16<br>3  | 0.0<br>89<br>97<br>80<br>2       | 0.9<br>79<br>45<br>84<br>75 | d_<br>_B<br>act<br>eri<br>a | p__Fi<br>rmicu<br>tes_A       | c__Clo<br>stridia        | o__Lac<br>hnospi<br>rales         | f__Lach<br>nospi<br>rales      | g__Eisenb<br>ergiella | s__Eisenbergi<br>ella tayi                     |
| MGYG-HGUT-02336:s__Megasphaera sp000417505          | 0.6<br>05<br>41<br>48<br>95 | -<br>0.1<br>42<br>59<br>01<br>59 | 0.9<br>75<br>67<br>17<br>57 | d_<br>_B<br>act<br>eri<br>a | p__Fi<br>rmicu<br>tes_C       | c__Ne<br>gativic<br>utes | o__Vei<br>llonella<br>les         | f__Meg<br>asphaer<br>aceae     | g__Megas<br>phaera    | s__Megaspha<br>era<br>sp000417505              |
| MGYG-HGUT-02340:s__Intestinimonas butyriciproducens | 0.5<br>94<br>87<br>24<br>25 | 0.1<br>44<br>15<br>72<br>74      | 0.9<br>75<br>67<br>17<br>57 | d_<br>_B<br>act<br>eri<br>a | p__Fi<br>rmicu<br>tes_A       | c__Clo<br>stridia        | o__Os<br>cillospi<br>rales        | f__Oscil<br>lospirac<br>eae    | g__Intesti<br>nimonas | s__Intestinim<br>onas<br>butyriciprodu<br>cens |
| MGYG-HGUT-02347:s__Streptococcus anginosus_C        | 0.5<br>05<br>83<br>05<br>4  | 0.1<br>82<br>72<br>92<br>31      | 0.9<br>68<br>53<br>20<br>73 | d_<br>_B<br>act<br>eri<br>a | p__Fi<br>rmicu<br>tes         | c__Ba<br>cilli           | o__Lac<br>tobacill<br>ales        | f__Stre<br>ptococc<br>aceae    | g__Strepto<br>coccus  | s__Streptococ<br>cus<br>anginosus_C            |
| MGYG-HGUT-02349:s__Streptococcus agalactiae         | 0.6<br>16<br>43<br>26<br>62 | -<br>0.1<br>38<br>43<br>67<br>01 | 0.9<br>75<br>67<br>17<br>57 | d_<br>_B<br>act<br>eri<br>a | p__Fi<br>rmicu<br>tes         | c__Ba<br>cilli           | o__Lac<br>tobacill<br>ales        | f__Stre<br>ptococc<br>aceae    | g__Strepto<br>coccus  | s__Streptococ<br>cus agalactiae                |
| MGYG-HGUT-02351:s__Klebsiella_A michiganensis       | 0.8<br>22<br>09             | -<br>0.0<br>58<br>75             | 0.9<br>91<br>13             | d_<br>_B<br>act             | p__Pr<br>oteob<br>acteri<br>a | c__Ga<br>mmap<br>roteo   | o__Ent<br>erobac<br>terales       | f__Ente<br>robacte<br>riaceae  | g__Klebsie<br>lla_A   | s__Klebsiella_<br>A<br>michiganensis           |

|                                                   |                             |                                  |                             |                             |                                      |                                        |                                     |                                      |                       |                                              |
|---------------------------------------------------|-----------------------------|----------------------------------|-----------------------------|-----------------------------|--------------------------------------|----------------------------------------|-------------------------------------|--------------------------------------|-----------------------|----------------------------------------------|
|                                                   | 76<br>91                    | 23<br>42                         | 66<br>22                    | eri<br>a                    |                                      | bacter<br>ia                           |                                     |                                      |                       |                                              |
| MGYG-HGUT-02352:s__Gordonibacter urolithinfaciens | 0.3<br>35<br>22<br>79<br>06 | 0.2<br>69<br>68<br>69<br>07      | 0.9<br>30<br>62<br>46<br>92 | d_<br>_B<br>act<br>eri<br>a | p__A<br>ctino<br>bacte<br>riota      | c__Co<br>riobac<br>teriia              | o__Cor<br>iobact<br>eriales         | f__Egge<br>rthellac<br>eae           | g__Gordo<br>nibacter  | s__Gordoniba<br>cter<br>urolithinfacie<br>ns |
| MGYG-HGUT-02353:s__Enterococcus_B faecium         | 0.0<br>52<br>74<br>37<br>46 | -<br>0.5<br>37<br>36<br>98<br>04 | 0.8<br>57<br>21<br>13<br>2  | d_<br>_B<br>act<br>eri<br>a | p__Fi<br>rmicu<br>tes                | c__Ba<br>cilli                         | o__Lac<br>tobacill<br>ales          | f__Ente<br>rococca<br>ceae           | g__Entero<br>coccus_B | s__Enterococ<br>cus_B<br>faecium             |
| MGYG-HGUT-02363:s__Raoultella ornithinolytica     | 0.3<br>96<br>53<br>04<br>74 | 0.2<br>24<br>45<br>45<br>47      | 0.9<br>39<br>70<br>92<br>5  | d_<br>_B<br>act<br>eri<br>a | p__Pr<br>oteob<br>acteri<br>a        | c__Ga<br>mmap<br>roteo<br>bacter<br>ia | o__Ent<br>erobac<br>terales         | f__Ente<br>robacte<br>riaceae        | g__Raoult<br>ella     | s__Raoultella<br>ornithinolytic<br>a         |
| MGYG-HGUT-02366:s__Salmonella enterica            | 0.9<br>31<br>56<br>90<br>95 | -<br>0.0<br>23<br>12<br>30<br>15 | 0.9<br>94<br>47<br>94<br>74 | d_<br>_B<br>act<br>eri<br>a | p__Pr<br>oteob<br>acteri<br>a        | c__Ga<br>mmap<br>roteo<br>bacter<br>ia | o__Ent<br>erobac<br>terales         | f__Ente<br>robacte<br>riaceae        | g__Salmon<br>ella     | s__Salmonell<br>a enterica                   |
| MGYG-HGUT-02369:s__Clostridioides difficile       | 0.4<br>36<br>23<br>50<br>45 | -<br>0.2<br>07<br>62<br>95<br>28 | 0.9<br>50<br>80<br>65<br>94 | d_<br>_B<br>act<br>eri<br>a | p__Fi<br>rmicu<br>tes_A              | c__Clo<br>stridia                      | o__Pe<br>ptostre<br>ptococ<br>cales | f__Pept<br>ostrept<br>ococcae<br>eae | g__Clostri<br>dioides | s__Clostridioi<br>des difficile              |
| MGYG-HGUT-02376:s__Dorea sp000765215              | 0.1<br>83<br>93<br>22<br>62 | -<br>0.3<br>70<br>06<br>96<br>02 | 0.8<br>91<br>82<br>55<br>59 | d_<br>_B<br>act<br>eri<br>a | p__Fi<br>rmicu<br>tes_A              | c__Clo<br>stridia                      | o__Lac<br>hnospi<br>rales           | f__Lach<br>nospira<br>ceae           | g__Dorea              | s__Dorea<br>sp000765215                      |
| MGYG-HGUT-02378:s__Akkermansia sp001580195        | 0.5<br>41<br>24<br>34<br>98 | 0.1<br>63<br>94<br>92<br>37      | 0.9<br>68<br>53<br>20<br>73 | d_<br>_B<br>act<br>eri<br>a | p__V<br>erruc<br>omicr<br>obiot<br>a | c__Ve<br>rruco<br>micro<br>biae        | o__Ver<br>rucomi<br>crobial<br>es   | f__Akke<br>rmansia<br>ceae           | g__Akker<br>mansia    | s__Akkerman<br>sia<br>sp001580195            |
| MGYG-HGUT-02387:s__Lactobacillus gasseri_A        | 0.0<br>63<br>27<br>90<br>98 | 0.4<br>96<br>53<br>01<br>46      | 0.8<br>57<br>21<br>13<br>2  | d_<br>_B<br>act<br>eri<br>a | p__Fi<br>rmicu<br>tes                | c__Ba<br>cilli                         | o__Lac<br>tobacill<br>ales          | f__Lact<br>obacilla<br>ceae          | g__Lactob<br>acillus  | s__Lactobacill<br>us gasseri_A               |



|                                                  |                             |                                  |                             |                             |                                 |                           |                            |                               |                               |                                         |
|--------------------------------------------------|-----------------------------|----------------------------------|-----------------------------|-----------------------------|---------------------------------|---------------------------|----------------------------|-------------------------------|-------------------------------|-----------------------------------------|
| MGYG-HGUT-02388:s__Lactobacillus_C paracasei     | 0.3<br>95<br>18<br>69<br>91 | -<br>0.2<br>35<br>64<br>68<br>39 | 0.9<br>39<br>70<br>92<br>5  | d_<br>_B<br>act<br>eri<br>a | p__Fi<br>rmicu<br>tes           | c__Ba<br>cilli            | o__Lac<br>tobacill<br>ales | f__Lact<br>obacilla<br>ceae   | g__Lactob<br>acillus_C        | s__Lactobacill<br>us_C<br>paracasei     |
| MGYG-HGUT-02393:s__Dorea faecis                  | 0.1<br>24<br>34<br>91<br>22 | -<br>0.4<br>26<br>12<br>24<br>79 | 0.8<br>91<br>82<br>55<br>59 | d_<br>_B<br>act<br>eri<br>a | p__Fi<br>rmicu<br>tes_A         | c__Clo<br>stridia         | o__Lac<br>hnospi<br>rales  | f__Lach<br>nospirac<br>eae    | g__Dorea                      | s__Dorea<br>faecis                      |
| MGYG-HGUT-02394:s__Prevotella sp001275135        | 0.5<br>66<br>50<br>90<br>14 | 0.1<br>60<br>41<br>51<br>56      | 0.9<br>71<br>33<br>90<br>3  | d_<br>_B<br>act<br>eri<br>a | p__B<br>acter<br>oidot<br>a     | c__Ba<br>cteroi<br>dia    | o__Bac<br>teroida<br>les   | f__Bact<br>eroidac<br>eae     | g__Prevot<br>ella             | s__Prevotella<br>sp001275135            |
| MGYG-HGUT-02395:s__Bifidobacterium adolescentis  | 0.5<br>95<br>36<br>11       | -<br>0.1<br>40<br>70<br>84<br>2  | 0.9<br>75<br>67<br>17<br>57 | d_<br>_B<br>act<br>eri<br>a | p__A<br>ctino<br>bacte<br>riota | c__Ac<br>tinoba<br>cteria | o__Act<br>inomyc<br>etales | f__Bifid<br>obacteri<br>aceae | g__Bifidob<br>acterium        | s__Bifidobact<br>erium<br>adolescentis  |
| MGYG-HGUT-02396:s__Bifidobacterium bifidum       | 0.3<br>52<br>75<br>98<br>87 | 0.2<br>53<br>81<br>10<br>99      | 0.9<br>39<br>70<br>92<br>5  | d_<br>_B<br>act<br>eri<br>a | p__A<br>ctino<br>bacte<br>riota | c__Ac<br>tinoba<br>cteria | o__Act<br>inomyc<br>etales | f__Bifid<br>obacteri<br>aceae | g__Bifidob<br>acterium        | s__Bifidobact<br>erium bifidum          |
| MGYG-HGUT-02397:s__Bifidobacterium angulatum     | 0.4<br>07<br>06<br>73<br>23 | 0.2<br>25<br>82<br>99<br>16      | 0.9<br>39<br>70<br>92<br>5  | d_<br>_B<br>act<br>eri<br>a | p__A<br>ctino<br>bacte<br>riota | c__Ac<br>tinoba<br>cteria | o__Act<br>inomyc<br>etales | f__Bifid<br>obacteri<br>aceae | g__Bifidob<br>acterium        | s__Bifidobact<br>erium<br>angulatum     |
| MGYG-HGUT-02410:s__Provencibacterium massiliense | 0.7<br>42<br>40<br>83<br>36 | 0.0<br>81<br>83<br>81<br>58      | 0.9<br>79<br>45<br>84<br>75 | d_<br>_B<br>act<br>eri<br>a | p__Fi<br>rmicu<br>tes_A         | c__Clo<br>stridia         | o__Os<br>cillospi<br>rales | f__Rumi<br>nococca<br>ceae    | g__Proven<br>cibacteriu<br>m  | s__Provencib<br>acterium<br>massiliense |
| MGYG-HGUT-02412:s__Prevotellamassilia timonensis | 0.4<br>97<br>51<br>37       | 0.1<br>86<br>45<br>47<br>71      | 0.9<br>68<br>53<br>20<br>73 | d_<br>_B<br>act<br>eri<br>a | p__B<br>acter<br>oidot<br>a     | c__Ba<br>cteroi<br>dia    | o__Bac<br>teroida<br>les   | f__Bact<br>eroidac<br>eae     | g__Prevot<br>ellamassili<br>a | s__Prevotella<br>massilia<br>timonensis |
| MGYG-HGUT-02416:s__An200 sp003268275             | 0.6<br>46<br>98<br>27<br>79 | 0.1<br>27<br>44<br>92<br>85      | 0.9<br>75<br>67<br>17<br>57 | d_<br>_B<br>act<br>eri<br>a | p__Fi<br>rmicu<br>tes_A         | c__Clo<br>stridia         | o__Os<br>cillospi<br>rales | f__Acut<br>alibacte<br>raceae | g__An200                      | s__An200<br>sp003268275                 |

|                                                       |                             |                                  |                             |                             |                                 |                           |                                   |                                          |                                   |                                              |
|-------------------------------------------------------|-----------------------------|----------------------------------|-----------------------------|-----------------------------|---------------------------------|---------------------------|-----------------------------------|------------------------------------------|-----------------------------------|----------------------------------------------|
| MGYG-HGUT-02417:s__Lachnoclostridium_A edouardi       | 0.1<br>91<br>98<br>41<br>62 | 0.3<br>62<br>93<br>68<br>3       | 0.8<br>91<br>82<br>55<br>59 | d_<br>_B<br>act<br>eri<br>a | p__Fi<br>rmicu<br>tes_A         | c__Clo<br>stridia         | o__Lac<br>hnospi<br>rales         | f__Lach<br>nospirac<br>eae               | g__Lachno<br>clostridiu<br>m_A    | s__Lachnoclo<br>stridium_A<br>edouardi       |
| MGYG-HGUT-02418:s__Parabacteroides chinchillae        | 0.2<br>46<br>64<br>21<br>42 | -<br>0.3<br>08<br>69<br>31<br>84 | 0.9<br>02<br>18<br>13<br>67 | d_<br>_B<br>act<br>eri<br>a | p__B<br>acter<br>oidot<br>a     | c__Ba<br>cteroi<br>dia    | o__Bac<br>teroida<br>les          | f__Tann<br>erellace<br>ae                | g__Paraba<br>cteroides            | s__Parabacte<br>roides<br>chinchillae        |
| MGYG-HGUT-02424:s__Monoglobus pectinilyticus          | 0.8<br>06<br>09<br>58<br>52 | 0.0<br>69<br>00<br>29<br>98      | 0.9<br>87<br>14<br>23<br>02 | d_<br>_B<br>act<br>eri<br>a | p__Fi<br>rmicu<br>tes_A         | c__Clo<br>stridia         | o__Mo<br>noglob<br>ales           | f__Mon<br>oglobac<br>eae                 | g__Monog<br>lobus                 | s__Monoglob<br>us<br>pectinilyticus          |
| MGYG-HGUT-02437:s__Blautia hominis                    | 0.2<br>99<br>27<br>16<br>26 | -<br>0.2<br>88<br>93<br>01<br>5  | 0.9<br>29<br>02<br>59<br>13 | d_<br>_B<br>act<br>eri<br>a | p__Fi<br>rmicu<br>tes_A         | c__Clo<br>stridia         | o__Lac<br>hnospi<br>rales         | f__Lach<br>nospirac<br>eae               | g__Blautia                        | s__Blautia<br>hominis                        |
| MGYG-HGUT-02438:s__Parabacteroides distasonis         | 0.0<br>63<br>40<br>74<br>82 | -<br>0.5<br>00<br>04<br>10<br>96 | 0.8<br>57<br>21<br>13<br>2  | d_<br>_B<br>act<br>eri<br>a | p__B<br>acter<br>oidot<br>a     | c__Ba<br>cteroi<br>dia    | o__Bac<br>teroida<br>les          | f__Tann<br>erellace<br>ae                | g__Paraba<br>cteroides            | s__Parabacte<br>roides<br>distasonis         |
| MGYG-HGUT-02439:s__CHH4-2 sp002899675                 | 0.5<br>01<br>01<br>47<br>1  | -<br>0.1<br>85<br>37<br>40<br>09 | 0.9<br>68<br>53<br>20<br>73 | d_<br>_B<br>act<br>eri<br>a | p__Fi<br>rmicu<br>tes_A         | c__Clo<br>stridia         | o__Lac<br>hnospi<br>rales         | f__Lach<br>nospirac<br>eae               | g__CHH4-<br>2                     | s__CHH4-2<br>sp002899675                     |
| MGYG-HGUT-02442:s__Gordonibacter unknown              | 0.4<br>63<br>06<br>51<br>99 | 0.2<br>05<br>70<br>34<br>81      | 0.9<br>65<br>57<br>46<br>92 | d_<br>_B<br>act<br>eri<br>a | p__A<br>ctino<br>bacte<br>riota | c__Co<br>riobac<br>teriia | o__Cor<br>iobact<br>eriales       | f__Egge<br>rthellac<br>eae               | g__Gordo<br>nibacter              | s__Gordoniba<br>cter unknown                 |
| MGYG-HGUT-02444:s__Erysipelatoclostridium sp003024675 | 0.9<br>62<br>05<br>56<br>27 | -<br>0.0<br>13<br>33<br>69<br>1  | 0.9<br>94<br>47<br>94<br>74 | d_<br>_B<br>act<br>eri<br>a | p__Fi<br>rmicu<br>tes           | c__Ba<br>cilli            | o__Ery<br>sipelot<br>richale<br>s | f__Erysi<br>pelatocl<br>ostridia<br>ceae | g__Erysipe<br>latoclostri<br>dium | s__Erysipelat<br>oclostridium<br>sp003024675 |
| MGYG-HGUT-02445:s__Clostridium                        | 0.6<br>35<br>23             | 0.1<br>29<br>41                  | 0.9<br>75<br>67             | d_<br>_B<br>act             | p__Fi<br>rmicu<br>tes_A         | c__Clo<br>stridia         | o__Lac<br>hnospi<br>rales         | f__Lach<br>nospirac<br>eae               | g__Clostri<br>dium_Q              | s__Clostridiu<br>m_Q<br>sp003024715          |

|                                                               |                             |                                  |                             |                             |                                      |                                 |                                   |                                    |                                 |                                            |
|---------------------------------------------------------------|-----------------------------|----------------------------------|-----------------------------|-----------------------------|--------------------------------------|---------------------------------|-----------------------------------|------------------------------------|---------------------------------|--------------------------------------------|
| um_Q<br>sp003024715                                           | 40<br>65                    | 94<br>3                          | 17<br>57                    | eri<br>a                    |                                      |                                 |                                   |                                    |                                 |                                            |
| MGYG-HGUT-<br>02446:s__Methano<br>brevibacter_A<br>smithii_A  | 0.1<br>52<br>62<br>43<br>23 | -<br>0.3<br>77<br>61<br>28<br>26 | 0.8<br>91<br>82<br>55<br>59 | d_<br>_A<br>rc<br>ha<br>ea  | p__E<br>uryar<br>chaeo<br>ta         | c__M<br>ethan<br>obact<br>eria  | o__Me<br>thanob<br>acteria<br>les | f__Met<br>hanoba<br>cteriace<br>ae | g__Metha<br>nobreviba<br>cter_A | s__Methanob<br>revibacter_A<br>smithii_A   |
| MGYG-HGUT-<br>02448:s__Ruminicl<br>ostridium_C<br>sp000435295 | 0.5<br>33<br>20<br>19<br>3  | -<br>0.1<br>69<br>23<br>09<br>99 | 0.9<br>68<br>53<br>20<br>73 | d_<br>_B<br>act<br>eri<br>a | p__Fi<br>rmicu<br>tes_A              | c__Clo<br>stridia               | o__Os<br>cillospi<br>rales        | f__Oscil<br>lospirac<br>eae        | g__Rumini<br>clostridiu<br>m_C  | s__Ruminiclo<br>stridium_C<br>sp000435295  |
| MGYG-HGUT-<br>02449:s__Parabact<br>eroides<br>unknown_10      | 0.2<br>04<br>82<br>52<br>11 | -<br>0.3<br>53<br>19<br>75<br>59 | 0.8<br>91<br>82<br>55<br>59 | d_<br>_B<br>act<br>eri<br>a | p__B<br>acter<br>oidot<br>a          | c__Ba<br>cteroi<br>dia          | o__Bac<br>teroida<br>les          | f__Tann<br>erellace<br>ae          | g__Paraba<br>cteroides          | s__Parabacte<br>roides<br>unknown_10       |
| MGYG-HGUT-<br>02450:s__Olsenella<br>_E unknown_1              | 0.9<br>23<br>38<br>46<br>55 | 0.0<br>26<br>72<br>13<br>82      | 0.9<br>94<br>47<br>94<br>74 | d_<br>_B<br>act<br>eri<br>a | p__A<br>ctino<br>bacte<br>riota      | c__Co<br>riobac<br>teriia       | o__Cor<br>iobact<br>eriales       | f__Atop<br>obiacea<br>e            | g__Olsenel<br>la_E              | s__Olsenella_<br>E unknown_1               |
| MGYG-HGUT-<br>02453:s__Akkerman<br>sia muciniphila_B          | 0.8<br>64<br>97<br>96<br>6  | 0.0<br>46<br>85<br>20<br>64      | 0.9<br>94<br>47<br>94<br>74 | d_<br>_B<br>act<br>eri<br>a | p__V<br>erruc<br>omicr<br>obiot<br>a | c__Ve<br>rruco<br>micro<br>biae | o__Ver<br>rucomi<br>crobial<br>es | f__Akke<br>rmansia<br>ceae         | g__Akker<br>mansia              | s__Akkerman<br>sia<br>muciniphila_B        |
| MGYG-HGUT-<br>02454:s__Akkerman<br>sia muciniphila            | 0.7<br>14<br>39<br>60<br>99 | -<br>0.0<br>98<br>22<br>86<br>64 | 0.9<br>79<br>45<br>84<br>75 | d_<br>_B<br>act<br>eri<br>a | p__V<br>erruc<br>omicr<br>obiot<br>a | c__Ve<br>rruco<br>micro<br>biae | o__Ver<br>rucomi<br>crobial<br>es | f__Akke<br>rmansia<br>ceae         | g__Akker<br>mansia              | s__Akkerman<br>sia<br>muciniphila          |
| MGYG-HGUT-<br>02455:s__Bacteroi<br>des cellulosityticus       | 0.1<br>44<br>29<br>58<br>26 | -<br>0.4<br>03<br>49<br>02<br>94 | 0.8<br>91<br>82<br>55<br>59 | d_<br>_B<br>act<br>eri<br>a | p__B<br>acter<br>oidot<br>a          | c__Ba<br>cteroi<br>dia          | o__Bac<br>teroida<br>les          | f__Bact<br>eroidac<br>eae          | g__Bacter<br>oides              | s__Bacteroi<br>des<br>cellulosityticu<br>s |
| MGYG-HGUT-<br>02459:s__Bifidoba<br>cterium animalis           | 0.9<br>38<br>62<br>10<br>76 | 0.0<br>21<br>60<br>96<br>47      | 0.9<br>94<br>47<br>94<br>74 | d_<br>_B<br>act<br>eri<br>a | p__A<br>ctino<br>bacte<br>riota      | c__Ac<br>tinoba<br>cteria       | o__Act<br>inomyc<br>etales        | f__Bifid<br>obacteri<br>aceae      | g__Bifidob<br>acterium          | s__Bifidobact<br>erium<br>animalis         |

|                                                    |                             |                                  |                             |                             |                                 |                                        |                             |                                |                        |                                            |
|----------------------------------------------------|-----------------------------|----------------------------------|-----------------------------|-----------------------------|---------------------------------|----------------------------------------|-----------------------------|--------------------------------|------------------------|--------------------------------------------|
| MGYG-HGUT-02464:s__Acetivbrio_A<br>ethanolgignens  | 0.7<br>75<br>79<br>55<br>38 | -<br>0.0<br>78<br>71<br>71<br>19 | 0.9<br>79<br>52<br>04<br>84 | d_<br>_B<br>act<br>eri<br>a | p__Fi<br>rmicu<br>tes_A         | c__Clo<br>stridia                      | o__Lac<br>hnospi<br>rales   | f__Lach<br>nospi<br>rac<br>eae | g__Acetivi<br>brio_A   | s__Acetivbrio<br>_A<br>ethanolgign<br>ens  |
| MGYG-HGUT-02469:s__Bifidobacterium breve           | 0.7<br>79<br>69<br>77<br>6  | -<br>0.0<br>76<br>89<br>54<br>57 | 0.9<br>79<br>52<br>04<br>84 | d_<br>_B<br>act<br>eri<br>a | p__A<br>ctino<br>bacte<br>riota | c__Ac<br>tinoba<br>cteria              | o__Act<br>inomyc<br>etales  | f__Bifid<br>obacteri<br>aceae  | g__Bifidob<br>acterium | s__Bifidobact<br>erium breve               |
| MGYG-HGUT-02470:s__Bacteroides intestinalis        | 0.8<br>74<br>17<br>33<br>65 | -<br>0.0<br>42<br>81<br>40<br>03 | 0.9<br>94<br>47<br>94<br>74 | d_<br>_B<br>act<br>eri<br>a | p__B<br>acter<br>oidot<br>a     | c__Ba<br>cteroi<br>dia                 | o__Bac<br>teroida<br>les    | f__Bact<br>eroidac<br>eae      | g__Bacter<br>oides     | s__Bacteroides<br>intestinalis             |
| MGYG-HGUT-02475:s__Lactonifactor longoviformis     | 0.1<br>25<br>18<br>05<br>93 | -<br>0.4<br>24<br>19<br>53<br>4  | 0.8<br>91<br>82<br>55<br>59 | d_<br>_B<br>act<br>eri<br>a | p__Fi<br>rmicu<br>tes_A         | c__Clo<br>stridia                      | o__Lac<br>hnospi<br>rales   | f__Lach<br>nospi<br>rac<br>eae | g__Lactoni<br>factor   | s__Lactonifac<br>tor<br>longoviformis      |
| MGYG-HGUT-02477:s__Citrobacter_A<br>amalonaticus_D | 0.9<br>36<br>53<br>96<br>64 | 0.0<br>21<br>99<br>27<br>07      | 0.9<br>94<br>47<br>94<br>74 | d_<br>_B<br>act<br>eri<br>a | p__Pr<br>oteob<br>acteri<br>a   | c__Ga<br>mmap<br>roteo<br>bacter<br>ia | o__Ent<br>erobac<br>terales | f__Ente<br>robacte<br>riaceae  | g__Citroba<br>cter_A   | s__Citrobacte<br>r_A<br>amalonaticus<br>_D |
| MGYG-HGUT-02478:s__Bacteroides_B dorei             | 0.3<br>71<br>00<br>62<br>48 | 0.2<br>48<br>68<br>33<br>54      | 0.9<br>39<br>70<br>92<br>5  | d_<br>_B<br>act<br>eri<br>a | p__B<br>acter<br>oidot<br>a     | c__Ba<br>cteroi<br>dia                 | o__Bac<br>teroida<br>les    | f__Bact<br>eroidac<br>eae      | g__Bacter<br>oides_B   | s__Bacteroides<br>_B dorei                 |
| MGYG-HGUT-02480:s__Adlercreutzia equolifaciens     | 0.3<br>03<br>38<br>14<br>94 | -<br>0.2<br>78<br>87<br>16<br>44 | 0.9<br>29<br>02<br>59<br>13 | d_<br>_B<br>act<br>eri<br>a | p__A<br>ctino<br>bacte<br>riota | c__Co<br>riobac<br>teriia              | o__Cor<br>iobact<br>eriales | f__Egge<br>rthellac<br>eae     | g__Adlercr<br>eutzia   | s__Adlercreut<br>zia<br>equolifaciens      |
| MGYG-HGUT-02482:s__Ruminococcus_E bromii           | 0.4<br>34<br>66<br>90<br>22 | 0.2<br>15<br>66<br>24<br>57      | 0.9<br>50<br>80<br>65<br>94 | d_<br>_B<br>act<br>eri<br>a | p__Fi<br>rmicu<br>tes_A         | c__Clo<br>stridia                      | o__Os<br>cillospi<br>rales  | f__Acut<br>alibacte<br>raceae  | g__Rumin<br>ococcus_E  | s__Ruminoco<br>ccus_E bromii               |
| MGYG-HGUT-02483:s__Clostridium                     | 0.5<br>77<br>77             | 0.1<br>54<br>81                  | 0.9<br>75<br>67             | d_<br>_B<br>act             | p__Fi<br>rmicu<br>tes_A         | c__Clo<br>stridia                      | o__Lac<br>hnospi<br>rales   | f__Lach<br>nospi<br>rac<br>eae | g__Clostri<br>dium_Q   | s__Clostridiu<br>m_Q                       |

|                                                      |                             |                                  |                             |                             |                                 |                                        |                             |                               |                      |                                     |                     |
|------------------------------------------------------|-----------------------------|----------------------------------|-----------------------------|-----------------------------|---------------------------------|----------------------------------------|-----------------------------|-------------------------------|----------------------|-------------------------------------|---------------------|
| um_Q<br>saccharolyticum                              | 79<br>6                     | 59<br>41                         | 17<br>57                    | eri<br>a                    |                                 |                                        |                             |                               |                      |                                     | saccharolyticu<br>m |
| MGYG-HGUT-<br>02487:s__Gordoni<br>bacter pamelaeeae  | 0.7<br>61<br>89<br>65<br>74 | 0.0<br>84<br>63<br>66<br>94      | 0.9<br>79<br>45<br>84<br>75 | d_<br>_B<br>act<br>eri<br>a | p__A<br>ctino<br>bacte<br>riota | c__Co<br>riobac<br>teriia              | o__Cor<br>iobact<br>eriales | f__Egge<br>rthellac<br>eae    | g__Gordo<br>nibacter | s__Gordoniba<br>cter<br>pamelaeeae  |                     |
| MGYG-HGUT-<br>02491:s__Kluyvera<br>ascorbata_B       | 0.9<br>38<br>77<br>04<br>37 | -<br>0.0<br>21<br>00<br>93<br>2  | 0.9<br>94<br>47<br>94<br>74 | d_<br>_B<br>act<br>eri<br>a | p__Pr<br>oteob<br>acteri<br>a   | c__Ga<br>mmap<br>roteo<br>bacter<br>ia | o__Ent<br>erobac<br>terales | f__Ente<br>robacte<br>riaceae | g__Kluyver<br>a      | s__Kluyvera<br>ascorbata_B          |                     |
| MGYG-HGUT-<br>02492:s__Agathob<br>acter rectalis     | 0.9<br>91<br>42<br>71<br>57 | -<br>0.0<br>02<br>73<br>04<br>79 | 0.9<br>98<br>80<br>33<br>46 | d_<br>_B<br>act<br>eri<br>a | p__Fi<br>rmicu<br>tes_A         | c__Clo<br>stridia                      | o__Lac<br>hnospi<br>rales   | f__Lach<br>nospi rac<br>eae   | g__Agatho<br>bacter  | s__Agathobac<br>ter rectalis        |                     |
| MGYG-HGUT-<br>02494:s__Citrobact<br>er_B koseri      | 0.7<br>70<br>53<br>40<br>26 | 0.0<br>80<br>73<br>55<br>69      | 0.9<br>79<br>52<br>04<br>84 | d_<br>_B<br>act<br>eri<br>a | p__Pr<br>oteob<br>acteri<br>a   | c__Ga<br>mmap<br>roteo<br>bacter<br>ia | o__Ent<br>erobac<br>terales | f__Ente<br>robacte<br>riaceae | g__Citroba<br>cter_B | s__Citrobacte<br>r_B koseri         |                     |
| MGYG-HGUT-<br>02500:s__Enteroba<br>cter cloacae      | 0.2<br>89<br>03<br>62<br>49 | -<br>0.2<br>86<br>94<br>00<br>79 | 0.9<br>29<br>02<br>59<br>13 | d_<br>_B<br>act<br>eri<br>a | p__Pr<br>oteob<br>acteri<br>a   | c__Ga<br>mmap<br>roteo<br>bacter<br>ia | o__Ent<br>erobac<br>terales | f__Ente<br>robacte<br>riaceae | g__Entero<br>bacter  | s__Enterobac<br>ter cloacae         |                     |
| MGYG-HGUT-<br>02504:s__Enteroba<br>cter himalayensis | 0.8<br>65<br>67<br>40<br>48 | 0.0<br>43<br>95<br>67<br>29      | 0.9<br>94<br>47<br>94<br>74 | d_<br>_B<br>act<br>eri<br>a | p__Pr<br>oteob<br>acteri<br>a   | c__Ga<br>mmap<br>roteo<br>bacter<br>ia | o__Ent<br>erobac<br>terales | f__Ente<br>robacte<br>riaceae | g__Entero<br>bacter  | s__Enterobac<br>ter<br>himalayensis |                     |
| MGYG-HGUT-<br>02506:s__Escheric<br>hia coli_D        | 0.8<br>06<br>40<br>45<br>11 | -<br>0.0<br>67<br>07<br>80<br>11 | 0.9<br>87<br>14<br>23<br>02 | d_<br>_B<br>act<br>eri<br>a | p__Pr<br>oteob<br>acteri<br>a   | c__Ga<br>mmap<br>roteo<br>bacter<br>ia | o__Ent<br>erobac<br>terales | f__Ente<br>robacte<br>riaceae | g__Escheri<br>chia   | s__Escherichi<br>a coli_D           |                     |
| MGYG-HGUT-<br>02507:s__Escheric<br>hia albertii      | 0.9<br>33<br>77<br>57<br>6  | 0.0<br>22<br>40<br>82<br>63      | 0.9<br>94<br>47<br>94<br>74 | d_<br>_B<br>act<br>eri<br>a | p__Pr<br>oteob<br>acteri<br>a   | c__Ga<br>mmap<br>roteo<br>bacter<br>ia | o__Ent<br>erobac<br>terales | f__Ente<br>robacte<br>riaceae | g__Escheri<br>chia   | s__Escherichi<br>a albertii         |                     |

|                                               |                             |                                  |                             |                             |                                 |                                        |                                   |                                |                        |                                      |
|-----------------------------------------------|-----------------------------|----------------------------------|-----------------------------|-----------------------------|---------------------------------|----------------------------------------|-----------------------------------|--------------------------------|------------------------|--------------------------------------|
| MGYG-HGUT-02509:s__Slackia_A unknown_3        | 0.4<br>49<br>64<br>32<br>21 | 0.2<br>06<br>67<br>26<br>42      | 0.9<br>61<br>29<br>22<br>08 | d_<br>_B<br>act<br>eri<br>a | p__A<br>ctino<br>bacte<br>riota | c__Co<br>riobac<br>teriia              | o__Cor<br>iobact<br>eriales       | f__Egge<br>rthellac<br>eae     | g__Slackia<br>_A       | s__Slackia_A<br>unknown_3            |
| MGYG-HGUT-02510:s__Klebsiella quasipneumoniae | 0.0<br>94<br>20<br>90<br>45 | 0.4<br>37<br>94<br>27<br>38      | 0.8<br>83<br>30<br>72<br>56 | d_<br>_B<br>act<br>eri<br>a | p__Pr<br>oteob<br>acteri<br>a   | c__Ga<br>mmap<br>roteo<br>bacter<br>ia | o__Ent<br>erobac<br>terales       | f__Ente<br>robacte<br>riaceae  | g__Klebsie<br>lla      | s__Klebsiella<br>quasipneumo<br>niae |
| MGYG-HGUT-02511:s__Klebsiella variicola       | 0.7<br>32<br>55<br>03<br>81 | 0.0<br>87<br>17<br>39<br>91      | 0.9<br>79<br>45<br>84<br>75 | d_<br>_B<br>act<br>eri<br>a | p__Pr<br>oteob<br>acteri<br>a   | c__Ga<br>mmap<br>roteo<br>bacter<br>ia | o__Ent<br>erobac<br>terales       | f__Ente<br>robacte<br>riaceae  | g__Klebsie<br>lla      | s__Klebsiella<br>variicola           |
| MGYG-HGUT-02515:s__Escherichia fergusonii     | 0.4<br>82<br>10<br>18<br>33 | -<br>0.1<br>90<br>35<br>49<br>65 | 0.9<br>68<br>53<br>20<br>73 | d_<br>_B<br>act<br>eri<br>a | p__Pr<br>oteob<br>acteri<br>a   | c__Ga<br>mmap<br>roteo<br>bacter<br>ia | o__Ent<br>erobac<br>terales       | f__Ente<br>robacte<br>riaceae  | g__Escheri<br>chia     | s__Escherichi<br>a fergusonii        |
| MGYG-HGUT-02517:s__Roseburia hominis          | 0.2<br>86<br>20<br>58<br>77 | 0.2<br>89<br>82<br>87<br>68      | 0.9<br>29<br>02<br>59<br>13 | d_<br>_B<br>act<br>eri<br>a | p__Fi<br>rmicu<br>tes_A         | c__Clo<br>stridia                      | o__Lac<br>hnospi<br>rales         | f__Lach<br>nospi<br>rac<br>eae | g__Rosebu<br>ria       | s__Roseburia<br>hominis              |
| MGYG-HGUT-02519:s__Enterobacter sesami        | 0.9<br>66<br>51<br>38<br>51 | 0.0<br>11<br>69<br>55<br>93      | 0.9<br>94<br>47<br>94<br>74 | d_<br>_B<br>act<br>eri<br>a | p__Pr<br>oteob<br>acteri<br>a   | c__Ga<br>mmap<br>roteo<br>bacter<br>ia | o__Ent<br>erobac<br>terales       | f__Ente<br>robacte<br>riaceae  | g__Entero<br>bacter    | s__Enterobac<br>ter sesami           |
| MGYG-HGUT-02521:s__Metakosakonia intermedia   | 0.8<br>15<br>49<br>71<br>28 | -<br>0.0<br>62<br>68<br>03<br>45 | 0.9<br>87<br>66<br>45<br>39 | d_<br>_B<br>act<br>eri<br>a | p__Pr<br>oteob<br>acteri<br>a   | c__Ga<br>mmap<br>roteo<br>bacter<br>ia | o__Ent<br>erobac<br>terales       | f__Ente<br>robacte<br>riaceae  | g__Metak<br>osakonia   | s__Metakosa<br>konia<br>intermedia   |
| MGYG-HGUT-02523:s__Christensenella minuta     | 0.5<br>63<br>25<br>62<br>44 | 0.1<br>59<br>13<br>70<br>04      | 0.9<br>71<br>33<br>90<br>3  | d_<br>_B<br>act<br>eri<br>a | p__Fi<br>rmicu<br>tes_A         | c__Clo<br>stridia                      | o__Chr<br>istense<br>nellale<br>s | f__Chris<br>tensene<br>llaceae | g__Christe<br>nsenella | s__Christense<br>nella minuta        |
| MGYG-HGUT-02528:s__Anaerostipes hadrus        | 0.6<br>89<br>96<br>10<br>64 | 0.1<br>07<br>08<br>51<br>6       | 0.9<br>75<br>76<br>85<br>79 | d_<br>_B<br>act<br>eri<br>a | p__Fi<br>rmicu<br>tes_A         | c__Clo<br>stridia                      | o__Lac<br>hnospi<br>rales         | f__Lach<br>nospi<br>rac<br>eae | g__Anaero<br>stipes    | s__Anaerosti<br>pes hadrus           |

|                                                   |             |              |             |             |                   |                        |                     |                       |                        |                                   |
|---------------------------------------------------|-------------|--------------|-------------|-------------|-------------------|------------------------|---------------------|-----------------------|------------------------|-----------------------------------|
| MGYG-HGUT-02530:s__Ruminiclostridium_Esiraeum     | 0.5095845   | 0.174058297  | 0.968532073 | d__Bacteria | p__Firmicutes_A   | c__Clostridia          | o__Oscillospirales  | f__Ruminococcales     | g__Ruminiclostridium_E | s__Ruminiclostridium_Esiraeum     |
| MGYG-HGUT-02534:s__Citrobacter_A_farmeri          | 0.9208734   | 0.026986672  | 0.994479474 | d__Bacteria | p__Proteobacteria | c__Gammaproteobacteria | o__Enterobacterales | f__Enterobacteriaceae | g__Citrobacter_A       | s__Citrobacter_A_farmeri          |
| MGYG-HGUT-02538:s__Klebsiella_pneumoniae          | 0.7088204   | -0.093458479 | 0.979458475 | d__Bacteria | p__Proteobacteria | c__Gammaproteobacteria | o__Enterobacterales | f__Enterobacteriaceae | g__Klebsiella          | s__Klebsiella_pneumoniae          |
| MGYG-HGUT-02539:s__Collinsella_aerofaciens_A_1    | 0.50976059  | 0.183497973  | 0.968532073 | d__Bacteria | p__Actinobacteria | c__Coriobacteriia      | o__Coriobacteriales | f__Coriobacteriaceae  | g__Collinsella         | s__Collinsella_aerofaciens_A_1    |
| MGYG-HGUT-02540:s__Paraprevotella_clara           | 0.815148982 | -0.065304539 | 0.987664539 | d__Bacteria | p__Bacteroidota   | c__Bacteroidia         | o__Bacteroidales    | f__Bacteroidaceae     | g__Paraprevotella      | s__Paraprevotella_clara           |
| MGYG-HGUT-02544:s__Eggerthella_lenta              | 0.678715122 | -0.115438453 | 0.975671757 | d__Bacteria | p__Actinobacteria | c__Coriobacteriia      | o__Coriobacteriales | f__Eggerthellaceae    | g__Eggerthella         | s__Eggerthella_lenta              |
| MGYG-HGUT-02545:s__Faecalibacterium_prausnitzii_G | 0.399583458 | 0.236136604  | 0.939709205 | d__Bacteria | p__Firmicutes_A   | c__Clostridia          | o__Oscillospirales  | f__Ruminococcales     | g__Faecalibacterium    | s__Faecalibacterium_prausnitzii_G |
| MGYG-HGUT-02546:s__Neobitarella_massiliensis      | 0.45788932  | 0.208249966  | 0.965574692 | d__Bacteria | p__Firmicutes_A   | c__Clostridia          | o__Oscillospirales  | f__Ruminococcales     | g__Neobitarella        | s__Neobitarella_massiliensis      |
| MGYG-HGUT-02547:s__Megasphaera_elsdenii           | 0.728633193 | 0.095044269  | 0.979458475 | d__Bacteria | p__Firmicutes_C   | c__Negativicutes       | o__Veillonellales   | f__Megasphaeraeaceae  | g__Megasphaera         | s__Megasphaera_elsdenii           |

|                                              |                             |                                  |                             |                             |                                 |                           |                             |                              |                      |                                     |
|----------------------------------------------|-----------------------------|----------------------------------|-----------------------------|-----------------------------|---------------------------------|---------------------------|-----------------------------|------------------------------|----------------------|-------------------------------------|
| MGYG-HGUT-02549:s__Bacteroides caccae        | 0.2<br>13<br>32<br>17<br>38 | -<br>0.3<br>46<br>69<br>09<br>31 | 0.8<br>91<br>82<br>55<br>59 | d_<br>_B<br>act<br>eri<br>a | p__B<br>acter<br>oidot<br>a     | c__Ba<br>cteroi<br>dia    | o__Bac<br>teroida<br>les    | f__Bact<br>eroidac<br>eae    | g__Bacter<br>oides   | s__Bacteroides<br>caccae            |
| MGYG-HGUT-02550:s__Streptococcus sp001556435 | 0.6<br>05<br>40<br>97<br>72 | 0.1<br>44<br>55<br>99<br>28      | 0.9<br>75<br>67<br>17<br>57 | d_<br>_B<br>act<br>eri<br>a | p__Fi<br>rmicu<br>tes           | c__Ba<br>cilli            | o__Lac<br>tobacill<br>ales  | f__Stre<br>ptococc<br>aceae  | g__Strepto<br>coccus | s__Streptococ<br>cus<br>sp001556435 |
| MGYG-HGUT-02552:s__Lachnospira sp000436535   | 0.9<br>60<br>36<br>26<br>27 | 0.0<br>13<br>74<br>34<br>81      | 0.9<br>94<br>47<br>94<br>74 | d_<br>_B<br>act<br>eri<br>a | p__Fi<br>rmicu<br>tes_A         | c__Clo<br>stridia         | o__Lac<br>hnospi<br>rales   | f__Lach<br>nospirac<br>eae   | g__Lachno<br>spira   | s__Lachnospir<br>a<br>sp000436535   |
| MGYG-HGUT-02554:s__Streptococcus oralis_AE   | 0.0<br>43<br>60<br>05       | 0.5<br>53<br>97<br>70<br>19      | 0.7<br>79<br>32<br>10<br>52 | d_<br>_B<br>act<br>eri<br>a | p__Fi<br>rmicu<br>tes           | c__Ba<br>cilli            | o__Lac<br>tobacill<br>ales  | f__Stre<br>ptococc<br>aceae  | g__Strepto<br>coccus | s__Streptococ<br>cus oralis_AE      |
| MGYG-HGUT-02556:s__CAG-279 sp000437795       | 0.7<br>50<br>57<br>49<br>65 | 0.0<br>89<br>01<br>52<br>1       | 0.9<br>79<br>45<br>84<br>75 | d_<br>_B<br>act<br>eri<br>a | p__B<br>acter<br>oidot<br>a     | c__Ba<br>cteroi<br>dia    | o__Bac<br>teroida<br>les    | f__Muri<br>baculac<br>eae    | g__CAG-<br>279       | s__CAG-279<br>sp000437795           |
| MGYG-HGUT-02557:s__Collinsella unknown_217   | 0.7<br>94<br>78<br>16<br>28 | -<br>0.0<br>72<br>77<br>42<br>08 | 0.9<br>82<br>96<br>63       | d_<br>_B<br>act<br>eri<br>a | p__A<br>ctino<br>bacte<br>riota | c__Co<br>riobac<br>teriia | o__Cor<br>iobact<br>eriales | f__Cori<br>obacteri<br>aceae | g__Collins<br>ella   | s__Collinsella<br>unknown_21<br>7   |
| MGYG-HGUT-02559:s__Lachnospira unknown_3     | 0.7<br>18<br>07<br>12<br>97 | 0.0<br>99<br>78<br>28<br>92      | 0.9<br>79<br>45<br>84<br>75 | d_<br>_B<br>act<br>eri<br>a | p__Fi<br>rmicu<br>tes_A         | c__Clo<br>stridia         | o__Lac<br>hnospi<br>rales   | f__Lach<br>nospirac<br>eae   | g__Lachno<br>spira   | s__Lachnospir<br>a unknown_3        |
| MGYG-HGUT-02560:s__Bacteroides_B unknown     | 0.1<br>49<br>96<br>84<br>08 | 0.3<br>98<br>86<br>41<br>45      | 0.8<br>91<br>82<br>55<br>59 | d_<br>_B<br>act<br>eri<br>a | p__B<br>acter<br>oidot<br>a     | c__Ba<br>cteroi<br>dia    | o__Bac<br>teroida<br>les    | f__Bact<br>eroidac<br>eae    | g__Bacter<br>oides_B | s__Bacteroides<br>s_B unknown       |
| MGYG-HGUT-02561:s__Bacteroides unknown_5     | 0.7<br>13<br>63<br>62<br>77 | 0.1<br>02<br>56<br>54<br>63      | 0.9<br>79<br>45<br>84<br>75 | d_<br>_B<br>act<br>eri<br>a | p__B<br>acter<br>oidot<br>a     | c__Ba<br>cteroi<br>dia    | o__Bac<br>teroida<br>les    | f__Bact<br>eroidac<br>eae    | g__Bacter<br>oides   | s__Bacteroides<br>s unknown_5       |



|                                                     |                             |                                  |                             |                             |                               |                         |                                     |                               |                                  |                                               |
|-----------------------------------------------------|-----------------------------|----------------------------------|-----------------------------|-----------------------------|-------------------------------|-------------------------|-------------------------------------|-------------------------------|----------------------------------|-----------------------------------------------|
| MGYG-HGUT-02563:s__Romboutsia timonensis            | 0.7<br>51<br>60<br>89<br>94 | -<br>0.0<br>88<br>63<br>52<br>46 | 0.9<br>79<br>45<br>84<br>75 | d_<br>_B<br>act<br>eri<br>a | p__Fi<br>rmicu<br>tes_A       | c__Clo<br>stridia       | o__Pe<br>ptostre<br>ptococ<br>cales | f__Pept<br>ostrept<br>ococcae | g__Rombo<br>utsia                | s__Romboutsia<br>timonensis                   |
| MGYG-HGUT-02570:s__Ruminococcus_E sp003526955       | 0.8<br>28<br>27<br>86<br>75 | -<br>0.0<br>60<br>14<br>43<br>54 | 0.9<br>92<br>22<br>01<br>9  | d_<br>_B<br>act<br>eri<br>a | p__Fi<br>rmicu<br>tes_A       | c__Clo<br>stridia       | o__Os<br>cillospi<br>rales          | f__Acut<br>alibacte<br>raceae | g__Rumin<br>ococcus_E            | s__Ruminoco<br>ccus_E<br>sp003526955          |
| MGYG-HGUT-02573:s__Ruminococcus_C unknown_2         | 0.9<br>48<br>21<br>50<br>94 | 0.0<br>18<br>11<br>29<br>88      | 0.9<br>94<br>47<br>94<br>74 | d_<br>_B<br>act<br>eri<br>a | p__Fi<br>rmicu<br>tes_A       | c__Clo<br>stridia       | o__Os<br>cillospi<br>rales          | f__Rumi<br>nococca<br>ceae    | g__Rumin<br>ococcus_C            | s__Ruminoco<br>ccus_C<br>unknown_2            |
| MGYG-HGUT-02574:s__Fusobacterium_A unknown_2        | 0.6<br>50<br>32<br>67<br>74 | 0.1<br>25<br>76<br>90<br>51      | 0.9<br>75<br>67<br>17<br>57 | d_<br>_B<br>act<br>eri<br>a | p__F<br>usoba<br>cterio<br>ta | c__Fu<br>sobact<br>eria | o__Fus<br>obacte<br>riales          | f__Fuso<br>bacteria<br>ceae   | g__Fusoba<br>cterium_A           | s__Fusobacte<br>rium_A<br>unknown_2           |
| MGYG-HGUT-02575:s__Bacteroidaceae unknown unknown_3 | 0.1<br>92<br>49<br>89<br>75 | 0.3<br>46<br>31<br>15<br>13      | 0.8<br>91<br>82<br>55<br>59 | d_<br>_B<br>act<br>eri<br>a | p__B<br>acter<br>oidot<br>a   | c__Ba<br>cteroi<br>dia  | o__Bac<br>teroida<br>les            | f__Bact<br>eroidac<br>eae     | g__Bacter<br>oidaceae<br>unknown | s__Bacteroida<br>ceae<br>unknown<br>unknown_3 |
| MGYG-HGUT-02580:s__Lachnospira sp000436475          | 0.8<br>70<br>31<br>99<br>75 | -<br>0.0<br>45<br>47<br>46<br>61 | 0.9<br>94<br>47<br>94<br>74 | d_<br>_B<br>act<br>eri<br>a | p__Fi<br>rmicu<br>tes_A       | c__Clo<br>stridia       | o__Lac<br>hnospi<br>rales           | f__Lach<br>nospirac<br>eae    | g__Lachno<br>spira               | s__Lachnospira<br>sp000436475                 |
| MGYG-HGUT-02585:s__Bacteroides unknown_6            | 0.8<br>32<br>55<br>94<br>17 | 0.0<br>59<br>08<br>10<br>12      | 0.9<br>92<br>22<br>01<br>9  | d_<br>_B<br>act<br>eri<br>a | p__B<br>acter<br>oidot<br>a   | c__Ba<br>cteroi<br>dia  | o__Bac<br>teroida<br>les            | f__Bact<br>eroidac<br>eae     | g__Bacter<br>oides               | s__Bacteroides<br>unknown_6                   |
| MGYG-HGUT-02587:s__Parabacteroides unknown_11       | 0.1<br>55<br>98<br>75<br>91 | -<br>0.3<br>96<br>02<br>32<br>01 | 0.8<br>91<br>82<br>55<br>59 | d_<br>_B<br>act<br>eri<br>a | p__B<br>acter<br>oidot<br>a   | c__Ba<br>cteroi<br>dia  | o__Bac<br>teroida<br>les            | f__Tann<br>erellace<br>ae     | g__Paraba<br>cteroides           | s__Parabacteroides<br>unknown_11              |
| MGYG-HGUT-02588:s__Lawsonibacter unknown_7          | 0.8<br>05<br>89             | -<br>0.0<br>68<br>12             | 0.9<br>87<br>14             | d_<br>_B<br>act             | p__Fi<br>rmicu<br>tes_A       | c__Clo<br>stridia       | o__Os<br>cillospi<br>rales          | f__Oscil<br>lospirac<br>eae   | g__Lawson<br>ibacter             | s__Lawsonibacter<br>unknown_7                 |

|                                               |                             |                                                   |                             |                             |                             |                        |                            |                             |                      |                                    |
|-----------------------------------------------|-----------------------------|---------------------------------------------------|-----------------------------|-----------------------------|-----------------------------|------------------------|----------------------------|-----------------------------|----------------------|------------------------------------|
|                                               | 84<br>32                    | 14<br>5                                           | 23<br>02                    | eri<br>a                    |                             |                        |                            |                             |                      |                                    |
| MGYG-HGUT-02589:s__CAG-110 unknown_19         | 0.2<br>35<br>46<br>20<br>79 | 0.3<br>18<br>35<br>93<br>61                       | 0.9<br>02<br>18<br>13<br>67 | d_<br>_B<br>act<br>eri<br>a | p__Fi<br>rmicu<br>tes_A     | c__Clo<br>stridia      | o__Os<br>cillospi<br>rales | f__Oscil<br>lospirac<br>eae | g__CAG-<br>110       | s__CAG-110<br>unknown_19           |
| MGYG-HGUT-02592:s__Alistipes unknown_8        | 0.3<br>31<br>83<br>54<br>4  | -<br>0.2<br>30<br>57<br>62<br>57<br>46<br>12<br>5 | 0.9<br>30<br>62<br>46<br>92 | d_<br>_B<br>act<br>eri<br>a | p__B<br>acter<br>oidot<br>a | c__Ba<br>cteroi<br>dia | o__Bac<br>teroida<br>les   | f__Rike<br>nellacea<br>e    | g__Alistipe<br>s     | s__Alistipes<br>unknown_8          |
| MGYG-HGUT-02594:s__Streptococcus unknown_10   | 0.9<br>32<br>57<br>18<br>01 | 0.0<br>23<br>27<br>85<br>05                       | 0.9<br>94<br>47<br>94<br>74 | d_<br>_B<br>act<br>eri<br>a | p__Fi<br>rmicu<br>tes       | c__Ba<br>cilli         | o__Lac<br>tobacill<br>ales | f__Stre<br>ptococc<br>aceae | g__Strepto<br>coccus | s__Streptococ<br>cus<br>unknown_10 |
| MGYG-HGUT-02595:s__CAG-83 unknown_11          | 0.9<br>88<br>82<br>62<br>81 | 0.0<br>03<br>81<br>49<br>06                       | 0.9<br>98<br>80<br>33<br>46 | d_<br>_B<br>act<br>eri<br>a | p__Fi<br>rmicu<br>tes_A     | c__Clo<br>stridia      | o__Os<br>cillospi<br>rales | f__Oscil<br>lospirac<br>eae | g__CAG-<br>83        | s__CAG-83<br>unknown_11            |
| MGYG-HGUT-02596:s__Faecalibacterium unknown_6 | 0.1<br>90<br>75<br>94<br>39 | -<br>0.3<br>57<br>72<br>23<br>97                  | 0.8<br>91<br>82<br>55<br>59 | d_<br>_B<br>act<br>eri<br>a | p__Fi<br>rmicu<br>tes_A     | c__Clo<br>stridia      | o__Lac<br>hnospi<br>rales  | f__Lach<br>nospirac<br>eae  | g__Faecali<br>catena | s__Faecalicat<br>ena<br>unknown_6  |
| MGYG-HGUT-02598:s__Blautia unknown_8          | 0.4<br>42<br>48<br>60<br>41 | 0.2<br>09<br>48<br>93<br>17                       | 0.9<br>60<br>27<br>33<br>89 | d_<br>_B<br>act<br>eri<br>a | p__Fi<br>rmicu<br>tes_A     | c__Clo<br>stridia      | o__Lac<br>hnospi<br>rales  | f__Lach<br>nospirac<br>eae  | g__Blautia           | s__Blautia<br>unknown_8            |
| MGYG-HGUT-02601:s__CAG-110 unknown_20         | 0.7<br>23<br>25<br>22<br>92 | 0.0<br>98<br>50<br>80<br>19                       | 0.9<br>79<br>45<br>84<br>75 | d_<br>_B<br>act<br>eri<br>a | p__Fi<br>rmicu<br>tes_A     | c__Clo<br>stridia      | o__Os<br>cillospi<br>rales | f__Oscil<br>lospirac<br>eae | g__CAG-<br>110       | s__CAG-110<br>unknown_20           |
| MGYG-HGUT-02602:s__CAG-274 unknown            | 0.1<br>32<br>48<br>41<br>02 | -<br>0.4<br>18<br>05<br>83<br>46                  | 0.8<br>91<br>82<br>55<br>59 | d_<br>_B<br>act<br>eri<br>a | p__Fi<br>rmicu<br>tes_A     | c__Clo<br>stridia      | o__Lac<br>hnospi<br>rales  | f__CAG-<br>274              | g__CAG-<br>274       | s__CAG-274<br>unknown              |
| MGYG-HGUT-02603:s__Prevotella unknown_30      | 0.7<br>25<br>22             | 0.0<br>94<br>87                                   | 0.9<br>79<br>45             | d_<br>_B<br>act             | p__B<br>acter               | c__Ba<br>cteroi<br>dia | o__Bac<br>teroida<br>les   | f__Bact<br>eroidac<br>eae   | g__Prevot<br>ella    | s__Prevotella<br>unknown_30        |

|                                                   |                             |                                  |                             |                             |                             |                          |                            |                            |                         |                                          |
|---------------------------------------------------|-----------------------------|----------------------------------|-----------------------------|-----------------------------|-----------------------------|--------------------------|----------------------------|----------------------------|-------------------------|------------------------------------------|
|                                                   | 64<br>8                     | 11<br>83                         | 84<br>75                    | eri<br>a                    | oidot<br>a                  |                          |                            |                            |                         |                                          |
| MGYG-HGUT-02609:s__CAG-882 sp003486385            | 0.8<br>39<br>22<br>06<br>72 | -<br>0.0<br>57<br>01<br>99<br>07 | 0.9<br>92<br>87<br>80<br>88 | d_<br>_B<br>act<br>eri<br>a | p__Fi<br>rmicu<br>tes_A     | c__Clo<br>stridia        | o__Lac<br>hnoSPI<br>rales  | f__Lach<br>nospira<br>cae  | g__CAG-<br>882          | s__CAG-882<br>sp003486385                |
| MGYG-HGUT-02610:s__Faecalibacterium unknown_8     | 0.0<br>60<br>47<br>03<br>14 | 0.5<br>16<br>32<br>85<br>62      | 0.8<br>57<br>21<br>13<br>2  | d_<br>_B<br>act<br>eri<br>a | p__Fi<br>rmicu<br>tes_A     | c__Clo<br>stridia        | o__Os<br>cilloSPI<br>rales | f__Rumi<br>nococca<br>cae  | g__Faecali<br>bacterium | s__Faecaliba<br>cterium<br>unknown_8     |
| MGYG-HGUT-02612:s__CAG-83 sp003539495             | 0.2<br>44<br>65<br>15<br>37 | 0.3<br>20<br>27<br>60<br>74      | 0.9<br>02<br>18<br>13<br>67 | d_<br>_B<br>act<br>eri<br>a | p__Fi<br>rmicu<br>tes_A     | c__Clo<br>stridia        | o__Os<br>cilloSPI<br>rales | f__Oscil<br>loSPIra<br>cae | g__CAG-<br>83           | s__CAG-83<br>sp003539495                 |
| MGYG-HGUT-02614:s__Bacteroides_A unknown_10       | 0.9<br>04<br>70<br>62<br>81 | 0.0<br>33<br>50<br>45<br>05      | 0.9<br>94<br>47<br>94<br>74 | d_<br>_B<br>act<br>eri<br>a | p__B<br>acter<br>oidot<br>a | c__Ba<br>cteroi<br>dia   | o__Bac<br>teroida<br>les   | f__Bact<br>eroidac<br>cae  | g__Bacter<br>oides_A    | s__Bacteroid<br>es_A<br>unknown_10       |
| MGYG-HGUT-02617:s__Oscillibacter unknown_14       | 0.0<br>64<br>93<br>18<br>28 | 0.5<br>06<br>72<br>34<br>37      | 0.8<br>57<br>21<br>13<br>2  | d_<br>_B<br>act<br>eri<br>a | p__Fi<br>rmicu<br>tes_A     | c__Clo<br>stridia        | o__Os<br>cilloSPI<br>rales | f__Oscil<br>loSPIra<br>cae | g__Oscilib<br>acter     | s__Oscilliba<br>cter<br>unknown_14       |
| MGYG-HGUT-02619:s__Faecalibacterium prausnitzii_J | 0.0<br>19<br>98<br>08<br>87 | 0.6<br>23<br>49<br>61<br>61      | 0.7<br>68<br>22<br>58<br>34 | d_<br>_B<br>act<br>eri<br>a | p__Fi<br>rmicu<br>tes_A     | c__Clo<br>stridia        | o__Os<br>cilloSPI<br>rales | f__Rumi<br>nococca<br>cae  | g__Faecali<br>bacterium | s__Faecaliba<br>cterium<br>prausnitzii_J |
| MGYG-HGUT-02625:s__Negativibacillus massiliensis  | 0.0<br>83<br>33<br>13<br>6  | -<br>0.4<br>80<br>27<br>91<br>65 | 0.8<br>81<br>14<br>28<br>43 | d_<br>_B<br>act<br>eri<br>a | p__Fi<br>rmicu<br>tes_A     | c__Clo<br>stridia        | o__Os<br>cilloSPI<br>rales | f__Rumi<br>nococca<br>cae  | g__Negati<br>vibacillus | s__Negativiba<br>cillus<br>massiliensis  |
| MGYG-HGUT-02633:s__TF01-11 sp003149875            | 0.9<br>76<br>83<br>65<br>97 | 0.0<br>07<br>86<br>18<br>63      | 0.9<br>96<br>58<br>78<br>01 | d_<br>_B<br>act<br>eri<br>a | p__Fi<br>rmicu<br>tes_A     | c__Clo<br>stridia        | o__Lac<br>hnoSPI<br>rales  | f__Lach<br>nospira<br>cae  | g__TF01-<br>11          | s__TF01-11<br>sp003149875                |
| MGYG-HGUT-02640:s__Veillonella parvula            | 0.3<br>15<br>01             | 0.2<br>74<br>31<br>75            | 0.9<br>29<br>02             | d_<br>_B<br>act             | p__Fi<br>rmicu<br>tes_C     | c__Ne<br>gativic<br>utes | o__Vei<br>llonella<br>les  | f__Veill<br>onellace<br>ae | g__Veillon<br>ella      | s__Veillonella<br>parvula                |

|                                                       |                             |                                  |                             |                             |                             |                          |                                  |                             |                                    |                                                  |
|-------------------------------------------------------|-----------------------------|----------------------------------|-----------------------------|-----------------------------|-----------------------------|--------------------------|----------------------------------|-----------------------------|------------------------------------|--------------------------------------------------|
|                                                       | 42<br>22                    |                                  | 59<br>13                    | eri<br>a                    |                             |                          |                                  |                             |                                    |                                                  |
| MGYG-HGUT-02641:s__Faecalibacterium sp003449675       | 0.1<br>33<br>10<br>80<br>95 | 0.4<br>12<br>36<br>49<br>67      | 0.8<br>91<br>82<br>55<br>59 | d_<br>_B<br>act<br>eri<br>a | p__Fi<br>rmicu<br>tes_A     | c__Clo<br>stridia        | o__Os<br>cillospi<br>rales       | f__Rumi<br>nococca<br>ceae  | g__Faecali<br>bacterium            | s__Faecalibac<br>terium<br>sp003449675           |
| MGYG-HGUT-02642:s__Veillonella unknown_9              | 0.5<br>19<br>91<br>95<br>43 | 0.1<br>80<br>18<br>42<br>63      | 0.9<br>68<br>53<br>20<br>73 | d_<br>_B<br>act<br>eri<br>a | p__Fi<br>rmicu<br>tes_C     | c__Ne<br>gativic<br>utes | o__Vei<br>llonella<br>les        | f__Veill<br>onellace<br>ae  | g__Veillon<br>ella                 | s__Veillonella<br>unknown_9                      |
| MGYG-HGUT-02651:s__Faecalibacterium unknown_9         | 0.0<br>86<br>32<br>60<br>62 | 0.4<br>62<br>79<br>94<br>79      | 0.8<br>82<br>71<br>60<br>64 | d_<br>_B<br>act<br>eri<br>a | p__Fi<br>rmicu<br>tes_A     | c__Clo<br>stridia        | o__Os<br>cillospi<br>rales       | f__Rumi<br>nococca<br>ceae  | g__Faecali<br>bacterium            | s__Faecalibac<br>terium<br>unknown_9             |
| MGYG-HGUT-02653:s__Prevotella sp002251295             | 0.7<br>95<br>39<br>41<br>07 | -<br>0.0<br>72<br>84<br>66<br>07 | 0.9<br>82<br>96<br>63       | d_<br>_B<br>act<br>eri<br>a | p__B<br>acter<br>oidot<br>a | c__Ba<br>cteroi<br>dia   | o__Bac<br>teroida<br>les         | f__Bact<br>eroidac<br>eae   | g__Prevot<br>ella                  | s__Prevotella<br>sp002251295                     |
| MGYG-HGUT-02657:s__CAG-95 unknown_3                   | 0.1<br>89<br>55<br>11<br>02 | 0.3<br>62<br>41<br>96<br>22      | 0.8<br>91<br>82<br>55<br>59 | d_<br>_B<br>act<br>eri<br>a | p__Fi<br>rmicu<br>tes_A     | c__Clo<br>stridia        | o__Lac<br>hnospi<br>rales        | f__Lach<br>nospirac<br>eae  | g__CAG-<br>95                      | s__CAG-95<br>unknown_3                           |
| MGYG-HGUT-02659:s__Phascolarctobacterium_A unknown_10 | 0.7<br>47<br>33<br>50<br>22 | 0.0<br>90<br>04<br>16<br>02      | 0.9<br>79<br>45<br>84<br>75 | d_<br>_B<br>act<br>eri<br>a | p__Fi<br>rmicu<br>tes_C     | c__Ne<br>gativic<br>utes | o__Aci<br>damin<br>ococca<br>les | f__Acid<br>aminoc<br>caceae | g__Phasco<br>larctobact<br>erium_A | s__Phascolar<br>ctobacterium_<br>A<br>unknown_10 |
| MGYG-HGUT-02667:s__F23-B02 unknown_6                  | 0.6<br>48<br>36<br>30<br>11 | -<br>0.1<br>25<br>44<br>31<br>22 | 0.9<br>75<br>67<br>17<br>57 | d_<br>_B<br>act<br>eri<br>a | p__Fi<br>rmicu<br>tes_A     | c__Clo<br>stridia        | o__Os<br>cillospi<br>rales       | f__Oscil<br>lospirac<br>eae | g__F23-<br>B02                     | s__F23-B02<br>unknown_6                          |
| MGYG-HGUT-02668:s__Prevotella unknown_33              | 0.6<br>50<br>51<br>82<br>63 | 0.1<br>25<br>58<br>57<br>91      | 0.9<br>75<br>67<br>17<br>57 | d_<br>_B<br>act<br>eri<br>a | p__B<br>acter<br>oidot<br>a | c__Ba<br>cteroi<br>dia   | o__Bac<br>teroida<br>les         | f__Bact<br>eroidac<br>eae   | g__Prevot<br>ella                  | s__Prevotella<br>unknown_33                      |
| MGYG-HGUT-02670:s__Agathobacter unknown_5             | 0.8<br>53<br>08             | -<br>0.0<br>48<br>91             | 0.9<br>92<br>87             | d_<br>_B<br>act             | p__Fi<br>rmicu<br>tes_A     | c__Clo<br>stridia        | o__Lac<br>hnospi<br>rales        | f__Lach<br>nospirac<br>eae  | g__Agathob<br>acter                | s__Agathobac<br>ter<br>unknown_5                 |

|                                                       |                             |                                  |                             |                             |                         |                   |                                   |                             |                                    |                                                 |
|-------------------------------------------------------|-----------------------------|----------------------------------|-----------------------------|-----------------------------|-------------------------|-------------------|-----------------------------------|-----------------------------|------------------------------------|-------------------------------------------------|
|                                                       | 00<br>48                    | 19<br>58                         | 80<br>88                    | eri<br>a                    |                         |                   |                                   |                             |                                    |                                                 |
| MGYG-HGUT-02673:s__UBA9475 unknown_2                  | 0.5<br>86<br>16<br>61<br>37 | 0.1<br>47<br>67<br>71<br>09      | 0.9<br>75<br>67<br>17<br>57 | d_<br>_B<br>act<br>eri<br>a | p__Fi<br>rmicu<br>tes_A | c__Clo<br>stridia | o__Os<br>cillospi<br>rales        | f__Oscil<br>lospirac<br>eae | g__UBA94<br>75                     | s__UBA9475<br>unknown_2                         |
| MGYG-HGUT-02680:s__Oscillibacter unknown_15           | 0.0<br>38<br>27<br>51<br>79 | -<br>0.5<br>52<br>60<br>64<br>99 | 0.7<br>68<br>22<br>58<br>34 | d_<br>_B<br>act<br>eri<br>a | p__Fi<br>rmicu<br>tes_A | c__Clo<br>stridia | o__Os<br>cillospi<br>rales        | f__Oscil<br>lospirac<br>eae | g__Oscilib<br>acter                | s__Oscilibact<br>er<br>unknown_15               |
| MGYG-HGUT-02681:s__QAND01 unknown unknown_4           | 0.2<br>55<br>07<br>02<br>6  | -<br>0.3<br>17<br>60<br>44<br>92 | 0.9<br>05<br>01<br>56<br>96 | d_<br>_B<br>act<br>eri<br>a | p__Fi<br>rmicu<br>tes_A | c__Clo<br>stridia | o__Chr<br>istense<br>nellale<br>s | f__QAN<br>D01               | g__QAND0<br>1<br>unknown           | s__QAND01<br>unknown<br>unknown_4               |
| MGYG-HGUT-02682:s__Oscillibacter unknown_16           | 0.6<br>04<br>03<br>41<br>61 | 0.1<br>31<br>50<br>72<br>76      | 0.9<br>75<br>67<br>17<br>57 | d_<br>_B<br>act<br>eri<br>a | p__Fi<br>rmicu<br>tes_A | c__Clo<br>stridia | o__Os<br>cillospi<br>rales        | f__Oscil<br>lospirac<br>eae | g__Oscilib<br>acter                | s__Oscilibact<br>er<br>unknown_16               |
| MGYG-HGUT-02684:s__UBA3818 unknown_2                  | 0.8<br>33<br>38<br>59<br>35 | -<br>0.0<br>58<br>42<br>56<br>03 | 0.9<br>92<br>22<br>01<br>9  | d_<br>_B<br>act<br>eri<br>a | p__Fi<br>rmicu<br>tes_A | c__Clo<br>stridia | o__Os<br>cillospi<br>rales        | f__Rumi<br>nococca<br>ceae  | g__UBA38<br>18                     | s__UBA3818<br>unknown_2                         |
| MGYG-HGUT-02685:s__UBA9506 unknown unknown_1          | 0.8<br>81<br>62<br>35<br>26 | -<br>0.0<br>41<br>62<br>12<br>47 | 0.9<br>94<br>47<br>94<br>74 | d_<br>_B<br>act<br>eri<br>a | p__Fi<br>rmicu<br>tes_A | c__Clo<br>stridia | o__Mo<br>noglob<br>ales           | f__UBA<br>9506              | g__UBA95<br>06<br>unknown          | s__UBA9506<br>unknown<br>unknown_1              |
| MGYG-HGUT-02689:s__Ruminococcaceae unknown unknown_16 | 0.9<br>34<br>46<br>02<br>72 | -<br>0.0<br>23<br>02<br>17<br>04 | 0.9<br>94<br>47<br>94<br>74 | d_<br>_B<br>act<br>eri<br>a | p__Fi<br>rmicu<br>tes_A | c__Clo<br>stridia | o__Os<br>cillospi<br>rales        | f__Rumi<br>nococca<br>ceae  | g__Rumin<br>ococcacea<br>e unknown | s__Ruminoco<br>ccaceae<br>unknown<br>unknown_16 |
| MGYG-HGUT-02691:s__Oscillibacter unknown_17           | 0.5<br>65<br>51<br>12<br>58 | 0.1<br>56<br>62<br>15<br>89      | 0.9<br>71<br>33<br>90<br>3  | d_<br>_B<br>act<br>eri<br>a | p__Fi<br>rmicu<br>tes_A | c__Clo<br>stridia | o__Os<br>cillospi<br>rales        | f__Oscil<br>lospirac<br>eae | g__Oscilib<br>acter                | s__Oscilibact<br>er<br>unknown_17               |

|                                                          |             |              |             |             |                 |               |                    |                       |                               |                                          |
|----------------------------------------------------------|-------------|--------------|-------------|-------------|-----------------|---------------|--------------------|-----------------------|-------------------------------|------------------------------------------|
| MGYG-HGUT-02693:s__Eubacterium_E sp002161065             | 0.675430197 | 0.114898949  | 0.975671757 | d__Bacteria | p__Firmicutes_A | c__Clostridia | o__Lachnospirales  | f__Lachnospiraceae    | g__Eubacterium_E              | s__Eubacterium_E sp002161065             |
| MGYG-HGUT-02694:s__Acutalibacteraceae unknown unknown_27 | 0.946819905 | -0.018713265 | 0.994479474 | d__Bacteria | p__Firmicutes_A | c__Clostridia | o__Oscillospirales | f__Acutalibacteraceae | g__Acutalibacteraceae unknown | s__Acutalibacteraceae unknown unknown_27 |
| MGYG-HGUT-02696:s__Oscillospiraceae unknown unknown_11   | 0.188058549 | -0.347797061 | 0.891825559 | d__Bacteria | p__Firmicutes_A | c__Clostridia | o__Oscillospirales | f__Oscillospiraceae   | g__Oscillospiraceae unknown   | s__Oscillospiraceae unknown unknown_11   |
| MGYG-HGUT-02697:s__Acutalibacteraceae unknown unknown_28 | 0.726902474 | 0.095040181  | 0.979458475 | d__Bacteria | p__Firmicutes_A | c__Clostridia | o__Oscillospirales | f__Acutalibacteraceae | g__Acutalibacteraceae unknown | s__Acutalibacteraceae unknown unknown_28 |
| MGYG-HGUT-02704:s__Oscillibacter unknown_18              | 0.964386739 | 0.011841025  | 0.994479474 | d__Bacteria | p__Firmicutes_A | c__Clostridia | o__Oscillospirales | f__Oscillospiraceae   | g__Oscillibacter              | s__Oscillibacter unknown_18              |
| MGYG-HGUT-02707:s__Flavonifractor unknown_2              | 0.252429034 | 0.298660732  | 0.902181367 | d__Bacteria | p__Firmicutes_A | c__Clostridia | o__Oscillospirales | f__Oscillospiraceae   | g__Flavonifractor             | s__Flavonifractor unknown_2              |
| MGYG-HGUT-02708:s__UBA3818 unknown_3                     | 0.624028099 | 0.136915697  | 0.975671757 | d__Bacteria | p__Firmicutes_A | c__Clostridia | o__Oscillospirales | f__Ruminococcaceae    | g__UBA3818                    | s__UBA3818 unknown_3                     |
| MGYG-HGUT-02710:s__CAG-170 unknown_8                     | 0.298122506 | 0.267372899  | 0.929025913 | d__Bacteria | p__Firmicutes_A | c__Clostridia | o__Oscillospirales | f__Oscillospiraceae   | g__CAG-170                    | s__CAG-170 unknown_8                     |
| MGYG-HGUT-02711:s__Acutalibacteraceae unknown unknown_33 | 0.640550572 | -0.1164952   | 0.975671757 | d__Bacteria | p__Firmicutes_A | c__Clostridia | o__Oscillospirales | f__Acutalibacteraceae | g__Acutalibacteraceae unknown | s__Acutalibacteraceae unknown unknown_33 |

|                                                         |                             |                                  |                             |                             |                                 |                           |                                  |                                                 |                                                 |                                                             |
|---------------------------------------------------------|-----------------------------|----------------------------------|-----------------------------|-----------------------------|---------------------------------|---------------------------|----------------------------------|-------------------------------------------------|-------------------------------------------------|-------------------------------------------------------------|
| MGYG-HGUT-02712:s__Adlercreutzia unknown                | 0.7<br>13<br>41<br>68<br>78 | -<br>0.1<br>02<br>37<br>27<br>77 | 0.9<br>79<br>45<br>84<br>75 | d_<br>_B<br>act<br>eri<br>a | p__A<br>ctino<br>bacte<br>riota | c__Co<br>riobac<br>teriia | o__Cor<br>iobact<br>eriales      | f__Egge<br>rthellac<br>eae                      | g__Adlercr<br>eutzia                            | s__Adlercreut<br>zia unknown                                |
| MGYG-HGUT-02713:s__UBA4716 unknown_3                    | 0.3<br>68<br>23<br>62<br>92 | -<br>0.2<br>48<br>49<br>46<br>19 | 0.9<br>39<br>70<br>92<br>5  | d_<br>_B<br>act<br>eri<br>a | p__Fi<br>rmicu<br>tes_A         | c__Clo<br>stridia         | o__Mo<br>noglob<br>ales          | f__UBA<br>1381                                  | g__UBA47<br>16                                  | s__UBA4716<br>unknown_3                                     |
| MGYG-HGUT-02715:s__ER4 sp900317525                      | 0.0<br>77<br>07<br>71<br>14 | 0.4<br>39<br>90<br>36<br>52      | 0.8<br>77<br>82<br>62<br>47 | d_<br>_B<br>act<br>eri<br>a | p__Fi<br>rmicu<br>tes_A         | c__Clo<br>stridia         | o__Os<br>cillospi<br>rales       | f__Oscil<br>lospirac<br>eae                     | g__ER4                                          | s__ER4<br>sp900317525                                       |
| MGYG-HGUT-02716:s__F23-B02 unknown_7                    | 0.1<br>10<br>27<br>24<br>84 | 0.4<br>42<br>30<br>24<br>27      | 0.8<br>83<br>30<br>72<br>56 | d_<br>_B<br>act<br>eri<br>a | p__Fi<br>rmicu<br>tes_A         | c__Clo<br>stridia         | o__Os<br>cillospi<br>rales       | f__Oscil<br>lospirac<br>eae                     | g__F23-<br>B02                                  | s__F23-B02<br>unknown_7                                     |
| MGYG-HGUT-02717:s__Bacteroides unknown_7                | 0.2<br>15<br>95<br>29<br>5  | 0.3<br>45<br>63<br>76<br>15      | 0.8<br>91<br>82<br>55<br>59 | d_<br>_B<br>act<br>eri<br>a | p__B<br>acter<br>oidot<br>a     | c__Ba<br>cteroi<br>dia    | o__Bac<br>teroida<br>les         | f__Bact<br>eroidac<br>eae                       | g__Bacter<br>oides                              | s__Bacteroides<br>unknown_7                                 |
| MGYG-HGUT-02718:s__Butyricoccus unknown_2               | 0.6<br>75<br>25<br>44<br>56 | 0.1<br>17<br>68<br>02<br>21      | 0.9<br>75<br>67<br>17<br>57 | d_<br>_B<br>act<br>eri<br>a | p__Fi<br>rmicu<br>tes_A         | c__Clo<br>stridia         | o__Os<br>cillospi<br>rales       | f__Buty<br>ricoccc<br>aceae                     | g__Butyric<br>ococcus                           | s__Butyricoco<br>ccus<br>unknown_2                          |
| MGYG-HGUT-02719:s__Clostridia unknown unknown unknown_4 | 0.1<br>79<br>44<br>44<br>53 | 0.3<br>73<br>53<br>68<br>58      | 0.8<br>91<br>82<br>55<br>59 | d_<br>_B<br>act<br>eri<br>a | p__Fi<br>rmicu<br>tes_A         | c__Clo<br>stridia         | o__Clo<br>stridia<br>unkno<br>wn | f__Clost<br>ridia<br>unknow<br>n<br>unknow<br>n | g__Clostri<br>dia<br>unknow<br>n<br>unknow<br>n | s__Clostridia<br>unknown<br>unknown<br>unknown<br>unknown_4 |
| MGYG-HGUT-02720:s__CAG-83 sp000435555                   | 0.4<br>13<br>15<br>38<br>8  | 0.2<br>16<br>45<br>86<br>05      | 0.9<br>39<br>70<br>92<br>5  | d_<br>_B<br>act<br>eri<br>a | p__Fi<br>rmicu<br>tes_A         | c__Clo<br>stridia         | o__Os<br>cillospi<br>rales       | f__Oscil<br>lospirac<br>eae                     | g__CAG-<br>83                                   | s__CAG-83<br>sp000435555                                    |
| MGYG-HGUT-02724:s__CAG-83 unknown_12                    | 0.5<br>19<br>30<br>73<br>66 | 0.1<br>70<br>46<br>54<br>38      | 0.9<br>68<br>53<br>20<br>73 | d_<br>_B<br>act<br>eri<br>a | p__Fi<br>rmicu<br>tes_A         | c__Clo<br>stridia         | o__Os<br>cillospi<br>rales       | f__Oscil<br>lospirac<br>eae                     | g__CAG-<br>83                                   | s__CAG-83<br>unknown_12                                     |

|                                                          |             |             |             |             |                     |                   |                     |                       |                               |                                          |
|----------------------------------------------------------|-------------|-------------|-------------|-------------|---------------------|-------------------|---------------------|-----------------------|-------------------------------|------------------------------------------|
| MGYG-HGUT-02726:s__Oscillospiraceae unknown unknown_12   | 0.507253926 | -0.1842825  | 0.968532073 | d__Bacteria | p__Firmicutes_A     | c__Clostridia     | o__Oscillospirales  | f__Oscillospiraceae   | g__Oscillospiraceae unknown   | s__Oscillospiraceae unknown unknown_12   |
| MGYG-HGUT-02727:s__Oscillospiraceae unknown unknown_13   | 0.305289263 | 0.282286619 | 0.929025913 | d__Bacteria | p__Firmicutes_A     | c__Clostridia     | o__Oscillospirales  | f__Oscillospiraceae   | g__Oscillospiraceae unknown   | s__Oscillospiraceae unknown unknown_13   |
| MGYG-HGUT-02733:s__Collinsella unknown_226               | 0.75400215  | 0.085529798 | 0.979458475 | d__Bacteria | p__Actinobacteriota | c__Coriobacteriia | o__Coriobacteriales | f__Coriobacteriaceae  | g__Collinsella                | s__Collinsella unknown_226               |
| MGYG-HGUT-02735:s__Collinsella unknown_228               | 0.954443197 | 0.015973709 | 0.994479474 | d__Bacteria | p__Actinobacteriota | c__Coriobacteriia | o__Coriobacteriales | f__Coriobacteriaceae  | g__Collinsella                | s__Collinsella unknown_228               |
| MGYG-HGUT-02736:s__Acutalibacteraceae unknown unknown_34 | 0.295140892 | 0.291549091 | 0.929025913 | d__Bacteria | p__Firmicutes_A     | c__Clostridia     | o__Oscillospirales  | f__Acutalibacteraceae | g__Acutalibacteraceae unknown | s__Acutalibacteraceae unknown unknown_34 |
| MGYG-HGUT-02737:s__Prevotella unknown_34                 | 0.222165567 | 0.310813374 | 0.891825559 | d__Bacteria | p__Bacteroidota     | c__Bacteroidia    | o__Bacteroidales    | f__Bacteroidaceae     | g__Prevotella                 | s__Prevotella unknown_34                 |
| MGYG-HGUT-02738:s__Blautia unknown_9                     | 0.716920386 | 0.101163384 | 0.979458475 | d__Bacteria | p__Firmicutes_A     | c__Clostridia     | o__Lachnospirales   | f__Lachnospiraceae    | g__Blautia                    | s__Blautia unknown_9                     |
| MGYG-HGUT-02743:s__Collinsella unknown_233               | 0.735486215 | 0.092086192 | 0.979458475 | d__Bacteria | p__Actinobacteriota | c__Coriobacteriia | o__Coriobacteriales | f__Coriobacteriaceae  | g__Collinsella                | s__Collinsella unknown_233               |
| MGYG-HGUT-02744:s__Collinsella unknown_234               | 0.530685049 | 0.169679957 | 0.968532073 | d__Bacteria | p__Actinobacteriota | c__Coriobacteriia | o__Coriobacteriales | f__Coriobacteriaceae  | g__Collinsella                | s__Collinsella unknown_234               |



|                                                |                             |                                  |                             |                             |                                 |                           |                             |                              |                           |                                       |
|------------------------------------------------|-----------------------------|----------------------------------|-----------------------------|-----------------------------|---------------------------------|---------------------------|-----------------------------|------------------------------|---------------------------|---------------------------------------|
| MGYG-HGUT-02745:s__Collinsella unknown_235     | 0.6<br>27<br>87<br>15<br>74 | 0.1<br>33<br>34<br>55<br>21      | 0.9<br>75<br>67<br>17<br>57 | d_<br>_B<br>act<br>eri<br>a | p__A<br>ctino<br>bacte<br>riota | c__Co<br>riobac<br>teriia | o__Cor<br>iobact<br>eriales | f__Cori<br>obacteri<br>aceae | g__Collins<br>ella        | s__Collinsella<br>unknown_23<br>5     |
| MGYG-HGUT-02746:s__Collinsella unknown_236     | 0.0<br>37<br>74<br>33<br>65 | 0.5<br>67<br>43<br>87<br>92      | 0.7<br>68<br>22<br>58<br>34 | d_<br>_B<br>act<br>eri<br>a | p__A<br>ctino<br>bacte<br>riota | c__Co<br>riobac<br>teriia | o__Cor<br>iobact<br>eriales | f__Cori<br>obacteri<br>aceae | g__Collins<br>ella        | s__Collinsella<br>unknown_23<br>6     |
| MGYG-HGUT-02748:s__Collinsella unknown_238     | 0.1<br>56<br>06<br>35<br>75 | 0.3<br>87<br>92<br>99<br>53      | 0.8<br>91<br>82<br>55<br>59 | d_<br>_B<br>act<br>eri<br>a | p__A<br>ctino<br>bacte<br>riota | c__Co<br>riobac<br>teriia | o__Cor<br>iobact<br>eriales | f__Cori<br>obacteri<br>aceae | g__Collins<br>ella        | s__Collinsella<br>unknown_23<br>8     |
| MGYG-HGUT-02750:s__Collinsella unknown_240     | 0.0<br>33<br>75<br>14<br>82 | 0.5<br>79<br>55<br>16<br>14      | 0.7<br>68<br>22<br>58<br>34 | d_<br>_B<br>act<br>eri<br>a | p__A<br>ctino<br>bacte<br>riota | c__Co<br>riobac<br>teriia | o__Cor<br>iobact<br>eriales | f__Cori<br>obacteri<br>aceae | g__Collins<br>ella        | s__Collinsella<br>unknown_24<br>0     |
| MGYG-HGUT-02753:s__CAG-103 unknown_3           | 0.4<br>48<br>77<br>28<br>71 | 0.2<br>12<br>03<br>51<br>49      | 0.9<br>61<br>29<br>22<br>08 | d_<br>_B<br>act<br>eri<br>a | p__Fi<br>rmicu<br>tes_A         | c__Clo<br>stridia         | o__Os<br>cillospi<br>rales  | f__Oscil<br>lospirac<br>eae  | g__CAG-<br>103            | s__CAG-103<br>unknown_3               |
| MGYG-HGUT-02754:s__Collinsella aerofaciens_F_9 | 0.8<br>09<br>76<br>55<br>67 | 0.0<br>66<br>63<br>09<br>59      | 0.9<br>87<br>14<br>23<br>02 | d_<br>_B<br>act<br>eri<br>a | p__A<br>ctino<br>bacte<br>riota | c__Co<br>riobac<br>teriia | o__Cor<br>iobact<br>eriales | f__Cori<br>obacteri<br>aceae | g__Collins<br>ella        | s__Collinsella<br>aerofaciens_F<br>_9 |
| MGYG-HGUT-02758:s__UBA1381 unknown_4           | 0.7<br>13<br>92<br>48<br>93 | 0.0<br>95<br>44<br>37<br>35      | 0.9<br>79<br>45<br>84<br>75 | d_<br>_B<br>act<br>eri<br>a | p__Fi<br>rmicu<br>tes_A         | c__Clo<br>stridia         | o__Mo<br>noglob<br>ales     | f__UBA<br>1381               | g__UBA13<br>81<br>unknown | s__UBA1381<br>unknown<br>unknown_4    |
| MGYG-HGUT-02759:s__Collinsella unknown_245     | 0.6<br>37<br>66<br>92<br>4  | 0.1<br>30<br>88<br>16<br>78      | 0.9<br>75<br>67<br>17<br>57 | d_<br>_B<br>act<br>eri<br>a | p__A<br>ctino<br>bacte<br>riota | c__Co<br>riobac<br>teriia | o__Cor<br>iobact<br>eriales | f__Cori<br>obacteri<br>aceae | g__Collins<br>ella        | s__Collinsella<br>unknown_24<br>5     |
| MGYG-HGUT-02762:s__CAG-485 unknown_11          | 0.3<br>12<br>42<br>47<br>96 | -<br>0.2<br>82<br>87<br>30<br>59 | 0.9<br>29<br>02<br>59<br>13 | d_<br>_B<br>act<br>eri<br>a | p__B<br>acter<br>oidot<br>a     | c__Ba<br>cteroi<br>dia    | o__Bac<br>teroida<br>les    | f__Muri<br>baculac<br>eae    | g__CAG-<br>485            | s__CAG-485<br>unknown_11              |

|                                                        |                             |                                  |                             |                             |                                 |                           |                                   |                                          |                                    |                                                  |
|--------------------------------------------------------|-----------------------------|----------------------------------|-----------------------------|-----------------------------|---------------------------------|---------------------------|-----------------------------------|------------------------------------------|------------------------------------|--------------------------------------------------|
| MGYG-HGUT-02763:s__Collinsella aerofaciens_F_11        | 0.3<br>33<br>68<br>85<br>39 | 0.2<br>68<br>82<br>06<br>74      | 0.9<br>30<br>62<br>46<br>92 | d_<br>_B<br>act<br>eri<br>a | p__A<br>ctino<br>bacte<br>riota | c__Co<br>riobac<br>teriia | o__Cor<br>iobact<br>eriales       | f__Cori<br>obacteri<br>aceae             | g__Collins<br>ella                 | s__Collinsella<br>aerofaciens_F<br>_11           |
| MGYG-HGUT-02764:s__Collinsella sp000763055_3           | 0.3<br>62<br>54<br>57<br>73 | 0.2<br>44<br>48<br>75<br>85      | 0.9<br>39<br>70<br>92<br>5  | d_<br>_B<br>act<br>eri<br>a | p__A<br>ctino<br>bacte<br>riota | c__Co<br>riobac<br>teriia | o__Cor<br>iobact<br>eriales       | f__Cori<br>obacteri<br>aceae             | g__Collins<br>ella                 | s__Collinsella<br>sp000763055<br>_3              |
| MGYG-HGUT-02765:s__Collinsella unknown_246             | 0.4<br>83<br>40<br>52<br>62 | 0.1<br>95<br>91<br>30<br>63      | 0.9<br>68<br>53<br>20<br>73 | d_<br>_B<br>act<br>eri<br>a | p__A<br>ctino<br>bacte<br>riota | c__Co<br>riobac<br>teriia | o__Cor<br>iobact<br>eriales       | f__Cori<br>obacteri<br>aceae             | g__Collins<br>ella                 | s__Collinsella<br>unknown_24<br>6                |
| MGYG-HGUT-02766:s__Collinsella unknown_247             | 0.6<br>78<br>20<br>29<br>34 | 0.1<br>12<br>29<br>38<br>27      | 0.9<br>75<br>67<br>17<br>57 | d_<br>_B<br>act<br>eri<br>a | p__A<br>ctino<br>bacte<br>riota | c__Co<br>riobac<br>teriia | o__Cor<br>iobact<br>eriales       | f__Cori<br>obacteri<br>aceae             | g__Collins<br>ella                 | s__Collinsella<br>unknown_24<br>7                |
| MGYG-HGUT-02769:s__CAG-465 unknown unknown_2           | 0.2<br>10<br>00<br>22<br>75 | 0.3<br>50<br>40<br>42<br>47      | 0.8<br>91<br>82<br>55<br>59 | d_<br>_B<br>act<br>eri<br>a | p__Fi<br>rmicu<br>tes_A         | c__Clo<br>stridia         | o__TA<br>NB77                     | f__CAG-<br>465                           | g__CAG-<br>465<br>unknown          | s__CAG-465<br>unknown<br>unknown_2               |
| MGYG-HGUT-02770:s__Catenibacterium unknown_3           | 0.4<br>53<br>63<br>41<br>53 | -<br>0.2<br>07<br>19<br>14<br>12 | 0.9<br>63<br>90<br>51<br>5  | d_<br>_B<br>act<br>eri<br>a | p__Fi<br>rmicu<br>tes           | c__Ba<br>cilli            | o__Ery<br>sipelot<br>richale<br>s | f__Erysi<br>pelatocl<br>ostridia<br>ceae | g__Cateni<br>bacterium             | s__Catenibact<br>erium<br>unknown_3              |
| MGYG-HGUT-02772:s__Faecalicatena unknown_7             | 0.1<br>72<br>21<br>66<br>15 | 0.3<br>78<br>78<br>07<br>57      | 0.8<br>91<br>82<br>55<br>59 | d_<br>_B<br>act<br>eri<br>a | p__Fi<br>rmicu<br>tes_A         | c__Clo<br>stridia         | o__Lac<br>hnospi<br>rales         | f__Lach<br>nospirac<br>eae               | g__Faecali<br>catena               | s__Faecalicat<br>ena<br>unknown_7                |
| MGYG-HGUT-02773:s__CAG-245 sp000435175                 | 0.8<br>11<br>56<br>12<br>3  | -<br>0.0<br>66<br>38<br>65<br>86 | 0.9<br>87<br>14<br>23<br>02 | d_<br>_B<br>act<br>eri<br>a | p__Fi<br>rmicu<br>tes_A         | c__Clo<br>stridia         | o__TA<br>NB77                     | f__CAG-<br>508                           | g__CAG-<br>245                     | s__CAG-245<br>sp000435175                        |
| MGYG-HGUT-02776:s__Oscillospiraceae unknown unknown_14 | 0.1<br>34<br>44<br>77<br>04 | -<br>0.4<br>08<br>71<br>87<br>7  | 0.8<br>91<br>82<br>55<br>59 | d_<br>_B<br>act<br>eri<br>a | p__Fi<br>rmicu<br>tes_A         | c__Clo<br>stridia         | o__Os<br>cillospi<br>rales        | f__Oscil<br>lospirac<br>eae              | g__Oscillo<br>spiraceae<br>unknown | s__Oscillospir<br>aceae<br>unknown<br>unknown_14 |

|                                                 |                             |                                  |                             |                             |                                 |                           |                                   |                                |                               |                                        |
|-------------------------------------------------|-----------------------------|----------------------------------|-----------------------------|-----------------------------|---------------------------------|---------------------------|-----------------------------------|--------------------------------|-------------------------------|----------------------------------------|
| MGYG-HGUT-02778:s__Collinsella unknown_250      | 0.3<br>46<br>10<br>08<br>71 | 0.2<br>58<br>25<br>03<br>88      | 0.9<br>39<br>70<br>92<br>5  | d_<br>_B<br>act<br>eri<br>a | p__A<br>ctino<br>bacte<br>riota | c__Co<br>riobac<br>teriia | o__Cor<br>iobact<br>eriales       | f__Cori<br>obacteri<br>aceae   | g__Collins<br>ella            | s__Collinsella<br>unknown_25<br>0      |
| MGYG-HGUT-02779:s__Holdemania sp900120005       | 0.1<br>64<br>29<br>14<br>1  | -<br>0.3<br>82<br>15<br>97<br>77 | 0.8<br>91<br>82<br>55<br>59 | d_<br>_B<br>act<br>eri<br>a | p__Fi<br>rmicu<br>tes           | c__Ba<br>cilli            | o__Ery<br>sipelot<br>richale<br>s | f__Erysi<br>pelotric<br>haceae | g__Holde<br>mania             | s__Holdemania<br>sp900120005           |
| MGYG-HGUT-02780:s__Fournierella unknown_2       | 0.5<br>58<br>27<br>81<br>19 | -<br>0.1<br>60<br>32<br>52<br>93 | 0.9<br>68<br>53<br>20<br>73 | d_<br>_B<br>act<br>eri<br>a | p__Fi<br>rmicu<br>tes_A         | c__Clo<br>stridia         | o__Os<br>cillospi<br>rales        | f__Rumi<br>nococca<br>ceae     | g__Fourni<br>erella           | s__Fournierella<br>unknown_2           |
| MGYG-HGUT-02783:s__Prevotellamassilia unknown_7 | 0.0<br>24<br>98<br>85<br>87 | 0.6<br>20<br>08<br>11<br>5       | 0.7<br>68<br>22<br>58<br>34 | d_<br>_B<br>act<br>eri<br>a | p__B<br>acter<br>oidot<br>a     | c__Ba<br>cteroi<br>dia    | o__Bac<br>teroida<br>les          | f__Bact<br>eroidac<br>eae      | g__Prevot<br>ellamassili<br>a | s__Prevotella<br>massilia<br>unknown_7 |
| MGYG-HGUT-02785:s__Robinsoniella unknown_3      | 0.5<br>47<br>94<br>84<br>76 | 0.1<br>68<br>54<br>86<br>07      | 0.9<br>68<br>53<br>20<br>73 | d_<br>_B<br>act<br>eri<br>a | p__Fi<br>rmicu<br>tes_A         | c__Clo<br>stridia         | o__Lac<br>hnospi<br>rales         | f__Lach<br>nospirac<br>eae     | g__Robins<br>oniella          | s__Robinsoniella<br>unknown_3          |
| MGYG-HGUT-02794:s__CAG-83 sp003487665           | 0.7<br>07<br>40<br>23<br>53 | -<br>0.1<br>02<br>33<br>49<br>08 | 0.9<br>79<br>45<br>84<br>75 | d_<br>_B<br>act<br>eri<br>a | p__Fi<br>rmicu<br>tes_A         | c__Clo<br>stridia         | o__Os<br>cillospi<br>rales        | f__Oscil<br>lospirac<br>eae    | g__CAG-<br>83                 | s__CAG-83<br>sp003487665               |
| MGYG-HGUT-02796:s__CAG-273 sp000435755          | 0.8<br>49<br>85<br>96<br>49 | 0.0<br>50<br>97<br>36<br>19      | 0.9<br>92<br>87<br>80<br>88 | d_<br>_B<br>act<br>eri<br>a | p__Fi<br>rmicu<br>tes_A         | c__Clo<br>stridia         | o__TA<br>NB77                     | f__CAG-<br>508                 | g__CAG-<br>273                | s__CAG-273<br>sp000435755              |
| MGYG-HGUT-02797:s__CAG-508 unknown unknown_14   | 0.2<br>16<br>39<br>58<br>27 | 0.3<br>45<br>16<br>73<br>31      | 0.8<br>91<br>82<br>55<br>59 | d_<br>_B<br>act<br>eri<br>a | p__Fi<br>rmicu<br>tes_A         | c__Clo<br>stridia         | o__TA<br>NB77                     | f__CAG-<br>508                 | g__CAG-<br>508<br>unknown     | s__CAG-508<br>unknown<br>unknown_14    |
| MGYG-HGUT-02802:s__UBA1777 unknown_8            | 0.6<br>73<br>11<br>54<br>41 | 0.1<br>15<br>69<br>16<br>99      | 0.9<br>75<br>67<br>17<br>57 | d_<br>_B<br>act<br>eri<br>a | p__Fi<br>rmicu<br>tes_A         | c__Clo<br>stridia         | o__Os<br>cillospi<br>rales        | f__Oscil<br>lospirac<br>eae    | g__UBA17<br>77                | s__UBA1777<br>unknown_8                |

|                                                |                             |                                  |                             |                             |                                 |                                        |                             |                               |                         |                                       |
|------------------------------------------------|-----------------------------|----------------------------------|-----------------------------|-----------------------------|---------------------------------|----------------------------------------|-----------------------------|-------------------------------|-------------------------|---------------------------------------|
| MGYG-HGUT-02809:s__Faecalibacterium unknown_10 | 0.0<br>00<br>63<br>22<br>62 | 0.9<br>25<br>20<br>94<br>32      | 0.6<br>48<br>12<br>43<br>72 | d_<br>_B<br>act<br>eri<br>a | p__Fi<br>rmicu<br>tes_A         | c__Clo<br>stridia                      | o__Os<br>cillospi<br>rales  | f__Rumi<br>nococca<br>ceae    | g__Faecali<br>bacterium | s__Faecalibac<br>terium<br>unknown_10 |
| MGYG-HGUT-02816:s__Citrobacter braakii         | 0.6<br>58<br>86<br>81<br>98 | 0.1<br>23<br>31<br>68<br>68      | 0.9<br>75<br>67<br>17<br>57 | d_<br>_B<br>act<br>eri<br>a | p__Pr<br>oteob<br>acteri<br>a   | c__Ga<br>mmap<br>roteo<br>bacter<br>ia | o__Ent<br>erobac<br>terales | f__Ente<br>robacte<br>riaceae | g__Citroba<br>cter      | s__Citrobacte<br>r braakii            |
| MGYG-HGUT-02819:s__Veillonella tobetsuensis    | 0.9<br>82<br>55<br>77<br>11 | -<br>0.0<br>06<br>10<br>71<br>19 | 0.9<br>98<br>19<br>81<br>97 | d_<br>_B<br>act<br>eri<br>a | p__Fi<br>rmicu<br>tes_C         | c__Ne<br>gativic<br>utes               | o__Veil<br>lonella<br>les   | f__Veill<br>onellace<br>ae    | g__Veillon<br>ella      | s__Veillonella<br>tobetsuensis        |
| MGYG-HGUT-02823:s__Enterobacter bugandensis    | 0.4<br>14<br>37<br>36<br>54 | 0.2<br>22<br>78<br>68<br>08      | 0.9<br>39<br>70<br>92<br>5  | d_<br>_B<br>act<br>eri<br>a | p__Pr<br>oteob<br>acteri<br>a   | c__Ga<br>mmap<br>roteo<br>bacter<br>ia | o__Ent<br>erobac<br>terales | f__Ente<br>robacte<br>riaceae | g__Entero<br>bacter     | s__Enterobac<br>ter<br>bugandensis    |
| MGYG-HGUT-02824:s__Collinsella unknown_253     | 0.2<br>31<br>90<br>40<br>51 | -<br>0.3<br>33<br>75<br>37<br>12 | 0.9<br>02<br>18<br>13<br>67 | d_<br>_B<br>act<br>eri<br>a | p__A<br>ctino<br>bacte<br>riota | c__Co<br>riobac<br>teriia              | o__Cor<br>iobact<br>eriales | f__Cori<br>obacteri<br>aceae  | g__Collins<br>ella      | s__Collinsella<br>unknown_25<br>3     |
| MGYG-HGUT-02826:s__Streptococcus unknown_11    | 0.4<br>50<br>97<br>46<br>3  | 0.2<br>07<br>43<br>42<br>18      | 0.9<br>61<br>29<br>22<br>08 | d_<br>_B<br>act<br>eri<br>a | p__Fi<br>rmicu<br>tes           | c__Ba<br>cilli                         | o__Lac<br>tobacill<br>ales  | f__Stre<br>ptococc<br>aceae   | g__Strepto<br>coccus    | s__Streptococ<br>cus<br>unknown_11    |
| MGYG-HGUT-02831:s__CAG-349 sp003539515         | 0.1<br>37<br>43<br>88<br>37 | -<br>0.4<br>09<br>49<br>30<br>44 | 0.8<br>91<br>82<br>55<br>59 | d_<br>_B<br>act<br>eri<br>a | p__Fi<br>rmicu<br>tes_A         | c__Clo<br>stridia                      | o__4C<br>28d-15             | f__CAG-<br>917                | g__CAG-<br>349          | s__CAG-349<br>sp003539515             |
| MGYG-HGUT-02832:s__Prevotella unknown_35       | 0.9<br>49<br>67<br>12<br>56 | 0.0<br>17<br>50<br>31<br>19      | 0.9<br>94<br>47<br>94<br>74 | d_<br>_B<br>act<br>eri<br>a | p__B<br>acter<br>oidot<br>a     | c__Ba<br>cteroi<br>dia                 | o__Bac<br>teroida<br>les    | f__Bact<br>eroidac<br>eae     | g__Prevot<br>ella       | s__Prevotella<br>unknown_35           |
| MGYG-HGUT-02833:s__ER4 unknown_4               | 0.8<br>13<br>68<br>72<br>47 | 0.0<br>65<br>84<br>87<br>25      | 0.9<br>87<br>14<br>23<br>02 | d_<br>_B<br>act<br>eri<br>a | p__Fi<br>rmicu<br>tes_A         | c__Clo<br>stridia                      | o__Os<br>cillospi<br>rales  | f__Oscil<br>lospirac<br>eae   | g__ER4                  | s__ER4<br>unknown_4                   |

|                                               |                             |                                  |                             |                             |                                 |                           |                             |                              |                                    |                                              |
|-----------------------------------------------|-----------------------------|----------------------------------|-----------------------------|-----------------------------|---------------------------------|---------------------------|-----------------------------|------------------------------|------------------------------------|----------------------------------------------|
| MGYG-HGUT-02834:s__Prevotella unknown_36      | 0.6<br>63<br>43<br>00<br>96 | 0.1<br>13<br>10<br>98<br>28      | 0.9<br>75<br>67<br>17<br>57 | d_<br>_B<br>act<br>eri<br>a | p__B<br>acter<br>oidot<br>a     | c__Ba<br>cteroi<br>dia    | o__Bac<br>teroida<br>les    | f__Bact<br>eroidac<br>eae    | g__Prevot<br>ella                  | s__Prevotella<br>unknown_36                  |
| MGYG-HGUT-02835:s__Fusicatibacter unknown_1   | 0.5<br>36<br>24<br>65<br>5  | -<br>0.1<br>72<br>59<br>75<br>11 | 0.9<br>68<br>53<br>20<br>73 | d_<br>_B<br>act<br>eri<br>a | p__Fi<br>rmicu<br>tes_A         | c__Clo<br>stridia         | o__Lac<br>hnospi<br>rales   | f__Lach<br>nospirac<br>eae   | g__Fusicat<br>enibacter            | s__Fusicatibacter<br>unknown_1               |
| MGYG-HGUT-02837:s__Lachnospiraceae unknown_25 | 0.6<br>31<br>78<br>76<br>71 | 0.1<br>33<br>27<br>18<br>78      | 0.9<br>75<br>67<br>17<br>57 | d_<br>_B<br>act<br>eri<br>a | p__Fi<br>rmicu<br>tes_A         | c__Clo<br>stridia         | o__Lac<br>hnospi<br>rales   | f__Lach<br>nospirac<br>eae   | g__Lachno<br>spiraceae<br>unknown  | s__Lachnospiraceae<br>unknown<br>unknown_25  |
| MGYG-HGUT-02838:s__Faecalibacterium unknown_8 | 0.5<br>67<br>44<br>42<br>98 | -<br>0.1<br>56<br>90<br>41<br>98 | 0.9<br>71<br>33<br>90<br>3  | d_<br>_B<br>act<br>eri<br>a | p__Fi<br>rmicu<br>tes_A         | c__Clo<br>stridia         | o__Lac<br>hnospi<br>rales   | f__Lach<br>nospirac<br>eae   | g__Faecali<br>catena               | s__Faecalibacterium<br>unknown_8             |
| MGYG-HGUT-02839:s__Granulicatella sp001071995 | 0.8<br>82<br>37<br>60<br>63 | 0.0<br>41<br>57<br>29<br>43      | 0.9<br>94<br>47<br>94<br>74 | d_<br>_B<br>act<br>eri<br>a | p__Fi<br>rmicu<br>tes           | c__Ba<br>cilli            | o__Lac<br>tobacill<br>ales  | f__Aero<br>coccace<br>ae     | g__Granuli<br>catella              | s__Granulicatella<br>sp001071995             |
| MGYG-HGUT-02840:s__Oscillospira unknown_15    | 0.7<br>42<br>77<br>37<br>17 | 0.0<br>90<br>44<br>51<br>51      | 0.9<br>79<br>45<br>84<br>75 | d_<br>_B<br>act<br>eri<br>a | p__Fi<br>rmicu<br>tes_A         | c__Clo<br>stridia         | o__Os<br>cillospi<br>rales  | f__Oscil<br>lospirac<br>eae  | g__Oscillo<br>spiraceae<br>unknown | s__Oscillospiraceae<br>unknown<br>unknown_15 |
| MGYG-HGUT-02843:s__Streptococcus unknown_12   | 0.2<br>34<br>01<br>80<br>37 | 0.3<br>32<br>06<br>94<br>01      | 0.9<br>02<br>18<br>13<br>67 | d_<br>_B<br>act<br>eri<br>a | p__Fi<br>rmicu<br>tes           | c__Ba<br>cilli            | o__Lac<br>tobacill<br>ales  | f__Stre<br>ptococc<br>aceae  | g__Strepto<br>coccus               | s__Streptococcus<br>unknown_12               |
| MGYG-HGUT-02844:s__Collinsella unknown_254    | 0.3<br>14<br>99<br>84<br>08 | 0.2<br>73<br>27<br>72<br>7       | 0.9<br>29<br>02<br>59<br>13 | d_<br>_B<br>act<br>eri<br>a | p__A<br>ctino<br>bacte<br>riota | c__Co<br>riobac<br>teriia | o__Cor<br>iobact<br>eriales | f__Cori<br>obacteri<br>aceae | g__Collins<br>ella                 | s__Collinsella<br>unknown_254                |
| MGYG-HGUT-02845:s__Dorea unknown_3            | 0.0<br>74<br>66<br>47<br>63 | -<br>0.4<br>94<br>35<br>24<br>07 | 0.8<br>77<br>82<br>62<br>47 | d_<br>_B<br>act<br>eri<br>a | p__Fi<br>rmicu<br>tes_A         | c__Clo<br>stridia         | o__Lac<br>hnospi<br>rales   | f__Lach<br>nospirac<br>eae   | g__Dorea                           | s__Dorea<br>unknown_3                        |

|                                                          |             |              |             |               |                     |                   |                         |                         |                               |                                          |
|----------------------------------------------------------|-------------|--------------|-------------|---------------|---------------------|-------------------|-------------------------|-------------------------|-------------------------------|------------------------------------------|
| MGYG-HGUT-02848:s__Acutalibacteraceae unknown unknown_36 | 0.589795409 | -0.150108691 | 0.975671757 | d__Bacteriota | p__Firmicutes_A     | c__Clostridia     | o__Oscillospirales      | f__Acutalibacteraceae   | g__Acutalibacteraceae unknown | s__Acutalibacteraceae unknown unknown_36 |
| MGYG-HGUT-02854:s__Clostridium_U unknown_2               | 0.116271283 | -0.435517885 | 0.883307256 | d__Bacteriota | p__Firmicutes_A     | c__Clostridia     | o__Peptostreptococcales | f__Peptostreptococaceae | g__Clostridium_U              | s__Clostridium_U unknown_2               |
| MGYG-HGUT-02863:s__Agathobaculum desmolans               | 0.682221639 | -0.114089821 | 0.975671757 | d__Bacteriota | p__Firmicutes_A     | c__Clostridia     | o__Oscillospirales      | f__Butyriricocaceae     | g__Agathobaculum              | s__Agathobaculum desmolans               |
| MGYG-HGUT-02864:s__Collinsella unknown_265               | 0.066426414 | 0.48874676   | 0.866452571 | d__Bacteriota | p__Actinobacteriota | c__Coriobacteriia | o__Coriobacteriales     | f__Coriobacteriaceae    | g__Collinsella                | s__Collinsella unknown_265               |
| MGYG-HGUT-02867:s__Alistipes unknown_11                  | 0.077384565 | 0.476560375  | 0.877826247 | d__Bacteriota | p__Bacteroidota     | c__Bacteroidia    | o__Bacteroidales        | f__Rikenellaceae        | g__Alistipes                  | s__Alistipes unknown_11                  |
| MGYG-HGUT-02869:s__Collinsella unknown_267               | 0.75795388  | 0.086274009  | 0.979458475 | d__Bacteriota | p__Actinobacteriota | c__Coriobacteriia | o__Coriobacteriales     | f__Coriobacteriaceae    | g__Collinsella                | s__Collinsella unknown_267               |
| MGYG-HGUT-02871:s__Collinsella unknown_268               | 0.061952082 | 0.516229423  | 0.85721132  | d__Bacteriota | p__Actinobacteriota | c__Coriobacteriia | o__Coriobacteriales     | f__Coriobacteriaceae    | g__Collinsella                | s__Collinsella unknown_268               |
| MGYG-HGUT-02872:s__CAG-272 unknown unknown_18            | 0.561656619 | 0.160059962  | 0.97133903  | d__Bacteriota | p__Firmicutes_A     | c__Clostridia     | o__Oscillospirales      | f__CAG-272              | g__CAG-272 unknown            | s__CAG-272 unknown unknown_18            |
| MGYG-HGUT-02874:s__UBA1777 sp002320035                   | 0.308858023 | 0.28007312   | 0.929025913 | d__Bacteriota | p__Firmicutes_A     | c__Clostridia     | o__Oscillospirales      | f__Oscillospiraceae     | g__UBA1777                    | s__UBA1777 sp002320035                   |

|                                                                  |                             |                                  |                             |                             |                                 |                                 |                                     |                                               |                                                             |                                                               |
|------------------------------------------------------------------|-----------------------------|----------------------------------|-----------------------------|-----------------------------|---------------------------------|---------------------------------|-------------------------------------|-----------------------------------------------|-------------------------------------------------------------|---------------------------------------------------------------|
| MGYG-HGUT-02876:s__CAG-145 sp000435715                           | 0.4<br>95<br>16<br>14<br>06 | -<br>0.1<br>83<br>53<br>86<br>33 | 0.9<br>68<br>53<br>20<br>73 | d_<br>_B<br>act<br>eri<br>a | p__Fi<br>rmicu<br>tes_A         | c__Clo<br>stridia               | o__Pe<br>ptostre<br>ptococ<br>cales | f__Anae<br>rovorac<br>aceae                   | g__CAG-<br>145                                              | s__CAG-145<br>sp000435715                                     |
| MGYG-HGUT-02878:s__RC9 unknown_8                                 | 0.9<br>25<br>74<br>28<br>03 | -<br>0.0<br>26<br>04<br>56       | 0.9<br>94<br>47<br>94<br>74 | d_<br>_B<br>act<br>eri<br>a | p__B<br>acter<br>oidot<br>a     | c__Ba<br>cteroi<br>dia          | o__Bac<br>teroida<br>les            | f__UBA<br>932                                 | g__RC9                                                      | s__RC9<br>unknown_8                                           |
| MGYG-HGUT-02880:s__Ruminococcus_D unknown_4                      | 0.1<br>73<br>95<br>47<br>07 | -<br>0.3<br>78<br>85<br>25<br>12 | 0.8<br>91<br>82<br>55<br>59 | d_<br>_B<br>act<br>eri<br>a | p__Fi<br>rmicu<br>tes_A         | c__Clo<br>stridia               | o__Os<br>cillospi<br>rales          | f__Rumi<br>nococca<br>ceae                    | g__Rumin<br>ococcus_D                                       | s__Ruminoco<br>ccus_D<br>unknown_4                            |
| MGYG-HGUT-02882:s__CAG-83 sp000435975                            | 0.0<br>98<br>84<br>66<br>12 | 0.4<br>40<br>82<br>51<br>55      | 0.8<br>83<br>30<br>72<br>56 | d_<br>_B<br>act<br>eri<br>a | p__Fi<br>rmicu<br>tes_A         | c__Clo<br>stridia               | o__Os<br>cillospi<br>rales          | f__Oscil<br>lospirac<br>eae                   | g__CAG-<br>83                                               | s__CAG-83<br>sp000435975                                      |
| MGYG-HGUT-02883:s__Gastranaerophilales unknown unknown unknown_3 | 0.2<br>10<br>21<br>59<br>97 | 0.3<br>48<br>54<br>37<br>58      | 0.8<br>91<br>82<br>55<br>59 | d_<br>_B<br>act<br>eri<br>a | p__C<br>yano<br>bacte<br>ria    | c__Va<br>mpiro<br>vibrio<br>nia | o__Ga<br>strana<br>erophil<br>ales  | f__Gast<br>ranaero<br>philales<br>unknow<br>n | g__Gastr<br>naerophi<br>lales<br>unknow<br>n<br>unknow<br>n | s__Gastranae<br>rophilales<br>unknown<br>unknown<br>unknown_3 |
| MGYG-HGUT-02905:s__CAG-279 unknown_5                             | 0.1<br>77<br>59<br>16<br>32 | -<br>0.3<br>74<br>31<br>80<br>24 | 0.8<br>91<br>82<br>55<br>59 | d_<br>_B<br>act<br>eri<br>a | p__B<br>acter<br>oidot<br>a     | c__Ba<br>cteroi<br>dia          | o__Bac<br>teroida<br>les            | f__Muri<br>baculac<br>eae                     | g__CAG-<br>279                                              | s__CAG-279<br>unknown_5                                       |
| MGYG-HGUT-02906:s__UBA2856 unknown_1                             | 0.7<br>85<br>07<br>27<br>78 | -<br>0.0<br>76<br>68<br>08<br>2  | 0.9<br>81<br>19<br>42<br>11 | d_<br>_B<br>act<br>eri<br>a | p__Fi<br>rmicu<br>tes_A         | c__Clo<br>stridia               | o__Lac<br>hnospi<br>rales           | f__Lach<br>nospi<br>rac<br>eae                | g__UBA28<br>56                                              | s__UBA2856<br>unknown_1                                       |
| MGYG-HGUT-02911:s__Collinsella unknown_269                       | 0.1<br>66<br>97<br>87       | 0.3<br>79<br>81<br>80<br>64      | 0.8<br>91<br>82<br>55<br>59 | d_<br>_B<br>act<br>eri<br>a | p__A<br>ctino<br>bacte<br>riota | c__Co<br>riobac<br>teriia       | o__Cor<br>iobact<br>eriales         | f__Cori<br>obacteri<br>aceae                  | g__Collins<br>ella                                          | s__Collinsella<br>unknown_26<br>9                             |
| MGYG-HGUT-02913:s__CAG-382 unknown unknown_5                     | 0.6<br>94<br>96             | 0.1<br>08<br>74                  | 0.9<br>79<br>42             | d_<br>_B<br>act             | p__Fi<br>rmicu<br>tes_A         | c__Clo<br>stridia               | o__Os<br>cillospi<br>rales          | f__CAG-<br>382                                | g__CAG-<br>382<br>unknown                                   | s__CAG-382<br>unknown<br>unknown_5                            |

|                                                 |                             |                                  |                             |                             |                                 |                           |                             |                              |                               |                                        |
|-------------------------------------------------|-----------------------------|----------------------------------|-----------------------------|-----------------------------|---------------------------------|---------------------------|-----------------------------|------------------------------|-------------------------------|----------------------------------------|
|                                                 | 80<br>71                    | 14<br>69                         | 26<br>69                    | eri<br>a                    |                                 |                           |                             |                              |                               |                                        |
| MGYG-HGUT-02917:s__Collinsella unknown_272      | 0.9<br>66<br>97<br>78<br>54 | -<br>0.0<br>11<br>22<br>93<br>56 | 0.9<br>94<br>47<br>94<br>74 | d_<br>_B<br>act<br>eri<br>a | p__A<br>ctino<br>bacte<br>riota | c__Co<br>riobac<br>teriia | o__Cor<br>iobact<br>eriales | f__Cori<br>obacteri<br>aceae | g__Collins<br>ella            | s__Collinsella<br>unknown_27<br>2      |
| MGYG-HGUT-02918:s__Collinsella unknown_273      | 0.3<br>05<br>44<br>65<br>37 | 0.2<br>84<br>00<br>08<br>03      | 0.9<br>29<br>02<br>59<br>13 | d_<br>_B<br>act<br>eri<br>a | p__A<br>ctino<br>bacte<br>riota | c__Co<br>riobac<br>teriia | o__Cor<br>iobact<br>eriales | f__Cori<br>obacteri<br>aceae | g__Collins<br>ella            | s__Collinsella<br>unknown_27<br>3      |
| MGYG-HGUT-02920:s__CAG-485 unknown_12           | 0.3<br>16<br>23<br>30<br>24 | 0.2<br>76<br>67<br>72<br>53      | 0.9<br>29<br>02<br>59<br>13 | d_<br>_B<br>act<br>eri<br>a | p__B<br>acter<br>oidot<br>a     | c__Ba<br>cteroi<br>dia    | o__Bac<br>teroida<br>les    | f__Muri<br>baculac<br>eae    | g__CAG-<br>485                | s__CAG-485<br>unknown_12               |
| MGYG-HGUT-02921:s__Collinsella unknown_274      | 0.9<br>49<br>88<br>31<br>18 | 0.0<br>17<br>37<br>67<br>3       | 0.9<br>94<br>47<br>94<br>74 | d_<br>_B<br>act<br>eri<br>a | p__A<br>ctino<br>bacte<br>riota | c__Co<br>riobac<br>teriia | o__Cor<br>iobact<br>eriales | f__Cori<br>obacteri<br>aceae | g__Collins<br>ella            | s__Collinsella<br>unknown_27<br>4      |
| MGYG-HGUT-02925:s__CAG-877 unknown_6            | 0.5<br>25<br>40<br>06<br>92 | 0.1<br>77<br>67<br>74<br>34      | 0.9<br>68<br>53<br>20<br>73 | d_<br>_B<br>act<br>eri<br>a | p__Fi<br>rmicu<br>tes           | c__Ba<br>cilli            | o__RF<br>39                 | f__CAG-<br>611               | g__CAG-<br>877                | s__CAG-877<br>unknown_6                |
| MGYG-HGUT-02926:s__CAG-83 sp000431575           | 0.1<br>20<br>11<br>39<br>69 | 0.4<br>31<br>18<br>12<br>58      | 0.8<br>83<br>30<br>72<br>56 | d_<br>_B<br>act<br>eri<br>a | p__Fi<br>rmicu<br>tes_A         | c__Clo<br>stridia         | o__Os<br>cillospi<br>rales  | f__Oscil<br>lospirac<br>eae  | g__CAG-<br>83                 | s__CAG-83<br>sp000431575               |
| MGYG-HGUT-02929:s__Collinsella unknown_278      | 0.0<br>25<br>04<br>28<br>05 | 0.6<br>18<br>63<br>19<br>04      | 0.7<br>68<br>22<br>58<br>34 | d_<br>_B<br>act<br>eri<br>a | p__A<br>ctino<br>bacte<br>riota | c__Co<br>riobac<br>teriia | o__Cor<br>iobact<br>eriales | f__Cori<br>obacteri<br>aceae | g__Collins<br>ella            | s__Collinsella<br>unknown_27<br>8      |
| MGYG-HGUT-02930:s__Prevotellamassilia unknown_8 | 0.6<br>75<br>31<br>15<br>6  | 0.1<br>16<br>90<br>65<br>64      | 0.9<br>75<br>67<br>17<br>57 | d_<br>_B<br>act<br>eri<br>a | p__B<br>acter<br>oidot<br>a     | c__Ba<br>cteroi<br>dia    | o__Bac<br>teroida<br>les    | f__Bact<br>eroidac<br>eae    | g__Prevot<br>ellamassili<br>a | s__Prevotella<br>massilia<br>unknown_8 |
| MGYG-HGUT-02932:s__Collinsella unknown_279      | 0.0<br>32<br>42<br>04<br>47 | 0.5<br>74<br>97<br>73<br>04      | 0.7<br>68<br>22<br>58<br>34 | d_<br>_B<br>act<br>eri<br>a | p__A<br>ctino<br>bacte<br>riota | c__Co<br>riobac<br>teriia | o__Cor<br>iobact<br>eriales | f__Cori<br>obacteri<br>aceae | g__Collins<br>ella            | s__Collinsella<br>unknown_27<br>9      |



|                                                       |                             |                                  |                             |                             |                                 |                           |                             |                                |                                   |                                       |
|-------------------------------------------------------|-----------------------------|----------------------------------|-----------------------------|-----------------------------|---------------------------------|---------------------------|-----------------------------|--------------------------------|-----------------------------------|---------------------------------------|
| MGYG-HGUT-02933:s__Bacteroides_A unknown_12           | 0.5<br>27<br>49<br>02<br>02 | 0.1<br>71<br>90<br>33<br>25      | 0.9<br>68<br>53<br>20<br>73 | d_<br>_B<br>act<br>eri<br>a | p__B<br>acter<br>oidot<br>a     | c__Ba<br>cteroi<br>dia    | o__Bac<br>teroida<br>les    | f__Bact<br>eroidac<br>eae      | g__Bacter<br>oides_A              | s__Bacteroides_A unknown_12           |
| MGYG-HGUT-02935:s__Bacteroides_A sp002161765          | 0.4<br>12<br>57<br>45<br>58 | 0.2<br>22<br>26<br>62<br>1       | 0.9<br>39<br>70<br>92<br>5  | d_<br>_B<br>act<br>eri<br>a | p__B<br>acter<br>oidot<br>a     | c__Ba<br>cteroi<br>dia    | o__Bac<br>teroida<br>les    | f__Bact<br>eroidac<br>eae      | g__Bacter<br>oides_A              | s__Bacteroides_A sp002161765          |
| MGYG-HGUT-02938:s__Clostridium_B unknown              | 0.4<br>25<br>91<br>42<br>09 | -<br>0.2<br>18<br>44<br>46<br>42 | 0.9<br>48<br>39<br>70<br>24 | d_<br>_B<br>act<br>eri<br>a | p__Fi<br>rmicu<br>tes_A         | c__Clo<br>stridia         | o__Clo<br>stridial<br>es    | f__Clost<br>ridiaceae          | g__Clostri<br>dium_B              | s__Clostridium_B unknown              |
| MGYG-HGUT-02941:s__Actinomyces graevenitzii_1         | 0.6<br>90<br>73<br>71<br>31 | 0.1<br>09<br>29<br>06<br>64      | 0.9<br>75<br>76<br>85<br>79 | d_<br>_B<br>act<br>eri<br>a | p__A<br>ctino<br>bacte<br>riota | c__Ac<br>tinoba<br>cteria | o__Act<br>inomyc<br>etales  | f__Actin<br>omycet<br>aceae    | g__Actino<br>myces                | s__Actinomyces graevenitzii_1         |
| MGYG-HGUT-02943:s__Actinomyces viscosus               | 0.7<br>74<br>05<br>19<br>23 | 0.0<br>77<br>66<br>51<br>29      | 0.9<br>79<br>52<br>04<br>84 | d_<br>_B<br>act<br>eri<br>a | p__A<br>ctino<br>bacte<br>riota | c__Ac<br>tinoba<br>cteria | o__Act<br>inomyc<br>etales  | f__Actin<br>omycet<br>aceae    | g__Actino<br>myces                | s__Actinomyces viscosus               |
| MGYG-HGUT-02945:s__Bariatricus massiliensis           | 0.3<br>32<br>24<br>70<br>24 | -<br>0.2<br>71<br>53<br>23<br>35 | 0.9<br>30<br>62<br>46<br>92 | d_<br>_B<br>act<br>eri<br>a | p__Fi<br>rmicu<br>tes_A         | c__Clo<br>stridia         | o__Lac<br>hnospi<br>rales   | f__Lach<br>nospi<br>rac<br>eae | g__Bariatric<br>us                | s__Bariatricus massiliensis           |
| MGYG-HGUT-02946:s__Clostridium_M unknown_13           | 0.0<br>56<br>34<br>96<br>46 | -<br>0.5<br>25<br>52<br>93<br>81 | 0.8<br>57<br>21<br>13<br>2  | d_<br>_B<br>act<br>eri<br>a | p__Fi<br>rmicu<br>tes_A         | c__Clo<br>stridia         | o__Lac<br>hnospi<br>rales   | f__Lach<br>nospi<br>rac<br>eae | g__Clostri<br>dium_M              | s__Clostridium_M unknown_13           |
| MGYG-HGUT-02947:s__Collinsella unknown_281            | 0.0<br>28<br>45<br>61<br>18 | 0.5<br>93<br>90<br>31<br>35      | 0.7<br>68<br>22<br>58<br>34 | d_<br>_B<br>act<br>eri<br>a | p__A<br>ctino<br>bacte<br>riota | c__Co<br>riobac<br>teriia | o__Cor<br>iobact<br>eriales | f__Cori<br>obacteri<br>aceae   | g__Collins<br>ella                | s__Collinsella unknown_281            |
| MGYG-HGUT-02949:s__Lachnospiraceae unknown unknown_26 | 0.4<br>59<br>89<br>94<br>25 | 0.2<br>07<br>31<br>27<br>76      | 0.9<br>65<br>57<br>46<br>92 | d_<br>_B<br>act<br>eri<br>a | p__Fi<br>rmicu<br>tes_A         | c__Clo<br>stridia         | o__Lac<br>hnospi<br>rales   | f__Lach<br>nospi<br>rac<br>eae | g__Lachno<br>spiraceae<br>unknown | s__Lachnospiraceae unknown unknown_26 |

|                                                       |                             |                                  |                             |                             |                                 |                           |                                     |                                |                                   |                                                 |
|-------------------------------------------------------|-----------------------------|----------------------------------|-----------------------------|-----------------------------|---------------------------------|---------------------------|-------------------------------------|--------------------------------|-----------------------------------|-------------------------------------------------|
| MGYG-HGUT-02954:s__UBA1191 unknown_3                  | 0.0<br>01<br>48<br>33<br>23 | 0.8<br>52<br>46<br>28<br>17      | 0.6<br>48<br>12<br>43<br>72 | d_<br>_B<br>act<br>eri<br>a | p__Fi<br>rmicu<br>tes_A         | c__Clo<br>stridia         | o__Pe<br>ptostre<br>ptococ<br>cales | f__Anae<br>rovorac<br>aceae    | g__UBA11<br>91                    | s__UBA1191<br>unknown_3                         |
| MGYG-HGUT-02957:s__Eggerthellaceae unknown unknown_10 | 0.3<br>56<br>87<br>85<br>73 | 0.2<br>56<br>93<br>69<br>52      | 0.9<br>39<br>70<br>92<br>5  | d_<br>_B<br>act<br>eri<br>a | p__A<br>ctino<br>bacte<br>riota | c__Co<br>riobac<br>teriia | o__Cor<br>iobact<br>eriales         | f__Egge<br>rthellac<br>eae     | g__Eggert<br>hellaceae<br>unknown | s__Eggerthell<br>aceae<br>unknown<br>unknown_10 |
| MGYG-HGUT-02960:s__Prevotella unknown_38              | 0.5<br>03<br>20<br>98<br>48 | 0.1<br>81<br>73<br>58<br>62      | 0.9<br>68<br>53<br>20<br>73 | d_<br>_B<br>act<br>eri<br>a | p__B<br>acter<br>oidot<br>a     | c__Ba<br>cteroi<br>dia    | o__Bac<br>teroida<br>les            | f__Bact<br>eroidac<br>eae      | g__Prevot<br>ella                 | s__Prevotella<br>unknown_38                     |
| MGYG-HGUT-02962:s__Clostridium unknown_5              | 0.9<br>23<br>95<br>39<br>63 | -<br>0.0<br>26<br>79<br>36<br>3  | 0.9<br>94<br>47<br>94<br>74 | d_<br>_B<br>act<br>eri<br>a | p__Fi<br>rmicu<br>tes_A         | c__Clo<br>stridia         | o__Clo<br>stridial<br>es            | f__Clost<br>ridiaceae          | g__Clostri<br>dium                | s__Clostridiu<br>m<br>unknown_5                 |
| MGYG-HGUT-02966:s__Blautia_A unknown_15               | 0.4<br>32<br>38<br>14<br>99 | -<br>0.2<br>18<br>94<br>42<br>94 | 0.9<br>50<br>80<br>65<br>94 | d_<br>_B<br>act<br>eri<br>a | p__Fi<br>rmicu<br>tes_A         | c__Clo<br>stridia         | o__Lac<br>hnospi<br>rales           | f__Lach<br>nospi<br>rac<br>eae | g__Blautia<br>_A                  | s__Blautia_A<br>unknown_15                      |
| MGYG-HGUT-02968:s__Collinsella unknown_285            | 0.1<br>03<br>54<br>62<br>64 | 0.4<br>52<br>35<br>59<br>5       | 0.8<br>83<br>30<br>72<br>56 | d_<br>_B<br>act<br>eri<br>a | p__A<br>ctino<br>bacte<br>riota | c__Co<br>riobac<br>teriia | o__Cor<br>iobact<br>eriales         | f__Cori<br>obacteri<br>aceae   | g__Collins<br>ella                | s__Collinsella<br>unknown_28<br>5               |
| MGYG-HGUT-02973:s__UBA7096 unknown_5                  | 0.4<br>18<br>58<br>34<br>15 | 0.2<br>23<br>71<br>39<br>14      | 0.9<br>39<br>70<br>92<br>5  | d_<br>_B<br>act<br>eri<br>a | p__Fi<br>rmicu<br>tes_A         | c__Clo<br>stridia         | o__Lac<br>hnospi<br>rales           | f__Lach<br>nospi<br>rac<br>eae | g__UBA70<br>96                    | s__UBA7096<br>unknown_5                         |
| MGYG-HGUT-02978:s__Collinsella unknown_288            | 0.2<br>46<br>14<br>66<br>81 | 0.3<br>23<br>79<br>81<br>09      | 0.9<br>02<br>18<br>13<br>67 | d_<br>_B<br>act<br>eri<br>a | p__A<br>ctino<br>bacte<br>riota | c__Co<br>riobac<br>teriia | o__Cor<br>iobact<br>eriales         | f__Cori<br>obacteri<br>aceae   | g__Collins<br>ella                | s__Collinsella<br>unknown_28<br>8               |
| MGYG-HGUT-02982:s__Streptococcus unknown_14           | 0.4<br>32<br>54<br>89<br>53 | 0.2<br>17<br>33<br>48<br>82      | 0.9<br>50<br>80<br>65<br>94 | d_<br>_B<br>act<br>eri<br>a | p__Fi<br>rmicu<br>tes           | c__Ba<br>cilli            | o__Lac<br>tobacill<br>ales          | f__Stre<br>ptococc<br>aceae    | g__Strepto<br>coccus              | s__Streptococ<br>cus<br>unknown_14              |

|                                                 |             |               |             |               |                     |                   |                     |                      |                   |                                 |
|-------------------------------------------------|-------------|---------------|-------------|---------------|---------------------|-------------------|---------------------|----------------------|-------------------|---------------------------------|
| MGYG-HGUT-02985:s__Blautia_A unknown_16         | 0.5368779   | 0.17070613    | 0.968532073 | d__Bacteriata | p__Firmicutes_A     | c__Clostridia     | o__Lachnospirales   | f__Lachnospiraceae   | g__Blautia_A      | s__Blautia_A unknown_16         |
| MGYG-HGUT-02986:s__Gemella sanguinis            | 0.729677483 | 0.094221019   | 0.979458475 | d__Bacteriata | p__Firmicutes       | c__Bacilli        | o__Staphylococcales | f__Gemellaceae       | g__Gemella        | s__Gemella sanguinis            |
| MGYG-HGUT-02988:s__Pauljensenia unknown_6       | 0.33204158  | 0.27118624661 | 0.930624692 | d__Bacteriata | p__Actinobacteriota | c__Actinobacteria | o__Actinomycetales  | f__Actinomycetaceae  | g__Pauljensenia   | s__Pauljensenia unknown_6       |
| MGYG-HGUT-02989:s__Marvinbryantia unknown_3     | 0.994704406 | 0.001821802   | 0.998803346 | d__Bacteriata | p__Firmicutes_A     | c__Clostridia     | o__Lachnospirales   | f__Lachnospiraceae   | g__Marvinbryantia | s__Marvinbryantia unknown_3     |
| MGYG-HGUT-02990:s__Allisonella histaminiformans | 0.859531282 | -0.049245771  | 0.992878088 | d__Bacteriata | p__Firmicutes_C     | c__Negativicutes  | o__Veillonellales   | f__Dialisteraceae    | g__Allisonella    | s__Allisonella histaminiformans |
| MGYG-HGUT-02991:s__Collinsella unknown_289      | 0.716571023 | -0.10190486   | 0.979458475 | d__Bacteriata | p__Actinobacteriota | c__Coriobacteriia | o__Coriobacteriales | f__Coriobacteriaceae | g__Collinsella    | s__Collinsella unknown_289      |
| MGYG-HGUT-02992:s__Dorea unknown_4              | 0.278573901 | 0.28451763    | 0.929025913 | d__Bacteriata | p__Firmicutes_A     | c__Clostridia     | o__Lachnospirales   | f__Lachnospiraceae   | g__Dorea          | s__Dorea unknown_4              |
| MGYG-HGUT-02993:s__CAG-170 sp000432135          | 0.998349792 | -0.000550796  | 0.998843763 | d__Bacteriata | p__Firmicutes_A     | c__Clostridia     | o__Oscillospirales  | f__Oscillospiraceae  | g__CAG-170        | s__CAG-170 sp000432135          |
| MGYG-HGUT-02995:s__Clostridium_M unknown_14     | 0.476214441 | -0.197929273  | 0.968532073 | d__Bacteriata | p__Firmicutes_A     | c__Clostridia     | o__Lachnospirales   | f__Lachnospiraceae   | g__Clostridium_M  | s__Clostridium_M unknown_14     |

|                                                      |                             |                                                          |                             |                             |                                 |                           |                             |                                |                                  |                                             |
|------------------------------------------------------|-----------------------------|----------------------------------------------------------|-----------------------------|-----------------------------|---------------------------------|---------------------------|-----------------------------|--------------------------------|----------------------------------|---------------------------------------------|
|                                                      |                             | 10<br>17                                                 |                             |                             |                                 |                           |                             |                                |                                  |                                             |
| MGYG-HGUT-03001:s__Stomatobaculum longum             | 0.8<br>64<br>15<br>6        | 0.0<br>46<br>95<br>80<br>13                              | 0.9<br>94<br>47<br>94<br>74 | d_<br>_B<br>act<br>eri<br>a | p__Fi<br>rmicu<br>tes_A         | c__Clo<br>stridia         | o__Lac<br>hnospi<br>rales   | f__Lach<br>nospi<br>rac<br>eae | g__Stomat<br>obaculum            | s__Stomatob<br>aculum<br>longum             |
| MGYG-HGUT-03002:s__Streptococcus unknown_15          | 0.6<br>16<br>60<br>38<br>43 | -<br>0.1<br>75<br>37<br>67<br>46<br>17<br>93<br>57<br>82 | 0.9<br>75<br>67<br>17<br>57 | d_<br>_B<br>act<br>eri<br>a | p__Fi<br>rmicu<br>tes           | c__Ba<br>cilli            | o__Lac<br>tobacill<br>ales  | f__Stre<br>ptococ<br>caceae    | g__Strepto<br>coccus             | s__Streptococ<br>cus<br>unknown_15          |
| MGYG-HGUT-03004:s__Anaeromassilibacillus sp001305115 | 0.3<br>13<br>26<br>34<br>43 | 0.2<br>76<br>78<br>47<br>49                              | 0.9<br>29<br>02<br>59<br>13 | d_<br>_B<br>act<br>eri<br>a | p__Fi<br>rmicu<br>tes_A         | c__Clo<br>stridia         | o__Os<br>cillospi<br>rales  | f__Acut<br>alibacte<br>raceae  | g__Anaero<br>massilibaci<br>llus | s__Anaeroma<br>ssilibacillus<br>sp001305115 |
| MGYG-HGUT-03005:s__Ruminococcus unknown_6            | 0.5<br>25<br>11<br>52<br>03 | -<br>0.1<br>68<br>70<br>57<br>20<br>12<br>73<br>79       | 0.9<br>68<br>53<br>20<br>73 | d_<br>_B<br>act<br>eri<br>a | p__Fi<br>rmicu<br>tes_A         | c__Clo<br>stridia         | o__Os<br>cillospi<br>rales  | f__Rumi<br>nococca<br>ceae     | g__Rumin<br>ococcus              | s__Ruminoco<br>ccus<br>unknown_6            |
| MGYG-HGUT-03007:s__Collinsella unknown_291           | 0.1<br>58<br>02<br>91<br>55 | 0.3<br>80<br>41<br>62<br>65                              | 0.8<br>91<br>82<br>55<br>59 | d_<br>_B<br>act<br>eri<br>a | p__A<br>ctino<br>bacte<br>riota | c__Co<br>riobac<br>teriia | o__Cor<br>iobact<br>eriales | f__Cori<br>obacteri<br>aceae   | g__Collins<br>ella               | s__Collinsella<br>unknown_29<br>1           |
| MGYG-HGUT-03010:s__Granulicatella unknown_2          | 0.6<br>70<br>27<br>10<br>8  | -<br>0.1<br>75<br>17<br>48<br>34<br>57<br>79             | 0.9<br>75<br>67<br>17<br>57 | d_<br>_B<br>act<br>eri<br>a | p__Fi<br>rmicu<br>tes           | c__Ba<br>cilli            | o__Lac<br>tobacill<br>ales  | f__Aero<br>coccace<br>ae       | g__Granuli<br>catella            | s__Granulicat<br>ella<br>unknown_2          |
| MGYG-HGUT-03012:s__Blautia_A unknown_17              | 0.3<br>80<br>28<br>22<br>26 | 0.2<br>44<br>41<br>33<br>66                              | 0.9<br>39<br>70<br>92<br>5  | d_<br>_B<br>act<br>eri<br>a | p__Fi<br>rmicu<br>tes_A         | c__Clo<br>stridia         | o__Lac<br>hnospi<br>rales   | f__Lach<br>nospi<br>rac<br>eae | g__Blautia<br>_A                 | s__Blautia_A<br>unknown_17                  |
| MGYG-HGUT-03014:s__Actinomyces graevenitzii_2        | 0.9<br>58<br>87<br>49<br>67 | 0.0<br>14<br>46<br>08<br>85                              | 0.9<br>94<br>47<br>94<br>74 | d_<br>_B<br>act<br>eri<br>a | p__A<br>ctino<br>bacte<br>riota | c__Ac<br>tinoba<br>cteria | o__Act<br>inomyc<br>etales  | f__Actin<br>omycet<br>aceae    | g__Actino<br>myces               | s__Actinomyc<br>es<br>graevenitzii_2        |
| MGYG-HGUT-03015:s__Haemophilus_D unknown_6           | 0.5<br>51<br>03             | -<br>0.1<br>66                                           | 0.9<br>68<br>53             | d_<br>_B<br>act             | p__Pr<br>oteob                  | c__Ga<br>mmap<br>roteo    | o__Ent<br>erobac<br>terales | f__Past<br>eurellac<br>eae     | g__Haemo<br>philus_D             | s__Haemophi<br>lus_D<br>unknown_6           |

|                                                    |                             |                                              |                             |                             |                                 |                           |                             |                              |                    |                                   |  |
|----------------------------------------------------|-----------------------------|----------------------------------------------|-----------------------------|-----------------------------|---------------------------------|---------------------------|-----------------------------|------------------------------|--------------------|-----------------------------------|--|
| hilus_D<br>unknown_6                               | 89<br>22                    | 87<br>66<br>24                               | 20<br>73                    | eri<br>a                    | acteri<br>a                     | bacter<br>ia              |                             |                              |                    |                                   |  |
| MGYG-HGUT-<br>03018:s__Alistipes<br>_A unknown_1   | 0.5<br>52<br>63<br>44<br>54 | -<br>0.1<br>68<br>65<br>53<br>20<br>58<br>73 | 0.9<br>68<br>53<br>20<br>73 | d_<br>_B<br>act<br>eri<br>a | p__B<br>acter<br>oidot<br>a     | c__Ba<br>cteroi<br>dia    | o__Bac<br>teroida<br>les    | f__Rike<br>nellacea<br>e     | g__Alistipe<br>s_A | s__Alistipes_<br>A unknown_1      |  |
| MGYG-HGUT-<br>03020:s__Collinsell<br>a unknown_293 | 0.3<br>65<br>29<br>44<br>82 | 0.2<br>36<br>62<br>84<br>29                  | 0.9<br>39<br>70<br>92<br>5  | d_<br>_B<br>act<br>eri<br>a | p__A<br>ctino<br>bacte<br>riota | c__Co<br>riobac<br>teriia | o__Cor<br>iobact<br>eriales | f__Cori<br>obacteri<br>aceae | g__Collins<br>ella | s__Collinsella<br>unknown_29<br>3 |  |
| MGYG-HGUT-<br>03024:s__Collinsell<br>a unknown_294 | 0.2<br>15<br>98<br>84<br>68 | 0.3<br>41<br>06<br>52<br>09                  | 0.8<br>91<br>82<br>55<br>59 | d_<br>_B<br>act<br>eri<br>a | p__A<br>ctino<br>bacte<br>riota | c__Co<br>riobac<br>teriia | o__Cor<br>iobact<br>eriales | f__Cori<br>obacteri<br>aceae | g__Collins<br>ella | s__Collinsella<br>unknown_29<br>4 |  |
| MGYG-HGUT-<br>03026:s__Collinsell<br>a unknown_296 | 0.0<br>56<br>96<br>89<br>46 | 0.5<br>24<br>02<br>09<br>71                  | 0.8<br>57<br>21<br>13<br>2  | d_<br>_B<br>act<br>eri<br>a | p__A<br>ctino<br>bacte<br>riota | c__Co<br>riobac<br>teriia | o__Cor<br>iobact<br>eriales | f__Cori<br>obacteri<br>aceae | g__Collins<br>ella | s__Collinsella<br>unknown_29<br>6 |  |
| MGYG-HGUT-<br>03027:s__Collinsell<br>a unknown_297 | 0.0<br>35<br>44<br>65<br>18 | 0.5<br>80<br>96<br>59<br>33                  | 0.7<br>68<br>22<br>58<br>34 | d_<br>_B<br>act<br>eri<br>a | p__A<br>ctino<br>bacte<br>riota | c__Co<br>riobac<br>teriia | o__Cor<br>iobact<br>eriales | f__Cori<br>obacteri<br>aceae | g__Collins<br>ella | s__Collinsella<br>unknown_29<br>7 |  |
| MGYG-HGUT-<br>03028:s__Collinsell<br>a unknown_298 | 0.7<br>46<br>53<br>46<br>37 | 0.0<br>87<br>38<br>31<br>29                  | 0.9<br>79<br>45<br>84<br>75 | d_<br>_B<br>act<br>eri<br>a | p__A<br>ctino<br>bacte<br>riota | c__Co<br>riobac<br>teriia | o__Cor<br>iobact<br>eriales | f__Cori<br>obacteri<br>aceae | g__Collins<br>ella | s__Collinsella<br>unknown_29<br>8 |  |
| MGYG-HGUT-<br>03030:s__Collinsell<br>a unknown_300 | 0.9<br>19<br>10<br>13<br>21 | -<br>0.0<br>27<br>92<br>23<br>7              | 0.9<br>94<br>47<br>94<br>74 | d_<br>_B<br>act<br>eri<br>a | p__A<br>ctino<br>bacte<br>riota | c__Co<br>riobac<br>teriia | o__Cor<br>iobact<br>eriales | f__Cori<br>obacteri<br>aceae | g__Collins<br>ella | s__Collinsella<br>unknown_30<br>0 |  |
| MGYG-HGUT-<br>03032:s__Collinsell<br>a unknown_302 | 0.1<br>81<br>92<br>57<br>47 | 0.3<br>69<br>52<br>65<br>37                  | 0.8<br>91<br>82<br>55<br>59 | d_<br>_B<br>act<br>eri<br>a | p__A<br>ctino<br>bacte<br>riota | c__Co<br>riobac<br>teriia | o__Cor<br>iobact<br>eriales | f__Cori<br>obacteri<br>aceae | g__Collins<br>ella | s__Collinsella<br>unknown_30<br>2 |  |
| MGYG-HGUT-<br>03034:s__Collinsell<br>a unknown_304 | 0.0<br>77<br>57             | 0.4<br>67<br>11                              | 0.8<br>77<br>82             | d_<br>_B<br>act             | p__A<br>ctino                   | c__Co<br>riobac<br>teriia | o__Cor<br>iobact<br>eriales | f__Cori<br>obacteri<br>aceae | g__Collins<br>ella | s__Collinsella<br>unknown_30<br>4 |  |

|                                                 |                             |                                  |                             |                             |                                 |                           |                             |                              |                    |                                        |
|-------------------------------------------------|-----------------------------|----------------------------------|-----------------------------|-----------------------------|---------------------------------|---------------------------|-----------------------------|------------------------------|--------------------|----------------------------------------|
|                                                 | 63<br>9                     | 80<br>39                         | 62<br>47                    | eri<br>a                    | bacte<br>riota                  |                           |                             |                              |                    |                                        |
| MGYG-HGUT-03036:s__Collinsella unknown_305      | 0.8<br>23<br>04<br>59<br>89 | 0.0<br>62<br>08<br>75<br>86      | 0.9<br>91<br>13<br>66<br>22 | d_<br>_B<br>act<br>eri<br>a | p__A<br>ctino<br>bacte<br>riota | c__Co<br>riobac<br>teriia | o__Cor<br>iobact<br>eriales | f__Cori<br>obacteri<br>aceae | g__Collins<br>ella | s__Collinsella<br>unknown_30<br>5      |
| MGYG-HGUT-03038:s__Collinsella unknown_307      | 0.6<br>80<br>67<br>45       | 0.1<br>14<br>95<br>76<br>16      | 0.9<br>75<br>67<br>17<br>57 | d_<br>_B<br>act<br>eri<br>a | p__A<br>ctino<br>bacte<br>riota | c__Co<br>riobac<br>teriia | o__Cor<br>iobact<br>eriales | f__Cori<br>obacteri<br>aceae | g__Collins<br>ella | s__Collinsella<br>unknown_30<br>7      |
| MGYG-HGUT-03039:s__Collinsella aerofaciens_F_16 | 0.0<br>69<br>21<br>56<br>2  | 0.4<br>87<br>23<br>63<br>1       | 0.8<br>77<br>82<br>62<br>47 | d_<br>_B<br>act<br>eri<br>a | p__A<br>ctino<br>bacte<br>riota | c__Co<br>riobac<br>teriia | o__Cor<br>iobact<br>eriales | f__Cori<br>obacteri<br>aceae | g__Collins<br>ella | s__Collinsella<br>aerofaciens_F<br>_16 |
| MGYG-HGUT-03042:s__Gemmiger unknown_11          | 0.6<br>01<br>27<br>89<br>03 | -<br>0.1<br>44<br>80<br>92<br>26 | 0.9<br>75<br>67<br>17<br>57 | d_<br>_B<br>act<br>eri<br>a | p__Fi<br>rmicu<br>tes_A         | c__Clo<br>stridia         | o__Os<br>cillospi<br>rales  | f__Rumi<br>nococca<br>ceae   | g__Gemmi<br>ger    | s__Gemmiger<br>unknown_11              |
| MGYG-HGUT-03044:s__Collinsella unknown_311      | 0.0<br>25<br>67<br>90<br>98 | 0.6<br>00<br>28<br>75<br>91      | 0.7<br>68<br>22<br>58<br>34 | d_<br>_B<br>act<br>eri<br>a | p__A<br>ctino<br>bacte<br>riota | c__Co<br>riobac<br>teriia | o__Cor<br>iobact<br>eriales | f__Cori<br>obacteri<br>aceae | g__Collins<br>ella | s__Collinsella<br>unknown_31<br>1      |
| MGYG-HGUT-03045:s__Collinsella unknown_312      | 0.2<br>43<br>59<br>72<br>78 | 0.3<br>14<br>69<br>63<br>54      | 0.9<br>02<br>18<br>13<br>67 | d_<br>_B<br>act<br>eri<br>a | p__A<br>ctino<br>bacte<br>riota | c__Co<br>riobac<br>teriia | o__Cor<br>iobact<br>eriales | f__Cori<br>obacteri<br>aceae | g__Collins<br>ella | s__Collinsella<br>unknown_31<br>2      |
| MGYG-HGUT-03046:s__Collinsella unknown_313      | 0.5<br>64<br>63<br>65<br>3  | 0.1<br>56<br>84<br>94<br>31      | 0.9<br>71<br>33<br>90<br>3  | d_<br>_B<br>act<br>eri<br>a | p__A<br>ctino<br>bacte<br>riota | c__Co<br>riobac<br>teriia | o__Cor<br>iobact<br>eriales | f__Cori<br>obacteri<br>aceae | g__Collins<br>ella | s__Collinsella<br>unknown_31<br>3      |
| MGYG-HGUT-03047:s__Collinsella unknown_314      | 0.2<br>09<br>70<br>17<br>12 | 0.3<br>41<br>64<br>52<br>39      | 0.8<br>91<br>82<br>55<br>59 | d_<br>_B<br>act<br>eri<br>a | p__A<br>ctino<br>bacte<br>riota | c__Co<br>riobac<br>teriia | o__Cor<br>iobact<br>eriales | f__Cori<br>obacteri<br>aceae | g__Collins<br>ella | s__Collinsella<br>unknown_31<br>4      |
| MGYG-HGUT-03052:s__Collinsella unknown_318      | 0.1<br>30<br>45<br>35<br>63 | 0.3<br>89<br>04<br>79<br>99      | 0.8<br>91<br>82<br>55<br>59 | d_<br>_B<br>act<br>eri<br>a | p__A<br>ctino<br>bacte<br>riota | c__Co<br>riobac<br>teriia | o__Cor<br>iobact<br>eriales | f__Cori<br>obacteri<br>aceae | g__Collins<br>ella | s__Collinsella<br>unknown_31<br>8      |

|                                                          |                             |                                  |                             |                             |                                 |                           |                             |                               |                                       |                                                    |
|----------------------------------------------------------|-----------------------------|----------------------------------|-----------------------------|-----------------------------|---------------------------------|---------------------------|-----------------------------|-------------------------------|---------------------------------------|----------------------------------------------------|
| MGYG-HGUT-03053:s__Collinsella unknown_319               | 0.1<br>10<br>76<br>07<br>36 | 0.4<br>29<br>90<br>02<br>43      | 0.8<br>83<br>30<br>72<br>56 | d_<br>_B<br>act<br>eri<br>a | p__A<br>ctino<br>bacte<br>riota | c__Co<br>riobac<br>teriia | o__Cor<br>iobact<br>eriales | f__Cori<br>obacteri<br>aceae  | g__Collins<br>ella                    | s__Collinsella<br>unknown_31<br>9                  |
| MGYG-HGUT-03054:s__Eubacterium_R unknown_15              | 0.2<br>24<br>31<br>13<br>9  | 0.3<br>33<br>51<br>54<br>52      | 0.8<br>91<br>82<br>55<br>59 | d_<br>_B<br>act<br>eri<br>a | p__Fi<br>rmicu<br>tes_A         | c__Clo<br>stridia         | o__Os<br>cillospi<br>rales  | f__Acut<br>alibacte<br>raceae | g__Eubact<br>erium_R                  | s__Eubacteriu<br>m_R<br>unknown_15                 |
| MGYG-HGUT-03055:s__Acutalibacteraceae unknown unknown_37 | 0.3<br>62<br>42<br>19<br>05 | -<br>0.2<br>47<br>66<br>94<br>45 | 0.9<br>39<br>70<br>92<br>5  | d_<br>_B<br>act<br>eri<br>a | p__Fi<br>rmicu<br>tes_A         | c__Clo<br>stridia         | o__Os<br>cillospi<br>rales  | f__Acut<br>alibacte<br>raceae | g__Acutali<br>bacteracea<br>e unknown | s__Acutalibac<br>teraceae<br>unknown<br>unknown_37 |
| MGYG-HGUT-03057:s__CAG-110 unknown_22                    | 0.0<br>10<br>63<br>95<br>98 | 0.6<br>91<br>94<br>30<br>94      | 0.7<br>68<br>22<br>58<br>34 | d_<br>_B<br>act<br>eri<br>a | p__Fi<br>rmicu<br>tes_A         | c__Clo<br>stridia         | o__Os<br>cillospi<br>rales  | f__Oscil<br>lospirac<br>eae   | g__CAG-<br>110                        | s__CAG-110<br>unknown_22                           |
| MGYG-HGUT-03062:s__Collinsella unknown_321               | 0.6<br>92<br>82<br>03<br>8  | 0.1<br>06<br>27<br>83<br>05      | 0.9<br>77<br>93<br>84<br>04 | d_<br>_B<br>act<br>eri<br>a | p__A<br>ctino<br>bacte<br>riota | c__Co<br>riobac<br>teriia | o__Cor<br>iobact<br>eriales | f__Cori<br>obacteri<br>aceae  | g__Collins<br>ella                    | s__Collinsella<br>unknown_32<br>1                  |
| MGYG-HGUT-03065:s__Faecalicatena unknown_9               | 0.3<br>17<br>56<br>59<br>19 | -<br>0.2<br>77<br>00<br>67<br>51 | 0.9<br>29<br>02<br>59<br>13 | d_<br>_B<br>act<br>eri<br>a | p__Fi<br>rmicu<br>tes_A         | c__Clo<br>stridia         | o__Lac<br>hnospi<br>rales   | f__Lach<br>nospirac<br>eae    | g__Faecali<br>catena                  | s__Faecalicat<br>ena<br>unknown_9                  |
| MGYG-HGUT-03066:s__Collinsella unknown_322               | 0.0<br>05<br>49<br>71<br>86 | 0.7<br>50<br>15<br>49<br>72      | 0.7<br>50<br>05<br>64<br>24 | d_<br>_B<br>act<br>eri<br>a | p__A<br>ctino<br>bacte<br>riota | c__Co<br>riobac<br>teriia | o__Cor<br>iobact<br>eriales | f__Cori<br>obacteri<br>aceae  | g__Collins<br>ella                    | s__Collinsella<br>unknown_32<br>2                  |
| MGYG-HGUT-03067:s__Collinsella unknown_323               | 0.3<br>09<br>20<br>13<br>09 | -<br>0.2<br>81<br>20<br>79<br>05 | 0.9<br>29<br>02<br>59<br>13 | d_<br>_B<br>act<br>eri<br>a | p__A<br>ctino<br>bacte<br>riota | c__Co<br>riobac<br>teriia | o__Cor<br>iobact<br>eriales | f__Cori<br>obacteri<br>aceae  | g__Collins<br>ella                    | s__Collinsella<br>unknown_32<br>3                  |
| MGYG-HGUT-03069:s__Bifidobacterium gallinarum            | 0.4<br>54<br>84<br>24<br>76 | 0.2<br>08<br>04<br>17<br>17      | 0.9<br>65<br>32<br>48<br>27 | d_<br>_B<br>act<br>eri<br>a | p__A<br>ctino<br>bacte<br>riota | c__Ac<br>tinoba<br>cteria | o__Act<br>inomyc<br>etales  | f__Bifid<br>obacteri<br>aceae | g__Bifidob<br>acterium                | s__Bifidobact<br>erium<br>gallinarum               |

|                                              |             |              |             |             |                   |                   |                     |                      |                  |                              |
|----------------------------------------------|-------------|--------------|-------------|-------------|-------------------|-------------------|---------------------|----------------------|------------------|------------------------------|
| MGYG-HGUT-03071:s__Veillonella unknown_12    | 0.74972646  | -0.089662073 | 0.979458475 | d__Bacteria | p__Firmicutes     | c__Negativicutes  | o__Veillonellales   | f__Veillonellaceae   | g__Veillonella   | s__Veillonella unknown_12    |
| MGYG-HGUT-03074:s__Clostridium_Q sp000435655 | 0.098982946 | 0.441782067  | 0.883307256 | d__Bacteria | p__Firmicutes     | c__Clostridia     | o__Lachnospirales   | f__Lachnospiraceae   | g__Clostridium_Q | s__Clostridium_Q sp000435655 |
| MGYG-HGUT-03075:s__Collinsella unknown_324   | 0.312458488 | 0.277647459  | 0.929025913 | d__Bacteria | p__Actinobacteria | c__Coriobacteriia | o__Coriobacteriales | f__Coriobacteriaceae | g__Collinsella   | s__Collinsella unknown_324   |
| MGYG-HGUT-03076:s__Odoribacter unknown_4     | 0.629987072 | -0.134857692 | 0.975671757 | d__Bacteria | p__Bacteroidota   | c__Bacteroidia    | o__Bacteroidales    | f__Marinifilaceae    | g__Odoribacter   | s__Odoribacter unknown_4     |
| MGYG-HGUT-03078:s__Collinsella unknown_325   | 0.062021844 | 0.518810794  | 0.85721132  | d__Bacteria | p__Actinobacteria | c__Coriobacteriia | o__Coriobacteriales | f__Coriobacteriaceae | g__Collinsella   | s__Collinsella unknown_325   |
| MGYG-HGUT-03079:s__Collinsella unknown_326   | 0.037664267 | 0.562748647  | 0.768225834 | d__Bacteria | p__Actinobacteria | c__Coriobacteriia | o__Coriobacteriales | f__Coriobacteriaceae | g__Collinsella   | s__Collinsella unknown_326   |
| MGYG-HGUT-03080:s__Collinsella unknown_327   | 0.214848719 | 0.34641781   | 0.891825559 | d__Bacteria | p__Actinobacteria | c__Coriobacteriia | o__Coriobacteriales | f__Coriobacteriaceae | g__Collinsella   | s__Collinsella unknown_327   |
| MGYG-HGUT-03082:s__Collinsella unknown_329   | 0.113677632 | 0.433624535  | 0.883307256 | d__Bacteria | p__Actinobacteria | c__Coriobacteriia | o__Coriobacteriales | f__Coriobacteriaceae | g__Collinsella   | s__Collinsella unknown_329   |
| MGYG-HGUT-03084:s__CAG-724 unknown_2         | 0.964418041 | 0.012502111  | 0.947479474 | d__Bacteria | p__Firmicutes     | c__Clostridia     | o__Oscillospirales  | f__CAG-272           | g__CAG-724       | s__CAG-724 unknown_2         |



|                                               |                                  |                                  |                               |                  |                     |                   |                     |                      |                    |                               |
|-----------------------------------------------|----------------------------------|----------------------------------|-------------------------------|------------------|---------------------|-------------------|---------------------|----------------------|--------------------|-------------------------------|
| MGYG-HGUT-03091:s__Parabacteroides unknown_12 | 0.577<br>0.198<br>0.149<br>0.117 | 0.152<br>0.199<br>0.135<br>0.161 | 0.975<br>0.67<br>0.17<br>0.57 | d__Bacteroidetes | p__Bacteroidota     | c__Bacteroidia    | o__Bacteroidales    | f__Tannerellaceae    | g__Parabacteroides | s__Parabacteroides unknown_12 |
| MGYG-HGUT-03094:s__Bacteroides_A barnesiae    | 0.655<br>0.199<br>0.353<br>0.31  | -0.124<br>0.81<br>0.58<br>0.31   | 0.975<br>0.67<br>0.17<br>0.57 | d__Bacteroidetes | p__Bacteroidota     | c__Bacteroidia    | o__Bacteroidales    | f__Bacteroidaceae    | g__Bacteroides_A   | s__Bacteroides_A barnesiae    |
| MGYG-HGUT-03095:s__CAG-460 unknown_3          | 0.483<br>0.63<br>0.38<br>0.09    | -0.194<br>0.37<br>0.94<br>0.45   | 0.968<br>0.53<br>0.20<br>0.73 | d__Bacteroidetes | p__Firmicutes       | c__Bactericilli   | o__RF39             | f__CAG-1000          | g__CAG-460         | s__CAG-460 unknown_3          |
| MGYG-HGUT-03096:s__Collinsella unknown_332    | 0.016<br>0.92<br>0.00<br>0.88    | 0.652<br>0.24<br>0.17<br>0.04    | 0.768<br>0.22<br>0.58<br>0.34 | d__Bacteroidetes | p__Actinobacteriota | c__Coriobacteriia | o__Coriobacteriales | f__Coriobacteriaceae | g__Collinsella     | s__Collinsella unknown_332    |
| MGYG-HGUT-03097:s__Bacteroides_A sp000436795  | 0.878<br>0.85<br>0.85<br>0.38    | 0.042<br>0.71<br>0.71<br>0.46    | 0.994<br>0.47<br>0.94<br>0.74 | d__Bacteroidetes | p__Bacteroidota     | c__Bacteroidia    | o__Bacteroidales    | f__Bacteroidaceae    | g__Bacteroides_A   | s__Bacteroides_A sp000436795  |
| MGYG-HGUT-03101:s__Collinsella unknown_333    | 0.485<br>0.81<br>0.83<br>0.77    | 0.192<br>0.94<br>0.04<br>0.82    | 0.968<br>0.53<br>0.20<br>0.73 | d__Bacteroidetes | p__Actinobacteriota | c__Coriobacteriia | o__Coriobacteriales | f__Coriobacteriaceae | g__Collinsella     | s__Collinsella unknown_333    |
| MGYG-HGUT-03103:s__Collinsella unknown_334    | 0.187<br>0.36<br>0.00<br>0.67    | -0.361<br>0.57<br>0.26<br>0.76   | 0.891<br>0.82<br>0.55<br>0.59 | d__Bacteroidetes | p__Actinobacteriota | c__Coriobacteriia | o__Coriobacteriales | f__Coriobacteriaceae | g__Collinsella     | s__Collinsella unknown_334    |
| MGYG-HGUT-03105:s__QAMX01 unknown unknown     | 0.836<br>0.00<br>0.03<br>0.54    | 0.056<br>0.80<br>0.88<br>0.21    | 0.992<br>0.77<br>0.57<br>0.75 | d__Bacteroidetes | p__Firmicutes_A     | c__Clostridia     | o__Oscillospirales  | f__QAMX01            | g__QAMX01 unknown  | s__QAMX01 unknown unknown     |
| MGYG-HGUT-03107:s__Collinsella unknown_335    | 0.655<br>0.84<br>0.68            | 0.121<br>0.93<br>0.88<br>0.19    | 0.975<br>0.67<br>0.17<br>0.57 | d__Bacteroidetes | p__Actinobacteriota | c__Coriobacteriia | o__Coriobacteriales | f__Coriobacteriaceae | g__Collinsella     | s__Collinsella unknown_335    |

|                                                     |                             |                                  |                             |                             |                                 |                           |                             |                               |                       |                                                |
|-----------------------------------------------------|-----------------------------|----------------------------------|-----------------------------|-----------------------------|---------------------------------|---------------------------|-----------------------------|-------------------------------|-----------------------|------------------------------------------------|
| MGYG-HGUT-03108:s__Collinsella unknown_336          | 0.6<br>87<br>45<br>18<br>46 | -<br>0.1<br>11<br>37<br>32<br>02 | 0.9<br>75<br>76<br>85<br>79 | d_<br>_B<br>act<br>eri<br>a | p__A<br>ctino<br>bacte<br>riota | c__Co<br>riobac<br>teria  | o__Cor<br>iobact<br>eriales | f__Cori<br>obacteri<br>aceae  | g__Collins<br>ella    | s__Collinsella<br>unknown_336                  |
| MGYG-HGUT-03112:s__Ruminococcus_E unknown_4         | 0.8<br>93<br>35<br>15<br>2  | 0.0<br>37<br>46<br>58<br>48      | 0.9<br>94<br>47<br>94<br>74 | d_<br>_B<br>act<br>eri<br>a | p__Fi<br>rmicu<br>tes_A         | c__Clo<br>stridia         | o__Os<br>cillospi<br>rales  | f__Acut<br>alibacte<br>raceae | g__Rumin<br>ococcus_E | s__Ruminoco<br>ccus_E<br>unknown_4             |
| MGYG-HGUT-03113:s__Pauljensenia sp001838165         | 0.0<br>24<br>44<br>60<br>03 | 0.6<br>16<br>53<br>60<br>75      | 0.7<br>68<br>22<br>58<br>34 | d_<br>_B<br>act<br>eri<br>a | p__A<br>ctino<br>bacte<br>riota | c__Ac<br>tinoba<br>cteria | o__Act<br>inomyc<br>etales  | f__Actin<br>omycet<br>aceae   | g__Pauljen<br>senia   | s__Pauljense<br>nia<br>sp001838165             |
| MGYG-HGUT-03114:s__Clostridium unknown_6            | 0.2<br>23<br>61<br>48<br>44 | -<br>0.3<br>38<br>36<br>12<br>98 | 0.8<br>91<br>82<br>55<br>59 | d_<br>_B<br>act<br>eri<br>a | p__Fi<br>rmicu<br>tes_A         | c__Clo<br>stridia         | o__Clo<br>stridial<br>es    | f__Clost<br>ridiaceae         | g__Clostri<br>dium    | s__Clostridiu<br>m<br>unknown_6                |
| MGYG-HGUT-03134:s__Streptococcus unknown_16         | 0.3<br>46<br>67<br>47<br>2  | 0.2<br>62<br>53<br>52<br>06      | 0.9<br>39<br>70<br>92<br>5  | d_<br>_B<br>act<br>eri<br>a | p__Fi<br>rmicu<br>tes           | c__Ba<br>cilli            | o__Lac<br>tobacill<br>ales  | f__Stre<br>ptococc<br>aceae   | g__Strepto<br>coccus  | s__Streptococ<br>cus<br>unknown_16             |
| MGYG-HGUT-03136:s__Streptococcus unknown_17         | 0.4<br>09<br>79<br>77<br>32 | -<br>0.2<br>31<br>14<br>07<br>7  | 0.9<br>39<br>70<br>92<br>5  | d_<br>_B<br>act<br>eri<br>a | p__Fi<br>rmicu<br>tes           | c__Ba<br>cilli            | o__Lac<br>tobacill<br>ales  | f__Stre<br>ptococc<br>aceae   | g__Strepto<br>coccus  | s__Streptococ<br>cus<br>unknown_17             |
| MGYG-HGUT-03138:s__Streptococcus pseudopneumoniae_O | 0.2<br>48<br>01<br>61<br>68 | 0.3<br>22<br>69<br>12<br>06      | 0.9<br>02<br>18<br>13<br>67 | d_<br>_B<br>act<br>eri<br>a | p__Fi<br>rmicu<br>tes           | c__Ba<br>cilli            | o__Lac<br>tobacill<br>ales  | f__Stre<br>ptococc<br>aceae   | g__Strepto<br>coccus  | s__Streptococ<br>cus<br>pseudopneu<br>moniae_O |
| MGYG-HGUT-03146:s__Streptococcus oralis_S           | 0.3<br>73<br>16<br>91<br>19 | 0.2<br>49<br>55<br>43<br>14      | 0.9<br>39<br>70<br>92<br>5  | d_<br>_B<br>act<br>eri<br>a | p__Fi<br>rmicu<br>tes           | c__Ba<br>cilli            | o__Lac<br>tobacill<br>ales  | f__Stre<br>ptococc<br>aceae   | g__Strepto<br>coccus  | s__Streptococ<br>cus oralis_S                  |
| MGYG-HGUT-03151:s__Blautia_A unknown_18             | 0.2<br>20<br>99<br>88<br>9  | 0.3<br>41<br>98<br>92<br>5       | 0.8<br>91<br>82<br>55<br>59 | d_<br>_B<br>act<br>eri<br>a | p__Fi<br>rmicu<br>tes_A         | c__Clo<br>stridia         | o__Lac<br>hnospi<br>rales   | f__Lach<br>nospira<br>ceae    | g__Blautia<br>_A      | s__Blautia_A<br>unknown_18                     |

|                                                          |                             |                                   |                             |                             |                                 |                                        |                             |                               |                                       |                                                    |
|----------------------------------------------------------|-----------------------------|-----------------------------------|-----------------------------|-----------------------------|---------------------------------|----------------------------------------|-----------------------------|-------------------------------|---------------------------------------|----------------------------------------------------|
| MGYG-HGUT-03152:s__Prevotella denticola                  | 0.2<br>18<br>68<br>41<br>49 | -<br>0.3<br>41<br>73<br>42<br>66  | 0.8<br>91<br>82<br>55<br>59 | d_<br>_B<br>act<br>eri<br>a | p__B<br>acter<br>oidot<br>a     | c__Ba<br>cteroi<br>dia                 | o__Bac<br>teroida<br>les    | f__Bact<br>eroidac<br>eae     | g__Prevot<br>ella                     | s__Prevotella<br>denticola                         |
| MGYG-HGUT-03153:s__RUG420 unknown_1                      | 0.7<br>29<br>23<br>27<br>25 | 0.0<br>94<br>32<br>26<br>52       | 0.9<br>79<br>45<br>84<br>75 | d_<br>_B<br>act<br>eri<br>a | p__Fi<br>rmicu<br>tes_A         | c__Clo<br>stridia                      | o__Os<br>cillospi<br>rales  | f__Acut<br>alibacte<br>raceae | g__RUG42<br>0                         | s__RUG420<br>unknown_1                             |
| MGYG-HGUT-03160:s__Acutalibacteraceae unknown unknown_38 | 0.2<br>12<br>61<br>59<br>17 | 0.3<br>47<br>04<br>19<br>54       | 0.8<br>91<br>82<br>55<br>59 | d_<br>_B<br>act<br>eri<br>a | p__Fi<br>rmicu<br>tes_A         | c__Clo<br>stridia                      | o__Os<br>cillospi<br>rales  | f__Acut<br>alibacte<br>raceae | g__Acutali<br>bacteracea<br>e unknown | s__Acutalibac<br>teraceae<br>unknown<br>unknown_38 |
| MGYG-HGUT-03163:s__Bacteroides_A unknown_13              | 0.8<br>85<br>19<br>13<br>82 | 0.0<br>40<br>57<br>47<br>23<br>41 | 0.9<br>94<br>47<br>94<br>74 | d_<br>_B<br>act<br>eri<br>a | p__B<br>acter<br>oidot<br>a     | c__Ba<br>cteroi<br>dia                 | o__Bac<br>teroida<br>les    | f__Bact<br>eroidac<br>eae     | g__Bacter<br>oides_A                  | s__Bacteroides<br>_A<br>unknown_13                 |
| MGYG-HGUT-03165:s__Coproccoccus unknown_3                | 0.9<br>12<br>34<br>35<br>52 | -<br>0.0<br>29<br>89<br>64<br>19  | 0.9<br>94<br>47<br>94<br>74 | d_<br>_B<br>act<br>eri<br>a | p__Fi<br>rmicu<br>tes_A         | c__Clo<br>stridia                      | o__Lac<br>hnospira<br>les   | f__Lach<br>nospirac<br>eae    | g__Coprocc<br>occus                   | s__Coproccoc<br>cus<br>unknown_3                   |
| MGYG-HGUT-03166:s__Faecalibacterium unknown_11           | 0.9<br>95<br>87<br>14<br>73 | -<br>0.0<br>01<br>44<br>14<br>77  | 0.9<br>98<br>80<br>33<br>46 | d_<br>_B<br>act<br>eri<br>a | p__Fi<br>rmicu<br>tes_A         | c__Clo<br>stridia                      | o__Os<br>cillospi<br>rales  | f__Rumi<br>nococca<br>ceae    | g__Faecali<br>bacterium               | s__Faecalibac<br>terium<br>unknown_11              |
| MGYG-HGUT-03167:s__Collinsella unknown_341               | 0.8<br>28<br>66<br>81<br>76 | 0.0<br>60<br>31<br>72<br>01       | 0.9<br>92<br>22<br>01<br>9  | d_<br>_B<br>act<br>eri<br>a | p__A<br>ctino<br>bacte<br>riota | c__Co<br>riobac<br>teriia              | o__Cor<br>iobact<br>eriales | f__Cori<br>obacteri<br>aceae  | g__Collins<br>ella                    | s__Collinsella<br>unknown_34<br>1                  |
| MGYG-HGUT-03173:s__Collinsella aerofaciens_F_17          | 0.6<br>70<br>22<br>69<br>6  | 0.1<br>16<br>41<br>50<br>61       | 0.9<br>75<br>67<br>17<br>57 | d_<br>_B<br>act<br>eri<br>a | p__A<br>ctino<br>bacte<br>riota | c__Co<br>riobac<br>teriia              | o__Cor<br>iobact<br>eriales | f__Cori<br>obacteri<br>aceae  | g__Collins<br>ella                    | s__Collinsella<br>aerofaciens_F<br>_17             |
| MGYG-HGUT-03178:s__Klebsiella quasivariicola             | 0.2<br>04<br>43<br>55<br>58 | 0.3<br>27<br>95<br>68<br>76       | 0.8<br>91<br>82<br>55<br>59 | d_<br>_B<br>act<br>eri<br>a | p__Pr<br>oteob<br>acteri<br>a   | c__Ga<br>mmap<br>roteo<br>bacter<br>ia | o__Ent<br>erobac<br>terales | f__Ente<br>robacte<br>riaceae | g__Klebsie<br>lla                     | s__Klebsiella<br>quasivariicola                    |

|                                                  |                             |                                  |                             |                             |                                 |                           |                                     |                               |                                       |                                                    |
|--------------------------------------------------|-----------------------------|----------------------------------|-----------------------------|-----------------------------|---------------------------------|---------------------------|-------------------------------------|-------------------------------|---------------------------------------|----------------------------------------------------|
| MGYG-HGUT-03181:s__Collinsella unknown_346       | 0.1<br>66<br>47<br>50<br>12 | 0.3<br>84<br>78<br>75<br>89      | 0.8<br>91<br>82<br>55<br>59 | d_<br>_B<br>act<br>eri<br>a | p__A<br>ctino<br>bacte<br>riota | c__Co<br>riobac<br>teriia | o__Cor<br>iobact<br>eriales         | f__Cori<br>obacteri<br>aceae  | g__Collins<br>ella                    | s__Collinsella<br>unknown_34<br>6                  |
| MGYG-HGUT-03183:s__Collinsella unknown_347       | 0.3<br>68<br>34<br>86<br>91 | 0.2<br>49<br>11<br>93<br>75      | 0.9<br>39<br>70<br>92<br>5  | d_<br>_B<br>act<br>eri<br>a | p__A<br>ctino<br>bacte<br>riota | c__Co<br>riobac<br>teriia | o__Cor<br>iobact<br>eriales         | f__Cori<br>obacteri<br>aceae  | g__Collins<br>ella                    | s__Collinsella<br>unknown_34<br>7                  |
| MGYG-HGUT-03188:s__Veillonella dispar_2          | 0.8<br>87<br>81<br>45<br>64 | 0.0<br>38<br>82<br>56<br>56      | 0.9<br>94<br>47<br>94<br>74 | d_<br>_B<br>act<br>eri<br>a | p__Fi<br>rmicu<br>tes_C         | c__Ne<br>gativic<br>utes  | o__Vei<br>llonella<br>les           | f__Veill<br>onellace<br>ae    | g__Veillon<br>ella                    | s__Veillonella<br>dispar_2                         |
| MGYG-HGUT-03190:s__Veillonella rogosae           | 0.8<br>66<br>95<br>16<br>53 | 0.0<br>46<br>97<br>42<br>71      | 0.9<br>94<br>47<br>94<br>74 | d_<br>_B<br>act<br>eri<br>a | p__Fi<br>rmicu<br>tes_C         | c__Ne<br>gativic<br>utes  | o__Vei<br>llonella<br>les           | f__Veill<br>onellace<br>ae    | g__Veillon<br>ella                    | s__Veillonella<br>rogosae                          |
| MGYG-HGUT-03192:s__UBA5416 unknown               | 0.1<br>53<br>96<br>13<br>01 | 0.3<br>91<br>76<br>01<br>47      | 0.8<br>91<br>82<br>55<br>59 | d_<br>_B<br>act<br>eri<br>a | p__Fi<br>rmicu<br>tes_A         | c__Clo<br>stridia         | o__Lac<br>hnospi<br>rales           | f__Lach<br>nospirac<br>eae    | g__UBA54<br>16                        | s__UBA5416<br>unknown                              |
| MGYG-HGUT-03197:s__F0422 unknown_3               | 0.9<br>75<br>46<br>62<br>54 | -<br>0.0<br>08<br>53<br>67<br>18 | 0.9<br>96<br>58<br>78<br>01 | d_<br>_B<br>act<br>eri<br>a | p__Fi<br>rmicu<br>tes_C         | c__Ne<br>gativic<br>utes  | o__Vei<br>llonella<br>les           | f__Veill<br>onellace<br>ae    | g__F0422                              | s__F0422<br>unknown_3                              |
| MGYG-HGUT-03206:s__Collinsella unknown_349       | 0.4<br>62<br>68<br>16       | 0.2<br>00<br>43<br>94<br>05      | 0.9<br>65<br>57<br>46<br>92 | d_<br>_B<br>act<br>eri<br>a | p__A<br>ctino<br>bacte<br>riota | c__Co<br>riobac<br>teriia | o__Cor<br>iobact<br>eriales         | f__Cori<br>obacteri<br>aceae  | g__Collins<br>ella                    | s__Collinsella<br>unknown_34<br>9                  |
| MGYG-HGUT-03210:s__Anaerovoracaceae unknown_6    | 0.8<br>23<br>89<br>38<br>59 | -<br>0.0<br>61<br>13<br>27<br>86 | 0.9<br>91<br>14<br>89<br>31 | d_<br>_B<br>act<br>eri<br>a | p__Fi<br>rmicu<br>tes_A         | c__Clo<br>stridia         | o__Pe<br>ptostre<br>ptococ<br>cales | f__Anaer<br>ovorac<br>aceae   | g__Anaero<br>voracacea<br>e unknown   | s__Anaerovor<br>acaceae<br>unknown<br>unknown_6    |
| MGYG-HGUT-03211:s__Acutalibacteraceae unknown_40 | 0.6<br>75<br>81<br>94<br>25 | 0.1<br>15<br>57<br>50<br>41      | 0.9<br>75<br>67<br>17<br>57 | d_<br>_B<br>act<br>eri<br>a | p__Fi<br>rmicu<br>tes_A         | c__Clo<br>stridia         | o__Os<br>cillospi<br>rales          | f__Acut<br>alibacte<br>raceae | g__Acutali<br>bacteracea<br>e unknown | s__Acutalibac<br>teraceae<br>unknown<br>unknown_40 |

|                                                          |             |                |             |             |                     |                   |                       |                           |                                   |                                          |
|----------------------------------------------------------|-------------|----------------|-------------|-------------|---------------------|-------------------|-----------------------|---------------------------|-----------------------------------|------------------------------------------|
| MGYG-HGUT-03214:s__Lachnospirales unknown unknown_3      | 0.8023246   | 0.068710149    | 0.987142302 | d__Bacteria | p__Firmicutes_A     | c__Clostridia     | o__Lachnospirales     | f__Lachnospirales unknown | g__Lachnospirales unknown unknown | s__Lachnospirales unknown unknown_3      |
| MGYG-HGUT-03215:s__Lachnospiraceae unknown unknown_27    | 0.487015464 | -0.191927797   | 0.968532073 | d__Bacteria | p__Firmicutes_A     | c__Clostridia     | o__Lachnospirales     | f__Lachnospiraceae        | g__Lachnospiraceae unknown        | s__Lachnospiraceae unknown unknown_27    |
| MGYG-HGUT-03221:s__Bacteroidaceae unknown unknown_4      | 0.55409311  | 0.163951538    | 0.968532073 | d__Bacteria | p__Bacteroidota     | c__Bacteroidia    | o__Bacteroidales      | f__Bacteroidaceae         | g__Bacteroidaceae unknown         | s__Bacteroidaceae unknown unknown_4      |
| MGYG-HGUT-03222:s__CAG-582 unknown                       | 0.194865732 | 0.362234107    | 0.891825559 | d__Bacteria | p__Firmicutes       | c__Bacilli        | o__RF39               | f__CAG-1000               | g__CAG-582                        | s__CAG-582 unknown                       |
| MGYG-HGUT-03224:s__CAG-74 unknown unknown_16             | 0.292556616 | 0.287748371    | 0.929025913 | d__Bacteria | p__Firmicutes_A     | c__Clostridia     | o__Christensenellales | f__CAG-74                 | g__CAG-74 unknown                 | s__CAG-74 unknown unknown_16             |
| MGYG-HGUT-03226:s__QALS01 unknown_3                      | 0.81000857  | 0.066701423    | 0.987142302 | d__Bacteria | p__Firmicutes_A     | c__Clostridia     | o__4C28d-15           | f__CAG-727                | g__QALS01                         | s__QALS01 unknown_3                      |
| MGYG-HGUT-03227:s__Christensenellaceae unknown unknown_4 | 0.334044859 | -0.27062878471 | 0.930624692 | d__Bacteria | p__Firmicutes_A     | c__Clostridia     | o__Christensenellales | f__Christensenellaceae    | g__Christensenellaceae unknown    | s__Christensenellaceae unknown unknown_4 |
| MGYG-HGUT-03231:s__Collinsella unknown_355               | 0.622754497 | 0.135489307    | 0.975671757 | d__Bacteria | p__Actinobacteriota | c__Coriobacteriia | o__Coriobacteriales   | f__Coriobacteriaceae      | g__Collinsella                    | s__Collinsella unknown_355               |
| MGYG-HGUT-03232:s__Pseudoflavonifractor unknown          | 0.515453013 | 0.182640628    | 0.968532073 | d__Bacteria | p__Firmicutes_A     | c__Clostridia     | o__Oscillospirales    | f__Oscillospiraceae       | g__Pseudoflavonifractor           | s__Pseudoflavonifractor unknown          |

|                                                   |                             |                                  |                             |                             |                                      |                           |                             |                              |                               |                                          |
|---------------------------------------------------|-----------------------------|----------------------------------|-----------------------------|-----------------------------|--------------------------------------|---------------------------|-----------------------------|------------------------------|-------------------------------|------------------------------------------|
| MGYG-HGUT-03234:s__Collinsella unknown_356        | 0.2<br>02<br>53<br>41<br>26 | 0.3<br>43<br>90<br>13<br>72      | 0.8<br>91<br>82<br>55<br>59 | d_<br>_B<br>act<br>eri<br>a | p__A<br>ctino<br>bacte<br>riota      | c__Co<br>riobac<br>teriia | o__Cor<br>iobact<br>eriales | f__Cori<br>obacteri<br>aceae | g__Collins<br>ella            | s__Collinsella<br>unknown_35<br>6        |
| MGYG-HGUT-03237:s__Victivallis sp002998355        | 0.1<br>54<br>10<br>81<br>6  | 0.3<br>87<br>49<br>25<br>83      | 0.8<br>91<br>82<br>55<br>59 | d_<br>_B<br>act<br>eri<br>a | p__V<br>erruc<br>omicr<br>obiot<br>a | c__Le<br>ntisph<br>aeria  | o__Vic<br>tivallal<br>es    | f__Victi<br>vallacea<br>e    | g__Victival<br>lis            | s__Victivallis<br>sp002998355            |
| MGYG-HGUT-03240:s__Butyrimonas unknown_3          | 0.9<br>22<br>80<br>29<br>84 | 0.0<br>26<br>82<br>26<br>59      | 0.9<br>94<br>47<br>94<br>74 | d_<br>_B<br>act<br>eri<br>a | p__B<br>acter<br>oidot<br>a          | c__Ba<br>cteroi<br>dia    | o__Bac<br>teroida<br>les    | f__Mari<br>nifilacea<br>e    | g__Butyric<br>imonas          | s__Butyricim<br>onas<br>unknown_3        |
| MGYG-HGUT-03242:s__Prevotellamassilia sp000437675 | 0.5<br>73<br>73<br>25<br>62 | -<br>0.1<br>56<br>73<br>06<br>22 | 0.9<br>75<br>67<br>17<br>57 | d_<br>_B<br>act<br>eri<br>a | p__B<br>acter<br>oidot<br>a          | c__Ba<br>cteroi<br>dia    | o__Bac<br>teroida<br>les    | f__Bact<br>eroidac<br>eae    | g__Prevot<br>ellamassili<br>a | s__Prevotella<br>massilia<br>sp000437675 |
| MGYG-HGUT-03245:s__Faecalicatena unknown_10       | 0.3<br>81<br>72<br>50<br>39 | -<br>0.2<br>43<br>64<br>84<br>31 | 0.9<br>39<br>70<br>92<br>5  | d_<br>_B<br>act<br>eri<br>a | p__Fi<br>rmicu<br>tes_A              | c__Clo<br>stridia         | o__Lac<br>hnospi<br>rales   | f__Lach<br>nospirac<br>eae   | g__Faecali<br>catena          | s__Faecalicat<br>ena<br>unknown_10       |
| MGYG-HGUT-03248:s__CAG-727 unknown unknown_19     | 0.6<br>29<br>65<br>45<br>23 | -<br>0.1<br>30<br>14<br>43<br>09 | 0.9<br>75<br>67<br>17<br>57 | d_<br>_B<br>act<br>eri<br>a | p__Fi<br>rmicu<br>tes_A              | c__Clo<br>stridia         | o__4C<br>28d-15             | f__CAG-<br>727               | g__CAG-<br>727<br>unknown     | s__CAG-727<br>unknown<br>unknown_19      |
| MGYG-HGUT-03252:s__Bacteroides unknown_8          | 0.3<br>75<br>54<br>07<br>29 | -<br>0.2<br>42<br>74<br>35<br>36 | 0.9<br>39<br>70<br>92<br>5  | d_<br>_B<br>act<br>eri<br>a | p__B<br>acter<br>oidot<br>a          | c__Ba<br>cteroi<br>dia    | o__Bac<br>teroida<br>les    | f__Bact<br>eroidac<br>eae    | g__Bacter<br>oides            | s__Bacteroides<br>unknown_8              |
| MGYG-HGUT-03263:s__CAG-110 unknown_23             | 0.4<br>26<br>16<br>83<br>33 | -<br>0.2<br>17<br>44<br>68<br>62 | 0.9<br>48<br>39<br>70<br>24 | d_<br>_B<br>act<br>eri<br>a | p__Fi<br>rmicu<br>tes_A              | c__Clo<br>stridia         | o__Os<br>cillospi<br>rales  | f__Oscil<br>lospirac<br>eae  | g__CAG-<br>110                | s__CAG-110<br>unknown_23                 |
| MGYG-HGUT-03266:s__Collinsella unknown_360        | 0.4<br>30<br>16             | 0.2<br>20<br>99                  | 0.9<br>50<br>80             | d_<br>_B<br>act             | p__A<br>ctino                        | c__Co<br>riobac<br>teriia | o__Cor<br>iobact<br>eriales | f__Cori<br>obacteri<br>aceae | g__Collins<br>ella            | s__Collinsella<br>unknown_36<br>0        |

|                                               |                             |                                   |                             |                             |                                    |                              |                                |                                 |                                      |                                                    |
|-----------------------------------------------|-----------------------------|-----------------------------------|-----------------------------|-----------------------------|------------------------------------|------------------------------|--------------------------------|---------------------------------|--------------------------------------|----------------------------------------------------|
|                                               | 04<br>13                    | 90<br>47                          | 65<br>94                    | eri<br>a                    | bacte<br>riota                     |                              |                                |                                 |                                      |                                                    |
| MGYG-HGUT-03268:s__Prevotella unknown_39      | 0.8<br>33<br>45<br>37<br>6  | 0.0<br>56<br>83<br>50<br>59       | 0.9<br>92<br>22<br>01<br>9  | d_<br>_B<br>act<br>eri<br>a | p_<br>B<br>acter<br>oidot<br>a     | c_<br>Ba<br>cteroi<br>dia    | o_<br>Bac<br>teroida<br>les    | f_<br>Bact<br>eroidac<br>eae    | g_<br>Prevot<br>ella                 | s_<br>Prevotella<br>unknown_39                     |
| MGYG-HGUT-03270:s__Muribaculaceae unknown_6   | 0.7<br>49<br>09<br>33       | 0.0<br>88<br>12<br>45<br>16<br>98 | 0.9<br>79<br>45<br>84<br>75 | d_<br>_B<br>act<br>eri<br>a | p_<br>B<br>acter<br>oidot<br>a     | c_<br>Ba<br>cteroi<br>dia    | o_<br>Bac<br>teroida<br>les    | f_<br>Muri<br>baculac<br>eae    | g_<br>Muriba<br>culaceae<br>unknown  | s_<br>Muribacul<br>aceae<br>unknown<br>unknown_6   |
| MGYG-HGUT-03272:s__Collinsella unknown_361    | 0.9<br>53<br>48<br>09<br>74 | -<br>0.0<br>16<br>13<br>67<br>4   | 0.9<br>94<br>47<br>94<br>74 | d_<br>_B<br>act<br>eri<br>a | p_<br>A<br>ctino<br>bacte<br>riota | c_<br>Co<br>riobac<br>teriia | o_<br>Cor<br>iobact<br>eriales | f_<br>Cori<br>obacteri<br>aceae | g_<br>Collins<br>ella                | s_<br>Collinsella<br>unknown_36<br>1               |
| MGYG-HGUT-03273:s__Lachnospiraceae unknown_28 | 0.6<br>75<br>94<br>80<br>19 | -<br>0.1<br>16<br>71<br>81        | 0.9<br>75<br>67<br>17<br>57 | d_<br>_B<br>act<br>eri<br>a | p_<br>Fi<br>rmicu<br>tes_A         | c_<br>Clo<br>stridia         | o_<br>Lac<br>hnospi<br>rales   | f_<br>Lach<br>nospirac<br>eae   | g_<br>Lachno<br>spiraceae<br>unknown | s_<br>Lachnospir<br>aceae<br>unknown<br>unknown_28 |
| MGYG-HGUT-03274:s__Collinsella unknown_362    | 0.9<br>01<br>18<br>11<br>88 | -<br>0.0<br>33<br>13<br>93<br>1   | 0.9<br>94<br>47<br>94<br>74 | d_<br>_B<br>act<br>eri<br>a | p_<br>A<br>ctino<br>bacte<br>riota | c_<br>Co<br>riobac<br>teriia | o_<br>Cor<br>iobact<br>eriales | f_<br>Cori<br>obacteri<br>aceae | g_<br>Collins<br>ella                | s_<br>Collinsella<br>unknown_36<br>2               |
| MGYG-HGUT-03275:s__Collinsella unknown_363    | 0.8<br>98<br>00<br>71<br>17 | 0.0<br>35<br>47<br>41<br>94       | 0.9<br>94<br>47<br>94<br>74 | d_<br>_B<br>act<br>eri<br>a | p_<br>A<br>ctino<br>bacte<br>riota | c_<br>Co<br>riobac<br>teriia | o_<br>Cor<br>iobact<br>eriales | f_<br>Cori<br>obacteri<br>aceae | g_<br>Collins<br>ella                | s_<br>Collinsella<br>unknown_36<br>3               |
| MGYG-HGUT-03276:s__Collinsella unknown_364    | 0.3<br>75<br>96<br>87<br>63 | 0.2<br>47<br>81<br>85<br>09       | 0.9<br>39<br>70<br>92<br>5  | d_<br>_B<br>act<br>eri<br>a | p_<br>A<br>ctino<br>bacte<br>riota | c_<br>Co<br>riobac<br>teriia | o_<br>Cor<br>iobact<br>eriales | f_<br>Cori<br>obacteri<br>aceae | g_<br>Collins<br>ella                | s_<br>Collinsella<br>unknown_36<br>4               |
| MGYG-HGUT-03279:s__Alistipes unknown_13       | 0.9<br>68<br>78<br>67<br>51 | -<br>0.0<br>10<br>61<br>52<br>04  | 0.9<br>94<br>47<br>94<br>74 | d_<br>_B<br>act<br>eri<br>a | p_<br>B<br>acter<br>oidot<br>a     | c_<br>Ba<br>cteroi<br>dia    | o_<br>Bac<br>teroida<br>les    | f_<br>Rike<br>nellacea<br>e     | g_<br>Alistipe<br>s                  | s_<br>Alistipes<br>unknown_13                      |
| MGYG-HGUT-03281:s__Collinsella unknown_365    | 0.5<br>05<br>70             | 0.1<br>86<br>21                   | 0.9<br>68<br>53             | d_<br>_B<br>act             | p_<br>A<br>ctino                   | c_<br>Co<br>riobac<br>teriia | o_<br>Cor<br>iobact<br>eriales | f_<br>Cori<br>obacteri<br>aceae | g_<br>Collins<br>ella                | s_<br>Collinsella<br>unknown_36<br>5               |

|                                                         |                             |                                  |                             |                             |                                     |                               |                                       |                                    |                                        |                                                      |
|---------------------------------------------------------|-----------------------------|----------------------------------|-----------------------------|-----------------------------|-------------------------------------|-------------------------------|---------------------------------------|------------------------------------|----------------------------------------|------------------------------------------------------|
|                                                         | 98<br>86                    | 64<br>48                         | 20<br>73                    | eri<br>a                    | bacte<br>riota                      |                               |                                       |                                    |                                        |                                                      |
| MGYG-HGUT-03284:s__CAG-269 unknown_21                   | 0.9<br>05<br>03<br>20<br>24 | 0.0<br>33<br>27<br>70<br>96      | 0.9<br>94<br>47<br>94<br>74 | d_<br>_B<br>act<br>eri<br>a | p_<br>_Fi<br>rmicu<br>tes_A         | c_<br>_Clo<br>stridia         | o_<br>_TA<br>NB77                     | f_<br>_CAG-<br>508                 | g_<br>_CAG-<br>269                     | s_<br>_CAG-269<br>unknown_21                         |
| MGYG-HGUT-03286:s__Coproba cter unknown_2               | 0.7<br>42<br>29<br>36<br>02 | 0.0<br>91<br>53<br>99<br>68      | 0.9<br>79<br>45<br>84<br>75 | d_<br>_B<br>act<br>eri<br>a | p_<br>_B<br>acter<br>oidot<br>a     | c_<br>_Ba<br>cteroi<br>dia    | o_<br>_Bac<br>teroida<br>les          | f_<br>_Copr<br>obacter<br>aceae    | g_<br>_Copro<br>bacter                 | s_<br>_Copro<br>bacter<br>unknown_2                  |
| MGYG-HGUT-03287:s__Prevotella melaninogenica            | 0.4<br>21<br>72<br>87<br>77 | -<br>0.2<br>23<br>79<br>34<br>23 | 0.9<br>42<br>03<br>66<br>55 | d_<br>_B<br>act<br>eri<br>a | p_<br>_B<br>acter<br>oidot<br>a     | c_<br>_Ba<br>cteroi<br>dia    | o_<br>_Bac<br>teroida<br>les          | f_<br>_Bact<br>eroidac<br>eae      | g_<br>_Prevot<br>ella                  | s_<br>_Prevotella<br>melaninogeni<br>ca              |
| MGYG-HGUT-03291:s__Faecalibacterium unknown_12          | 0.1<br>19<br>88<br>12<br>91 | 0.4<br>31<br>82<br>85<br>93      | 0.8<br>83<br>30<br>72<br>56 | d_<br>_B<br>act<br>eri<br>a | p_<br>_Fi<br>rmicu<br>tes_A         | c_<br>_Clo<br>stridia         | o_<br>_Os<br>cillospi<br>rales        | f_<br>_Rumi<br>nococca<br>ceae     | g_<br>_Faecali<br>bacterium            | s_<br>_Faecalibac<br>terium<br>unknown_12            |
| MGYG-HGUT-03293:s__CAG-110 unknown_25                   | 0.0<br>85<br>55<br>52<br>18 | 0.4<br>57<br>70<br>52<br>83      | 0.8<br>82<br>71<br>60<br>64 | d_<br>_B<br>act<br>eri<br>a | p_<br>_Fi<br>rmicu<br>tes_A         | c_<br>_Clo<br>stridia         | o_<br>_Os<br>cillospi<br>rales        | f_<br>_Oscil<br>lospirac<br>eae    | g_<br>_CAG-<br>110                     | s_<br>_CAG-110<br>unknown_25                         |
| MGYG-HGUT-03294:s__Selenomonas_A unknown                | 0.0<br>26<br>45<br>06<br>14 | 0.6<br>07<br>54<br>96<br>28      | 0.7<br>68<br>22<br>58<br>34 | d_<br>_B<br>act<br>eri<br>a | p_<br>_Fi<br>rmicu<br>tes_C         | c_<br>_Ne<br>gativic<br>utes  | o_<br>_Sel<br>enomo<br>nadale<br>s    | f_<br>_Sele<br>nomona<br>daceae    | g_<br>_Seleno<br>monas_A               | s_<br>_Selenomo<br>nas_A<br>unknown                  |
| MGYG-HGUT-03297:s__Oscillosp iraceae unknown unknown_17 | 0.4<br>13<br>80<br>72<br>71 | -<br>0.2<br>17<br>47<br>05<br>31 | 0.9<br>39<br>70<br>92<br>5  | d_<br>_B<br>act<br>eri<br>a | p_<br>_Fi<br>rmicu<br>tes_A         | c_<br>_Clo<br>stridia         | o_<br>_Os<br>cillospi<br>rales        | f_<br>_Oscil<br>lospirac<br>eae    | g_<br>_Oscillo<br>spiraceae<br>unknown | s_<br>_Oscillospir<br>aceae<br>unknown<br>unknown_17 |
| MGYG-HGUT-03303:s__Senegali massilia unknown_4          | 0.7<br>29<br>02<br>45<br>92 | 0.0<br>96<br>64<br>89<br>49      | 0.9<br>79<br>45<br>84<br>75 | d_<br>_B<br>act<br>eri<br>a | p_<br>_A<br>ctino<br>bacte<br>riota | c_<br>_Co<br>riobac<br>teriia | o_<br>_Cor<br>iobact<br>eriales       | f_<br>_Egge<br>rthellac<br>eae     | g_<br>_Senega<br>limassilia            | s_<br>_Senegalim<br>assilia<br>unknown_4             |
| MGYG-HGUT-03304:s__QANA01 unknown_3                     | 0.7<br>00<br>93             | 0.1<br>00<br>40                  | 0.9<br>79<br>45             | d_<br>_B<br>act             | p_<br>_Fi<br>rmicu<br>tes_A         | c_<br>_Clo<br>stridia         | o_<br>_Chr<br>istense<br>nellale<br>s | f_<br>_Chris<br>tensene<br>llaceae | g_<br>_QANA0<br>1                      | s_<br>_QANA01<br>unknown_3                           |



|                                                 |                             |                                  |                             |                             |                                 |                                        |                                   |                                          |                         |                                        |
|-------------------------------------------------|-----------------------------|----------------------------------|-----------------------------|-----------------------------|---------------------------------|----------------------------------------|-----------------------------------|------------------------------------------|-------------------------|----------------------------------------|
|                                                 | 01<br>18                    | 10<br>3                          | 84<br>75                    | eri<br>a                    |                                 |                                        |                                   |                                          |                         |                                        |
| MGYG-HGUT-03306:s__CAG-448 sp003150135          | 0.9<br>52<br>26<br>70<br>25 | 0.0<br>15<br>98<br>99<br>39      | 0.9<br>94<br>47<br>94<br>74 | d_<br>_B<br>act<br>eri<br>a | p__Fi<br>rmicu<br>tes_A         | c__Clo<br>stridia                      | o__Os<br>cillospi<br>rales        | f__CAG-<br>272                           | g__CAG-<br>448          | s__CAG-448<br>sp003150135              |
| MGYG-HGUT-03311:s__Angelakisella unknown_2      | 0.0<br>03<br>17<br>82<br>49 | 0.7<br>69<br>49<br>17<br>38      | 0.6<br>48<br>12<br>43<br>72 | d_<br>_B<br>act<br>eri<br>a | p__Fi<br>rmicu<br>tes_A         | c__Clo<br>stridia                      | o__Os<br>cillospi<br>rales        | f__Rumi<br>nococca<br>ceae               | g__Angela<br>kisella    | s__Angelakise<br>lla<br>unknown_2      |
| MGYG-HGUT-03312:s__Bacteroides unknown_9        | 0.9<br>59<br>72<br>98<br>97 | 0.0<br>14<br>15<br>22<br>72      | 0.9<br>94<br>47<br>94<br>74 | d_<br>_B<br>act<br>eri<br>a | p__B<br>acter<br>oidot<br>a     | c__Ba<br>cteroi<br>dia                 | o__Bac<br>teroida<br>les          | f__Bact<br>eroidac<br>eae                | g__Bacter<br>oides      | s__Bacteroides<br>unknown_9            |
| MGYG-HGUT-03315:s__Collinsella unknown_366      | 0.6<br>89<br>50<br>54<br>98 | -<br>0.1<br>11<br>85<br>01<br>68 | 0.9<br>75<br>76<br>85<br>79 | d_<br>_B<br>act<br>eri<br>a | p__A<br>ctino<br>bacte<br>riota | c__Co<br>riobac<br>teriia              | o__Cor<br>iobact<br>eriales       | f__Cori<br>obacteri<br>aceae             | g__Collins<br>ella      | s__Collinsella<br>unknown_366          |
| MGYG-HGUT-03316:s__Faecalicatena unknown_11     | 0.3<br>86<br>92<br>82<br>28 | -<br>0.2<br>39<br>36<br>67<br>83 | 0.9<br>39<br>70<br>92<br>5  | d_<br>_B<br>act<br>eri<br>a | p__Fi<br>rmicu<br>tes_A         | c__Clo<br>stridia                      | o__Lac<br>hnospi<br>rales         | f__Lach<br>nospirac<br>eae               | g__Faecali<br>catena    | s__Faecalicat<br>ena<br>unknown_11     |
| MGYG-HGUT-03318:s__Duodenibacillus massiliensis | 0.9<br>57<br>02<br>30<br>84 | 0.0<br>14<br>41<br>30<br>97      | 0.9<br>94<br>47<br>94<br>74 | d_<br>_B<br>act<br>eri<br>a | p__Pr<br>oteob<br>acteri<br>a   | c__Ga<br>mmap<br>roteo<br>bacter<br>ia | o__Bur<br>kholde<br>riales        | f__Burk<br>holderia<br>ceae              | g__Duode<br>nibacillus  | s__Duodenib<br>acillus<br>massiliensis |
| MGYG-HGUT-03320:s__Catenibacterium unknown_4    | 0.8<br>08<br>25<br>43<br>04 | 0.0<br>67<br>37<br>69<br>68      | 0.9<br>87<br>14<br>23<br>02 | d_<br>_B<br>act<br>eri<br>a | p__Fi<br>rmicu<br>tes           | c__Ba<br>cilli                         | o__Ery<br>sipelot<br>richale<br>s | f__Erysi<br>pelatocl<br>ostridia<br>ceae | g__Cateni<br>bacterium  | s__Catenibact<br>erium<br>unknown_4    |
| MGYG-HGUT-03322:s__Collinsella unknown_367      | 0.6<br>33<br>67<br>30<br>79 | 0.1<br>27<br>08<br>26<br>7       | 0.9<br>75<br>67<br>17<br>57 | d_<br>_B<br>act<br>eri<br>a | p__A<br>ctino<br>bacte<br>riota | c__Co<br>riobac<br>teriia              | o__Cor<br>iobact<br>eriales       | f__Cori<br>obacteri<br>aceae             | g__Collins<br>ella      | s__Collinsella<br>unknown_367          |
| MGYG-HGUT-03323:s__Faecalibacterium unknown_13  | 0.2<br>76<br>17             | 0.2<br>97<br>59                  | 0.9<br>29<br>02             | d_<br>_B<br>act             | p__Fi<br>rmicu<br>tes_A         | c__Clo<br>stridia                      | o__Os<br>cillospi<br>rales        | f__Rumi<br>nococca<br>ceae               | g__Faecali<br>bacterium | s__Faecalibac<br>terium<br>unknown_13  |

|                                               |                             |                                  |                             |                             |                             |                           |                                     |                                |                                    |                                                 |
|-----------------------------------------------|-----------------------------|----------------------------------|-----------------------------|-----------------------------|-----------------------------|---------------------------|-------------------------------------|--------------------------------|------------------------------------|-------------------------------------------------|
|                                               | 83<br>42                    | 46<br>9                          | 59<br>13                    | eri<br>a                    |                             |                           |                                     |                                |                                    |                                                 |
| MGYG-HGUT-03324:s__Mogibacterium unknown_1    | 0.9<br>57<br>29<br>13<br>53 | 0.0<br>15<br>02<br>31<br>12      | 0.9<br>94<br>47<br>94<br>74 | d_<br>_B<br>act<br>eri<br>a | p__Fi<br>rmicu<br>tes_A     | c__Clo<br>stridia         | o__Pe<br>ptostre<br>ptococ<br>cales | f__Anae<br>rorovac<br>aceae    | g__Mogib<br>acterium               | s__Mogibacte<br>rium<br>unknown_1               |
| MGYG-HGUT-03326:s__Blautia unknown_11         | 0.7<br>95<br>17<br>13<br>94 | 0.0<br>72<br>95<br>43<br>14      | 0.9<br>82<br>96<br>63       | d_<br>_B<br>act<br>eri<br>a | p__Fi<br>rmicu<br>tes_A     | c__Clo<br>stridia         | o__Lac<br>hnospi<br>rales           | f__Lach<br>nospi<br>rac<br>eae | g__Blautia                         | s__Blautia<br>unknown_11                        |
| MGYG-HGUT-03327:s__Lawsonibacter unknown_9    | 0.4<br>96<br>09<br>54<br>31 | -<br>0.1<br>89<br>07<br>38<br>54 | 0.9<br>68<br>53<br>20<br>73 | d_<br>_B<br>act<br>eri<br>a | p__Fi<br>rmicu<br>tes_A     | c__Clo<br>stridia         | o__Os<br>cillospi<br>rales          | f__Oscil<br>lospirac<br>eae    | g__Lawson<br>ibacter               | s__Lawsoniba<br>cter<br>unknown_9               |
| MGYG-HGUT-03331:s__Megasphaera sp001546855    | 0.5<br>90<br>65<br>47<br>2  | -<br>0.1<br>49<br>55<br>22<br>99 | 0.9<br>75<br>67<br>17<br>57 | d_<br>_B<br>act<br>eri<br>a | p__Fi<br>rmicu<br>tes_C     | c__Ne<br>gativic<br>utes  | o__Vei<br>llonella<br>les           | f__Meg<br>asphaer<br>aceae     | g__Megas<br>phaera                 | s__Megaspha<br>era<br>sp001546855               |
| MGYG-HGUT-03332:s__Prevotella unknown_40      | 0.5<br>78<br>02<br>87<br>45 | 0.1<br>43<br>47<br>36<br>13      | 0.9<br>75<br>67<br>17<br>57 | d_<br>_B<br>act<br>eri<br>a | p__B<br>acter<br>oidot<br>a | c__Ba<br>cteroi<br>dia    | o__Bac<br>teroida<br>les            | f__Bact<br>eroidac<br>eae      | g__Prevot<br>ella                  | s__Prevotella<br>unknown_40                     |
| MGYG-HGUT-03335:s__GCA-900066135 unknown      | 0.1<br>89<br>05<br>34<br>53 | 0.3<br>52<br>27<br>07<br>95      | 0.8<br>91<br>82<br>55<br>59 | d_<br>_B<br>act<br>eri<br>a | p__Fi<br>rmicu<br>tes_A     | c__Clo<br>stridia         | o__Lac<br>hnospi<br>rales           | f__Lach<br>nospi<br>rac<br>eae | g__GCA-<br>90006613<br>5           | s__GCA-<br>900066135<br>unknown                 |
| MGYG-HGUT-03336:s__Veillonella dispar_3       | 0.5<br>90<br>89<br>29<br>25 | 0.1<br>50<br>40<br>50<br>81      | 0.9<br>75<br>67<br>17<br>57 | d_<br>_B<br>act<br>eri<br>a | p__Fi<br>rmicu<br>tes_C     | c__Ne<br>gativic<br>utes  | o__Vei<br>llonella<br>les           | f__Veill<br>onellace<br>ae     | g__Veillon<br>ella                 | s__Veillonella<br>dispar_3                      |
| MGYG-HGUT-03337:s__Ruminococcaceae unknown_20 | 0.8<br>50<br>12<br>00<br>02 | -<br>0.0<br>52<br>05<br>36<br>48 | 0.9<br>92<br>87<br>80<br>88 | d_<br>_B<br>act<br>eri<br>a | p__Fi<br>rmicu<br>tes_A     | c__Clo<br>stridia         | o__Os<br>cillospi<br>rales          | f__Rumi<br>nococca<br>ceae     | g__Rumin<br>ococcacea<br>e unknown | s__Ruminoco<br>ccaceae<br>unknown<br>unknown_20 |
| MGYG-HGUT-03339:s__Collinsella unknown_369    | 0.2<br>01<br>85             | 0.3<br>54<br>94                  | 0.8<br>91<br>82             | d_<br>_B<br>act             | p__A<br>ctino               | c__Co<br>riobac<br>teriia | o__Cor<br>iobact<br>eriales         | f__Cori<br>obacteri<br>aceae   | g__Collins<br>ella                 | s__Collinsella<br>unknown_36<br>9               |

|                                               |                             |                                  |                             |                             |                                 |                           |                             |                                |                    |                                      |
|-----------------------------------------------|-----------------------------|----------------------------------|-----------------------------|-----------------------------|---------------------------------|---------------------------|-----------------------------|--------------------------------|--------------------|--------------------------------------|
|                                               | 87<br>23                    | 75<br>85                         | 55<br>59                    | eri<br>a                    | bacte<br>riota                  |                           |                             |                                |                    |                                      |
| MGYG-HGUT-03340:s__Blautia sp900120295        | 0.1<br>20<br>03<br>71<br>66 | 0.3<br>81<br>25<br>87<br>4       | 0.8<br>83<br>30<br>72<br>56 | d_<br>_B<br>act<br>eri<br>a | p__Fi<br>rmicu<br>tes_A         | c__Clo<br>stridia         | o__Lac<br>hnospi<br>rales   | f__Lach<br>nospi<br>rac<br>eae | g__Blautia         | s__Blautia<br>sp900120295            |
| MGYG-HGUT-03341:s__Collinsella unknown_370    | 0.1<br>05<br>78<br>56<br>02 | 0.4<br>27<br>74<br>92<br>37      | 0.8<br>83<br>30<br>72<br>56 | d_<br>_B<br>act<br>eri<br>a | p__A<br>ctino<br>bacte<br>riota | c__Co<br>riobac<br>teriia | o__Cor<br>iobact<br>eriales | f__Cori<br>obacteri<br>aceae   | g__Collins<br>ella | s__Collinsella<br>unknown_370        |
| MGYG-HGUT-03342:s__Collinsella sp002232035_31 | 0.6<br>27<br>34<br>13<br>29 | 0.1<br>36<br>05<br>65<br>67      | 0.9<br>75<br>67<br>17<br>57 | d_<br>_B<br>act<br>eri<br>a | p__A<br>ctino<br>bacte<br>riota | c__Co<br>riobac<br>teriia | o__Cor<br>iobact<br>eriales | f__Cori<br>obacteri<br>aceae   | g__Collins<br>ella | s__Collinsella<br>sp002232035<br>_31 |
| MGYG-HGUT-03344:s__Dialister unknown_11       | 0.8<br>17<br>15<br>61<br>17 | -<br>0.0<br>64<br>93<br>14<br>47 | 0.9<br>87<br>66<br>45<br>39 | d_<br>_B<br>act<br>eri<br>a | p__Fi<br>rmicu<br>tes_C         | c__Ne<br>gativic<br>utes  | o__Vei<br>llonella<br>les   | f__Diali<br>steracea<br>e      | g__Dialiste<br>r   | s__Dialister<br>unknown_11           |
| MGYG-HGUT-03346:s__Prevotella unknown_41      | 0.2<br>00<br>81<br>79<br>98 | -<br>0.3<br>57<br>64<br>68<br>24 | 0.8<br>91<br>82<br>55<br>59 | d_<br>_B<br>act<br>eri<br>a | p__B<br>acter<br>oidot<br>a     | c__Ba<br>cteroi<br>dia    | o__Bac<br>teroida<br>les    | f__Bact<br>eroidac<br>eae      | g__Prevot<br>ella  | s__Prevotella<br>unknown_41          |
| MGYG-HGUT-03347:s__Prevotella unknown_42      | 0.4<br>11<br>64<br>89<br>34 | -<br>0.2<br>20<br>61<br>98<br>66 | 0.9<br>39<br>70<br>92<br>5  | d_<br>_B<br>act<br>eri<br>a | p__B<br>acter<br>oidot<br>a     | c__Ba<br>cteroi<br>dia    | o__Bac<br>teroida<br>les    | f__Bact<br>eroidac<br>eae      | g__Prevot<br>ella  | s__Prevotella<br>unknown_42          |
| MGYG-HGUT-03348:s__Dialister unknown_12       | 0.2<br>60<br>75<br>59<br>69 | 0.3<br>13<br>67<br>49<br>58      | 0.9<br>13<br>13<br>14<br>21 | d_<br>_B<br>act<br>eri<br>a | p__Fi<br>rmicu<br>tes_C         | c__Ne<br>gativic<br>utes  | o__Vei<br>llonella<br>les   | f__Diali<br>steracea<br>e      | g__Dialiste<br>r   | s__Dialister<br>unknown_12           |
| MGYG-HGUT-03351:s__Bacteroides unknown_10     | 0.2<br>29<br>19<br>23<br>4  | -<br>0.3<br>36<br>55<br>95<br>7  | 0.9<br>02<br>18<br>13<br>67 | d_<br>_B<br>act<br>eri<br>a | p__B<br>acter<br>oidot<br>a     | c__Ba<br>cteroi<br>dia    | o__Bac<br>teroida<br>les    | f__Bact<br>eroidac<br>eae      | g__Bacter<br>oides | s__Bacteroides<br>unknown_10         |

|                                                      |             |              |             |             |                   |                        |                      |                       |                     |                                      |
|------------------------------------------------------|-------------|--------------|-------------|-------------|-------------------|------------------------|----------------------|-----------------------|---------------------|--------------------------------------|
| MGYG-HGUT-03352:s__Parasutterella unknown_3          | 0.890494596 | 0.038429192  | 0.994479474 | d__Bacteria | p__Proteobacteria | c__Gammaproteobacteria | o__Burkholderiales   | f__Burkholderiaceae   | g__Parasutterella   | s__Parasutterella unknown_3          |
| MGYG-HGUT-03353:s__Prevotella corporis               | 0.287459894 | 0.294390287  | 0.929025913 | d__Bacteria | p__Bacteroidota   | c__Bacteroidia         | o__Bacteroidales     | f__Bacteroidaceae     | g__Prevotella       | s__Prevotella corporis               |
| MGYG-HGUT-03354:s__Faecalibacterium unknown_12       | 0.497599517 | -0.189897441 | 0.968532073 | d__Bacteria | p__Firmicutes_A   | c__Clostridia          | o__Lachnospirales    | f__Lachnospiraceae    | g__Faecalibacterium | s__Faecalibacterium unknown_12       |
| MGYG-HGUT-03355:s__Lachnospirillum phytofermentans_A | 0.087557959 | -0.45551165  | 0.882716064 | d__Bacteria | p__Firmicutes_A   | c__Clostridia          | o__Lachnospirales    | f__Lachnospiraceae    | g__Lachnospirillum  | s__Lachnospirillum phytofermentans_A |
| MGYG-HGUT-03358:s__Kluyvera ascorbata                | 0.768939296 | 0.077334549  | 0.979520484 | d__Bacteria | p__Proteobacteria | c__Gammaproteobacteria | o__Enterobacteriales | f__Enterobacteriaceae | g__Kluyvera         | s__Kluyvera ascorbata                |
| MGYG-HGUT-03361:s__Collinsella unknown_371           | 0.483637361 | 0.187892306  | 0.968532073 | d__Bacteria | p__Actinobacteria | c__Coriobacteriia      | o__Coriobacteriales  | f__Coriobacteriaceae  | g__Collinsella      | s__Collinsella unknown_371           |
| MGYG-HGUT-03365:s__Pseudoscherichia sp002298805      | 0.544795464 | -0.166510852 | 0.968532073 | d__Bacteria | p__Proteobacteria | c__Gammaproteobacteria | o__Enterobacteriales | f__Enterobacteriaceae | g__Pseudoscherichia | s__Pseudoscherichia sp002298805      |
| MGYG-HGUT-03370:s__Streptococcus mitis_AC            | 0.834913843 | -0.057579836 | 0.992675341 | d__Bacteria | p__Firmicutes     | c__Bacilli             | o__Lactobacillales   | f__Streptococcaceae   | g__Streptococcus    | s__Streptococcus mitis_AC            |
| MGYG-HGUT-03372:s__Citrobacter werkmanii             | 0.37504     | 0.22306      | 0.93970     | d__Bacteria | p__Proteobacteria | c__Gammaproteobacteria | o__Enterobacteriales | f__Enterobacteriaceae | g__Citrobacter      | s__Citrobacter werkmanii             |

|                                                      |                             |                                  |                             |                             |                                     |                                        |                                  |                                  |                                     |                                                |
|------------------------------------------------------|-----------------------------|----------------------------------|-----------------------------|-----------------------------|-------------------------------------|----------------------------------------|----------------------------------|----------------------------------|-------------------------------------|------------------------------------------------|
|                                                      | 45<br>44                    | 85<br>56                         | 92<br>5                     | eri<br>a                    |                                     | bacter<br>ia                           |                                  |                                  |                                     |                                                |
| MGYG-HGUT-03374:s__Prevotella bivia                  | 0.4<br>36<br>93<br>50<br>8  | -<br>0.2<br>17<br>13<br>98<br>79 | 0.9<br>51<br>03<br>89<br>63 | d_<br>_B<br>act<br>eri<br>a | p__B<br>acter<br>oidot<br>a         | c__Ba<br>cteroi<br>dia                 | o__Bac<br>teroida<br>les         | f__Bact<br>eroidac<br>eae        | g__Prevot<br>ella                   | s__Prevotella<br>bivia                         |
| MGYG-HGUT-03383:s__Bifidobacterium scardovii         | 0.7<br>02<br>76<br>15<br>43 | 0.1<br>04<br>98<br>70<br>02      | 0.9<br>79<br>45<br>84<br>75 | d_<br>_B<br>act<br>eri<br>a | p__A<br>ctino<br>bacte<br>riota     | c__Ac<br>tinoba<br>cteria              | o__Act<br>inomyc<br>etales       | f__Bifid<br>obacteri<br>aceae    | g__Bifidob<br>acterium              | s__Bifidobact<br>erium<br>scardovii            |
| MGYG-HGUT-03385:s__Ureaplasma parvum                 | 0.9<br>52<br>11<br>67<br>18 | -<br>0.0<br>16<br>60<br>04<br>05 | 0.9<br>94<br>47<br>94<br>74 | d_<br>_B<br>act<br>eri<br>a | p__Fi<br>rmicu<br>tes               | c__Ba<br>cilli                         | o__My<br>coplas<br>matale<br>s   | f__Myc<br>oplasm<br>oidacea<br>e | g__Ureapl<br>asma                   | s__Ureaplasma<br>parvum                        |
| MGYG-HGUT-03392:s__Streptococcus mitis               | 0.0<br>60<br>96<br>53<br>71 | 0.5<br>17<br>43<br>43<br>4       | 0.8<br>57<br>21<br>13<br>2  | d_<br>_B<br>act<br>eri<br>a | p__Fi<br>rmicu<br>tes               | c__Ba<br>cilli                         | o__Lac<br>tobacill<br>ales       | f__Stre<br>ptococc<br>aceae      | g__Strepto<br>coccus                | s__Streptococ<br>cus mitis                     |
| MGYG-HGUT-03395:s__RIT-PI-d unknown                  | 0.7<br>77<br>54<br>98<br>29 | -<br>0.0<br>74<br>71<br>73<br>24 | 0.9<br>79<br>52<br>04<br>84 | d_<br>_B<br>act<br>eri<br>a | p__Pr<br>oteob<br>acteri<br>a       | c__Ga<br>mmap<br>roteo<br>bacter<br>ia | o__Ent<br>erobac<br>terales      | f__Ente<br>robacte<br>riaceae    | g__RIT-PI-<br>d                     | s__RIT-PI-d<br>unknown                         |
| MGYG-HGUT-03397:s__F0422 unknown_4                   | 0.7<br>14<br>43<br>84<br>25 | 0.1<br>02<br>44<br>08<br>54      | 0.9<br>79<br>45<br>84<br>75 | d_<br>_B<br>act<br>eri<br>a | p__Fi<br>rmicu<br>tes_C             | c__Ne<br>gativic<br>utes               | o__Vei<br>llonella<br>les        | f__Veill<br>onellace<br>ae       | g__F0422                            | s__F0422<br>unknown_4                          |
| MGYG-HGUT-03398:s__Helicobacteraceae unknown unknown | 0.2<br>74<br>31<br>94<br>59 | -<br>0.3<br>01<br>00<br>58<br>91 | 0.9<br>29<br>02<br>59<br>13 | d_<br>_B<br>act<br>eri<br>a | p__C<br>ampy<br>lobac<br>terot<br>a | c__Ca<br>mpylo<br>bacter<br>ia         | o__Ca<br>mpylo<br>bacter<br>ales | f__Helic<br>obacter<br>aceae     | g__Helicob<br>acteraceae<br>unknown | s__Helicobact<br>eraceae<br>unknown<br>unknown |
| MGYG-HGUT-03402:s__Paenibacillus lactis              | 0.3<br>18<br>32<br>21<br>55 | 0.2<br>78<br>16<br>09<br>3       | 0.9<br>29<br>02<br>59<br>13 | d_<br>_B<br>act<br>eri<br>a | p__Fi<br>rmicu<br>tes_I             | c__Ba<br>cilli_A                       | o__Pa<br>enibaci<br>llales       | f__Paen<br>ibacillac<br>eae      | g__Paenib<br>acillus                | s__Paenibacill<br>us lactis                    |

|                                                       |             |              |             |            |                   |                   |                       |                       |                            |                                       |
|-------------------------------------------------------|-------------|--------------|-------------|------------|-------------------|-------------------|-----------------------|-----------------------|----------------------------|---------------------------------------|
| MGYG-HGUT-03409:s__CAG-110 unknown_26                 | 0.18931768  | 0.351030613  | 0.891825559 | d__Bacteri | p__Firmicutes_A   | c__Clostridia     | o__Oscillospira       | f__Oscillospiraceae   | g__CAG-110                 | s__CAG-110 unknown_26                 |
| MGYG-HGUT-03411:s__CAG-568 sp000434395                | 0.554831736 | -0.162177433 | 0.968532073 | d__Bacteri | p__Firmicutes     | c__Bacilli        | o__RFN20              | f__CAG-288            | g__CAG-568                 | s__CAG-568 sp000434395                |
| MGYG-HGUT-03417:s__CAG-74 unknown unknown_17          | 0.19311562  | 0.35777459   | 0.891825559 | d__Bacteri | p__Firmicutes_A   | c__Clostridia     | o__Christensenellales | f__CAG-74             | g__CAG-74 unknown          | s__CAG-74 unknown unknown_17          |
| MGYG-HGUT-03418:s__Collinsella unknown_373            | 0.48031605  | 0.188676272  | 0.968532073 | d__Bacteri | p__Actinobacteria | c__Coriobacteriia | o__Coriobacteriales   | f__Coriobacteriaceae  | g__Collinsella             | s__Collinsella unknown_373            |
| MGYG-HGUT-03425:s__CAG-127 unknown_3                  | 0.356083397 | 0.253988526  | 0.93970925  | d__Bacteri | p__Firmicutes_A   | c__Clostridia     | o__Lachnospirales     | f__Lachnospiraceae    | g__CAG-127                 | s__CAG-127 unknown_3                  |
| MGYG-HGUT-03427:s__Lachnospiraceae unknown unknown_30 | 0.636017067 | 0.132183406  | 0.975671757 | d__Bacteri | p__Firmicutes_A   | c__Clostridia     | o__Lachnospirales     | f__Lachnospiraceae    | g__Lachnospiraceae unknown | s__Lachnospiraceae unknown unknown_30 |
| MGYG-HGUT-03439:s__Phascolarctobacterium faecium      | 0.7644508   | -0.083300521 | 0.979520484 | d__Bacteri | p__Firmicutes_C   | c__Negativicutes  | o__Acidimicrococcales | f__Acidimicrococaceae | g__Phascolarctobacterium   | s__Phascolarctobacterium faecium      |
| MGYG-HGUT-03452:s__Bifidobacterium ruminantium        | 0.667520583 | 0.115884917  | 0.975671757 | d__Bacteri | p__Actinobacteria | c__Actinobacteria | o__Actinomycetales    | f__Bifidobacteriaceae | g__Bifidobacterium         | s__Bifidobacterium ruminantium        |
| MGYG-HGUT-03458:s__CAG-127 unknown_4                  | 0.647086    | 0.122112584  | 0.975671757 | d__Bacteri | p__Firmicutes_A   | c__Clostridia     | o__Lachnospirales     | f__Lachnospiraceae    | g__CAG-127                 | s__CAG-127 unknown_4                  |

|                                            |                             |                                  |                             |                             |                                 |                           |                             |                               |                    |                               |
|--------------------------------------------|-----------------------------|----------------------------------|-----------------------------|-----------------------------|---------------------------------|---------------------------|-----------------------------|-------------------------------|--------------------|-------------------------------|
| MGYG-HGUT-03461:s__Prevotella unknown_43   | 0.4<br>96<br>74<br>26<br>59 | 0.1<br>83<br>75<br>89<br>1       | 0.9<br>68<br>53<br>20<br>73 | d_<br>_B<br>act<br>eri<br>a | p__B<br>acter<br>oidot<br>a     | c__Ba<br>cteroi<br>dia    | o__Bac<br>teroida<br>les    | f__Bact<br>eroidac<br>eae     | g__Prevot<br>ella  | s__Prevotella<br>unknown_43   |
| MGYG-HGUT-03462:s__Collinsella unknown_374 | 0.3<br>87<br>47<br>58<br>01 | 0.2<br>35<br>02<br>49<br>12      | 0.9<br>39<br>70<br>92<br>5  | d_<br>_B<br>act<br>eri<br>a | p__A<br>ctino<br>bacte<br>riota | c__Co<br>riobac<br>teriia | o__Cor<br>iobact<br>eriales | f__Cori<br>obacteri<br>aceae  | g__Collins<br>ella | s__Collinsella<br>unknown_374 |
| MGYG-HGUT-03465:s__CAG-841 unknown         | 0.9<br>47<br>06<br>01<br>73 | -<br>0.0<br>16<br>90<br>45<br>34 | 0.9<br>94<br>47<br>94<br>74 | d_<br>_B<br>act<br>eri<br>a | p__Fi<br>rmicu<br>tes_A         | c__Clo<br>stridia         | o__Os<br>cillospi<br>rales  | f__CAG-<br>272                | g__CAG-<br>841     | s__CAG-841<br>unknown         |
| MGYG-HGUT-03480:s__Prevotella unknown_44   | 0.2<br>70<br>90<br>72<br>19 | -<br>0.2<br>99<br>00<br>32<br>82 | 0.9<br>25<br>40<br>66<br>61 | d_<br>_B<br>act<br>eri<br>a | p__B<br>acter<br>oidot<br>a     | c__Ba<br>cteroi<br>dia    | o__Bac<br>teroida<br>les    | f__Bact<br>eroidac<br>eae     | g__Prevot<br>ella  | s__Prevotella<br>unknown_44   |
| MGYG-HGUT-03481:s__CAG-269 sp003525075     | 0.2<br>62<br>03<br>32<br>54 | -<br>0.3<br>08<br>96<br>53<br>81 | 0.9<br>13<br>13<br>14<br>21 | d_<br>_B<br>act<br>eri<br>a | p__Fi<br>rmicu<br>tes_A         | c__Clo<br>stridia         | o__TA<br>NB77               | f__CAG-<br>508                | g__CAG-<br>269     | s__CAG-269<br>sp003525075     |
| MGYG-HGUT-03484:s__RUG806 sp900313475      | 0.7<br>24<br>53<br>01<br>03 | -<br>0.0<br>97<br>76<br>90<br>15 | 0.9<br>79<br>45<br>84<br>75 | d_<br>_B<br>act<br>eri<br>a | p__Fi<br>rmicu<br>tes_A         | c__Clo<br>stridia         | o__Os<br>cillospi<br>rales  | f__Acut<br>alibacte<br>raceae | g__RUG80<br>6      | s__RUG806<br>sp900313475      |
| MGYG-HGUT-03486:s__CAG-95 sp000436115      | 0.0<br>12<br>69<br>31<br>31 | 0.6<br>77<br>08<br>24<br>22      | 0.7<br>68<br>22<br>58<br>34 | d_<br>_B<br>act<br>eri<br>a | p__Fi<br>rmicu<br>tes_A         | c__Clo<br>stridia         | o__Lac<br>hnospi<br>rales   | f__Lach<br>nospira<br>eae     | g__CAG-<br>95      | s__CAG-95<br>sp000436115      |
| MGYG-HGUT-03487:s__Olsenella_B unknown_2   | 0.9<br>57<br>81<br>93<br>88 | 0.0<br>14<br>39<br>53<br>07      | 0.9<br>94<br>47<br>94<br>74 | d_<br>_B<br>act<br>eri<br>a | p__A<br>ctino<br>bacte<br>riota | c__Co<br>riobac<br>teriia | o__Cor<br>iobact<br>eriales | f__Atop<br>obiacea<br>e       | g__Olsenel<br>la_B | s__Olsenella_<br>B unknown_2  |
| MGYG-HGUT-03488:s__CAG-488 unknown_2       | 0.6<br>66<br>86             | 0.1<br>19<br>40                  | 0.9<br>75<br>67             | d_<br>_B<br>act             | p__Fi<br>rmicu<br>tes_A         | c__Clo<br>stridia         | o__Os<br>cillospi<br>rales  | f__Acut<br>alibacte<br>raceae | g__CAG-<br>488     | s__CAG-488<br>unknown_2       |

|                                                                    |                             |                                  |                             |                             |                              |                                 |                                    |                                     |                                       |                                                    |
|--------------------------------------------------------------------|-----------------------------|----------------------------------|-----------------------------|-----------------------------|------------------------------|---------------------------------|------------------------------------|-------------------------------------|---------------------------------------|----------------------------------------------------|
|                                                                    | 06<br>43                    | 81<br>95                         | 17<br>57                    | eri<br>a                    |                              |                                 |                                    |                                     |                                       |                                                    |
| MGYG-HGUT-03489:s__Prevotell<br>amassilia<br>unknown_10            | 0.1<br>67<br>90<br>63<br>37 | -<br>0.3<br>83<br>82<br>35<br>5  | 0.8<br>91<br>82<br>55<br>59 | d_<br>_B<br>act<br>eri<br>a | p__B<br>acter<br>oidot<br>a  | c__Ba<br>cteroi<br>dia          | o__Bac<br>teroida<br>les           | f__Bact<br>eroidac<br>eae           | g__Prevot<br>ellamassili<br>a         | s__Prevotella<br>massilia<br>unknown_10            |
| MGYG-HGUT-03493:s__Prevotell<br>a sp002299275                      | 0.6<br>34<br>00<br>19<br>59 | 0.1<br>28<br>96<br>43<br>79      | 0.9<br>75<br>67<br>17<br>57 | d_<br>_B<br>act<br>eri<br>a | p__B<br>acter<br>oidot<br>a  | c__Ba<br>cteroi<br>dia          | o__Bac<br>teroida<br>les           | f__Bact<br>eroidac<br>eae           | g__Prevot<br>ella                     | s__Prevotella<br>sp002299275                       |
| MGYG-HGUT-03543:s__Bacteroi<br>daceae unknown<br>unknown_5         | 0.2<br>16<br>30<br>35<br>26 | -<br>0.3<br>38<br>01<br>09<br>31 | 0.8<br>91<br>82<br>55<br>59 | d_<br>_B<br>act<br>eri<br>a | p__B<br>acter<br>oidot<br>a  | c__Ba<br>cteroi<br>dia          | o__Bac<br>teroida<br>les           | f__Bact<br>eroidac<br>eae           | g__Bacter<br>oidaceae<br>unknown      | s__Bacteroida<br>ceae<br>unknown<br>unknown_5      |
| MGYG-HGUT-03551:s__Zag1<br>unknown_11                              | 0.1<br>12<br>40<br>30<br>09 | 0.4<br>12<br>35<br>23<br>59      | 0.8<br>83<br>30<br>72<br>56 | d_<br>_B<br>act<br>eri<br>a | p__C<br>yano<br>bacte<br>ria | c__Va<br>mpiro<br>vibrio<br>nia | o__Ga<br>strana<br>erophil<br>ales | f__Gast<br>ranaero<br>philacea<br>e | g__Zag1                               | s__Zag1<br>unknown_11                              |
| MGYG-HGUT-03552:s__CAG-127<br>unknown_5                            | 0.3<br>59<br>21<br>37<br>33 | -<br>0.2<br>50<br>23<br>29<br>85 | 0.9<br>39<br>70<br>92<br>5  | d_<br>_B<br>act<br>eri<br>a | p__Fi<br>rmicu<br>tes_A      | c__Clo<br>stridia               | o__Lac<br>hnospi<br>rales          | f__Lach<br>nospi<br>rac<br>eae      | g__CAG-<br>127                        | s__CAG-127<br>unknown_5                            |
| MGYG-HGUT-03581:s__Acutalib<br>acteraceae<br>unknown<br>unknown_49 | 0.5<br>52<br>03<br>94<br>88 | 0.1<br>65<br>46<br>35<br>5       | 0.9<br>68<br>53<br>20<br>73 | d_<br>_B<br>act<br>eri<br>a | p__Fi<br>rmicu<br>tes_A      | c__Clo<br>stridia               | o__Os<br>cillospi<br>rales         | f__Acut<br>alibacte<br>raceae       | g__Acutali<br>bacteracea<br>e unknown | s__Acutalibac<br>teraceae<br>unknown<br>unknown_49 |
| MGYG-HGUT-03583:s__Ruminoc<br>occaceae unknown<br>unknown_21       | 0.7<br>21<br>88<br>51<br>41 | 0.0<br>96<br>82<br>50<br>49      | 0.9<br>79<br>45<br>84<br>75 | d_<br>_B<br>act<br>eri<br>a | p__Fi<br>rmicu<br>tes_A      | c__Clo<br>stridia               | o__Os<br>cillospi<br>rales         | f__Rumi<br>nococca<br>ceae          | g__Rumin<br>ococcacea<br>e unknown    | s__Ruminoco<br>ccaceae<br>unknown<br>unknown_21    |
| MGYG-HGUT-03589:s__Oscilliba<br>cter unknown_19                    | 0.5<br>76<br>06<br>96<br>28 | 0.1<br>52<br>90<br>11<br>88      | 0.9<br>75<br>67<br>17<br>57 | d_<br>_B<br>act<br>eri<br>a | p__Fi<br>rmicu<br>tes_A      | c__Clo<br>stridia               | o__Os<br>cillospi<br>rales         | f__Oscil<br>lospirac<br>eae         | g__Oscillib<br>acter                  | s__Oscillibact<br>er<br>unknown_19                 |
| MGYG-HGUT-03593:s__Clostridi<br>um_M                               | 0.9<br>37<br>04             | -<br>0.0<br>22                   | 0.9<br>94<br>47             | d_<br>_B<br>act             | p__Fi<br>rmicu<br>tes_A      | c__Clo<br>stridia               | o__Lac<br>hnospi<br>rales          | f__Lach<br>nospi<br>rac<br>eae      | g__Clostri<br>dium_M                  | s__Clostridiu<br>m_M<br>unknown_15                 |



|                                                                  |                             |                                  |                             |                             |                                 |                           |                                   |                                          |                                   |                                                 |
|------------------------------------------------------------------|-----------------------------|----------------------------------|-----------------------------|-----------------------------|---------------------------------|---------------------------|-----------------------------------|------------------------------------------|-----------------------------------|-------------------------------------------------|
| um_M<br>unknown_15                                               | 32<br>49                    | 19<br>55<br>99                   | 94<br>74                    | eri<br>a                    |                                 |                           |                                   |                                          |                                   |                                                 |
| MGYG-HGUT-<br>03597:s__Oribacte<br>rium unknown_5                | 0.5<br>57<br>42<br>79<br>58 | 0.1<br>63<br>19<br>45<br>13      | 0.9<br>68<br>53<br>20<br>73 | d_<br>_B<br>act<br>eri<br>a | p__Fi<br>rmicu<br>tes_A         | c__Clo<br>stridia         | o__Lac<br>hnospi<br>rales         | f__Lach<br>nospirac<br>eae               | g__Oribact<br>erium               | s__Oribacteri<br>um<br>unknown_5                |
| MGYG-HGUT-<br>03598:s__UBA950<br>2 unknown_7                     | 0.6<br>16<br>48<br>15<br>66 | 0.1<br>39<br>34<br>80<br>9       | 0.9<br>75<br>67<br>17<br>57 | d_<br>_B<br>act<br>eri<br>a | p__Fi<br>rmicu<br>tes_A         | c__Clo<br>stridia         | o__Lac<br>hnospi<br>rales         | f__Lach<br>nospirac<br>eae               | g__UBA95<br>02                    | s__UBA9502<br>unknown_7                         |
| MGYG-HGUT-<br>03613:s__Lachnos<br>piraceae unknown<br>unknown_34 | 0.7<br>57<br>47<br>08<br>28 | -<br>0.0<br>86<br>30<br>53<br>57 | 0.9<br>79<br>45<br>84<br>75 | d_<br>_B<br>act<br>eri<br>a | p__Fi<br>rmicu<br>tes_A         | c__Clo<br>stridia         | o__Lac<br>hnospi<br>rales         | f__Lach<br>nospirac<br>eae               | g__Lachno<br>spiraceae<br>unknown | s__Lachnospi<br>raceae<br>unknown<br>unknown_34 |
| MGYG-HGUT-<br>03626:s__RC9<br>unknown_17                         | 0.9<br>83<br>99<br>21<br>44 | 0.0<br>05<br>63<br>33<br>91      | 0.9<br>98<br>80<br>33<br>46 | d_<br>_B<br>act<br>eri<br>a | p__B<br>acter<br>oidot<br>a     | c__Ba<br>cteroi<br>dia    | o__Bac<br>teroida<br>les          | f__UBA<br>932                            | g__RC9                            | s__RC9<br>unknown_17                            |
| MGYG-HGUT-<br>03647:s__Anaeroti<br>gnum unknown_4                | 0.6<br>41<br>85<br>14<br>06 | -<br>0.1<br>30<br>14<br>82<br>29 | 0.9<br>75<br>67<br>17<br>57 | d_<br>_B<br>act<br>eri<br>a | p__Fi<br>rmicu<br>tes_A         | c__Clo<br>stridia         | o__Lac<br>hnospi<br>rales         | f__Ana<br>erotignac<br>eae               | g__Anaero<br>tignum               | s__Anaerotig<br>num<br>unknown_4                |
| MGYG-HGUT-<br>03653:s__Cateniba<br>cterium<br>unknown_5          | 0.4<br>51<br>47<br>17<br>89 | -<br>0.2<br>08<br>55<br>75<br>97 | 0.9<br>61<br>29<br>22<br>08 | d_<br>_B<br>act<br>eri<br>a | p__Fi<br>rmicu<br>tes           | c__Ba<br>cilli            | o__Ery<br>sipelot<br>richale<br>s | f__Erysi<br>pelatocl<br>ostridia<br>ceae | g__Cateni<br>bacterium            | s__Catenibact<br>erium<br>unknown_5             |
| MGYG-HGUT-<br>03656:s__UBA141<br>7 sp003531055                   | 0.6<br>12<br>70<br>46<br>68 | 0.1<br>35<br>39<br>50<br>49      | 0.9<br>75<br>67<br>17<br>57 | d_<br>_B<br>act<br>eri<br>a | p__Fi<br>rmicu<br>tes_A         | c__Clo<br>stridia         | o__Os<br>cillospi<br>rales        | f__Acut<br>alibacte<br>raceae            | g__UBA14<br>17                    | s__UBA1417<br>sp003531055                       |
| MGYG-HGUT-<br>03657:s__Collinsell<br>a unknown_375               | 0.9<br>93<br>00<br>91<br>1  | -<br>0.0<br>02<br>46<br>15<br>88 | 0.9<br>98<br>80<br>33<br>46 | d_<br>_B<br>act<br>eri<br>a | p__A<br>ctino<br>bacte<br>riota | c__Co<br>riobac<br>teriia | o__Cor<br>iobact<br>eriales       | f__Cori<br>obacteri<br>aceae             | g__Collins<br>ella                | s__Collinsella<br>unknown_37<br>5               |

|                                                         |                                   |                                  |                             |                             |                             |                        |                            |                             |                               |                                         |
|---------------------------------------------------------|-----------------------------------|----------------------------------|-----------------------------|-----------------------------|-----------------------------|------------------------|----------------------------|-----------------------------|-------------------------------|-----------------------------------------|
| MGYG-HGUT-03661:s__Acetatifa<br>ctor unknown_7          | 0.4<br>07<br>66<br>28<br>98       | 0.2<br>31<br>50<br>89<br>58      | 0.9<br>39<br>70<br>92<br>5  | d_<br>_B<br>act<br>eri<br>a | p__Fi<br>rmicu<br>tes_A     | c__Clo<br>stridia      | o__Lac<br>hnospi<br>rales  | f__Lach<br>nospi<br>rales   | g__Acetati<br>factor          | s__Acetatifa<br>ctor<br>unknown_7       |
| MGYG-HGUT-03662:s__Prevotella<br>unknown_51             | 0.5<br>00<br>12<br>21<br>32       | 0.1<br>87<br>52<br>13<br>48      | 0.9<br>68<br>53<br>20<br>73 | d_<br>_B<br>act<br>eri<br>a | p__B<br>acter<br>oidot<br>a | c__Ba<br>cteroi<br>dia | o__Bac<br>teroida<br>les   | f__Bact<br>eroidac<br>eae   | g__Prevot<br>ella             | s__Prevotella<br>unknown_51             |
| MGYG-HGUT-03664:s__CAG-170<br>unknown_9                 | 0.8<br>57<br>44<br>11<br>02       | 0.0<br>46<br>68<br>59<br>63      | 0.9<br>92<br>87<br>80<br>88 | d_<br>_B<br>act<br>eri<br>a | p__Fi<br>rmicu<br>tes_A     | c__Clo<br>stridia      | o__Os<br>cillospi<br>rales | f__Oscil<br>lospirac<br>eae | g__CAG-<br>170                | s__CAG-170<br>unknown_9                 |
| MGYG-HGUT-03665:s__CAG-611<br>unknown_3                 | 0.7<br>09<br>89<br>15<br>31       | -<br>0.1<br>03<br>23<br>16<br>22 | 0.9<br>79<br>45<br>84<br>75 | d_<br>_B<br>act<br>eri<br>a | p__Fi<br>rmicu<br>tes       | c__Ba<br>cilli         | o__RF<br>39                | f__CAG-<br>611              | g__CAG-<br>611                | s__CAG-611<br>unknown_3                 |
| MGYG-HGUT-03668:s__UBA177<br>7 unknown_9                | 0.8<br>30<br>55<br>43<br>88       | -<br>0.0<br>59<br>89<br>16<br>36 | 0.9<br>92<br>22<br>01<br>9  | d_<br>_B<br>act<br>eri<br>a | p__Fi<br>rmicu<br>tes_A     | c__Clo<br>stridia      | o__Os<br>cillospi<br>rales | f__Oscil<br>lospirac<br>eae | g__UBA17<br>77                | s__UBA1777<br>unknown_9                 |
| MGYG-HGUT-03669:s__CAG-508<br>unknown<br>unknown_18     | 0.4<br>50<br>35<br>19<br>73       | 0.2<br>11<br>01<br>94<br>1       | 0.9<br>61<br>29<br>22<br>08 | d_<br>_B<br>act<br>eri<br>a | p__Fi<br>rmicu<br>tes_A     | c__Clo<br>stridia      | o__TA<br>NB77              | f__CAG-<br>508              | g__CAG-<br>508<br>unknown     | s__CAG-508<br>unknown<br>unknown_18     |
| MGYG-HGUT-03673:s__Gemmiger<br>unknown_12               | 0.1<br>01<br>48<br>62<br>32       | 0.4<br>43<br>53<br>20<br>98      | 0.8<br>83<br>30<br>72<br>56 | d_<br>_B<br>act<br>eri<br>a | p__Fi<br>rmicu<br>tes_A     | c__Clo<br>stridia      | o__Os<br>cillospi<br>rales | f__Rumi<br>nococca<br>ceae  | g__Gemmi<br>ger               | s__Gemmiger<br>unknown_12               |
| MGYG-HGUT-03674:s__Prevotella<br>massilia<br>unknown_13 | 0.1<br>98<br>38<br>91<br>8        | 0.3<br>58<br>15<br>15<br>33      | 0.8<br>91<br>82<br>55<br>59 | d_<br>_B<br>act<br>eri<br>a | p__B<br>acter<br>oidot<br>a | c__Ba<br>cteroi<br>dia | o__Bac<br>teroida<br>les   | f__Bact<br>eroidac<br>eae   | g__Prevot<br>ellamassili<br>a | s__Prevotella<br>massilia<br>unknown_13 |
| MGYG-HGUT-03675:s__Faecalib<br>acterium<br>unknown_14   | 0.1<br>79<br>03<br>88<br>88<br>32 | 0.3<br>72<br>88<br>40<br>43      | 0.8<br>91<br>82<br>55<br>59 | d_<br>_B<br>act<br>eri<br>a | p__Fi<br>rmicu<br>tes_A     | c__Clo<br>stridia      | o__Os<br>cillospi<br>rales | f__Rumi<br>nococca<br>ceae  | g__Faecali<br>bacterium       | s__Faecalibac<br>terium<br>unknown_14   |

|                                                      |             |              |             |             |                     |                   |                     |                       |                      |                                      |
|------------------------------------------------------|-------------|--------------|-------------|-------------|---------------------|-------------------|---------------------|-----------------------|----------------------|--------------------------------------|
| MGYG-HGUT-03676:s__Fusicatenu bacter unknown_2       | 0.1051394   | 0.419048072  | 0.883307256 | d__Bacteria | p__Firmicutes_A     | c__Clostridia     | o__Lachnospirales   | f__Lachnospiraceae    | g__Fusicatenu bacter | s__Fusicatenu bacter unknown_2       |
| MGYG-HGUT-03678:s__CAG-95 unknown_4                  | 0.100582173 | 0.457722954  | 0.883307256 | d__Bacteria | p__Firmicutes_A     | c__Clostridia     | o__Lachnospirales   | f__Lachnospiraceae    | g__CAG-95            | s__CAG-95 unknown_4                  |
| MGYG-HGUT-03680:s__Prevotella sp000433175            | 0.735180363 | -0.094431824 | 0.979458475 | d__Bacteria | p__Bacteroidota     | c__Bacteroidia    | o__Bacteroidales    | f__Bacteroidaceae     | g__Prevotella        | s__Prevotella sp000433175            |
| MGYG-HGUT-03681:s__Bacteroides stercoris             | 0.37444537  | 0.249089227  | 0.93970925  | d__Bacteria | p__Bacteroidota     | c__Bacteroidia    | o__Bacteroidales    | f__Bacteroidaceae     | g__Bacteroides       | s__Bacteroides stercoris             |
| MGYG-HGUT-03682:s__Ruthenibacterium lactatiformans   | 0.162267068 | -0.303836420 | 0.891825559 | d__Bacteria | p__Firmicutes_A     | c__Clostridia     | o__Oscillospirales  | f__Ruminococcaceae    | g__Ruthenibacterium  | s__Ruthenibacterium lactatiformans   |
| MGYG-HGUT-03683:s__Bifidobacterium pseudocatenulatum | 0.277511194 | 0.290099258  | 0.929025913 | d__Bacteria | p__Actinobacteriota | c__Actinobacteria | o__Actinomycetales  | f__Bifidobacteriaceae | g__Bifidobacterium   | s__Bifidobacterium pseudocatenulatum |
| MGYG-HGUT-03684:s__Eisenbergiella massiliensis       | 0.303431483 | -0.276546665 | 0.929025913 | d__Bacteria | p__Firmicutes_A     | c__Clostridia     | o__Lachnospirales   | f__Lachnospiraceae    | g__Eisenbergiella    | s__Eisenbergiella massiliensis       |
| MGYG-HGUT-03686:s__ER4 sp000765235                   | 0.155753887 | 0.387022285  | 0.891825559 | d__Bacteria | p__Firmicutes_A     | c__Clostridia     | o__Oscillospirales  | f__Oscillospiraceae   | g__ER4               | s__ER4 sp000765235                   |
| MGYG-HGUT-03688:s__Collinsella unknown_377           | 0.497773458 | 0.190174422  | 0.968532073 | d__Bacteria | p__Actinobacteriota | c__Coriobacteriia | o__Coriobacteriales | f__Coriobacteriaceae  | g__Collinsella       | s__Collinsella unknown_377           |

|                                               |             |              |             |               |                     |                   |                       |                        |                     |                               |
|-----------------------------------------------|-------------|--------------|-------------|---------------|---------------------|-------------------|-----------------------|------------------------|---------------------|-------------------------------|
| MGYG-HGUT-03689:s__Faecalibacterium unknown_1 | 0.574773741 | -0.156710966 | 0.975671757 | d__Bacteriata | p__Firmicutes       | c__Bacteriia      | o__Erysipelotrichales | f__Erysipelotrichaceae | g__Faecalibacterium | s__Faecalibacterium unknown_1 |
| MGYG-HGUT-03691:s__Prevotella disiens         | 0.690290156 | -0.11754458  | 0.975768579 | d__Bacteriata | p__Bacteroidota     | c__Bacteriia      | o__Bacteroidales      | f__Bacteroidaceae      | g__Prevotella       | s__Prevotella disiens         |
| MGYG-HGUT-03692:s__Collinsella sp002232035_32 | 0.52699363  | -0.177661167 | 0.968532073 | d__Bacteriata | p__Actinobacteriota | c__Coriobacteriia | o__Coriobacteriales   | f__Coriobacteriaceae   | g__Collinsella      | s__Collinsella sp002232035_32 |
| MGYG-HGUT-03693:s__Bacteroides_A plebeius_A   | 0.249183313 | -0.322413858 | 0.902181367 | d__Bacteriata | p__Bacteroidota     | c__Bacteriia      | o__Bacteroidales      | f__Bacteroidaceae      | g__Bacteroides_A    | s__Bacteroides_A plebeius_A   |
| MGYG-HGUT-03694:s__Agathobacter faecis        | 0.02447046  | 0.619582782  | 0.768225834 | d__Bacteriata | p__Firmicutes_A     | c__Clostridia     | o__Lachnospirales     | f__Lachnospiraceae     | g__Agathobacter     | s__Agathobacter faecis        |
| MGYG-HGUT-03695:s__Ruminococcus_A sp003011855 | 0.40478177  | 0.232738868  | 0.93970925  | d__Bacteriata | p__Firmicutes_A     | c__Clostridia     | o__Lachnospirales     | f__Lachnospiraceae     | g__Ruminococcus_A   | s__Ruminococcus_A sp003011855 |
| MGYG-HGUT-03696:s__Collinsella sp002232035_33 | 0.468543434 | 0.196421061  | 0.968194079 | d__Bacteriata | p__Actinobacteriota | c__Coriobacteriia | o__Coriobacteriales   | f__Coriobacteriaceae   | g__Collinsella      | s__Collinsella sp002232035_33 |
| MGYG-HGUT-03697:s__Prevotella copri_A         | 0.965677198 | -0.011641781 | 0.994479474 | d__Bacteriata | p__Bacteroidota     | c__Bacteriia      | o__Bacteroidales      | f__Bacteroidaceae      | g__Prevotella       | s__Prevotella copri_A         |
| MGYG-HGUT-03698:s__Collinsella unknown_378    | 0.39725     | 0.23558      | 0.93970     | d__Bacteriata | p__Actinobacteriota | c__Coriobacteriia | o__Coriobacteriales   | f__Coriobacteriaceae   | g__Collinsella      | s__Collinsella unknown_378    |

|                                               |                             |                                  |                             |                             |                                 |                           |                                   |                                |                        |                                      |
|-----------------------------------------------|-----------------------------|----------------------------------|-----------------------------|-----------------------------|---------------------------------|---------------------------|-----------------------------------|--------------------------------|------------------------|--------------------------------------|
|                                               | 67<br>42                    | 18<br>99                         | 92<br>5                     | eri<br>a                    | bacte<br>riota                  |                           |                                   |                                |                        |                                      |
| MGYG-HGUT-03699:s__Holdemana unknown_3        | 0.9<br>02<br>48<br>50<br>44 | 0.0<br>33<br>96<br>10<br>69      | 0.9<br>94<br>47<br>94<br>74 | d_<br>_B<br>act<br>eri<br>a | p__Fi<br>rmicu<br>tes           | c__Ba<br>cilli            | o__Ery<br>sipelot<br>richale<br>s | f__Erysi<br>pelotric<br>haceae | g__Holde<br>manella    | s__Holdema<br>nella<br>unknown_3     |
| MGYG-HGUT-03700:s__Collinsella unknown_379    | 0.1<br>83<br>68<br>36<br>38 | 0.3<br>70<br>58<br>73<br>99      | 0.8<br>91<br>82<br>55<br>59 | d_<br>_B<br>act<br>eri<br>a | p__A<br>ctino<br>bacte<br>riota | c__Co<br>riobac<br>teriia | o__Cor<br>iobact<br>eriales       | f__Cori<br>obacteri<br>aceae   | g__Collins<br>ella     | s__Collinsella<br>unknown_37<br>9    |
| MGYG-HGUT-03701:s__Parabacteroides unknown_14 | 0.7<br>19<br>13<br>07<br>2  | -<br>0.1<br>00<br>30<br>46<br>76 | 0.9<br>79<br>45<br>84<br>75 | d_<br>_B<br>act<br>eri<br>a | p__B<br>acter<br>oidot<br>a     | c__Ba<br>cteroidi<br>a    | o__Bac<br>teroida<br>les          | f__Tann<br>erellace<br>ae      | g__Paraba<br>cteroides | s__Parabacte<br>roides<br>unknown_14 |
| MGYG-HGUT-03702:s__Eisenbergiella sp900066775 | 0.0<br>36<br>87<br>95<br>16 | 0.5<br>76<br>65<br>32<br>9       | 0.7<br>68<br>22<br>58<br>34 | d_<br>_B<br>act<br>eri<br>a | p__Fi<br>rmicu<br>tes_A         | c__Clo<br>stridia         | o__Lac<br>hnospi<br>rales         | f__Lach<br>nospirac<br>eae     | g__Eisenb<br>ergiella  | s__Eisenbergi<br>ella<br>sp900066775 |
| MGYG-HGUT-03703:s__Collinsella unknown_380    | 0.1<br>22<br>21<br>18<br>91 | 0.4<br>21<br>60<br>24<br>91      | 0.8<br>85<br>74<br>21<br>75 | d_<br>_B<br>act<br>eri<br>a | p__A<br>ctino<br>bacte<br>riota | c__Co<br>riobac<br>teriia | o__Cor<br>iobact<br>eriales       | f__Cori<br>obacteri<br>aceae   | g__Collins<br>ella     | s__Collinsella<br>unknown_38<br>0    |
| MGYG-HGUT-03706:s__An181 sp002160325          | 0.6<br>23<br>61<br>22<br>16 | 0.1<br>37<br>36<br>37<br>75      | 0.9<br>75<br>67<br>17<br>57 | d_<br>_B<br>act<br>eri<br>a | p__Fi<br>rmicu<br>tes_A         | c__Clo<br>stridia         | o__Lac<br>hnospi<br>rales         | f__Lach<br>nospirac<br>eae     | g__An181               | s__An181<br>sp002160325              |
| MGYG-HGUT-03709:s__Enterococcus_A devriesei   | 0.3<br>96<br>43<br>39<br>26 | -<br>0.2<br>33<br>17<br>60<br>44 | 0.9<br>39<br>70<br>92<br>5  | d_<br>_B<br>act<br>eri<br>a | p__Fi<br>rmicu<br>tes           | c__Ba<br>cilli            | o__Lac<br>tobacill<br>ales        | f__Ente<br>rococca<br>ceae     | g__Entero<br>coccus_A  | s__Enterococ<br>cus_A<br>devriesei   |
| MGYG-HGUT-03715:s__Faecalicatena unknown_13   | 0.0<br>91<br>57<br>41<br>98 | 0.4<br>60<br>96<br>36<br>31      | 0.8<br>83<br>30<br>72<br>56 | d_<br>_B<br>act<br>eri<br>a | p__Fi<br>rmicu<br>tes_A         | c__Clo<br>stridia         | o__Lac<br>hnospi<br>rales         | f__Lach<br>nospirac<br>eae     | g__Faecali<br>catena   | s__Faecalicat<br>ena<br>unknown_13   |
| MGYG-HGUT-03717:s__Streptococcus unknown_18   | 0.0<br>16<br>84             | 0.6<br>56<br>11                  | 0.7<br>68<br>22             | d_<br>_B<br>act             | p__Fi<br>rmicu<br>tes           | c__Ba<br>cilli            | o__Lac<br>tobacill<br>ales        | f__Stre<br>ptococc<br>aceae    | g__Strepto<br>coccus   | s__Streptococ<br>cus<br>unknown_18   |

|                                                          |                             |                                  |                             |                             |                             |                        |                                     |                                               |                                               |                                                         |
|----------------------------------------------------------|-----------------------------|----------------------------------|-----------------------------|-----------------------------|-----------------------------|------------------------|-------------------------------------|-----------------------------------------------|-----------------------------------------------|---------------------------------------------------------|
|                                                          | 92<br>86                    | 17<br>72                         | 58<br>34                    | eri<br>a                    |                             |                        |                                     |                                               |                                               |                                                         |
| MGYG-HGUT-03718:s__S5-A14a unknown_1                     | 0.2<br>49<br>29<br>98<br>13 | 0.3<br>22<br>16<br>42<br>15      | 0.9<br>02<br>18<br>13<br>67 | d_<br>_B<br>act<br>eri<br>a | p__Fi<br>rmicu<br>tes_A     | c__Clo<br>stridia      | o__Pe<br>ptostre<br>ptococ<br>cales | f__Anae<br>rorovac<br>aceae                   | g__S5-<br>A14a                                | s__S5-A14a<br>unknown_1                                 |
| MGYG-HGUT-03739:s__Streptococcus oralis_E                | 0.9<br>61<br>70<br>95<br>14 | -<br>0.0<br>13<br>38<br>24<br>73 | 0.9<br>94<br>47<br>94<br>74 | d_<br>_B<br>act<br>eri<br>a | p__Fi<br>rmicu<br>tes       | c__Ba<br>cilli         | o__Lac<br>tobacill<br>ales          | f__Stre<br>ptococc<br>aceae                   | g__Strepto<br>coccus                          | s__Streptococ<br>cus oralis_E                           |
| MGYG-HGUT-03741:s__Levyella massiliensis                 | 0.8<br>93<br>03<br>58<br>93 | -<br>0.0<br>37<br>56<br>39<br>25 | 0.9<br>94<br>47<br>94<br>74 | d_<br>_B<br>act<br>eri<br>a | p__Fi<br>rmicu<br>tes_A     | c__Clo<br>stridia      | o__Tis<br>sierella<br>les           | f__Helc<br>cocccac<br>eae                     | g__Levyell<br>a                               | s__Levyella<br>massiliensis                             |
| MGYG-HGUT-03752:s__CAG-180 unknown_7                     | 0.7<br>12<br>68<br>42<br>12 | 0.1<br>03<br>23<br>68<br>93      | 0.9<br>79<br>45<br>84<br>75 | d_<br>_B<br>act<br>eri<br>a | p__Fi<br>rmicu<br>tes_A     | c__Clo<br>stridia      | o__Os<br>cillospi<br>rales          | f__Acut<br>alibacte<br>raceae                 | g__CAG-<br>180                                | s__CAG-180<br>unknown_7                                 |
| MGYG-HGUT-03763:s__Prevotella unknown_52                 | 0.7<br>77<br>86<br>69<br>52 | 0.0<br>79<br>22<br>61<br>68      | 0.9<br>79<br>52<br>04<br>84 | d_<br>_B<br>act<br>eri<br>a | p__B<br>acter<br>oidot<br>a | c__Ba<br>cteroi<br>dia | o__Bac<br>teroida<br>les            | f__Bact<br>eroidac<br>eae                     | g__Prevot<br>ella                             | s__Prevotella<br>unknown_52                             |
| MGYG-HGUT-03765:s__Prevotella bergensis                  | 0.4<br>71<br>36<br>47<br>73 | 0.2<br>02<br>15<br>57<br>24      | 0.9<br>68<br>19<br>40<br>79 | d_<br>_B<br>act<br>eri<br>a | p__B<br>acter<br>oidot<br>a | c__Ba<br>cteroi<br>dia | o__Bac<br>teroida<br>les            | f__Bact<br>eroidac<br>eae                     | g__Prevot<br>ella                             | s__Prevotella<br>bergensis                              |
| MGYG-HGUT-03766:s__Mahellia unknown unknown unknown      | 0.6<br>54<br>37<br>38<br>02 | -<br>0.1<br>25<br>81<br>97<br>41 | 0.9<br>75<br>67<br>17<br>57 | d_<br>_B<br>act<br>eri<br>a | p__Fi<br>rmicu<br>tes_A     | c__M<br>ahellia        | o__Ma<br>hellia<br>unkno<br>wn      | f__Mah<br>ellia<br>unknow<br>n<br>unknow<br>n | g__Mahelli<br>a unknown<br>unknown<br>unknown | s__Mahellia<br>unknown<br>unknown<br>unknown<br>unknown |
| MGYG-HGUT-03768:s__Acutalibacteraceae unknown unknown_52 | 0.4<br>59<br>11<br>92<br>77 | -<br>0.2<br>07<br>61<br>95<br>36 | 0.9<br>65<br>57<br>46<br>92 | d_<br>_B<br>act<br>eri<br>a | p__Fi<br>rmicu<br>tes_A     | c__Clo<br>stridia      | o__Os<br>cillospi<br>rales          | f__Acut<br>alibacte<br>raceae                 | g__Acutali<br>bacteracea<br>e unknown         | s__Acutalibac<br>teraceae<br>unknown<br>unknown_52      |

|                                             |                             |                                        |                             |                             |                         |                   |                            |                             |                       |                                    |
|---------------------------------------------|-----------------------------|----------------------------------------|-----------------------------|-----------------------------|-------------------------|-------------------|----------------------------|-----------------------------|-----------------------|------------------------------------|
| MGYG-HGUT-03770:s__Flavonifractor unknown_4 | 0.8<br>53<br>62<br>50<br>75 | 0.0<br>49<br>70<br>58<br>02            | 0.9<br>92<br>87<br>80<br>88 | d_<br>_B<br>act<br>eri<br>a | p__Fi<br>rmicu<br>tes_A | c__Clo<br>stridia | o__Os<br>cillospi<br>rales | f__Oscil<br>lospirac<br>eae | g__Flavoni<br>fractor | s__Flavonifra<br>ctor<br>unknown_4 |
| MGYG-HGUT-03771:s__Blautia sp002161285      | 0.5<br>48<br>50<br>13<br>78 | -<br>0.1<br>68<br>53<br>20<br>73<br>23 | 0.9<br>68<br>53<br>20<br>73 | d_<br>_B<br>act<br>eri<br>a | p__Fi<br>rmicu<br>tes_A | c__Clo<br>stridia | o__Lac<br>hnospi<br>rales  | f__Lach<br>nospi<br>rales   | g__Blautia            | s__Blautia<br>sp002161285          |
| MGYG-HGUT-03778:s__Ezakiella unknown_3      | 0.8<br>85<br>26<br>83<br>08 | 0.0<br>40<br>07<br>62<br>27            | 0.9<br>94<br>47<br>94<br>74 | d_<br>_B<br>act<br>eri<br>a | p__Fi<br>rmicu<br>tes_A | c__Clo<br>stridia | o__Tis<br>sierella<br>les  | f__Ezaki<br>ellaceae        | g__Ezakiell<br>a      | s__Ezakiella<br>unknown_3          |
| MGYG-HGUT-03786:s__Stomatobaculum naviforme | 0.0<br>63<br>58<br>44<br>24 | 0.5<br>15<br>27<br>34<br>07            | 0.8<br>57<br>21<br>13<br>2  | d_<br>_B<br>act<br>eri<br>a | p__Fi<br>rmicu<br>tes_A | c__Clo<br>stridia | o__Lac<br>hnospi<br>rales  | f__Lach<br>nospi<br>rales   | g__Stomat<br>obaculum | s__Stomatob<br>aculum<br>naviforme |
| MGYG-HGUT-03797:s__Streptococcus unknown_19 | 0.8<br>05<br>42<br>73<br>48 | 0.0<br>69<br>15<br>19<br>94            | 0.9<br>87<br>14<br>23<br>02 | d_<br>_B<br>act<br>eri<br>a | p__Fi<br>rmicu<br>tes   | c__Ba<br>cilli    | o__Lac<br>tobacill<br>ales | f__Stre<br>ptococc<br>aceae | g__Strepto<br>coccus  | s__Streptococ<br>cus<br>unknown_19 |
| MGYG-HGUT-03820:s__UBA5446 unknown_9        | 0.5<br>27<br>93<br>47<br>5  | -<br>0.1<br>69<br>53<br>20<br>60<br>02 | 0.9<br>68<br>53<br>20<br>73 | d_<br>_B<br>act<br>eri<br>a | p__Fi<br>rmicu<br>tes_A | c__Clo<br>stridia | o__Os<br>cillospi<br>rales | f__Oscil<br>lospirac<br>eae | g__UBA54<br>46        | s__UBA5446<br>unknown_9            |
| MGYG-HGUT-03821:s__Blautia_A unknown_19     | 0.4<br>69<br>10<br>20<br>06 | 0.2<br>01<br>22<br>48<br>14            | 0.9<br>68<br>19<br>40<br>79 | d_<br>_B<br>act<br>eri<br>a | p__Fi<br>rmicu<br>tes_A | c__Clo<br>stridia | o__Lac<br>hnospi<br>rales  | f__Lach<br>nospi<br>rales   | g__Blautia<br>_A      | s__Blautia_A<br>unknown_19         |
| MGYG-HGUT-03822:s__Blautia_A unknown_20     | 0.4<br>34<br>29<br>25<br>82 | 0.2<br>19<br>44<br>99<br>37            | 0.9<br>50<br>80<br>65<br>94 | d_<br>_B<br>act<br>eri<br>a | p__Fi<br>rmicu<br>tes_A | c__Clo<br>stridia | o__Lac<br>hnospi<br>rales  | f__Lach<br>nospi<br>rales   | g__Blautia<br>_A      | s__Blautia_A<br>unknown_20         |
| MGYG-HGUT-03824:s__CAG-110 unknown_31       | 0.7<br>31<br>09<br>09<br>98 | 0.0<br>96<br>45<br>88<br>63            | 0.9<br>79<br>45<br>84<br>75 | d_<br>_B<br>act<br>eri<br>a | p__Fi<br>rmicu<br>tes_A | c__Clo<br>stridia | o__Os<br>cillospi<br>rales | f__Oscil<br>lospirac<br>eae | g__CAG-<br>110        | s__CAG-110<br>unknown_31           |

|                                                        |                             |                                  |                             |                             |                                 |                           |                             |                               |                                    |                                                  |
|--------------------------------------------------------|-----------------------------|----------------------------------|-----------------------------|-----------------------------|---------------------------------|---------------------------|-----------------------------|-------------------------------|------------------------------------|--------------------------------------------------|
| MGYG-HGUT-03825:s__UBA1777 unknown_10                  | 0.0<br>18<br>78<br>75<br>02 | 0.6<br>41<br>91<br>93<br>37      | 0.7<br>68<br>22<br>58<br>34 | d_<br>_B<br>act<br>eri<br>a | p__Fi<br>rmicu<br>tes_A         | c__Clo<br>stridia         | o__Os<br>cillospi<br>rales  | f__Oscil<br>lospirac<br>eae   | g__UBA17<br>77                     | s__UBA1777<br>unknown_10                         |
| MGYG-HGUT-03834:s__Eisenbergiella unknown_7            | 0.4<br>10<br>32<br>75<br>36 | 0.2<br>30<br>14<br>55<br>21      | 0.9<br>39<br>70<br>92<br>5  | d_<br>_B<br>act<br>eri<br>a | p__Fi<br>rmicu<br>tes_A         | c__Clo<br>stridia         | o__Lac<br>hnospi<br>rales   | f__Lach<br>nospi<br>rales     | g__Eisenb<br>ergiella              | s__Eisenbergi<br>ella<br>unknown_7               |
| MGYG-HGUT-03835:s__UBA7173_A sp001915385               | 0.1<br>43<br>98<br>13<br>96 | 0.4<br>03<br>36<br>14<br>9       | 0.8<br>91<br>82<br>55<br>59 | d_<br>_B<br>act<br>eri<br>a | p__B<br>acter<br>oidot<br>a     | c__Ba<br>cteroi<br>dia    | o__Bac<br>teroida<br>les    | f__Muri<br>baculac<br>eae     | g__UBA71<br>73_A                   | s__UBA7173_<br>A<br>sp001915385                  |
| MGYG-HGUT-03840:s__CAG-272 unknown unknown_23          | 0.0<br>00<br>86<br>69<br>69 | 0.9<br>02<br>81<br>51<br>95      | 0.6<br>48<br>12<br>43<br>72 | d_<br>_B<br>act<br>eri<br>a | p__Fi<br>rmicu<br>tes_A         | c__Clo<br>stridia         | o__Os<br>cillospi<br>rales  | f__CAG-<br>272                | g__CAG-<br>272<br>unknown          | s__CAG-272<br>unknown<br>unknown_23              |
| MGYG-HGUT-03844:s__Ruminiclostridium_E unknown_5       | 0.2<br>01<br>89<br>31<br>82 | 0.3<br>49<br>55<br>56<br>16      | 0.8<br>91<br>82<br>55<br>59 | d_<br>_B<br>act<br>eri<br>a | p__Fi<br>rmicu<br>tes_A         | c__Clo<br>stridia         | o__Os<br>cillospi<br>rales  | f__Rumi<br>nococca<br>ceae    | g__Rumini<br>clostridiu<br>m_E     | s__Ruminiclo<br>stridium_E<br>unknown_5          |
| MGYG-HGUT-03847:s__Collinsella aerofaciens_F_20        | 0.7<br>24<br>39<br>81<br>31 | 0.0<br>99<br>08<br>69<br>79      | 0.9<br>79<br>45<br>84<br>75 | d_<br>_B<br>act<br>eri<br>a | p__A<br>ctino<br>bacte<br>riota | c__Co<br>riobac<br>teriia | o__Cor<br>iobact<br>eriales | f__Cori<br>obacteri<br>aceae  | g__Collins<br>ella                 | s__Collinsella<br>aerofaciens_F<br>_20           |
| MGYG-HGUT-03850:s__Oscillospiraceae unknown unknown_20 | 0.1<br>86<br>51<br>95<br>47 | 0.3<br>69<br>31<br>06<br>68      | 0.8<br>91<br>82<br>55<br>59 | d_<br>_B<br>act<br>eri<br>a | p__Fi<br>rmicu<br>tes_A         | c__Clo<br>stridia         | o__Os<br>cillospi<br>rales  | f__Oscil<br>lospirac<br>eae   | g__Oscillo<br>spiraceae<br>unknown | s__Oscillospir<br>aceae<br>unknown<br>unknown_20 |
| MGYG-HGUT-03860:s__NK3B98 unknown_2                    | 0.8<br>38<br>30<br>36<br>64 | 0.0<br>55<br>36<br>27<br>29      | 0.9<br>92<br>87<br>80<br>88 | d_<br>_B<br>act<br>eri<br>a | p__Fi<br>rmicu<br>tes_A         | c__Clo<br>stridia         | o__Os<br>cillospi<br>rales  | f__Oscil<br>lospirac<br>eae   | g__NK3B9<br>8                      | s__NK3B98<br>unknown_2                           |
| MGYG-HGUT-03863:s__An200 unknown_3                     | 0.5<br>24<br>81<br>87<br>09 | -<br>0.1<br>76<br>15<br>87<br>14 | 0.9<br>68<br>53<br>20<br>73 | d_<br>_B<br>act<br>eri<br>a | p__Fi<br>rmicu<br>tes_A         | c__Clo<br>stridia         | o__Os<br>cillospi<br>rales  | f__Acut<br>alibacte<br>raceae | g__An200                           | s__An200<br>unknown_3                            |



|                                                 |             |              |             |             |                   |                    |                       |                        |                   |                                 |
|-------------------------------------------------|-------------|--------------|-------------|-------------|-------------------|--------------------|-----------------------|------------------------|-------------------|---------------------------------|
| MGYG-HGUT-03864:s__Collinsella aerofaciens_F_21 | 0.904103548 | -0.033741862 | 0.994479474 | d__Bacteria | p__Actinobacteria | c__Corynebacteriia | o__Corynebacteriales  | f__Corynebacteriaceae  | g__Collinsella    | s__Collinsella aerofaciens_F_21 |
| MGYG-HGUT-03866:s__Bacteroides unknown_13       | 0.91388522  | 0.030069442  | 0.994479474 | d__Bacteria | p__Bacteroidetes  | c__Bacteroidia     | o__Bacteroidales      | f__Bacteroidaceae      | g__Bacteroides    | s__Bacteroides unknown_13       |
| MGYG-HGUT-03872:s__Clostridium_A unknown        | 0.719545166 | 0.098104151  | 0.979458475 | d__Bacteria | p__Firmicutes_A   | c__Clostridia      | o__Oscillospirales    | f__Acetivibrionaceae   | g__Clostridium_A  | s__Clostridium_A unknown        |
| MGYG-HGUT-03873:s__Collinsella unknown_392      | 0.156942784 | 0.380038216  | 0.891825559 | d__Bacteria | p__Actinobacteria | c__Corynebacteriia | o__Corynebacteriales  | f__Corynebacteriaceae  | g__Collinsella    | s__Collinsella unknown_392      |
| MGYG-HGUT-03874:s__Merdibacter unknown_4        | 0.732539366 | -0.09492265  | 0.979458475 | d__Bacteria | p__Firmicutes     | c__Bacilli         | o__Erysipelotrichales | f__Erysipelotrichaceae | g__Merdibacter    | s__Merdibacter unknown_4        |
| MGYG-HGUT-03875:s__CAG-74 unknown unknown_21    | 0.888296756 | 0.038278101  | 0.994479474 | d__Bacteria | p__Firmicutes_A   | c__Clostridia      | o__Christensenellales | f__CAG-74              | g__CAG-74 unknown | s__CAG-74 unknown unknown_21    |
| MGYG-HGUT-03878:s__Prevotella oris              | 0.343148138 | 0.252331461  | 0.939709205 | d__Bacteria | p__Bacteroidetes  | c__Bacteroidia     | o__Bacteroidales      | f__Bacteroidaceae      | g__Prevotella     | s__Prevotella oris              |
| MGYG-HGUT-03884:s__CAG-110 unknown_32           | 0.079102573 | 0.476637082  | 0.877826247 | d__Bacteria | p__Firmicutes_A   | c__Clostridia      | o__Oscillospirales    | f__Oscillospiraceae    | g__CAG-110        | s__CAG-110 unknown_32           |
| MGYG-HGUT-03885:s__Collinsella unknown_393      | 0.18294301  | 0.362891313  | 0.891825559 | d__Bacteria | p__Actinobacteria | c__Corynebacteriia | o__Corynebacteriales  | f__Corynebacteriaceae  | g__Collinsella    | s__Collinsella unknown_393      |

|                                                          |                             |                                  |                             |                             |                                 |                           |                                     |                               |                                       |                                                    |
|----------------------------------------------------------|-----------------------------|----------------------------------|-----------------------------|-----------------------------|---------------------------------|---------------------------|-------------------------------------|-------------------------------|---------------------------------------|----------------------------------------------------|
| MGYG-HGUT-03886:s__CAG-1427 unknown_18                   | 0.9<br>36<br>17<br>54<br>42 | 0.0<br>22<br>52<br>27<br>13      | 0.9<br>94<br>47<br>94<br>74 | d_<br>_B<br>act<br>eri<br>a | p__A<br>ctino<br>bacte<br>riota | c__Co<br>riobac<br>teriia | o__Cor<br>iobact<br>eriales         | f__Egge<br>rthellac<br>eae    | g__CAG-<br>1427                       | s__CAG-1427<br>unknown_18                          |
| MGYG-HGUT-03887:s__Acutalibacteraceae unknown unknown_56 | 0.8<br>64<br>81<br>57<br>38 | 0.0<br>47<br>77<br>67<br>18      | 0.9<br>94<br>47<br>94<br>74 | d_<br>_B<br>act<br>eri<br>a | p__Fi<br>rmicu<br>tes_A         | c__Clo<br>stridia         | o__Os<br>cillospi<br>rales          | f__Acut<br>alibacte<br>raceae | g__Acutali<br>bacteracea<br>e unknown | s__Acutalibac<br>teraceae<br>unknown<br>unknown_56 |
| MGYG-HGUT-03891:s__UBA11524 sp000437595                  | 0.6<br>32<br>93<br>55<br>72 | 0.1<br>34<br>01<br>74<br>25      | 0.9<br>75<br>67<br>17<br>57 | d_<br>_B<br>act<br>eri<br>a | p__Fi<br>rmicu<br>tes_A         | c__Clo<br>stridia         | o__Chr<br>istense<br>nellale<br>s   | f__CAG-<br>74                 | g__UBA11<br>524                       | s__UBA11524<br>sp000437595                         |
| MGYG-HGUT-03892:s__Roseburia unknown_7                   | 0.5<br>10<br>96<br>05<br>22 | 0.1<br>82<br>12<br>86<br>77      | 0.9<br>68<br>53<br>20<br>73 | d_<br>_B<br>act<br>eri<br>a | p__Fi<br>rmicu<br>tes_A         | c__Clo<br>stridia         | o__Lac<br>hnospi<br>rales           | f__Lach<br>nospirac<br>eae    | g__Rosebu<br>ria                      | s__Roseburia<br>unknown_7                          |
| MGYG-HGUT-03893:s__Prevotella multisaccharivorax         | 0.9<br>04<br>42<br>29<br>28 | 0.0<br>33<br>31<br>67<br>59      | 0.9<br>94<br>47<br>94<br>74 | d_<br>_B<br>act<br>eri<br>a | p__B<br>acter<br>oidot<br>a     | c__Ba<br>cteroi<br>dia    | o__Bac<br>teroida<br>les            | f__Bact<br>eroidac<br>eae     | g__Prevot<br>ella                     | s__Prevotella<br>multisacchari<br>vorax            |
| MGYG-HGUT-03898:s__S5-A14a unknown_2                     | 0.0<br>33<br>32<br>86<br>51 | 0.5<br>68<br>86<br>87<br>61      | 0.7<br>68<br>22<br>58<br>34 | d_<br>_B<br>act<br>eri<br>a | p__Fi<br>rmicu<br>tes_A         | c__Clo<br>stridia         | o__Pe<br>ptostre<br>ptococ<br>cales | f__Anae<br>rorovac<br>aceae   | g__S5-<br>A14a                        | s__S5-A14a<br>unknown_2                            |
| MGYG-HGUT-03899:s__Faecalibacterium unknown_15           | 0.4<br>04<br>86<br>42<br>84 | 0.2<br>31<br>88<br>24<br>46      | 0.9<br>39<br>70<br>92<br>5  | d_<br>_B<br>act<br>eri<br>a | p__Fi<br>rmicu<br>tes_A         | c__Clo<br>stridia         | o__Os<br>cillospi<br>rales          | f__Rumi<br>nococca<br>ceae    | g__Faecali<br>bacterium               | s__Faecalibac<br>terium<br>unknown_15              |
| MGYG-HGUT-03900:s__Collinsella unknown_396               | 0.8<br>97<br>88<br>96<br>83 | -<br>0.0<br>35<br>27<br>09<br>95 | 0.9<br>94<br>47<br>94<br>74 | d_<br>_B<br>act<br>eri<br>a | p__A<br>ctino<br>bacte<br>riota | c__Co<br>riobac<br>teriia | o__Cor<br>iobact<br>eriales         | f__Cori<br>obacteri<br>aceae  | g__Collins<br>ella                    | s__Collinsella<br>unknown_39<br>6                  |
| MGYG-HGUT-03903:s__Lawsonibacter unknown_10              | 0.5<br>14<br>53<br>59<br>76 | -<br>0.1<br>77<br>36<br>93<br>67 | 0.9<br>68<br>53<br>20<br>73 | d_<br>_B<br>act<br>eri<br>a | p__Fi<br>rmicu<br>tes_A         | c__Clo<br>stridia         | o__Os<br>cillospi<br>rales          | f__Oscil<br>lospirac<br>eae   | g__Lawson<br>ibacter                  | s__Lawsoniba<br>cter<br>unknown_10                 |

|                                                  |             |              |             |             |                   |                   |                     |                      |                        |                                  |
|--------------------------------------------------|-------------|--------------|-------------|-------------|-------------------|-------------------|---------------------|----------------------|------------------------|----------------------------------|
| MGYG-HGUT-03906:s__Collinsella sp002232035_34    | 0.778151812 | 0.077155594  | 0.979520484 | d__Bacteria | p__Actinobacteria | c__Coriobacteriia | o__Coriobacteriales | f__Coriobacteriaceae | g__Collinsella         | s__Collinsella sp002232035_34    |
| MGYG-HGUT-03911:s__QAMM01 unknown_2              | 0.470418996 | -0.194870913 | 0.968194079 | d__Bacteria | p__Firmicutes_A   | c__Clostridia     | o__Oscillospirales  | f__Ruminococcaceae   | g__QAMM01              | s__QAMM01 unknown_2              |
| MGYG-HGUT-03912:s__Prevotella sp000435635        | 0.940963112 | -0.019477096 | 0.994479474 | d__Bacteria | p__Bacteroidota   | c__Bacteroidia    | o__Bacteroidales    | f__Bacteroidaceae    | g__Prevotella          | s__Prevotella sp000435635        |
| MGYG-HGUT-03920:s__Collinsella unknown_400       | 0.768954242 | 0.081473615  | 0.979520484 | d__Bacteria | p__Actinobacteria | c__Coriobacteriia | o__Coriobacteriales | f__Coriobacteriaceae | g__Collinsella         | s__Collinsella unknown_400       |
| MGYG-HGUT-03921:s__Gemmiger unknown_13           | 0.0158193   | 0.653784325  | 0.768225834 | d__Bacteria | p__Firmicutes_A   | c__Clostridia     | o__Oscillospirales  | f__Ruminococcaceae   | g__Gemmiger            | s__Gemmiger unknown_13           |
| MGYG-HGUT-03922:s__Bacteroides unknown_14        | 0.586224092 | 0.14913499   | 0.975671757 | d__Bacteria | p__Bacteroidota   | c__Bacteroidia    | o__Bacteroidales    | f__Bacteroidaceae    | g__Bacteroides         | s__Bacteroides unknown_14        |
| MGYG-HGUT-03923:s__Collinsella unknown_401       | 0.369758526 | 0.24920043   | 0.93970925  | d__Bacteria | p__Actinobacteria | c__Coriobacteriia | o__Coriobacteriales | f__Coriobacteriaceae | g__Collinsella         | s__Collinsella unknown_401       |
| MGYG-HGUT-03925:s__CAG-882 unknown_2             | 0.196692411 | 0.336752455  | 0.89182559  | d__Bacteria | p__Firmicutes_A   | c__Clostridia     | o__Lachnospirales   | f__Lachnospiraceae   | g__CAG-882             | s__CAG-882 unknown_2             |
| MGYG-HGUT-03927:s__Ruminiclostridium_E unknown_6 | 0.66450029  | 0.118459525  | 0.975671757 | d__Bacteria | p__Firmicutes_A   | c__Clostridia     | o__Oscillospirales  | f__Ruminococcaceae   | g__Ruminiclostridium_E | s__Ruminiclostridium_E unknown_6 |

|                                               |             |                |             |             |                   |                   |                     |                      |                    |                               |
|-----------------------------------------------|-------------|----------------|-------------|-------------|-------------------|-------------------|---------------------|----------------------|--------------------|-------------------------------|
| MGYG-HGUT-03928:s__Collinsella unknown_402    | 0.402188797 | 0.226019634    | 0.93970925  | d__Bacteria | p__Actinobacteria | c__Coriobacteriia | o__Coriobacteriales | f__Coriobacteriaceae | g__Collinsella     | s__Collinsella unknown_402    |
| MGYG-HGUT-03929:s__CAG-590 unknown_4          | 0.478220079 | 0.196828706    | 0.968532073 | d__Bacteria | p__Firmicutes_A   | c__Clostridia     | o__Lachnospirales   | f__Lachnospiraceae   | g__CAG-590         | s__CAG-590 unknown_4          |
| MGYG-HGUT-03932:s__CAG-964 sp000435335        | 0.843165896 | 0.055516975    | 0.992878088 | d__Bacteria | p__Firmicutes_A   | c__Clostridia     | o__Oscillospirales  | f__Acetivibrionaceae | g__CAG-964         | s__CAG-964 sp000435335        |
| MGYG-HGUT-03937:s__Gemmiger sp003476825       | 0.075602343 | 0.490525736    | 0.877826247 | d__Bacteria | p__Firmicutes_A   | c__Clostridia     | o__Oscillospirales  | f__Ruminococcaceae   | g__Gemmiger        | s__Gemmiger sp003476825       |
| MGYG-HGUT-03940:s__CAG-302 sp000431795        | 0.366755606 | 0.249116621    | 0.93970925  | d__Bacteria | p__Firmicutes     | c__Bacilli        | o__RF39             | f__CAG-302           | g__CAG-302         | s__CAG-302 sp000431795        |
| MGYG-HGUT-03949:s__Eubacterium_F unknown_2    | 0.584591497 | -0.15004439    | 0.975671757 | d__Bacteria | p__Firmicutes_A   | c__Clostridia     | o__Lachnospirales   | f__Lachnospiraceae   | g__Eubacterium_F   | s__Eubacterium_F unknown_2    |
| MGYG-HGUT-03950:s__NK3B98 unknown_3           | 0.598742142 | 0.144884996    | 0.975671757 | d__Bacteria | p__Firmicutes_A   | c__Clostridia     | o__Oscillospirales  | f__Oscillospiraceae  | g__NK3B98          | s__NK3B98 unknown_3           |
| MGYG-HGUT-03954:s__CAG-303 unknown            | 0.795130028 | -0.07296638891 | 0.9829663   | d__Bacteria | p__Firmicutes_A   | c__Clostridia     | o__Lachnospirales   | f__Lachnospiraceae   | g__CAG-303         | s__CAG-303 unknown            |
| MGYG-HGUT-03957:s__Parabacteroides unknown_15 | 0.824755714 | -0.062260349   | 0.991148931 | d__Bacteria | p__Bacteroidetes  | c__Bacteroidia    | o__Bacteroidales    | f__Tannerellaceae    | g__Parabacteroides | s__Parabacteroides unknown_15 |

|                                                        |                             |                                  |                             |                             |                         |                   |                                     |                             |                                    |                                                  |
|--------------------------------------------------------|-----------------------------|----------------------------------|-----------------------------|-----------------------------|-------------------------|-------------------|-------------------------------------|-----------------------------|------------------------------------|--------------------------------------------------|
| MGYG-HGUT-03963:s__CAG-272 unknown unknown_25          | 0.8<br>10<br>27<br>23<br>16 | -<br>0.0<br>65<br>84<br>88<br>83 | 0.9<br>87<br>14<br>23<br>02 | d_<br>_B<br>act<br>eri<br>a | p__Fi<br>rmicu<br>tes_A | c__Clo<br>stridia | o__Os<br>cillospi<br>rales          | f__CAG-<br>272              | g__CAG-<br>272<br>unknown          | s__CAG-272<br>unknown<br>unknown_25              |
| MGYG-HGUT-03966:s__UBA11512 sp003522145                | 0.3<br>26<br>50<br>86<br>03 | -<br>0.2<br>70<br>22<br>65<br>02 | 0.9<br>30<br>62<br>46<br>92 | d_<br>_B<br>act<br>eri<br>a | p__Fi<br>rmicu<br>tes_A | c__Clo<br>stridia | o__Os<br>cillospi<br>rales          | f__CAG-<br>272              | g__UBA11<br>512                    | s__UBA11512<br>sp003522145                       |
| MGYG-HGUT-03967:s__QALW01 unknown unknown_5            | 0.2<br>34<br>71<br>86<br>1  | 0.3<br>19<br>47<br>48<br>58      | 0.9<br>02<br>18<br>13<br>67 | d_<br>_B<br>act<br>eri<br>a | p__Fi<br>rmicu<br>tes_A | c__Clo<br>stridia | o__Chr<br>istense<br>nellale<br>s   | f__QAL<br>W01               | g__QALW<br>01<br>unknown           | s__QALW01<br>unknown<br>unknown_5                |
| MGYG-HGUT-03970:s__Lachnospiraceae unknown unknown_36  | 0.1<br>11<br>60<br>75<br>66 | 0.4<br>37<br>05<br>31<br>08      | 0.8<br>83<br>30<br>72<br>56 | d_<br>_B<br>act<br>eri<br>a | p__Fi<br>rmicu<br>tes_A | c__Clo<br>stridia | o__Lac<br>hnospi<br>rales           | f__Lach<br>nospirac<br>eae  | g__Lachno<br>spiraceae<br>unknown  | s__Lachnospir<br>aceae<br>unknown<br>unknown_36  |
| MGYG-HGUT-03971:s__Mogibacterium sp002299625           | 0.3<br>11<br>19<br>12<br>02 | 0.2<br>83<br>90<br>87<br>74      | 0.9<br>29<br>02<br>59<br>13 | d_<br>_B<br>act<br>eri<br>a | p__Fi<br>rmicu<br>tes_A | c__Clo<br>stridia | o__Pe<br>ptostre<br>ptococ<br>cales | f__Anae<br>rorovac<br>eae   | g__Mogib<br>acterium               | s__Mogibacte<br>rium<br>sp002299625              |
| MGYG-HGUT-03975:s__UBA9475 unknown_3                   | 0.6<br>79<br>94<br>64<br>67 | 0.1<br>12<br>84<br>16<br>91      | 0.9<br>75<br>67<br>17<br>57 | d_<br>_B<br>act<br>eri<br>a | p__Fi<br>rmicu<br>tes_A | c__Clo<br>stridia | o__Os<br>cillospi<br>rales          | f__Oscil<br>lospirac<br>eae | g__UBA94<br>75                     | s__UBA9475<br>unknown_3                          |
| MGYG-HGUT-03978:s__UBA1777 unknown_13                  | 0.4<br>30<br>65<br>82<br>18 | 0.2<br>18<br>29<br>12<br>47      | 0.9<br>50<br>80<br>65<br>94 | d_<br>_B<br>act<br>eri<br>a | p__Fi<br>rmicu<br>tes_A | c__Clo<br>stridia | o__Os<br>cillospi<br>rales          | f__Oscil<br>lospirac<br>eae | g__UBA17<br>77                     | s__UBA1777<br>unknown_13                         |
| MGYG-HGUT-03980:s__Oscillospiraceae unknown unknown_21 | 0.0<br>98<br>43<br>34<br>77 | 0.4<br>28<br>74<br>42<br>92      | 0.8<br>83<br>30<br>72<br>56 | d_<br>_B<br>act<br>eri<br>a | p__Fi<br>rmicu<br>tes_A | c__Clo<br>stridia | o__Os<br>cillospi<br>rales          | f__Oscil<br>lospirac<br>eae | g__Oscillo<br>spiraceae<br>unknown | s__Oscillospir<br>aceae<br>unknown<br>unknown_21 |
| MGYG-HGUT-03984:s__Faecalicatena unknown_15            | 0.5<br>20<br>15<br>83<br>42 | 0.1<br>79<br>75<br>42<br>81      | 0.9<br>68<br>53<br>20<br>73 | d_<br>_B<br>act<br>eri<br>a | p__Fi<br>rmicu<br>tes_A | c__Clo<br>stridia | o__Lac<br>hnospi<br>rales           | f__Lach<br>nospirac<br>eae  | g__Faecali<br>catena               | s__Faecalicat<br>ena<br>unknown_15               |

|                                               |             |              |             |             |                     |                   |                     |                      |                   |                               |
|-----------------------------------------------|-------------|--------------|-------------|-------------|---------------------|-------------------|---------------------|----------------------|-------------------|-------------------------------|
| MGYG-HGUT-03987:s__UBA1691 unknown_4          | 0.078274404 | -0.469123038 | 0.877826247 | d__Bacteria | p__Firmicutes_A     | c__Clostridia     | o__Oscillospirales  | f__Acetivibrionaceae | g__UBA1691        | s__UBA1691 unknown_4          |
| MGYG-HGUT-03989:s__Alistipes sp002161445      | 0.194088424 | -0.36019598  | 0.891825559 | d__Bacteria | p__Bacteroidota     | c__Bacteroidia    | o__Bacteroidales    | f__Rikenellaceae     | g__Alistipes      | s__Alistipes sp002161445      |
| MGYG-HGUT-03990:s__Ruminococcus_E sp900314705 | 0.032951593 | -0.577610789 | 0.768225834 | d__Bacteria | p__Firmicutes_A     | c__Clostridia     | o__Oscillospirales  | f__Acetivibrionaceae | g__Ruminococcus_E | s__Ruminococcus_E sp900314705 |
| MGYG-HGUT-04003:s__Bacteroides unknown_15     | 0.68215344  | -0.114242433 | 0.975671757 | d__Bacteria | p__Bacteroidota     | c__Bacteroidia    | o__Bacteroidales    | f__Bacteroidaceae    | g__Bacteroides    | s__Bacteroides unknown_15     |
| MGYG-HGUT-04004:s__CAG-83 unknown_13          | 0.126742711 | 0.405393152  | 0.89182559  | d__Bacteria | p__Firmicutes_A     | c__Clostridia     | o__Oscillospirales  | f__Oscillospiraceae  | g__CAG-83         | s__CAG-83 unknown_13          |
| MGYG-HGUT-04005:s__CAG-354 unknown_6          | 0.948869478 | 0.017235178  | 0.994479474 | d__Bacteria | p__Firmicutes_A     | c__Clostridia     | o__TANB77           | f__CAG-508           | g__CAG-354        | s__CAG-354 unknown_6          |
| MGYG-HGUT-04006:s__Alistipes sp000434235      | 0.511883246 | 0.183836945  | 0.968532073 | d__Bacteria | p__Bacteroidota     | c__Bacteroidia    | o__Bacteroidales    | f__Rikenellaceae     | g__Alistipes      | s__Alistipes sp000434235      |
| MGYG-HGUT-04011:s__Collinsella unknown_406    | 0.318975078 | 0.277579436  | 0.929025913 | d__Bacteria | p__Actinobacteriota | c__Coriobacteriia | o__Coriobacteriales | f__Coriobacteriaceae | g__Collinsella    | s__Collinsella unknown_406    |
| MGYG-HGUT-04015:s__FJAT-21963 unknown         | 0.77737     | 0.07946      | 0.97952     | d__Bacteria | p__Firmicutes       | c__Bacilli        | o__Bacillales_A     | f__Planococcaceae    | g__FJAT-21963     | s__FJAT-21963 unknown         |

|                                                       |                             |                                 |                             |                             |                                 |                           |                                     |                             |                                   |                                                 |
|-------------------------------------------------------|-----------------------------|---------------------------------|-----------------------------|-----------------------------|---------------------------------|---------------------------|-------------------------------------|-----------------------------|-----------------------------------|-------------------------------------------------|
|                                                       | 33<br>32                    | 55<br>58                        | 04<br>84                    | eri<br>a                    |                                 |                           |                                     |                             |                                   |                                                 |
| MGYG-HGUT-04016:s__UBA1191 unknown_6                  | 0.5<br>28<br>60<br>31<br>66 | 0.1<br>72<br>39<br>69<br>21     | 0.9<br>68<br>53<br>20<br>73 | d_<br>_B<br>act<br>eri<br>a | p__Fi<br>rmicu<br>tes_A         | c__Clo<br>stridia         | o__Pe<br>ptostre<br>ptococ<br>cales | f__Anae<br>rovorac<br>aceae | g__UBA11<br>91                    | s__UBA1191<br>unknown_6                         |
| MGYG-HGUT-04017:s__CAG-74 unknown unknown_22          | 0.9<br>09<br>75<br>15<br>97 | 0.0<br>31<br>12<br>41<br>54     | 0.9<br>94<br>47<br>94<br>74 | d_<br>_B<br>act<br>eri<br>a | p__Fi<br>rmicu<br>tes_A         | c__Clo<br>stridia         | o__Chr<br>istense<br>nellale<br>s   | f__CAG-<br>74               | g__CAG-<br>74<br>unknown          | s__CAG-74<br>unknown<br>unknown_22              |
| MGYG-HGUT-04019:s__Bacteroides massiliensis           | 0.5<br>52<br>74<br>86<br>12 | 0.1<br>66<br>55<br>55<br>99     | 0.9<br>68<br>53<br>20<br>73 | d_<br>_B<br>act<br>eri<br>a | p__B<br>acter<br>oidot<br>a     | c__Ba<br>cteroi<br>dia    | o__Bac<br>teroida<br>les            | f__Bact<br>eroidac<br>eae   | g__Bacter<br>oides                | s__Bacteroi<br>des massiliensis                 |
| MGYG-HGUT-04022:s__Ruminococcaceae unknown unknown_24 | 0.4<br>15<br>95<br>99<br>83 | 0.2<br>25<br>98<br>41<br>29     | 0.9<br>39<br>70<br>92<br>5  | d_<br>_B<br>act<br>eri<br>a | p__Fi<br>rmicu<br>tes_A         | c__Clo<br>stridia         | o__Os<br>cillospi<br>rales          | f__Rumi<br>nococca<br>ceae  | g__Rumin<br>ococcace<br>e unknown | s__Ruminoco<br>ccaceae<br>unknown<br>unknown_24 |
| MGYG-HGUT-04028:s__CAG-83 unknown_14                  | 0.4<br>04<br>52<br>06<br>38 | 0.2<br>27<br>37<br>14<br>02     | 0.9<br>39<br>70<br>92<br>5  | d_<br>_B<br>act<br>eri<br>a | p__Fi<br>rmicu<br>tes_A         | c__Clo<br>stridia         | o__Os<br>cillospi<br>rales          | f__Oscil<br>lospirac<br>eae | g__CAG-<br>83                     | s__CAG-83<br>unknown_14                         |
| MGYG-HGUT-04035:s__CAG-272 unknown unknown_32         | 0.1<br>76<br>11<br>35<br>2  | 0.3<br>63<br>43<br>59<br>15     | 0.8<br>91<br>82<br>55<br>59 | d_<br>_B<br>act<br>eri<br>a | p__Fi<br>rmicu<br>tes_A         | c__Clo<br>stridia         | o__Os<br>cillospi<br>rales          | f__CAG-<br>272              | g__CAG-<br>272<br>unknown         | s__CAG-272<br>unknown<br>unknown_32             |
| MGYG-HGUT-04039:s__Lachnospiraceae unknown unknown_37 | 0.0<br>62<br>04<br>10<br>9  | 0.5<br>08<br>20<br>70<br>75     | 0.8<br>57<br>21<br>13<br>2  | d_<br>_B<br>act<br>eri<br>a | p__Fi<br>rmicu<br>tes_A         | c__Clo<br>stridia         | o__Lac<br>hnospi<br>rales           | f__Lach<br>nospirac<br>eae  | g__Lachno<br>spiraceae<br>unknown | s__Lachnospir<br>aceae<br>unknown<br>unknown_37 |
| MGYG-HGUT-04041:s__Eggerthellaceae unknown unknown_12 | 0.9<br>92<br>89<br>49<br>18 | -<br>0.0<br>02<br>46<br>87<br>8 | 0.9<br>98<br>80<br>33<br>46 | d_<br>_B<br>act<br>eri<br>a | p__A<br>ctino<br>bacte<br>riota | c__Co<br>riobac<br>teriia | o__Cor<br>iobact<br>eriales         | f__Egge<br>rthellac<br>eae  | g__Eggert<br>hellaceae<br>unknown | s__Eggerthell<br>aceae<br>unknown<br>unknown_12 |
| MGYG-HGUT-04044:s__CAG-74 unknown unknown_23          | 0.2<br>16<br>41<br>56<br>69 | 0.3<br>36<br>91<br>71<br>65     | 0.8<br>91<br>82<br>55<br>59 | d_<br>_B<br>act<br>eri<br>a | p__Fi<br>rmicu<br>tes_A         | c__Clo<br>stridia         | o__Chr<br>istense<br>nellale<br>s   | f__CAG-<br>74               | g__CAG-<br>74<br>unknown          | s__CAG-74<br>unknown<br>unknown_23              |

|                                                        |                             |                                   |                             |                             |                                 |                                        |                             |                              |                                    |                                                  |
|--------------------------------------------------------|-----------------------------|-----------------------------------|-----------------------------|-----------------------------|---------------------------------|----------------------------------------|-----------------------------|------------------------------|------------------------------------|--------------------------------------------------|
| MGYG-HGUT-04045:s__Lactobacillus unknown               | 0.5<br>13<br>22<br>40<br>56 | 0.1<br>79<br>69<br>11<br>48       | 0.9<br>68<br>53<br>20<br>73 | d_<br>_B<br>act<br>eri<br>a | p__Fi<br>rmicu<br>tes           | c__Ba<br>cilli                         | o__Lac<br>tobacill<br>ales  | f__Lact<br>obacilla<br>ceae  | g__Lactob<br>acillus               | s__Lactobacill<br>us unknown                     |
| MGYG-HGUT-04047:s__CAG-269 sp001916035                 | 0.6<br>97<br>24<br>98<br>97 | -<br>0.1<br>09<br>33<br>23<br>21  | 0.9<br>79<br>45<br>84<br>75 | d_<br>_B<br>act<br>eri<br>a | p__Fi<br>rmicu<br>tes_A         | c__Clo<br>stridia                      | o__TA<br>NB77               | f__CAG-<br>508               | g__CAG-<br>269                     | s__CAG-269<br>sp001916035                        |
| MGYG-HGUT-04055:s__Eubacterium_G unknown_3             | 0.5<br>47<br>39<br>33<br>35 | -<br>0.1<br>68<br>48<br>65<br>72  | 0.9<br>68<br>53<br>20<br>73 | d_<br>_B<br>act<br>eri<br>a | p__Fi<br>rmicu<br>tes_A         | c__Clo<br>stridia                      | o__Lac<br>hnospi<br>rales   | f__Lach<br>nospirac<br>eae   | g__Eubact<br>erium_G               | s__Eubacteriu<br>m_G<br>unknown_3                |
| MGYG-HGUT-04059:s__UBA1777 sp003150355                 | 0.3<br>53<br>22<br>81<br>34 | 0.2<br>51<br>13<br>35<br>52       | 0.9<br>39<br>70<br>92<br>5  | d_<br>_B<br>act<br>eri<br>a | p__Fi<br>rmicu<br>tes_A         | c__Clo<br>stridia                      | o__Os<br>cillospi<br>rales  | f__Oscil<br>lospirac<br>eae  | g__UBA17<br>77                     | s__UBA1777<br>sp003150355                        |
| MGYG-HGUT-04060:s__Collinsella unknown_410             | 0.3<br>07<br>41<br>87<br>96 | 0.2<br>83<br>06<br>02<br>59<br>04 | 0.9<br>29<br>02<br>59<br>13 | d_<br>_B<br>act<br>eri<br>a | p__A<br>ctino<br>bacte<br>riota | c__Co<br>riobac<br>teriia              | o__Cor<br>iobact<br>eriales | f__Cori<br>obacteri<br>aceae | g__Collins<br>ella                 | s__Collinsella<br>unknown_41<br>0                |
| MGYG-HGUT-04063:s__Oxalobacter unknown_4               | 0.7<br>82<br>88<br>36<br>61 | 0.0<br>76<br>62<br>60<br>41       | 0.9<br>81<br>07<br>51<br>07 | d_<br>_B<br>act<br>eri<br>a | p__Pr<br>oteob<br>acteri<br>a   | c__Ga<br>mmap<br>roteo<br>bacter<br>ia | o__Bur<br>kholde<br>riales  | f__Burk<br>holderia<br>ceae  | g__Oxalob<br>acter                 | s__Oxalobact<br>er<br>unknown_4                  |
| MGYG-HGUT-04066:s__Collinsella unknown_411             | 0.0<br>86<br>91<br>67<br>34 | 0.4<br>63<br>61<br>10<br>09       | 0.8<br>82<br>71<br>60<br>64 | d_<br>_B<br>act<br>eri<br>a | p__A<br>ctino<br>bacte<br>riota | c__Co<br>riobac<br>teriia              | o__Cor<br>iobact<br>eriales | f__Cori<br>obacteri<br>aceae | g__Collins<br>ella                 | s__Collinsella<br>unknown_41<br>1                |
| MGYG-HGUT-04071:s__CAG-83 unknown_15                   | 0.0<br>09<br>49<br>56<br>73 | 0.6<br>74<br>15<br>80<br>95       | 0.7<br>68<br>22<br>58<br>34 | d_<br>_B<br>act<br>eri<br>a | p__Fi<br>rmicu<br>tes_A         | c__Clo<br>stridia                      | o__Os<br>cillospi<br>rales  | f__Oscil<br>lospirac<br>eae  | g__CAG-<br>83                      | s__CAG-83<br>unknown_15                          |
| MGYG-HGUT-04074:s__Oscillospiraceae unknown unknown_22 | 0.2<br>46<br>01<br>11<br>04 | 0.2<br>97<br>37<br>07<br>62       | 0.9<br>02<br>18<br>13<br>67 | d_<br>_B<br>act<br>eri<br>a | p__Fi<br>rmicu<br>tes_A         | c__Clo<br>stridia                      | o__Os<br>cillospi<br>rales  | f__Oscil<br>lospirac<br>eae  | g__Oscillo<br>spiraceae<br>unknown | s__Oscillospir<br>aceae<br>unknown<br>unknown_22 |



|                                                         |                             |                                  |                             |                             |                                 |                           |                                   |                                                 |                                                 |                                                             |
|---------------------------------------------------------|-----------------------------|----------------------------------|-----------------------------|-----------------------------|---------------------------------|---------------------------|-----------------------------------|-------------------------------------------------|-------------------------------------------------|-------------------------------------------------------------|
| MGYG-HGUT-04078:s__CAG-273 unknown_3                    | 0.3<br>45<br>44<br>20<br>6  | 0.2<br>63<br>20<br>40<br>06      | 0.9<br>39<br>70<br>92<br>5  | d_<br>_B<br>act<br>eri<br>a | p__Fi<br>rmicu<br>tes_A         | c__Clo<br>stridia         | o__TA<br>NB77                     | f__CAG-<br>508                                  | g__CAG-<br>273                                  | s__CAG-273<br>unknown_3                                     |
| MGYG-HGUT-04079:s__Clostridia unknown unknown unknown_5 | 0.9<br>71<br>90<br>45<br>62 | -<br>0.0<br>09<br>87<br>24<br>35 | 0.9<br>94<br>72<br>70<br>63 | d_<br>_B<br>act<br>eri<br>a | p__Fi<br>rmicu<br>tes_A         | c__Clo<br>stridia         | o__Clo<br>stridia<br>unkno<br>wn  | f__Clost<br>ridia<br>unknow<br>n<br>unknow<br>n | g__Clostri<br>dia<br>unknow<br>n<br>unknow<br>n | s__Clostridia<br>unknown<br>unknown<br>unknown<br>unknown_5 |
| MGYG-HGUT-04082:s__Lachnospiraceae unknown unknown_38   | 0.2<br>83<br>33<br>77<br>31 | -<br>0.2<br>90<br>64<br>00<br>34 | 0.9<br>29<br>02<br>59<br>13 | d_<br>_B<br>act<br>eri<br>a | p__Fi<br>rmicu<br>tes_A         | c__Clo<br>stridia         | o__Lac<br>hnospi<br>rales         | f__Lach<br>nospirac<br>eae                      | g__Lachno<br>spiraceae<br>unknown               | s__Lachnospir<br>aceae<br>unknown<br>unknown_38             |
| MGYG-HGUT-04083:s__CAG-1427 sp000435675                 | 0.5<br>34<br>20<br>73<br>97 | 0.1<br>73<br>15<br>99<br>81      | 0.9<br>68<br>53<br>20<br>73 | d_<br>_B<br>act<br>eri<br>a | p__A<br>ctino<br>bacte<br>riota | c__Co<br>riobac<br>teriia | o__Cor<br>iobact<br>eriales       | f__Egge<br>rthellac<br>eae                      | g__CAG-<br>1427                                 | s__CAG-1427<br>sp000435675                                  |
| MGYG-HGUT-04087:s__Clostridium_M unknown_16             | 0.6<br>14<br>71<br>83<br>26 | -<br>0.1<br>36<br>86<br>44<br>85 | 0.9<br>75<br>67<br>17<br>57 | d_<br>_B<br>act<br>eri<br>a | p__Fi<br>rmicu<br>tes_A         | c__Clo<br>stridia         | o__Lac<br>hnospi<br>rales         | f__Lach<br>nospirac<br>eae                      | g__Clostri<br>dium_M                            | s__Clostridiu<br>m_M<br>unknown_16                          |
| MGYG-HGUT-04088:s__CAG-74 unknown unknown_25            | 0.3<br>50<br>86<br>93<br>46 | 0.2<br>54<br>62<br>28<br>12      | 0.9<br>39<br>70<br>92<br>5  | d_<br>_B<br>act<br>eri<br>a | p__Fi<br>rmicu<br>tes_A         | c__Clo<br>stridia         | o__Chr<br>istense<br>nellale<br>s | f__CAG-<br>74                                   | g__CAG-<br>74<br>unknown                        | s__CAG-74<br>unknown<br>unknown_25                          |
| MGYG-HGUT-04091:s__Collinsella unknown_413              | 0.6<br>85<br>67<br>62<br>27 | 0.1<br>10<br>87<br>42<br>31      | 0.9<br>75<br>76<br>85<br>79 | d_<br>_B<br>act<br>eri<br>a | p__A<br>ctino<br>bacte<br>riota | c__Co<br>riobac<br>teriia | o__Cor<br>iobact<br>eriales       | f__Cori<br>obacteri<br>aceae                    | g__Collins<br>ella                              | s__Collinsella<br>unknown_41<br>3                           |
| MGYG-HGUT-04092:s__CAG-83 unknown_16                    | 0.1<br>77<br>53<br>02<br>13 | 0.3<br>68<br>87<br>73<br>52      | 0.8<br>91<br>82<br>55<br>59 | d_<br>_B<br>act<br>eri<br>a | p__Fi<br>rmicu<br>tes_A         | c__Clo<br>stridia         | o__Os<br>cillospi<br>rales        | f__Oscil<br>lospirac<br>eae                     | g__CAG-<br>83                                   | s__CAG-83<br>unknown_16                                     |
| MGYG-HGUT-04093:s__UBA7185 unknown_4                    | 0.3<br>08<br>81<br>02<br>16 | 0.2<br>85<br>22<br>34<br>63      | 0.9<br>29<br>02<br>59<br>13 | d_<br>_B<br>act<br>eri<br>a | p__Fi<br>rmicu<br>tes_B         | c__Pe<br>ptoco<br>ccia    | o__Pe<br>ptococ<br>cales          | f__Pept<br>ococcac<br>eae                       | g__UBA71<br>85                                  | s__UBA7185<br>unknown_4                                     |

|                                                  |                             |                                  |                             |                             |                             |                        |                            |                               |                                       |                                                    |
|--------------------------------------------------|-----------------------------|----------------------------------|-----------------------------|-----------------------------|-----------------------------|------------------------|----------------------------|-------------------------------|---------------------------------------|----------------------------------------------------|
| MGYG-HGUT-04094:s__Bacteroides unknown_16        | 0.8<br>13<br>40<br>61<br>65 | 0.0<br>66<br>31<br>33<br>91      | 0.9<br>87<br>14<br>23<br>02 | d_<br>_B<br>act<br>eri<br>a | p__B<br>acter<br>oidot<br>a | c__Ba<br>cteroi<br>dia | o__Bac<br>teroida<br>les   | f__Bact<br>eroidac<br>eae     | g__Bacter<br>oides                    | s__Bacteroi<br>des<br>unknown_16                   |
| MGYG-HGUT-04104:s__Ruminococcaceae unknown_25    | 0.5<br>47<br>98<br>36<br>5  | 0.1<br>65<br>80<br>49<br>82      | 0.9<br>68<br>53<br>20<br>73 | d_<br>_B<br>act<br>eri<br>a | p__Fi<br>rmicu<br>tes_A     | c__Clo<br>stridia      | o__Os<br>cillospi<br>rales | f__Rumi<br>nococca<br>ceae    | g__Rumin<br>ococcea<br>e unknown      | s__Ruminoco<br>ccaceae<br>unknown<br>unknown_25    |
| MGYG-HGUT-04105:s__Alistipes_A unknown_3         | 0.6<br>22<br>26<br>34<br>91 | -<br>0.1<br>32<br>29<br>65<br>39 | 0.9<br>75<br>67<br>17<br>57 | d_<br>_B<br>act<br>eri<br>a | p__B<br>acter<br>oidot<br>a | c__Ba<br>cteroi<br>dia | o__Bac<br>teroida<br>les   | f__Rike<br>nellacea<br>e      | g__Alistipe<br>s_A                    | s__Alistipes_<br>A unknown_3                       |
| MGYG-HGUT-04111:s__Angelakisella unknown_3       | 0.2<br>52<br>00<br>75<br>79 | 0.3<br>16<br>60<br>04<br>16      | 0.9<br>02<br>18<br>13<br>67 | d_<br>_B<br>act<br>eri<br>a | p__Fi<br>rmicu<br>tes_A     | c__Clo<br>stridia      | o__Os<br>cillospi<br>rales | f__Rumi<br>nococca<br>ceae    | g__Angela<br>kisella                  | s__Angelakise<br>lla<br>unknown_3                  |
| MGYG-HGUT-04114:s__CAG-95 sp000438155            | 0.3<br>92<br>62<br>02<br>63 | 0.2<br>34<br>39<br>11<br>86      | 0.9<br>39<br>70<br>92<br>5  | d_<br>_B<br>act<br>eri<br>a | p__Fi<br>rmicu<br>tes_A     | c__Clo<br>stridia      | o__Lac<br>hnospi<br>rales  | f__Lach<br>nospi<br>rales     | g__CAG-<br>95                         | s__CAG-95<br>sp000438155                           |
| MGYG-HGUT-04115:s__Acutalibacteraceae unknown_65 | 0.2<br>21<br>11<br>88<br>31 | -<br>0.3<br>41<br>23<br>33<br>84 | 0.8<br>91<br>82<br>55<br>59 | d_<br>_B<br>act<br>eri<br>a | p__Fi<br>rmicu<br>tes_A     | c__Clo<br>stridia      | o__Os<br>cillospi<br>rales | f__Acut<br>alibacte<br>raceae | g__Acutali<br>bacteracea<br>e unknown | s__Acutalibac<br>teraceae<br>unknown<br>unknown_65 |
| MGYG-HGUT-04116:s__Acutalibacteraceae unknown_66 | 0.0<br>43<br>40<br>31<br>07 | -<br>0.5<br>30<br>33<br>87<br>77 | 0.7<br>79<br>32<br>10<br>52 | d_<br>_B<br>act<br>eri<br>a | p__Fi<br>rmicu<br>tes_A     | c__Clo<br>stridia      | o__Os<br>cillospi<br>rales | f__Acut<br>alibacte<br>raceae | g__Acutali<br>bacteracea<br>e unknown | s__Acutalibac<br>teraceae<br>unknown<br>unknown_66 |
| MGYG-HGUT-04117:s__CAG-302 sp001916775           | 0.7<br>60<br>18<br>69<br>61 | -<br>0.0<br>82<br>76<br>50<br>81 | 0.9<br>79<br>45<br>84<br>75 | d_<br>_B<br>act<br>eri<br>a | p__Fi<br>rmicu<br>tes       | c__Ba<br>cilli         | o__RF<br>39                | f__CAG-<br>302                | g__CAG-<br>302                        | s__CAG-302<br>sp001916775                          |
| MGYG-HGUT-04122:s__Butyricocccaceae unknown_5    | 0.8<br>30<br>20             | 0.0<br>59<br>78                  | 0.9<br>92<br>22             | d_<br>_B<br>act             | p__Fi<br>rmicu<br>tes_A     | c__Clo<br>stridia      | o__Os<br>cillospi<br>rales | f__Buty<br>ricicocc<br>aceae  | g__Butyric<br>icocceae<br>unknown     | s__Butyricico<br>ccaceae<br>unknown<br>unknown_5   |

|                                                       |                             |                                  |                             |                             |                         |                   |                                     |                             |                                        |                                                   |
|-------------------------------------------------------|-----------------------------|----------------------------------|-----------------------------|-----------------------------|-------------------------|-------------------|-------------------------------------|-----------------------------|----------------------------------------|---------------------------------------------------|
|                                                       | 20<br>93                    | 81<br>07                         | 01<br>9                     | eri<br>a                    |                         |                   |                                     |                             |                                        |                                                   |
| MGYG-HGUT-04123:s__Anaerovoracaceae unknown unknown_8 | 0.3<br>34<br>32<br>01<br>35 | -<br>0.2<br>69<br>78<br>08<br>1  | 0.9<br>30<br>62<br>46<br>92 | d_<br>_B<br>act<br>eri<br>a | p__Fi<br>rmicu<br>tes_A | c__Clo<br>stridia | o__Pe<br>ptostre<br>ptococ<br>cales | f__Ana<br>erovora<br>ceae   | g__Ana<br>erovora<br>ceae<br>e unknown | s__Ana<br>erovora<br>ceae<br>unknown<br>unknown_8 |
| MGYG-HGUT-04130:s__UBA1777 unknown_15                 | 0.8<br>26<br>42<br>49<br>78 | -<br>0.0<br>59<br>94<br>60<br>22 | 0.9<br>91<br>93<br>69<br>36 | d_<br>_B<br>act<br>eri<br>a | p__Fi<br>rmicu<br>tes_A | c__Clo<br>stridia | o__Os<br>cillospi<br>rales          | f__Oscil<br>lospirac<br>eae | g__UBA17<br>77                         | s__UBA1777<br>unknown_15                          |
| MGYG-HGUT-04132:s__Lachnospiraceae unknown unknown_39 | 0.9<br>06<br>42<br>85<br>45 | 0.0<br>32<br>66<br>41<br>03      | 0.9<br>94<br>47<br>94<br>74 | d_<br>_B<br>act<br>eri<br>a | p__Fi<br>rmicu<br>tes_A | c__Clo<br>stridia | o__Lac<br>hnospi<br>rales           | f__Lach<br>nospirac<br>eae  | g__Lachno<br>spiraceae<br>unknown      | s__Lachno<br>spiraceae<br>unknown<br>unknown_39   |
| MGYG-HGUT-04136:s__Eisenbergiella unknown_8           | 0.9<br>75<br>75<br>39<br>58 | 0.0<br>08<br>48<br>26<br>8       | 0.9<br>96<br>58<br>78<br>01 | d_<br>_B<br>act<br>eri<br>a | p__Fi<br>rmicu<br>tes_A | c__Clo<br>stridia | o__Lac<br>hnospi<br>rales           | f__Lach<br>nospirac<br>eae  | g__Eisenb<br>ergiella                  | s__Eisenb<br>ergiella<br>unknown_8                |
| MGYG-HGUT-04137:s__UBA738 sp003522945                 | 0.4<br>35<br>42<br>78<br>61 | 0.2<br>10<br>72<br>05<br>8       | 0.9<br>50<br>80<br>65<br>94 | d_<br>_B<br>act<br>eri<br>a | p__Fi<br>rmicu<br>tes_A | c__Clo<br>stridia | o__Os<br>cillospi<br>rales          | f__Oscil<br>lospirac<br>eae | g__UBA73<br>8                          | s__UBA738<br>sp003522945                          |
| MGYG-HGUT-04140:s__CAG-56 unknown_5                   | 0.9<br>44<br>57<br>01<br>85 | 0.0<br>19<br>27<br>57<br>42      | 0.9<br>94<br>47<br>94<br>74 | d_<br>_B<br>act<br>eri<br>a | p__Fi<br>rmicu<br>tes_A | c__Clo<br>stridia | o__Lac<br>hnospi<br>rales           | f__Lach<br>nospirac<br>eae  | g__CAG-<br>56                          | s__CAG-56<br>unknown_5                            |
| MGYG-HGUT-04142:s__Marseille-P3106 sp900169975        | 0.9<br>16<br>47<br>48<br>08 | -<br>0.0<br>28<br>64<br>48<br>07 | 0.9<br>94<br>47<br>94<br>74 | d_<br>_B<br>act<br>eri<br>a | p__Fi<br>rmicu<br>tes_A | c__Clo<br>stridia | o__Os<br>cillospi<br>rales          | f__Oscil<br>lospirac<br>eae | g__Marseil<br>le-P3106                 | s__Marseille-<br>P3106<br>sp900169975             |
| MGYG-HGUT-04143:s__Ruthenibacterium sp003149955       | 0.8<br>17<br>98<br>74<br>19 | -<br>0.0<br>64<br>22<br>40<br>63 | 0.9<br>87<br>66<br>45<br>39 | d_<br>_B<br>act<br>eri<br>a | p__Fi<br>rmicu<br>tes_A | c__Clo<br>stridia | o__Os<br>cillospi<br>rales          | f__Rumi<br>nococca<br>ceae  | g__Ruthen<br>ibacterium                | s__Rutheniba<br>cterium<br>sp003149955            |

|                                                       |                             |                                  |                             |             |                   |                   |                         |                         |                                 |                                            |
|-------------------------------------------------------|-----------------------------|----------------------------------|-----------------------------|-------------|-------------------|-------------------|-------------------------|-------------------------|---------------------------------|--------------------------------------------|
| MGYG-HGUT-04152:s__Collinsella unknown_416            | 0.3<br>51<br>55<br>92<br>27 | 0.2<br>51<br>19<br>65<br>64      | 0.9<br>39<br>70<br>92<br>5  | d__Bacteria | p__Actinobacteria | c__Coriobacteriia | o__Coriobacteriales     | f__Coriobacteriaceae    | g__Collinsella                  | s__Collinsella unknown_416                 |
| MGYG-HGUT-04153:s__UBA7102 unknown_2                  | 0.8<br>79<br>12<br>45<br>71 | -<br>0.0<br>41<br>84<br>62<br>25 | 0.9<br>94<br>47<br>94<br>74 | d__Bacteria | p__Firmicutes_A   | c__Clostridia     | o__Christensenellales   | f__UBA1750              | g__UBA7102                      | s__UBA7102 unknown_2                       |
| MGYG-HGUT-04157:s__Monoglobales unknown unknown_16    | 0.4<br>44<br>60<br>74<br>11 | 0.2<br>14<br>05<br>82<br>2       | 0.9<br>60<br>71<br>75<br>85 | d__Bacteria | p__Firmicutes_A   | c__Clostridia     | o__Monoglobales         | f__Monoglobales unknown | g__Monoglobales unknown unknown | s__Monoglobales unknown unknown unknown_16 |
| MGYG-HGUT-04158:s__Dialister invisus                  | 0.7<br>51<br>56<br>24<br>77 | -<br>0.0<br>88<br>29<br>84<br>21 | 0.9<br>79<br>45<br>84<br>75 | d__Bacteria | p__Firmicutes_C   | c__Negativicutes  | o__Veillonellales       | f__Dialisteraceae       | g__Dialister                    | s__Dialister invisus                       |
| MGYG-HGUT-04161:s__Collinsella unknown_418            | 0.0<br>41<br>65<br>76<br>72 | 0.5<br>55<br>94<br>47<br>65      | 0.7<br>79<br>32<br>10<br>52 | d__Bacteria | p__Actinobacteria | c__Coriobacteriia | o__Coriobacteriales     | f__Coriobacteriaceae    | g__Collinsella                  | s__Collinsella unknown_418                 |
| MGYG-HGUT-04163:s__Ruminiclostridium_C unknown_4      | 0.1<br>76<br>97<br>32<br>17 | 0.3<br>76<br>13<br>83<br>52      | 0.8<br>91<br>82<br>55<br>59 | d__Bacteria | p__Firmicutes_A   | c__Clostridia     | o__Oscillospirales      | f__Oscillospiraceae     | g__Ruminiclostridium_C          | s__Ruminiclostridium_C unknown_4           |
| MGYG-HGUT-04165:s__ER4 sp003522105                    | 0.2<br>03<br>37<br>81<br>07 | 0.3<br>41<br>38<br>67<br>27      | 0.8<br>91<br>82<br>55<br>59 | d__Bacteria | p__Firmicutes_A   | c__Clostridia     | o__Oscillospirales      | f__Oscillospiraceae     | g__ER4                          | s__ER4 sp003522105                         |
| MGYG-HGUT-04169:s__Lachnospiraceae unknown unknown_40 | 0.6<br>22<br>07<br>20<br>23 | -<br>0.1<br>37<br>83<br>77<br>22 | 0.9<br>75<br>67<br>17<br>57 | d__Bacteria | p__Firmicutes_A   | c__Clostridia     | o__Lachnospirales       | f__Lachnospiraceae      | g__Lachnospiraceae unknown      | s__Lachnospiraceae unknown unknown_40      |
| MGYG-HGUT-04171:s__Anaerovoracaceae unknown unknown_9 | 0.6<br>49<br>80<br>50<br>69 | -<br>0.1<br>24<br>57             | 0.9<br>75<br>67<br>17<br>57 | d__Bacteria | p__Firmicutes_A   | c__Clostridia     | o__Peptostreptococcales | f__Anaerovoracaceae     | g__Anaerovoracaceae unknown     | s__Anaerovoracaceae unknown unknown_9      |

|                                                      |                             |                                  |                             |                             |                                 |                           |                             |                               |                        |                                      |
|------------------------------------------------------|-----------------------------|----------------------------------|-----------------------------|-----------------------------|---------------------------------|---------------------------|-----------------------------|-------------------------------|------------------------|--------------------------------------|
|                                                      |                             | 30<br>18                         |                             |                             |                                 |                           |                             |                               |                        |                                      |
| MGYG-HGUT-04176:s__FJAT-27916<br>sp001183965         | 0.7<br>13<br>54<br>03<br>28 | 0.1<br>02<br>80<br>24<br>54      | 0.9<br>79<br>45<br>84<br>75 | d_<br>_B<br>act<br>eri<br>a | p__Fi<br>rmicu<br>tes           | c__Ba<br>cilli            | o__Bac<br>illales           | f__Bacill<br>aceae_A          | g__FJAT-<br>27916      | s__FJAT-<br>27916<br>sp001183965     |
| MGYG-HGUT-04180:s__Parabacteroi<br>des<br>unknown_16 | 0.8<br>50<br>44<br>46<br>28 | -<br>0.0<br>52<br>54<br>29<br>9  | 0.9<br>92<br>87<br>80<br>88 | d_<br>_B<br>act<br>eri<br>a | p__B<br>acter<br>oidot<br>a     | c__Ba<br>cteroi<br>dia    | o__Bac<br>teroida<br>les    | f__Tann<br>erellace<br>ae     | g__Paraba<br>cteroides | s__Parabacte<br>roides<br>unknown_16 |
| MGYG-HGUT-04181:s__Collinsella<br>sp002232035_35     | 0.2<br>42<br>85<br>88<br>61 | 0.3<br>14<br>89<br>81<br>94      | 0.9<br>02<br>18<br>13<br>67 | d_<br>_B<br>act<br>eri<br>a | p__A<br>ctino<br>bacte<br>riota | c__Co<br>riobac<br>teriia | o__Cor<br>iobact<br>eriales | f__Cori<br>obacteri<br>aceae  | g__Collins<br>ella     | s__Collinsella<br>sp002232035<br>_35 |
| MGYG-HGUT-04182:s__Bacteroides_A<br>unknown_14       | 0.3<br>12<br>65<br>78<br>12 | -<br>0.2<br>82<br>64<br>30<br>78 | 0.9<br>29<br>02<br>59<br>13 | d_<br>_B<br>act<br>eri<br>a | p__B<br>acter<br>oidot<br>a     | c__Ba<br>cteroi<br>dia    | o__Bac<br>teroida<br>les    | f__Bact<br>eroidac<br>eae     | g__Bacter<br>oides_A   | s__Bacteroides<br>_A<br>unknown_14   |
| MGYG-HGUT-04184:s__QANG01<br>unknown                 | 0.9<br>04<br>46<br>32<br>46 | 0.0<br>31<br>82<br>02<br>15      | 0.9<br>94<br>47<br>94<br>74 | d_<br>_B<br>act<br>eri<br>a | p__Fi<br>rmicu<br>tes_A         | c__Clo<br>stridia         | o__Os<br>cillospi<br>rales  | f__Rumi<br>nococca<br>ceae    | g__QANG0<br>1          | s__QANG01<br>unknown                 |
| MGYG-HGUT-04185:s__Bacteroides<br>unknown_17         | 0.6<br>21<br>73<br>25<br>75 | -<br>0.1<br>37<br>76<br>28<br>27 | 0.9<br>75<br>67<br>17<br>57 | d_<br>_B<br>act<br>eri<br>a | p__B<br>acter<br>oidot<br>a     | c__Ba<br>cteroi<br>dia    | o__Bac<br>teroida<br>les    | f__Bact<br>eroidac<br>eae     | g__Bacter<br>oides     | s__Bacteroides<br>_A<br>unknown_17   |
| MGYG-HGUT-04188:s__Bacteroides<br>unknown_18         | 0.5<br>21<br>85<br>36<br>21 | 0.1<br>79<br>57<br>57<br>57      | 0.9<br>68<br>53<br>20<br>73 | d_<br>_B<br>act<br>eri<br>a | p__B<br>acter<br>oidot<br>a     | c__Ba<br>cteroi<br>dia    | o__Bac<br>teroida<br>les    | f__Bact<br>eroidac<br>eae     | g__Bacter<br>oides     | s__Bacteroides<br>_A<br>unknown_18   |
| MGYG-HGUT-04194:s__UBA737<br>sp002431945             | 0.2<br>82<br>55<br>46<br>57 | 0.2<br>95<br>08<br>74<br>01      | 0.9<br>29<br>02<br>59<br>13 | d_<br>_B<br>act<br>eri<br>a | p__Fi<br>rmicu<br>tes_A         | c__Clo<br>stridia         | o__Os<br>cillospi<br>rales  | f__Acut<br>alibacte<br>raceae | g__UBA73<br>7          | s__UBA737<br>sp002431945             |
| MGYG-HGUT-04196:s__CAG-83<br>sp001916855             | 0.4<br>07<br>85             | 0.2<br>17<br>32                  | 0.9<br>39<br>70             | d_<br>_B<br>act             | p__Fi<br>rmicu<br>tes_A         | c__Clo<br>stridia         | o__Os<br>cillospi<br>rales  | f__Oscil<br>lospirac<br>eae   | g__CAG-<br>83          | s__CAG-83<br>sp001916855             |

|                                               |                             |                                  |                             |                             |                                 |                           |                             |                              |                           |                                    |
|-----------------------------------------------|-----------------------------|----------------------------------|-----------------------------|-----------------------------|---------------------------------|---------------------------|-----------------------------|------------------------------|---------------------------|------------------------------------|
|                                               | 09<br>28                    | 12<br>97                         | 92<br>5                     | eri<br>a                    |                                 |                           |                             |                              |                           |                                    |
| MGYG-HGUT-04200:s__F23-B02 sp000431075        | 0.6<br>45<br>56<br>52<br>81 | -<br>0.1<br>28<br>89<br>10<br>76 | 0.9<br>75<br>67<br>17<br>57 | d_<br>_B<br>act<br>eri<br>a | p__Fi<br>rmicu<br>tes_A         | c__Clo<br>stridia         | o__Os<br>cillospi<br>rales  | f__Oscil<br>lospirac<br>eae  | g__F23-<br>B02            | s__F23-B02<br>sp000431075          |
| MGYG-HGUT-04203:s__Acetatifa ctor unknown_8   | 0.5<br>13<br>62<br>11<br>37 | 0.1<br>82<br>27<br>30<br>25      | 0.9<br>68<br>53<br>20<br>73 | d_<br>_B<br>act<br>eri<br>a | p__Fi<br>rmicu<br>tes_A         | c__Clo<br>stridia         | o__Lac<br>hnospi<br>rales   | f__Lach<br>nospirac<br>eae   | g__Acetati<br>factor      | s__Acetatifa<br>ctor<br>unknown_8  |
| MGYG-HGUT-04206:s__ER4 unknown_5              | 0.2<br>15<br>27<br>12<br>53 | 0.3<br>39<br>72<br>10<br>06      | 0.8<br>91<br>82<br>55<br>59 | d_<br>_B<br>act<br>eri<br>a | p__Fi<br>rmicu<br>tes_A         | c__Clo<br>stridia         | o__Os<br>cillospi<br>rales  | f__Oscil<br>lospirac<br>eae  | g__ER4                    | s__ER4<br>unknown_5                |
| MGYG-HGUT-04207:s__UBA639 8 sp003150315       | 0.3<br>30<br>38<br>12<br>79 | 0.2<br>70<br>25<br>15<br>24      | 0.9<br>30<br>62<br>46<br>92 | d_<br>_B<br>act<br>eri<br>a | p__B<br>acter<br>oidot<br>a     | c__Ba<br>cteroi<br>dia    | o__Bac<br>teroida<br>les    | f__Bact<br>eroidac<br>eae    | g__UBA63<br>98            | s__UBA6398<br>sp003150315          |
| MGYG-HGUT-04209:s__Collinsella unknown_419    | 0.9<br>13<br>78<br>45<br>68 | -<br>0.0<br>28<br>94<br>14<br>75 | 0.9<br>94<br>47<br>94<br>74 | d_<br>_B<br>act<br>eri<br>a | p__A<br>ctino<br>bacte<br>riota | c__Co<br>riobac<br>teriia | o__Cor<br>iobact<br>eriales | f__Cori<br>obacteri<br>aceae | g__Collins<br>ella        | s__Collinsella<br>unknown_41<br>9  |
| MGYG-HGUT-04215:s__UBA123 4 unknown unknown_3 | 0.6<br>43<br>51<br>27<br>58 | -<br>0.1<br>29<br>25<br>58<br>01 | 0.9<br>75<br>67<br>17<br>57 | d_<br>_B<br>act<br>eri<br>a | p__Fi<br>rmicu<br>tes_A         | c__Clo<br>stridia         | o__TA<br>NB77               | f__UBA<br>1234               | g__UBA12<br>34<br>unknown | s__UBA1234<br>unknown<br>unknown_3 |
| MGYG-HGUT-04222:s__CAG-269 unknown_26         | 0.2<br>16<br>48<br>91<br>93 | -<br>0.3<br>44<br>71<br>33<br>3  | 0.8<br>91<br>82<br>55<br>59 | d_<br>_B<br>act<br>eri<br>a | p__Fi<br>rmicu<br>tes_A         | c__Clo<br>stridia         | o__TA<br>NB77               | f__CAG-<br>508               | g__CAG-<br>269            | s__CAG-269<br>unknown_26           |
| MGYG-HGUT-04231:s__CAG-382 unknown unknown_9  | 0.5<br>21<br>87<br>90<br>06 | -<br>0.1<br>74<br>22<br>48<br>19 | 0.9<br>68<br>53<br>20<br>73 | d_<br>_B<br>act<br>eri<br>a | p__Fi<br>rmicu<br>tes_A         | c__Clo<br>stridia         | o__Os<br>cillospi<br>rales  | f__CAG-<br>382               | g__CAG-<br>382<br>unknown | s__CAG-382<br>unknown<br>unknown_9 |

|                                                          |                             |                                  |                             |                             |                                 |                           |                                     |                                          |                                           |                                                    |
|----------------------------------------------------------|-----------------------------|----------------------------------|-----------------------------|-----------------------------|---------------------------------|---------------------------|-------------------------------------|------------------------------------------|-------------------------------------------|----------------------------------------------------|
| MGYG-HGUT-04232:s__Terrisporobacter unknown_2            | 0.1<br>75<br>76<br>36<br>72 | -<br>0.3<br>76<br>32<br>44<br>64 | 0.8<br>91<br>82<br>55<br>59 | d_<br>_B<br>act<br>eri<br>a | p__Fi<br>rmicu<br>tes_A         | c__Clo<br>stridia         | o__Pe<br>ptostre<br>ptococ<br>cales | f__Pept<br>ostrept<br>ococcae<br>eae     | g__Terrisp<br>orobacter                   | s__Terrisporo<br>bacter<br>unknown_2               |
| MGYG-HGUT-04233:s__Fusicat nibacter unknown_3            | 0.4<br>94<br>14<br>00<br>89 | 0.1<br>87<br>92<br>02<br>33      | 0.9<br>68<br>53<br>20<br>73 | d_<br>_B<br>act<br>eri<br>a | p__Fi<br>rmicu<br>tes_A         | c__Clo<br>stridia         | o__Lac<br>hnospi<br>rales           | f__Lach<br>nospirac<br>eae               | g__Fusicat<br>enibacter                   | s__Fusicatени<br>bacter<br>unknown_3               |
| MGYG-HGUT-04234:s__Massiliomicrobiota sp002160815        | 0.2<br>21<br>59<br>43<br>2  | -<br>0.3<br>39<br>64<br>66<br>12 | 0.8<br>91<br>82<br>55<br>59 | d_<br>_B<br>act<br>eri<br>a | p__Fi<br>rmicu<br>tes           | c__Ba<br>cilli            | o__Ery<br>sipelot<br>richale<br>s   | f__Erysi<br>pelatocl<br>ostridia<br>ceae | g__Massili<br>omicrobiot<br>a             | s__Massiliomi<br>crobiota<br>sp002160815           |
| MGYG-HGUT-04235:s__Christensenellaceae unknown unknown_5 | 0.2<br>16<br>60<br>11<br>45 | 0.3<br>36<br>41<br>64<br>61      | 0.8<br>91<br>82<br>55<br>59 | d_<br>_B<br>act<br>eri<br>a | p__Fi<br>rmicu<br>tes_A         | c__Clo<br>stridia         | o__Chr<br>istense<br>nellale<br>s   | f__Chris<br>tensene<br>llaceae           | g__Christe<br>nsenellace<br>ae<br>unknown | s__Christense<br>nellaceae<br>unknown<br>unknown_5 |
| MGYG-HGUT-04236:s__Acutalibacteraceae unknown unknown_71 | 0.6<br>86<br>48<br>04<br>26 | 0.1<br>13<br>14<br>83<br>27      | 0.9<br>75<br>76<br>85<br>79 | d_<br>_B<br>act<br>eri<br>a | p__Fi<br>rmicu<br>tes_A         | c__Clo<br>stridia         | o__Os<br>cillospi<br>rales          | f__Acut<br>alibacte<br>raceae            | g__Acutali<br>bacteracea<br>e unknown     | s__Acutalibac<br>teraceae<br>unknown<br>unknown_71 |
| MGYG-HGUT-04237:s__CAG-492 sp000434335                   | 0.6<br>36<br>60<br>07<br>39 | -<br>0.1<br>30<br>17<br>67<br>66 | 0.9<br>75<br>67<br>17<br>57 | d_<br>_B<br>act<br>eri<br>a | p__Fi<br>rmicu<br>tes_A         | c__Clo<br>stridia         | o__TA<br>NB77                       | f__CAG-<br>508                           | g__CAG-<br>492                            | s__CAG-492<br>sp000434335                          |
| MGYG-HGUT-04238:s__Senegali massilia unknown_5           | 0.7<br>82<br>06<br>53       | -<br>0.0<br>77<br>63<br>60<br>5  | 0.9<br>80<br>73<br>73<br>28 | d_<br>_B<br>act<br>eri<br>a | p__A<br>ctino<br>bacte<br>riota | c__Co<br>riobac<br>teriia | o__Cor<br>iobact<br>eriales         | f__Egge<br>rthellac<br>eae               | g__Senega<br>limassilia                   | s__Senegalim<br>assilia<br>unknown_5               |
| MGYG-HGUT-04245:s__CAG-138 unknown unknown_6             | 0.8<br>03<br>27<br>37<br>4  | 0.0<br>66<br>45<br>72<br>26      | 0.9<br>87<br>14<br>23<br>02 | d_<br>_B<br>act<br>eri<br>a | p__Fi<br>rmicu<br>tes_A         | c__Clo<br>stridia         | o__Chr<br>istense<br>nellale<br>s   | f__CAG-<br>138                           | g__CAG-<br>138<br>unknown                 | s__CAG-138<br>unknown<br>unknown_6                 |
| MGYG-HGUT-04248:s__CAG-170 sp000436735                   | 0.1<br>34<br>63             | 0.3<br>93<br>52                  | 0.8<br>91<br>82             | d_<br>_B<br>act             | p__Fi<br>rmicu<br>tes_A         | c__Clo<br>stridia         | o__Os<br>cillospi<br>rales          | f__Oscil<br>lospirac<br>eae              | g__CAG-<br>170                            | s__CAG-170<br>sp000436735                          |

|                                                               |                             |                                  |                             |                             |                                 |                           |                            |                               |                           |                                               |
|---------------------------------------------------------------|-----------------------------|----------------------------------|-----------------------------|-----------------------------|---------------------------------|---------------------------|----------------------------|-------------------------------|---------------------------|-----------------------------------------------|
|                                                               | 62<br>52                    | 21<br>38                         | 55<br>59                    | eri<br>a                    |                                 |                           |                            |                               |                           |                                               |
| MGYG-HGUT-04249:s__CAG-822<br>unknown<br>unknown_11           | 0.8<br>52<br>70<br>77<br>91 | 0.0<br>51<br>68<br>61<br>23      | 0.9<br>92<br>87<br>80<br>88 | d_<br>_B<br>act<br>eri<br>a | p__Fi<br>rmicu<br>tes           | c__Ba<br>cilli            | o__RF<br>39                | f__CAG-<br>822                | g__CAG-<br>822<br>unknown | s__CAG-822<br>unknown<br>unknown_11           |
| MGYG-HGUT-04250:s__Acetatifa<br>ctor sp003447295              | 0.0<br>69<br>46<br>90<br>98 | 0.4<br>80<br>75<br>86<br>23      | 0.8<br>77<br>82<br>62<br>47 | d_<br>_B<br>act<br>eri<br>a | p__Fi<br>rmicu<br>tes_A         | c__Clo<br>stridia         | o__Lac<br>hnospi<br>rales  | f__Lach<br>nospira<br>cae     | g__Acetati<br>factor      | s__Acetatifa<br>ctor<br>sp003447295           |
| MGYG-HGUT-04256:s__CAG-177<br>sp003538135                     | 0.8<br>76<br>30<br>14<br>17 | 0.0<br>42<br>80<br>56<br>35      | 0.9<br>94<br>47<br>94<br>74 | d_<br>_B<br>act<br>eri<br>a | p__Fi<br>rmicu<br>tes_A         | c__Clo<br>stridia         | o__Os<br>cillospi<br>rales | f__Acut<br>alibacte<br>raceae | g__CAG-<br>177            | s__CAG-177<br>sp003538135                     |
| MGYG-HGUT-04262:s__CAG-110<br>unknown_34                      | 0.4<br>82<br>02<br>48<br>86 | 0.1<br>91<br>92<br>94<br>34      | 0.9<br>68<br>53<br>20<br>73 | d_<br>_B<br>act<br>eri<br>a | p__Fi<br>rmicu<br>tes_A         | c__Clo<br>stridia         | o__Os<br>cillospi<br>rales | f__Oscil<br>lospirac<br>cae   | g__CAG-<br>110            | s__CAG-110<br>unknown_34                      |
| MGYG-HGUT-04265:s__UBA169<br>1 unknown_5                      | 0.1<br>03<br>56<br>57<br>86 | -<br>0.4<br>27<br>79<br>97<br>42 | 0.8<br>83<br>30<br>72<br>56 | d_<br>_B<br>act<br>eri<br>a | p__Fi<br>rmicu<br>tes_A         | c__Clo<br>stridia         | o__Os<br>cillospi<br>rales | f__Acut<br>alibacte<br>raceae | g__UBA16<br>91            | s__UBA1691<br>unknown_5                       |
| MGYG-HGUT-04266:s__Streptoc<br>occus unknown_20               | 0.2<br>04<br>67<br>79<br>14 | 0.3<br>37<br>59<br>99<br>72      | 0.8<br>91<br>82<br>55<br>59 | d_<br>_B<br>act<br>eri<br>a | p__Fi<br>rmicu<br>tes           | c__Ba<br>cilli            | o__Lac<br>tobacill<br>ales | f__Stre<br>ptococc<br>aceae   | g__Strepto<br>coccus      | s__Streptococ<br>cus<br>unknown_20            |
| MGYG-HGUT-04268:s__Pauljens<br>enia<br>bouchesdurhonens<br>is | 0.7<br>03<br>06<br>65<br>48 | -<br>0.1<br>06<br>52<br>02<br>2  | 0.9<br>79<br>45<br>84<br>75 | d_<br>_B<br>act<br>eri<br>a | p__A<br>ctino<br>bacte<br>riota | c__Ac<br>tinoba<br>cteria | o__Act<br>inomyc<br>etales | f__Actin<br>omycet<br>aceae   | g__Pauljen<br>senia       | s__Pauljense<br>nia<br>bouchesdurh<br>onensis |
| MGYG-HGUT-04269:s__Blautia_<br>A unknown_21                   | 0.9<br>94<br>49<br>28<br>78 | 0.0<br>01<br>91<br>74<br>9       | 0.9<br>98<br>80<br>33<br>46 | d_<br>_B<br>act<br>eri<br>a | p__Fi<br>rmicu<br>tes_A         | c__Clo<br>stridia         | o__Lac<br>hnospi<br>rales  | f__Lach<br>nospira<br>cae     | g__Blautia<br>_A          | s__Blautia_A<br>unknown_21                    |
| MGYG-HGUT-04271:s__Roseburi<br>a unknown_8                    | 0.3<br>17<br>47             | 0.2<br>60<br>10                  | 0.9<br>29<br>02             | d_<br>_B<br>act             | p__Fi<br>rmicu<br>tes_A         | c__Clo<br>stridia         | o__Lac<br>hnospi<br>rales  | f__Lach<br>nospira<br>cae     | g__Rosebu<br>ria          | s__Roseburia<br>unknown_8                     |



|                                               |                             |                                  |                             |                             |                                     |                               |                                 |                                    |                           |                                          |
|-----------------------------------------------|-----------------------------|----------------------------------|-----------------------------|-----------------------------|-------------------------------------|-------------------------------|---------------------------------|------------------------------------|---------------------------|------------------------------------------|
|                                               | 22<br>33                    | 47<br>44                         | 59<br>13                    | eri<br>a                    |                                     |                               |                                 |                                    |                           |                                          |
| MGYG-HGUT-04275:s__Ruminococcus_C sp000437175 | 0.5<br>71<br>61<br>22<br>88 | 0.1<br>57<br>85<br>67<br>14      | 0.9<br>74<br>68<br>62<br>21 | d_<br>_B<br>act<br>eri<br>a | p_<br>_Fi<br>rmicu<br>tes_A         | c_<br>_Clo<br>stridia         | o_<br>_Os<br>cillospi<br>rales  | f_<br>_Rumi<br>nococca<br>ceae     | g_<br>_Rumin<br>ococcus_C | s_<br>_Ruminoco<br>ccus_C<br>sp000437175 |
| MGYG-HGUT-04276:s__ER4 unknown_6              | 0.7<br>41<br>42<br>90<br>98 | 0.0<br>87<br>17<br>17<br>34      | 0.9<br>79<br>45<br>84<br>75 | d_<br>_B<br>act<br>eri<br>a | p_<br>_Fi<br>rmicu<br>tes_A         | c_<br>_Clo<br>stridia         | o_<br>_Os<br>cillospi<br>rales  | f_<br>_Oscil<br>lospirac<br>eae    | g_<br>_ER4                | s_<br>_ER4<br>unknown_6                  |
| MGYG-HGUT-04280:s__Collinsella unknown_424    | 0.0<br>38<br>04<br>92<br>09 | 0.5<br>59<br>68<br>27<br>4       | 0.7<br>68<br>22<br>58<br>34 | d_<br>_B<br>act<br>eri<br>a | p_<br>_A<br>ctino<br>bacte<br>riota | c_<br>_Co<br>riobac<br>teriia | o_<br>_Cor<br>iobact<br>eriales | f_<br>_Cori<br>obacteri<br>aceae   | g_<br>_Collins<br>ella    | s_<br>_Collinsella<br>unknown_42<br>4    |
| MGYG-HGUT-04282:s__Ruminococcus_D sp000434695 | 0.4<br>97<br>03<br>14<br>72 | -<br>0.1<br>72<br>27<br>39<br>98 | 0.9<br>68<br>53<br>20<br>73 | d_<br>_B<br>act<br>eri<br>a | p_<br>_Fi<br>rmicu<br>tes_A         | c_<br>_Clo<br>stridia         | o_<br>_Os<br>cillospi<br>rales  | f_<br>_Rumi<br>nococca<br>ceae     | g_<br>_Rumin<br>ococcus_D | s_<br>_Ruminoco<br>ccus_D<br>sp000434695 |
| MGYG-HGUT-04284:s__Collinsella unknown_425    | 0.1<br>08<br>72<br>20<br>29 | 0.4<br>32<br>09<br>98<br>55      | 0.8<br>83<br>30<br>72<br>56 | d_<br>_B<br>act<br>eri<br>a | p_<br>_A<br>ctino<br>bacte<br>riota | c_<br>_Co<br>riobac<br>teriia | o_<br>_Cor<br>iobact<br>eriales | f_<br>_Cori<br>obacteri<br>aceae   | g_<br>_Collins<br>ella    | s_<br>_Collinsella<br>unknown_42<br>5    |
| MGYG-HGUT-04286:s__Collinsella sp002232035_37 | 0.2<br>20<br>67<br>98<br>81 | 0.3<br>40<br>32<br>92<br>33      | 0.8<br>91<br>82<br>55<br>59 | d_<br>_B<br>act<br>eri<br>a | p_<br>_A<br>ctino<br>bacte<br>riota | c_<br>_Co<br>riobac<br>teriia | o_<br>_Cor<br>iobact<br>eriales | f_<br>_Cori<br>obacteri<br>aceae   | g_<br>_Collins<br>ella    | s_<br>_Collinsella<br>sp002232035<br>_37 |
| MGYG-HGUT-04290:s__Alistipes unknown_26       | 0.0<br>74<br>10<br>88<br>16 | 0.4<br>96<br>50<br>89<br>11      | 0.8<br>77<br>82<br>62<br>47 | d_<br>_B<br>act<br>eri<br>a | p_<br>_B<br>acter<br>oidot<br>a     | c_<br>_Ba<br>cteroi<br>dia    | o_<br>_Bac<br>teroida<br>les    | f_<br>_Rike<br>nellacea<br>e       | g_<br>_Alistipe<br>s      | s_<br>_Alistipes<br>unknown_26           |
| MGYG-HGUT-04294:s__Collinsella unknown_426    | 0.1<br>52<br>91<br>16<br>53 | 0.3<br>95<br>78<br>85<br>2       | 0.8<br>91<br>82<br>55<br>59 | d_<br>_B<br>act<br>eri<br>a | p_<br>_A<br>ctino<br>bacte<br>riota | c_<br>_Co<br>riobac<br>teriia | o_<br>_Cor<br>iobact<br>eriales | f_<br>_Cori<br>obacteri<br>aceae   | g_<br>_Collins<br>ella    | s_<br>_Collinsella<br>unknown_42<br>6    |
| MGYG-HGUT-04296:s__Ruminococcus_A sp000437095 | 0.5<br>85<br>06<br>94<br>34 | 0.1<br>51<br>59<br>50<br>38      | 0.9<br>75<br>67<br>17<br>57 | d_<br>_B<br>act<br>eri<br>a | p_<br>_Fi<br>rmicu<br>tes_A         | c_<br>_Clo<br>stridia         | o_<br>_Lac<br>hnospi<br>rales   | f_<br>_Lach<br>nospi<br>rac<br>eae | g_<br>_Rumin<br>ococcus_A | s_<br>_Ruminoco<br>ccus_A<br>sp000437095 |

|                                                      |                             |                                   |                                   |                             |                                     |                               |                                            |                                       |                                    |                                                 |
|------------------------------------------------------|-----------------------------|-----------------------------------|-----------------------------------|-----------------------------|-------------------------------------|-------------------------------|--------------------------------------------|---------------------------------------|------------------------------------|-------------------------------------------------|
| MGYG-HGUT-04297:s__Collinsella unknown_427           | 0.0<br>10<br>86<br>96<br>25 | 0.6<br>89<br>72<br>66<br>44       | 0.7<br>68<br>22<br>58<br>34       | d_<br>_B<br>act<br>eri<br>a | p__A<br>ctino<br>bacte<br>riota     | c__Co<br>riobac<br>teriia     | o__Cor<br>iobact<br>eriales                | f__Cori<br>obacteri<br>aceae          | g__Collins<br>ella                 | s__Collinsella<br>unknown_42<br>7               |
| MGYG-HGUT-04305:s__Collinsella unknown_429           | 0.0<br>18<br>25<br>61<br>45 | 0.6<br>52<br>03<br>09<br>02       | 0.7<br>68<br>22<br>58<br>34       | d_<br>_B<br>act<br>eri<br>a | p__A<br>ctino<br>bacte<br>riota     | c__Co<br>riobac<br>teriia     | o__Cor<br>iobact<br>eriales                | f__Cori<br>obacteri<br>aceae          | g__Collins<br>ella                 | s__Collinsella<br>unknown_42<br>9               |
| MGYG-HGUT-04307:s__Collinsella aerofaciens_F_34      | 0.1<br>22<br>92<br>33<br>68 | 0.4<br>16<br>62<br>74<br>21<br>78 | 0.8<br>85<br>74<br>74<br>21<br>75 | d_<br>_B<br>act<br>eri<br>a | p__A<br>ctino<br>bacte<br>riota     | c__Co<br>riobac<br>teriia     | o__Cor<br>iobact<br>eriales                | f__Cori<br>obacteri<br>aceae          | g__Collins<br>ella                 | s__Collinsella<br>aerofaciens_F<br>_34          |
| MGYG-HGUT-04308:s__CAG-145 sp000435615               | 0.4<br>65<br>11<br>73<br>65 | 0.2<br>00<br>66<br>28<br>07       | 0.9<br>68<br>03<br>76<br>13       | d_<br>_B<br>act<br>eri<br>a | p__Fi<br>rmicu<br>tes_A             | c__Clo<br>stridia             | o__Pe<br>ptostre<br>ptococ<br>cales        | f__Anae<br>rorovac<br>aceae           | g__CAG-<br>145                     | s__CAG-145<br>sp000435615                       |
| MGYG-HGUT-04312:s__Methanomassiliococcus_A unknown_3 | 0.4<br>07<br>05<br>71<br>18 | 0.2<br>30<br>67<br>86<br>38       | 0.9<br>39<br>70<br>92<br>5        | d_<br>_A<br>rc<br>ha<br>ea  | p__T<br>herm<br>oplas<br>mato<br>ta | c__Th<br>ermop<br>lasmat<br>a | o__Me<br>thano<br>massilii<br>coccal<br>es | f__Met<br>hanoma<br>ssilioc<br>caceae | g__Metha<br>nomassiliic<br>occus_A | s__Methano<br>massiliococcus<br>_A<br>unknown_3 |
| MGYG-HGUT-04316:s__Granulicatella adiacens           | 0.6<br>61<br>66<br>05<br>05 | 0.1<br>21<br>15<br>48<br>91       | 0.9<br>75<br>67<br>17<br>57       | d_<br>_B<br>act<br>eri<br>a | p__Fi<br>rmicu<br>tes               | c__Ba<br>cilli                | o__Lac<br>tobacill<br>ales                 | f__Aero<br>coccace<br>ae              | g__Granuli<br>catella              | s__Granulicat<br>ella adiacens                  |
| MGYG-HGUT-04317:s__Lachnospira sp900316325           | 0.1<br>92<br>02<br>37<br>53 | 0.3<br>56<br>51<br>64<br>11       | 0.8<br>91<br>82<br>55<br>59       | d_<br>_B<br>act<br>eri<br>a | p__Fi<br>rmicu<br>tes_A             | c__Clo<br>stridia             | o__Lac<br>hnospi<br>rales                  | f__Lach<br>nospirac<br>eae            | g__Lachno<br>spira                 | s__Lachnospir<br>a<br>sp900316325               |
| MGYG-HGUT-04320:s__Collinsella unknown_431           | 0.1<br>87<br>90<br>52<br>35 | 0.3<br>68<br>14<br>61<br>42       | 0.8<br>91<br>82<br>55<br>59       | d_<br>_B<br>act<br>eri<br>a | p__A<br>ctino<br>bacte<br>riota     | c__Co<br>riobac<br>teriia     | o__Cor<br>iobact<br>eriales                | f__Cori<br>obacteri<br>aceae          | g__Collins<br>ella                 | s__Collinsella<br>unknown_43<br>1               |
| MGYG-HGUT-04321:s__Streptococcus constellatus        | 0.8<br>78<br>30<br>13<br>15 | -<br>0.0<br>42<br>47<br>00<br>41  | 0.9<br>94<br>47<br>94<br>74       | d_<br>_B<br>act<br>eri<br>a | p__Fi<br>rmicu<br>tes               | c__Ba<br>cilli                | o__Lac<br>tobacill<br>ales                 | f__Stre<br>ptococc<br>aceae           | g__Strepto<br>coccus               | s__Streptococ<br>cus<br>constellatus            |

|                                                   |                             |                                  |                             |                             |                                     |                               |                                 |                                   |                                   |                                             |
|---------------------------------------------------|-----------------------------|----------------------------------|-----------------------------|-----------------------------|-------------------------------------|-------------------------------|---------------------------------|-----------------------------------|-----------------------------------|---------------------------------------------|
| MGYG-HGUT-04323:s__CAG-180 sp000432435            | 0.4<br>47<br>31<br>95<br>66 | 0.2<br>09<br>22<br>80<br>4       | 0.9<br>61<br>29<br>22<br>08 | d_<br>_B<br>act<br>eri<br>a | p_<br>_Fi<br>rmicu<br>tes_A         | c_<br>_Clo<br>stridia         | o_<br>_Os<br>cillospi<br>rales  | f_<br>_Acut<br>alibacte<br>raceae | g_<br>_CAG-<br>180                | s_<br>_CAG-180<br>sp000432435               |
| MGYG-HGUT-04325:s__Collinsella unknown_433        | 0.0<br>59<br>66<br>70<br>94 | 0.5<br>01<br>94<br>68<br>32      | 0.8<br>57<br>21<br>13<br>2  | d_<br>_B<br>act<br>eri<br>a | p_<br>_A<br>ctino<br>bacte<br>riota | c_<br>_Co<br>riobac<br>teriia | o_<br>_Cor<br>iobact<br>eriales | f_<br>_Cori<br>obacteri<br>aceae  | g_<br>_Collins<br>ella            | s_<br>_Collinsella<br>unknown_43<br>3       |
| MGYG-HGUT-04326:s__Collinsella unknown_434        | 0.3<br>96<br>27<br>59<br>4  | 0.2<br>31<br>29<br>90<br>36      | 0.9<br>39<br>70<br>92<br>5  | d_<br>_B<br>act<br>eri<br>a | p_<br>_A<br>ctino<br>bacte<br>riota | c_<br>_Co<br>riobac<br>teriia | o_<br>_Cor<br>iobact<br>eriales | f_<br>_Cori<br>obacteri<br>aceae  | g_<br>_Collins<br>ella            | s_<br>_Collinsella<br>unknown_43<br>4       |
| MGYG-HGUT-04328:s__Collinsella aerofaciens_F_35   | 0.1<br>76<br>27<br>42<br>11 | 0.3<br>60<br>51<br>90<br>87      | 0.8<br>91<br>82<br>55<br>59 | d_<br>_B<br>act<br>eri<br>a | p_<br>_A<br>ctino<br>bacte<br>riota | c_<br>_Co<br>riobac<br>teriia | o_<br>_Cor<br>iobact<br>eriales | f_<br>_Cori<br>obacteri<br>aceae  | g_<br>_Collins<br>ella            | s_<br>_Collinsella<br>aerofaciens_F<br>_35  |
| MGYG-HGUT-04329:s__Prevotella massilia unknown_14 | 0.8<br>76<br>74<br>44<br>53 | -<br>0.0<br>42<br>77<br>11       | 0.9<br>94<br>47<br>94<br>74 | d_<br>_B<br>act<br>eri<br>a | p_<br>_B<br>acter<br>oidot<br>a     | c_<br>_Ba<br>cteroi<br>dia    | o_<br>_Bac<br>teroida<br>les    | f_<br>_Bact<br>eroidac<br>eae     | g_<br>_Prevot<br>ellamassili<br>a | s_<br>_Prevotella<br>massilia<br>unknown_14 |
| MGYG-HGUT-04330:s__Collinsella unknown_435        | 0.6<br>17<br>60<br>67<br>77 | -<br>0.1<br>38<br>27<br>23<br>84 | 0.9<br>75<br>67<br>17<br>57 | d_<br>_B<br>act<br>eri<br>a | p_<br>_A<br>ctino<br>bacte<br>riota | c_<br>_Co<br>riobac<br>teriia | o_<br>_Cor<br>iobact<br>eriales | f_<br>_Cori<br>obacteri<br>aceae  | g_<br>_Collins<br>ella            | s_<br>_Collinsella<br>unknown_43<br>5       |
| MGYG-HGUT-04331:s__Collinsella unknown_436        | 0.3<br>63<br>90<br>18<br>4  | 0.2<br>46<br>24<br>01<br>7       | 0.9<br>39<br>70<br>92<br>5  | d_<br>_B<br>act<br>eri<br>a | p_<br>_A<br>ctino<br>bacte<br>riota | c_<br>_Co<br>riobac<br>teriia | o_<br>_Cor<br>iobact<br>eriales | f_<br>_Cori<br>obacteri<br>aceae  | g_<br>_Collins<br>ella            | s_<br>_Collinsella<br>unknown_43<br>6       |
| MGYG-HGUT-04332:s__Collinsella unknown_437        | 0.7<br>06<br>32<br>78<br>88 | -<br>0.1<br>04<br>10<br>13<br>05 | 0.9<br>79<br>45<br>84<br>75 | d_<br>_B<br>act<br>eri<br>a | p_<br>_A<br>ctino<br>bacte<br>riota | c_<br>_Co<br>riobac<br>teriia | o_<br>_Cor<br>iobact<br>eriales | f_<br>_Cori<br>obacteri<br>aceae  | g_<br>_Collins<br>ella            | s_<br>_Collinsella<br>unknown_43<br>7       |
| MGYG-HGUT-04334:s__Ruminococcus_E sp002493635     | 0.0<br>26<br>89<br>19<br>87 | 0.6<br>08<br>26<br>37<br>52      | 0.7<br>68<br>22<br>58<br>34 | d_<br>_B<br>act<br>eri<br>a | p_<br>_Fi<br>rmicu<br>tes_A         | c_<br>_Clo<br>stridia         | o_<br>_Os<br>cillospi<br>rales  | f_<br>_Acut<br>alibacte<br>raceae | g_<br>_Rumin<br>ococcus_E         | s_<br>_Ruminoco<br>ccus_E<br>sp002493635    |

|                                                |             |              |             |             |                   |                    |                      |                       |                     |                                |
|------------------------------------------------|-------------|--------------|-------------|-------------|-------------------|--------------------|----------------------|-----------------------|---------------------|--------------------------------|
| MGYG-HGUT-04335:s__Collinsella unknown_438     | 0.380379711 | -0.240645342 | 0.93970925  | d__Bacteria | p__Actinobacteria | c__Corynebacteriia | o__Corynebacteriales | f__Corynebacteriaceae | g__Collinsella      | s__Collinsella unknown_438     |
| MGYG-HGUT-04336:s__Faecalibacterium unknown_16 | 0.241812107 | 0.327663297  | 0.902181367 | d__Bacteria | p__Firmicutes_A   | c__Clostridia      | o__Oscillospirales   | f__Ruminococcaceae    | g__Faecalibacterium | s__Faecalibacterium unknown_16 |
| MGYG-HGUT-04340:s__Faecalibacterium unknown_17 | 0.045633661 | 0.547321875  | 0.799667098 | d__Bacteria | p__Firmicutes_A   | c__Clostridia      | o__Oscillospirales   | f__Ruminococcaceae    | g__Faecalibacterium | s__Faecalibacterium unknown_17 |
| MGYG-HGUT-04341:s__CAG-110 sp000435995         | 0.295743882 | -0.287172347 | 0.929025913 | d__Bacteria | p__Firmicutes_A   | c__Clostridia      | o__Oscillospirales   | f__Oscillospiraceae   | g__CAG-110          | s__CAG-110 sp000435995         |
| MGYG-HGUT-04344:s__Collinsella unknown_439     | 0.595547195 | 0.145111334  | 0.975671757 | d__Bacteria | p__Actinobacteria | c__Corynebacteriia | o__Corynebacteriales | f__Corynebacteriaceae | g__Collinsella      | s__Collinsella unknown_439     |
| MGYG-HGUT-04345:s__Streptococcus thermophilus  | 0.548105818 | 0.162722587  | 0.968532073 | d__Bacteria | p__Firmicutes     | c__Bacilli         | o__Lactobacillales   | f__Streptococcaceae   | g__Streptococcus    | s__Streptococcus thermophilus  |
| MGYG-HGUT-04346:s__Collinsella unknown_440     | 0.43963911  | 0.216567604  | 0.95576045  | d__Bacteria | p__Actinobacteria | c__Corynebacteriia | o__Corynebacteriales | f__Corynebacteriaceae | g__Collinsella      | s__Collinsella unknown_440     |
| MGYG-HGUT-04349:s__Collinsella unknown_441     | 0.585256917 | 0.151030003  | 0.975671757 | d__Bacteria | p__Actinobacteria | c__Corynebacteriia | o__Corynebacteriales | f__Corynebacteriaceae | g__Collinsella      | s__Collinsella unknown_441     |
| MGYG-HGUT-04350:s__CAG-245 unknown_4           | 0.324102352 | -0.275536654 | 0.930624692 | d__Bacteria | p__Firmicutes_A   | c__Clostridia      | o__TANB77            | f__CAG-508            | g__CAG-245          | s__CAG-245 unknown_4           |

|                                                |                             |                                              |                             |                             |                                 |                           |                             |                                |                     |                                       |
|------------------------------------------------|-----------------------------|----------------------------------------------|-----------------------------|-----------------------------|---------------------------------|---------------------------|-----------------------------|--------------------------------|---------------------|---------------------------------------|
| MGYG-HGUT-04358:s__Collinsella unknown_442     | 0.5<br>67<br>45<br>22<br>09 | 0.1<br>54<br>64<br>12<br>41                  | 0.9<br>71<br>33<br>90<br>3  | d_<br>_B<br>act<br>eri<br>a | p__A<br>ctino<br>bacte<br>riota | c__Co<br>riobac<br>teriia | o__Cor<br>iobact<br>eriales | f__Cori<br>obacteri<br>aceae   | g__Collins<br>ella  | s__Collinsella<br>unknown_44<br>2     |
| MGYG-HGUT-04359:s__Anaerostipes unknown_4      | 0.7<br>73<br>72<br>02<br>11 | -<br>0.0<br>79<br>52<br>89<br>04<br>46<br>98 | 0.9<br>79<br>52<br>04<br>84 | d_<br>_B<br>act<br>eri<br>a | p__Fi<br>rmicu<br>tes_A         | c__Clo<br>stridia         | o__Lac<br>hnospi<br>rales   | f__Lach<br>nospi<br>rac<br>eae | g__Anaero<br>stipes | s__Anaerosti<br>pes<br>unknown_4      |
| MGYG-HGUT-04363:s__Collinsella unknown_443     | 0.2<br>11<br>64<br>11<br>61 | 0.3<br>44<br>74<br>41<br>42                  | 0.8<br>91<br>82<br>55<br>59 | d_<br>_B<br>act<br>eri<br>a | p__A<br>ctino<br>bacte<br>riota | c__Co<br>riobac<br>teriia | o__Cor<br>iobact<br>eriales | f__Cori<br>obacteri<br>aceae   | g__Collins<br>ella  | s__Collinsella<br>unknown_44<br>3     |
| MGYG-HGUT-04364:s__Collinsella unknown_444     | 0.7<br>61<br>60<br>18<br>04 | -<br>0.0<br>82<br>23<br>43<br>35             | 0.9<br>79<br>45<br>84<br>75 | d_<br>_B<br>act<br>eri<br>a | p__A<br>ctino<br>bacte<br>riota | c__Co<br>riobac<br>teriia | o__Cor<br>iobact<br>eriales | f__Cori<br>obacteri<br>aceae   | g__Collins<br>ella  | s__Collinsella<br>unknown_44<br>4     |
| MGYG-HGUT-04366:s__Collinsella unknown_445     | 0.6<br>30<br>70<br>86<br>75 | 0.1<br>32<br>89<br>25<br>35                  | 0.9<br>75<br>67<br>17<br>57 | d_<br>_B<br>act<br>eri<br>a | p__A<br>ctino<br>bacte<br>riota | c__Co<br>riobac<br>teriia | o__Cor<br>iobact<br>eriales | f__Cori<br>obacteri<br>aceae   | g__Collins<br>ella  | s__Collinsella<br>unknown_44<br>5     |
| MGYG-HGUT-04367:s__Collinsella unknown_446     | 0.1<br>14<br>60<br>60<br>65 | 0.4<br>28<br>64<br>14<br>37                  | 0.8<br>83<br>30<br>72<br>56 | d_<br>_B<br>act<br>eri<br>a | p__A<br>ctino<br>bacte<br>riota | c__Co<br>riobac<br>teriia | o__Cor<br>iobact<br>eriales | f__Cori<br>obacteri<br>aceae   | g__Collins<br>ella  | s__Collinsella<br>unknown_44<br>6     |
| MGYG-HGUT-04368:s__Collinsella aerofaciens_A_2 | 0.2<br>94<br>60<br>44<br>97 | 0.2<br>63<br>54<br>53<br>06                  | 0.9<br>29<br>02<br>59<br>13 | d_<br>_B<br>act<br>eri<br>a | p__A<br>ctino<br>bacte<br>riota | c__Co<br>riobac<br>teriia | o__Cor<br>iobact<br>eriales | f__Cori<br>obacteri<br>aceae   | g__Collins<br>ella  | s__Collinsella<br>aerofaciens_A<br>_2 |
| MGYG-HGUT-04369:s__CAG-882 sp000435595         | 0.4<br>92<br>98<br>70<br>66 | 0.1<br>88<br>42<br>58<br>06                  | 0.9<br>68<br>53<br>20<br>73 | d_<br>_B<br>act<br>eri<br>a | p__Fi<br>rmicu<br>tes_A         | c__Clo<br>stridia         | o__Lac<br>hnospi<br>rales   | f__Lach<br>nospi<br>rac<br>eae | g__CAG-<br>882      | s__CAG-882<br>sp000435595             |
| MGYG-HGUT-04371:s__Prevotella sp002251385      | 0.7<br>47<br>63<br>54<br>54 | -<br>0.0<br>87<br>44<br>79<br>05             | 0.9<br>79<br>45<br>84<br>75 | d_<br>_B<br>act<br>eri<br>a | p__B<br>acter<br>oidot<br>a     | c__Ba<br>cteroi<br>dia    | o__Bac<br>teroida<br>les    | f__Bact<br>eroidac<br>eae      | g__Prevot<br>ella   | s__Prevotella<br>sp002251385          |

|                                            |                             |                                  |                             |                             |                                 |                           |                                   |                                |                     |                                   |
|--------------------------------------------|-----------------------------|----------------------------------|-----------------------------|-----------------------------|---------------------------------|---------------------------|-----------------------------------|--------------------------------|---------------------|-----------------------------------|
| MGYG-HGUT-04373:s__Collinsella unknown_447 | 0.6<br>20<br>12<br>77<br>52 | -<br>0.1<br>37<br>69<br>91<br>03 | 0.9<br>75<br>67<br>17<br>57 | d_<br>_B<br>act<br>eri<br>a | p__A<br>ctino<br>bacte<br>riota | c__Co<br>riobac<br>teriia | o__Cor<br>iobact<br>eriales       | f__Cori<br>obacteri<br>aceae   | g__Collins<br>ella  | s__Collinsella<br>unknown_44<br>7 |
| MGYG-HGUT-04375:s__Holdemella unknown_4    | 0.9<br>65<br>11<br>04<br>48 | 0.0<br>12<br>06<br>56<br>54      | 0.9<br>94<br>47<br>94<br>74 | d_<br>_B<br>act<br>eri<br>a | p__Fi<br>rmicu<br>tes           | c__Ba<br>cilli            | o__Ery<br>sipelot<br>richale<br>s | f__Erysi<br>pelotric<br>haceae | g__Holde<br>manella | s__Holdemella<br>unknown_4        |
| MGYG-HGUT-04376:s__CAG-83 unknown_17       | 0.0<br>88<br>04<br>22<br>81 | 0.4<br>57<br>62                  | 0.8<br>82<br>71<br>60<br>64 | d_<br>_B<br>act<br>eri<br>a | p__Fi<br>rmicu<br>tes_A         | c__Clo<br>stridia         | o__Os<br>cillospi<br>rales        | f__Oscil<br>lospirac<br>eae    | g__CAG-<br>83       | s__CAG-83<br>unknown_17           |
| MGYG-HGUT-04378:s__Collinsella unknown_449 | 0.6<br>29<br>56<br>49<br>32 | 0.1<br>34<br>69<br>00<br>9       | 0.9<br>75<br>67<br>17<br>57 | d_<br>_B<br>act<br>eri<br>a | p__A<br>ctino<br>bacte<br>riota | c__Co<br>riobac<br>teriia | o__Cor<br>iobact<br>eriales       | f__Cori<br>obacteri<br>aceae   | g__Collins<br>ella  | s__Collinsella<br>unknown_44<br>9 |
| MGYG-HGUT-04380:s__CAG-590 unknown_5       | 0.4<br>61<br>47<br>98<br>06 | 0.1<br>92<br>31<br>93<br>99      | 0.9<br>65<br>57<br>46<br>92 | d_<br>_B<br>act<br>eri<br>a | p__Fi<br>rmicu<br>tes_A         | c__Clo<br>stridia         | o__Lac<br>hnospi<br>rales         | f__Lach<br>nospirac<br>eae     | g__CAG-<br>590      | s__CAG-590<br>unknown_5           |
| MGYG-HGUT-04381:s__Lachnospira unknown_4   | 0.7<br>68<br>02<br>03<br>82 | 0.0<br>79<br>38<br>07<br>84      | 0.9<br>79<br>52<br>04<br>84 | d_<br>_B<br>act<br>eri<br>a | p__Fi<br>rmicu<br>tes_A         | c__Clo<br>stridia         | o__Lac<br>hnospi<br>rales         | f__Lach<br>nospirac<br>eae     | g__Lachno<br>spira  | s__Lachnospir<br>a unknown_4      |
| MGYG-HGUT-04382:s__UBA2821 unknown         | 0.1<br>40<br>23<br>88<br>21 | 0.4<br>05<br>99<br>99<br>82      | 0.8<br>91<br>82<br>55<br>59 | d_<br>_B<br>act<br>eri<br>a | p__Fi<br>rmicu<br>tes_A         | c__Clo<br>stridia         | o__Lac<br>hnospi<br>rales         | f__Lach<br>nospirac<br>eae     | g__UBA28<br>21      | s__UBA2821<br>unknown             |
| MGYG-HGUT-04384:s__Ruminococcus unknown_8  | 0.9<br>84<br>63<br>79<br>92 | 0.0<br>05<br>27<br>57<br>23      | 0.9<br>98<br>80<br>33<br>46 | d_<br>_B<br>act<br>eri<br>a | p__Fi<br>rmicu<br>tes_A         | c__Clo<br>stridia         | o__Os<br>cillospi<br>rales        | f__Rumi<br>nococca<br>ceae     | g__Rumin<br>ococcus | s__Ruminoco<br>ccus<br>unknown_8  |
| MGYG-HGUT-04385:s__Lachnospira unknown_5   | 0.6<br>06<br>05<br>82<br>28 | 0.1<br>43<br>73<br>84<br>19      | 0.9<br>75<br>67<br>17<br>57 | d_<br>_B<br>act<br>eri<br>a | p__Fi<br>rmicu<br>tes_A         | c__Clo<br>stridia         | o__Lac<br>hnospi<br>rales         | f__Lach<br>nospirac<br>eae     | g__Lachno<br>spira  | s__Lachnospir<br>a unknown_5      |

|                                             |             |                |             |             |                   |                   |                     |                      |                  |                             |
|---------------------------------------------|-------------|----------------|-------------|-------------|-------------------|-------------------|---------------------|----------------------|------------------|-----------------------------|
| MGYG-HGUT-04386:s__Collinsella unknown_451  | 0.4602407   | 0.19738256     | 0.965574692 | d__Bacteria | p__Actinobacteria | c__Coriobacteriia | o__Coriobacteriales | f__Coriobacteriaceae | g__Collinsella   | s__Collinsella unknown_451  |
| MGYG-HGUT-04387:s__Collinsella unknown_452  | 0.145501545 | 0.405992047    | 0.891825559 | d__Bacteria | p__Actinobacteria | c__Coriobacteriia | o__Coriobacteriales | f__Coriobacteriaceae | g__Collinsella   | s__Collinsella unknown_452  |
| MGYG-HGUT-04388:s__F23-B02 sp001916715      | 0.084733971 | 0.473720618    | 0.882716064 | d__Bacteria | p__Firmicutes_A   | c__Clostridia     | o__Oscillospirales  | f__Oscillospiraceae  | g__F23-B02       | s__F23-B02 sp001916715      |
| MGYG-HGUT-04390:s__Prevotella sp002265625   | 0.742934457 | -0.09045171946 | 0.979458475 | d__Bacteria | p__Bacteroidota   | c__Bacteroidia    | o__Bacteroidales    | f__Bacteroidaceae    | g__Prevotella    | s__Prevotella sp002265625   |
| MGYG-HGUT-04392:s__Eubacterium_R unknown_23 | 0.515135947 | 0.179731939    | 0.968532073 | d__Bacteria | p__Firmicutes_A   | c__Clostridia     | o__Oscillospirales  | f__Acetivibrionaceae | g__Eubacterium_R | s__Eubacterium_R unknown_23 |
| MGYG-HGUT-04396:s__Collinsella unknown_453  | 0.758816313 | 0.083437832    | 0.979458475 | d__Bacteria | p__Actinobacteria | c__Coriobacteriia | o__Coriobacteriales | f__Coriobacteriaceae | g__Collinsella   | s__Collinsella unknown_453  |
| MGYG-HGUT-04398:s__Collinsella unknown_454  | 0.313309118 | 0.277941221    | 0.929025913 | d__Bacteria | p__Actinobacteria | c__Coriobacteriia | o__Coriobacteriales | f__Coriobacteriaceae | g__Collinsella   | s__Collinsella unknown_454  |
| MGYG-HGUT-04399:s__Collinsella unknown_455  | 0.083275278 | 0.476297081    | 0.881142843 | d__Bacteria | p__Actinobacteria | c__Coriobacteriia | o__Coriobacteriales | f__Coriobacteriaceae | g__Collinsella   | s__Collinsella unknown_455  |
| MGYG-HGUT-04402:s__RC9 sp000432515          | 0.853169489 | 0.05079914     | 0.992878088 | d__Bacteria | p__Bacteroidota   | c__Bacteroidia    | o__Bacteroidales    | f__UBA932            | g__RC9           | s__RC9 sp000432515          |

|                                            |                             |                                  |                             |                             |                                 |                           |                             |                                |                     |                                   |
|--------------------------------------------|-----------------------------|----------------------------------|-----------------------------|-----------------------------|---------------------------------|---------------------------|-----------------------------|--------------------------------|---------------------|-----------------------------------|
| MGYG-HGUT-04403:s__Agathobacter unknown_6  | 0.3<br>25<br>28<br>99<br>94 | 0.2<br>70<br>54<br>62<br>9       | 0.9<br>30<br>62<br>46<br>92 | d_<br>_B<br>act<br>eri<br>a | p__Fi<br>rmicu<br>tes_A         | c__Clo<br>stridia         | o__Lac<br>hnospi<br>rales   | f__Lach<br>nospi<br>rac<br>eae | g__Agath<br>obacter | s__Agathobac<br>ter<br>unknown_6  |
| MGYG-HGUT-04407:s__Collinsella unknown_456 | 0.4<br>17<br>52<br>89<br>57 | 0.2<br>22<br>17<br>65<br>34      | 0.9<br>39<br>70<br>92<br>5  | d_<br>_B<br>act<br>eri<br>a | p__A<br>ctino<br>bacte<br>riota | c__Co<br>riobac<br>teriia | o__Cor<br>iobact<br>eriales | f__Cori<br>obacteri<br>aceae   | g__Collins<br>ella  | s__Collinsella<br>unknown_45<br>6 |
| MGYG-HGUT-04408:s__Collinsella unknown_457 | 0.5<br>19<br>12<br>45<br>72 | 0.1<br>73<br>15<br>96<br>11      | 0.9<br>68<br>53<br>20<br>73 | d_<br>_B<br>act<br>eri<br>a | p__A<br>ctino<br>bacte<br>riota | c__Co<br>riobac<br>teriia | o__Cor<br>iobact<br>eriales | f__Cori<br>obacteri<br>aceae   | g__Collins<br>ella  | s__Collinsella<br>unknown_45<br>7 |
| MGYG-HGUT-04412:s__CAG-83 sp900313295      | 0.5<br>98<br>58<br>21<br>37 | 0.1<br>41<br>23<br>27<br>43      | 0.9<br>75<br>67<br>17<br>57 | d_<br>_B<br>act<br>eri<br>a | p__Fi<br>rmicu<br>tes_A         | c__Clo<br>stridia         | o__Os<br>cillospi<br>rales  | f__Oscil<br>lospirac<br>eae    | g__CAG-<br>83       | s__CAG-83<br>sp900313295          |
| MGYG-HGUT-04413:s__CAG-488 sp003486665     | 0.6<br>67<br>25<br>37<br>55 | -<br>0.1<br>19<br>78<br>19<br>66 | 0.9<br>75<br>67<br>17<br>57 | d_<br>_B<br>act<br>eri<br>a | p__Fi<br>rmicu<br>tes_A         | c__Clo<br>stridia         | o__Os<br>cillospi<br>rales  | f__Acut<br>alibacte<br>raceae  | g__CAG-<br>488      | s__CAG-488<br>sp003486665         |
| MGYG-HGUT-04414:s__Agathobacter unknown_7  | 0.0<br>43<br>19<br>89<br>31 | 0.5<br>58<br>99<br>61<br>8       | 0.7<br>79<br>32<br>10<br>52 | d_<br>_B<br>act<br>eri<br>a | p__Fi<br>rmicu<br>tes_A         | c__Clo<br>stridia         | o__Lac<br>hnospi<br>rales   | f__Lach<br>nospi<br>rac<br>eae | g__Agath<br>obacter | s__Agathobac<br>ter<br>unknown_7  |
| MGYG-HGUT-04415:s__Collinsella unknown_458 | 0.0<br>38<br>92<br>11<br>55 | 0.5<br>53<br>92<br>71<br>54      | 0.7<br>68<br>22<br>58<br>34 | d_<br>_B<br>act<br>eri<br>a | p__A<br>ctino<br>bacte<br>riota | c__Co<br>riobac<br>teriia | o__Cor<br>iobact<br>eriales | f__Cori<br>obacteri<br>aceae   | g__Collins<br>ella  | s__Collinsella<br>unknown_45<br>8 |
| MGYG-HGUT-04421:s__Collinsella unknown_459 | 0.0<br>73<br>49<br>85<br>72 | 0.4<br>80<br>19<br>94<br>29      | 0.8<br>77<br>82<br>62<br>47 | d_<br>_B<br>act<br>eri<br>a | p__A<br>ctino<br>bacte<br>riota | c__Co<br>riobac<br>teriia | o__Cor<br>iobact<br>eriales | f__Cori<br>obacteri<br>aceae   | g__Collins<br>ella  | s__Collinsella<br>unknown_45<br>9 |
| MGYG-HGUT-04422:s__Collinsella unknown_460 | 0.3<br>66<br>77<br>45<br>09 | 0.2<br>51<br>38<br>46<br>5       | 0.9<br>39<br>70<br>92<br>5  | d_<br>_B<br>act<br>eri<br>a | p__A<br>ctino<br>bacte<br>riota | c__Co<br>riobac<br>teriia | o__Cor<br>iobact<br>eriales | f__Cori<br>obacteri<br>aceae   | g__Collins<br>ella  | s__Collinsella<br>unknown_46<br>0 |



|                                               |                             |                                  |                             |                             |                                       |                                 |                                   |                                |                    |                                   |
|-----------------------------------------------|-----------------------------|----------------------------------|-----------------------------|-----------------------------|---------------------------------------|---------------------------------|-----------------------------------|--------------------------------|--------------------|-----------------------------------|
| MGYG-HGUT-04431:s__COE1<br>sp001916965        | 0.6<br>85<br>80<br>83<br>49 | 0.1<br>13<br>36<br>91<br>03      | 0.9<br>75<br>76<br>85<br>79 | d_<br>_B<br>act<br>eri<br>a | p__Fi<br>rmicu<br>tes_A               | c__Clo<br>stridia               | o__Lac<br>hnospi<br>rales         | f__Lach<br>nospi<br>rac<br>eae | g__COE1            | s__COE1<br>sp001916965            |
| MGYG-HGUT-04433:s__Bilophila<br>unknown_5     | 0.3<br>67<br>78<br>77<br>5  | 0.2<br>52<br>32<br>31<br>62      | 0.9<br>39<br>70<br>92<br>5  | d_<br>_B<br>act<br>eri<br>a | p__D<br>esulf<br>obact<br>erota<br>_A | c__De<br>sulfovi<br>brioni<br>a | o__De<br>sulfovi<br>brional<br>es | f__Desu<br>lfovibrio<br>naceae | g__Bilophil<br>a   | s__Bilophila<br>unknown_5         |
| MGYG-HGUT-04438:s__UBA464<br>4 unknown_3      | 0.2<br>19<br>06<br>54<br>97 | 0.3<br>26<br>65<br>33<br>95      | 0.8<br>91<br>82<br>55<br>59 | d_<br>_B<br>act<br>eri<br>a | p__Fi<br>rmicu<br>tes_A               | c__Clo<br>stridia               | o__Os<br>cillospi<br>rales        | f__Buty<br>ricicoc<br>ceae     | g__UBA46<br>44     | s__UBA4644<br>unknown_3           |
| MGYG-HGUT-04440:s__CAG-449<br>unknown_2       | 0.0<br>11<br>56<br>12<br>94 | 0.6<br>95<br>69<br>23<br>34      | 0.7<br>68<br>22<br>58<br>34 | d_<br>_B<br>act<br>eri<br>a | p__Fi<br>rmicu<br>tes                 | c__Ba<br>cilli                  | o__RF<br>N20                      | f__CAG-<br>449                 | g__CAG-<br>449     | s__CAG-449<br>unknown_2           |
| MGYG-HGUT-04449:s__CAG-245<br>unknown_5       | 0.6<br>88<br>08<br>52<br>52 | 0.1<br>10<br>09<br>09<br>44      | 0.9<br>75<br>76<br>85<br>79 | d_<br>_B<br>act<br>eri<br>a | p__Fi<br>rmicu<br>tes_A               | c__Clo<br>stridia               | o__TA<br>NB77                     | f__CAG-<br>508                 | g__CAG-<br>245     | s__CAG-245<br>unknown_5           |
| MGYG-HGUT-04450:s__Collinsella<br>unknown_463 | 0.2<br>99<br>11<br>34<br>66 | -<br>0.2<br>78<br>23<br>25<br>61 | 0.9<br>29<br>02<br>59<br>13 | d_<br>_B<br>act<br>eri<br>a | p__A<br>ctino<br>bacte<br>riota       | c__Co<br>riobac<br>teriia       | o__Cor<br>iobact<br>eriales       | f__Cori<br>obacteri<br>aceae   | g__Collins<br>ella | s__Collinsella<br>unknown_46<br>3 |
| MGYG-HGUT-04451:s__CAG-313<br>sp003539625     | 0.9<br>42<br>04<br>36<br>84 | -<br>0.0<br>20<br>35<br>53<br>84 | 0.9<br>94<br>47<br>94<br>74 | d_<br>_B<br>act<br>eri<br>a | p__Fi<br>rmicu<br>tes                 | c__Ba<br>cilli                  | o__ML<br>615J-<br>28              | f__CAG-<br>313                 | g__CAG-<br>313     | s__CAG-313<br>sp003539625         |
| MGYG-HGUT-04456:s__Prevotella<br>unknown_56   | 0.5<br>80<br>64<br>32<br>47 | 0.1<br>51<br>48<br>21<br>62      | 0.9<br>75<br>67<br>17<br>57 | d_<br>_B<br>act<br>eri<br>a | p__B<br>acter<br>oidot<br>a           | c__Ba<br>cteroi<br>dia          | o__Bac<br>teroida<br>les          | f__Bact<br>eroidac<br>eae      | g__Prevot<br>ella  | s__Prevotella<br>unknown_56       |
| MGYG-HGUT-04463:s__CAG-83<br>unknown_18       | 0.5<br>83<br>26<br>60<br>6  | 0.1<br>45<br>33<br>78            | 0.9<br>75<br>67<br>17<br>57 | d_<br>_B<br>act<br>eri<br>a | p__Fi<br>rmicu<br>tes_A               | c__Clo<br>stridia               | o__Os<br>cillospi<br>rales        | f__Oscil<br>lospirac<br>eae    | g__CAG-<br>83      | s__CAG-83<br>unknown_18           |

|                                                   |             |              |             |             |                    |                   |                         |                      |                  |                                   |
|---------------------------------------------------|-------------|--------------|-------------|-------------|--------------------|-------------------|-------------------------|----------------------|------------------|-----------------------------------|
| MGYG-HGUT-04466:s__Collinsella unknown_464        | 0.5140164   | 0.176299738  | 0.968532073 | d__Bacteria | p__Actinobacteria  | c__Coriobacteriia | o__Coriobacteriales     | f__Coriobacteriaceae | g__Collinsella   | s__Collinsella unknown_464        |
| MGYG-HGUT-04467:s__Collinsella unknown_465        | 0.673347483 | -0.118484032 | 0.975671757 | d__Bacteria | p__Actinobacteria  | c__Coriobacteriia | o__Coriobacteriales     | f__Coriobacteriaceae | g__Collinsella   | s__Collinsella unknown_465        |
| MGYG-HGUT-04471:s__UBA1394 unknown_3              | 0.375152055 | -0.242688135 | 0.93970925  | d__Bacteria | p__Firmicutes_A    | c__Clostridia     | o__Oscillospirales      | f__Ruminococcaceae   | g__UBA1394       | s__UBA1394 unknown_3              |
| MGYG-HGUT-04472:s__QALR01 unknown_3               | 0.169717469 | 0.383238126  | 0.891825559 | d__Bacteria | p__Firmicutes_A    | c__Clostridia     | o__Oscillospirales      | f__CAG-272           | g__QALR01        | s__QALR01 unknown_3               |
| MGYG-HGUT-04475:s__CAG-83 unknown_19              | 0.611336929 | 0.137365615  | 0.975671757 | d__Bacteria | p__Firmicutes_A    | c__Clostridia     | o__Oscillospirales      | f__Oscillospiraceae  | g__CAG-83        | s__CAG-83 unknown_19              |
| MGYG-HGUT-04477:s__CAG-273 unknown_5              | 0.73198942  | 0.094995984  | 0.979458475 | d__Bacteria | p__Firmicutes_A    | c__Clostridia     | o__TANB77               | f__CAG-508           | g__CAG-273       | s__CAG-273 unknown_5              |
| MGYG-HGUT-04479:s__Bacteroides_A mediterraneensis | 0.682478845 | 0.114669914  | 0.975671757 | d__Bacteria | p__Bacteroidetes_A | c__Bacteroidia    | o__Bacteroidales        | f__Bacteroidaceae    | g__Bacteroides_A | s__Bacteroides_A mediterraneensis |
| MGYG-HGUT-04480:s__Collinsella unknown_466        | 0.706110577 | 0.105918382  | 0.979458475 | d__Bacteria | p__Actinobacteria  | c__Coriobacteriia | o__Coriobacteriales     | f__Coriobacteriaceae | g__Collinsella   | s__Collinsella unknown_466        |
| MGYG-HGUT-04481:s__UBA1191 unknown_8              | 0.492725591 | 0.189205623  | 0.968532073 | d__Bacteria | p__Firmicutes_A    | c__Clostridia     | o__Peptostreptococcales | f__Anaerotruncaceae  | g__UBA1191       | s__UBA1191 unknown_8              |

|                                                          |                             |                                  |                             |                             |                                 |                           |                             |                               |                                       |                                                    |
|----------------------------------------------------------|-----------------------------|----------------------------------|-----------------------------|-----------------------------|---------------------------------|---------------------------|-----------------------------|-------------------------------|---------------------------------------|----------------------------------------------------|
| MGYG-HGUT-04482:s__ER4 unknown_7                         | 0.1<br>39<br>07<br>18<br>06 | 0.4<br>01<br>66<br>61<br>74      | 0.8<br>91<br>82<br>55<br>59 | d_<br>_B<br>act<br>eri<br>a | p__Fi<br>rmicu<br>tes_A         | c__Clo<br>stridia         | o__Os<br>cillospi<br>rales  | f__Oscil<br>lospirac<br>eae   | g__ER4                                | s__ER4<br>unknown_7                                |
| MGYG-HGUT-04486:s__F23-B02 sp003533405                   | 0.5<br>79<br>59<br>98<br>62 | 0.1<br>52<br>72<br>54<br>85      | 0.9<br>75<br>67<br>17<br>57 | d_<br>_B<br>act<br>eri<br>a | p__Fi<br>rmicu<br>tes_A         | c__Clo<br>stridia         | o__Os<br>cillospi<br>rales  | f__Oscil<br>lospirac<br>eae   | g__F23-<br>B02                        | s__F23-B02<br>sp003533405                          |
| MGYG-HGUT-04487:s__CAG-83 unknown_20                     | 0.1<br>76<br>82<br>91<br>92 | 0.3<br>66<br>90<br>63<br>88      | 0.8<br>91<br>82<br>55<br>59 | d_<br>_B<br>act<br>eri<br>a | p__Fi<br>rmicu<br>tes_A         | c__Clo<br>stridia         | o__Os<br>cillospi<br>rales  | f__Oscil<br>lospirac<br>eae   | g__CAG-<br>83                         | s__CAG-83<br>unknown_20                            |
| MGYG-HGUT-04489:s__ER4 unknown_8                         | 0.2<br>32<br>12<br>33<br>43 | 0.3<br>20<br>64<br>95<br>01      | 0.9<br>02<br>18<br>13<br>67 | d_<br>_B<br>act<br>eri<br>a | p__Fi<br>rmicu<br>tes_A         | c__Clo<br>stridia         | o__Os<br>cillospi<br>rales  | f__Oscil<br>lospirac<br>eae   | g__ER4                                | s__ER4<br>unknown_8                                |
| MGYG-HGUT-04491:s__Prevotella unknown_58                 | 0.6<br>74<br>66<br>27<br>09 | 0.1<br>15<br>06<br>98<br>46      | 0.9<br>75<br>67<br>17<br>57 | d_<br>_B<br>act<br>eri<br>a | p__B<br>acter<br>oidot<br>a     | c__Ba<br>cteroi<br>dia    | o__Bac<br>teroida<br>les    | f__Bact<br>eroidac<br>eae     | g__Prevot<br>ella                     | s__Prevotella<br>unknown_58                        |
| MGYG-HGUT-04496:s__Acutalibacteraceae unknown unknown_76 | 0.2<br>09<br>26<br>51<br>32 | 0.3<br>49<br>37<br>13<br>51      | 0.8<br>91<br>82<br>55<br>59 | d_<br>_B<br>act<br>eri<br>a | p__Fi<br>rmicu<br>tes_A         | c__Clo<br>stridia         | o__Os<br>cillospi<br>rales  | f__Acut<br>alibacte<br>raceae | g__Acutali<br>bacteracea<br>e unknown | s__Acutalibac<br>teraceae<br>unknown<br>unknown_76 |
| MGYG-HGUT-04497:s__Collinsella aerofaciens_F_37          | 0.7<br>38<br>09<br>51<br>12 | -<br>0.0<br>92<br>79<br>57<br>73 | 0.9<br>79<br>45<br>84<br>75 | d_<br>_B<br>act<br>eri<br>a | p__A<br>ctino<br>bacte<br>riota | c__Co<br>riobac<br>teriia | o__Cor<br>iobact<br>eriales | f__Cori<br>obacteri<br>aceae  | g__Collins<br>ella                    | s__Collinsella<br>aerofaciens_F<br>_37             |
| MGYG-HGUT-04500:s__Oscillibacter unknown_21              | 0.2<br>04<br>19<br>56<br>66 | 0.3<br>46<br>10<br>22<br>41      | 0.8<br>91<br>82<br>55<br>59 | d_<br>_B<br>act<br>eri<br>a | p__Fi<br>rmicu<br>tes_A         | c__Clo<br>stridia         | o__Os<br>cillospi<br>rales  | f__Oscil<br>lospirac<br>eae   | g__Oscillib<br>acter                  | s__Oscillibact<br>er<br>unknown_21                 |
| MGYG-HGUT-04505:s__Collinsella unknown_468               | 0.7<br>35<br>09<br>28<br>99 | 0.0<br>91<br>35<br>83<br>85      | 0.9<br>79<br>45<br>84<br>75 | d_<br>_B<br>act<br>eri<br>a | p__A<br>ctino<br>bacte<br>riota | c__Co<br>riobac<br>teriia | o__Cor<br>iobact<br>eriales | f__Cori<br>obacteri<br>aceae  | g__Collins<br>ella                    | s__Collinsella<br>unknown_46<br>8                  |

|                                            |             |                |             |             |                   |                   |                     |                      |                   |                            |
|--------------------------------------------|-------------|----------------|-------------|-------------|-------------------|-------------------|---------------------|----------------------|-------------------|----------------------------|
| MGYG-HGUT-04506:s__Collinsella unknown_469 | 0.80627012  | 0.066471479    | 0.987142302 | d__Bacteria | p__Actinobacteria | c__Coriobacteriia | o__Coriobacteriales | f__Coriobacteriaceae | g__Collinsella    | s__Collinsella unknown_469 |
| MGYG-HGUT-04514:s__Collinsella unknown_470 | 0.448706596 | -0.20613223462 | 0.961292208 | d__Bacteria | p__Actinobacteria | c__Coriobacteriia | o__Coriobacteriales | f__Coriobacteriaceae | g__Collinsella    | s__Collinsella unknown_470 |
| MGYG-HGUT-04520:s__Ruminococcus_E bromii_A | 0.258062899 | 0.313480617    | 0.907792127 | d__Bacteria | p__Firmicutes_A   | c__Clostridia     | o__Oscillospirales  | f__Acetivibrantaceae | g__Ruminococcus_E | s__Ruminococcus_E bromii_A |
| MGYG-HGUT-04522:s__Collinsella unknown_471 | 0.1570606   | 0.385094901    | 0.891825559 | d__Bacteria | p__Actinobacteria | c__Coriobacteriia | o__Coriobacteriales | f__Coriobacteriaceae | g__Collinsella    | s__Collinsella unknown_471 |
| MGYG-HGUT-04524:s__Collinsella unknown_472 | 0.109879119 | 0.43149607     | 0.883307256 | d__Bacteria | p__Actinobacteria | c__Coriobacteriia | o__Coriobacteriales | f__Coriobacteriaceae | g__Collinsella    | s__Collinsella unknown_472 |
| MGYG-HGUT-04525:s__CAG-83 unknown_21       | 0.558080278 | 0.150960544    | 0.968532073 | d__Bacteria | p__Firmicutes_A   | c__Clostridia     | o__Oscillospirales  | f__Oscillospiraceae  | g__CAG-83         | s__CAG-83 unknown_21       |
| MGYG-HGUT-04526:s__CAG-103 sp000432375     | 0.779784668 | -0.07878459311 | 0.979520484 | d__Bacteria | p__Firmicutes_A   | c__Clostridia     | o__Oscillospirales  | f__Oscillospiraceae  | g__CAG-103        | s__CAG-103 sp000432375     |
| MGYG-HGUT-04534:s__CAG-245 sp000434195     | 0.475701906 | -0.1019861331  | 0.9685373   | d__Bacteria | p__Firmicutes_A   | c__Clostridia     | o__TANB77           | f__CAG-508           | g__CAG-245        | s__CAG-245 sp000434195     |
| MGYG-HGUT-04542:s__Collinsella unknown_473 | 0.213697128 | 0.338570486    | 0.891825559 | d__Bacteria | p__Actinobacteria | c__Coriobacteriia | o__Coriobacteriales | f__Coriobacteriaceae | g__Collinsella    | s__Collinsella unknown_473 |

|                                                       |                             |                                  |                             |                             |                             |                        |                             |                                |                                   |                                                 |
|-------------------------------------------------------|-----------------------------|----------------------------------|-----------------------------|-----------------------------|-----------------------------|------------------------|-----------------------------|--------------------------------|-----------------------------------|-------------------------------------------------|
| MGYG-HGUT-04544:s__Alistipes sp900290115              | 0.3<br>55<br>59<br>71<br>07 | 0.2<br>56<br>95<br>70<br>84      | 0.9<br>39<br>70<br>92<br>5  | d_<br>_B<br>act<br>eri<br>a | p__B<br>acter<br>oidot<br>a | c__Ba<br>cteroi<br>dia | o__Bac<br>teroida<br>les    | f__Rike<br>nellacea<br>e       | g__Aliste<br>pe<br>s              | s__Alistipes<br>sp900290115                     |
| MGYG-HGUT-04548:s__Lachnospiraceae unknown unknown_42 | 0.4<br>14<br>41<br>56<br>41 | 0.2<br>25<br>70<br>07<br>74      | 0.9<br>39<br>70<br>92<br>5  | d_<br>_B<br>act<br>eri<br>a | p__Fi<br>rmicu<br>tes_A     | c__Clo<br>stridia      | o__Lac<br>hnospi<br>rales   | f__Lach<br>nospi<br>rac<br>eae | g__Lachno<br>spiraceae<br>unknown | s__Lachnospir<br>aceae<br>unknown<br>unknown_42 |
| MGYG-HGUT-04552:s__UBA7096 unknown_8                  | 0.8<br>00<br>40<br>07<br>31 | -<br>0.0<br>67<br>67<br>19<br>71 | 0.9<br>87<br>10<br>56<br>64 | d_<br>_B<br>act<br>eri<br>a | p__Fi<br>rmicu<br>tes_A     | c__Clo<br>stridia      | o__Lac<br>hnospi<br>rales   | f__Lach<br>nospi<br>rac<br>eae | g__UBA70<br>96                    | s__UBA7096<br>unknown_8                         |
| MGYG-HGUT-04558:s__Faecalicatena unknown_16           | 0.0<br>80<br>10<br>62<br>71 | -<br>0.4<br>77<br>95<br>27<br>76 | 0.8<br>77<br>82<br>62<br>47 | d_<br>_B<br>act<br>eri<br>a | p__Fi<br>rmicu<br>tes_A     | c__Clo<br>stridia      | o__Lac<br>hnospi<br>rales   | f__Lach<br>nospi<br>rac<br>eae | g__Faecali<br>catena              | s__Faecalicat<br>ena<br>unknown_16              |
| MGYG-HGUT-04560:s__UBA737 unknown_18                  | 0.6<br>86<br>62<br>16<br>61 | -<br>0.1<br>12<br>72<br>35<br>92 | 0.9<br>75<br>76<br>85<br>79 | d_<br>_B<br>act<br>eri<br>a | p__Fi<br>rmicu<br>tes_A     | c__Clo<br>stridia      | o__Os<br>cillospi<br>rales  | f__Acut<br>alibacte<br>raceae  | g__UBA73<br>7                     | s__UBA737<br>unknown_18                         |
| MGYG-HGUT-04562:s__Gemella morbillorum                | 0.9<br>09<br>33<br>15<br>08 | -<br>0.0<br>31<br>39<br>10<br>26 | 0.9<br>94<br>47<br>94<br>74 | d_<br>_B<br>act<br>eri<br>a | p__Fi<br>rmicu<br>tes       | c__Ba<br>cilli         | o__Sta<br>phyloc<br>occales | f__Gem<br>ellaceae             | g__Gemell<br>a                    | s__Gemella<br>morbillorum                       |
| MGYG-HGUT-04571:s__UBA6382 unknown                    | 0.7<br>19<br>50<br>44<br>54 | -<br>0.0<br>94<br>50<br>15<br>19 | 0.9<br>79<br>45<br>84<br>75 | d_<br>_B<br>act<br>eri<br>a | p__B<br>acter<br>oidot<br>a | c__Ba<br>cteroi<br>dia | o__Bac<br>teroida<br>les    | f__Bact<br>eroidac<br>eae      | g__UBA63<br>82                    | s__UBA6382<br>unknown                           |
| MGYG-HGUT-04572:s__Dorea unknown_6                    | 0.5<br>21<br>81<br>01<br>82 | -<br>0.1<br>77<br>52<br>89<br>79 | 0.9<br>68<br>53<br>20<br>73 | d_<br>_B<br>act<br>eri<br>a | p__Fi<br>rmicu<br>tes_A     | c__Clo<br>stridia      | o__Lac<br>hnospi<br>rales   | f__Lach<br>nospi<br>rac<br>eae | g__Dorea                          | s__Dorea<br>unknown_6                           |

|                                                        |                                  |                                           |                                  |             |                   |                   |                     |                      |                             |                                        |
|--------------------------------------------------------|----------------------------------|-------------------------------------------|----------------------------------|-------------|-------------------|-------------------|---------------------|----------------------|-----------------------------|----------------------------------------|
| MGYG-HGUT-04579:s__Coproccus_B unknown_2               | 0.277<br>0.255<br>0.223<br>0.263 | 0.284<br>0.254<br>0.260<br>0.294          | 0.929<br>0.902<br>0.959<br>0.913 | d__Bacteria | p__Firmicutes_A   | c__Clostridia     | o__Lachnospirales   | f__Lachnospiraceae   | g__Coproccus_B              | s__Coproccus_B unknown_2               |
| MGYG-HGUT-04580:s__Oscillospiraceae unknown unknown_23 | 0.618<br>0.224<br>0.331<br>0.092 | 0.133<br>0.223<br>0.196<br>0.157          | 0.975<br>0.667<br>0.171<br>0.957 | d__Bacteria | p__Firmicutes_A   | c__Clostridia     | o__Oscillospirales  | f__Oscillospiraceae  | g__Oscillospiraceae unknown | s__Oscillospiraceae unknown unknown_23 |
| MGYG-HGUT-04581:s__Coproccus_A unknown                 | 0.220<br>0.515<br>0.686<br>0.211 | 0.339<br>0.070<br>0.303<br>0.285          | 0.891<br>0.822<br>0.555<br>0.595 | d__Bacteria | p__Firmicutes_A   | c__Clostridia     | o__Lachnospirales   | f__Lachnospiraceae   | g__Coproccus_A              | s__Coproccus_A unknown                 |
| MGYG-HGUT-04582:s__CAG-81 unknown_2                    | 0.554<br>0.665<br>0.202<br>0.225 | -0.164<br>0.153<br>0.452<br>0.628<br>0.83 | 0.968<br>0.535<br>0.202<br>0.737 | d__Bacteria | p__Firmicutes_A   | c__Clostridia     | o__Lachnospirales   | f__Lachnospiraceae   | g__CAG-81                   | s__CAG-81 unknown_2                    |
| MGYG-HGUT-04586:s__Ruminococcus_C unknown_3            | 0.306<br>0.727<br>0.014          | 0.284<br>0.363<br>0.222<br>0.531          | 0.929<br>0.020<br>0.595<br>0.131 | d__Bacteria | p__Firmicutes_A   | c__Clostridia     | o__Oscillospirales  | f__Ruminococcaeae    | g__Ruminococcus_C           | s__Ruminococcus_C unknown_3            |
| MGYG-HGUT-04593:s__CAG-194 sp000432915                 | 0.668<br>0.079<br>0.983<br>0.333 | 0.115<br>0.176<br>0.617<br>0.635          | 0.975<br>0.676<br>0.171<br>0.957 | d__Bacteria | p__Firmicutes_A   | c__Clostridia     | o__Lachnospirales   | f__Lachnospiraceae   | g__CAG-194                  | s__CAG-194 sp000432915                 |
| MGYG-HGUT-04597:s__Collinsella unknown_478             | 0.039<br>0.112<br>0.062<br>0.222 | 0.560<br>0.782<br>0.795<br>0.193          | 0.768<br>0.222<br>0.585<br>0.343 | d__Bacteria | p__Actinobacteria | c__Coriobacteriia | o__Coriobacteriales | f__Coriobacteriaceae | g__Collinsella              | s__Collinsella unknown_478             |
| MGYG-HGUT-04599:s__Bacteroides_A unknown_15            | 0.623<br>0.019<br>0.916<br>0.644 | 0.137<br>0.121<br>0.343<br>0.474          | 0.975<br>0.676<br>0.171<br>0.957 | d__Bacteria | p__Bacteroidetes  | c__Bacteroidia    | o__Bacteroidales    | f__Bacteroidaceae    | g__Bacteroides_A            | s__Bacteroides_A unknown_15            |
| MGYG-HGUT-04600:s__CAG-307 sp001916215                 | 0.632<br>0.957<br>0.757<br>0.811 | 0.134<br>0.121<br>0.351<br>0.085          | 0.975<br>0.676<br>0.171<br>0.957 | d__Bacteria | p__Firmicutes     | c__Bacilli        | o__Acidobacteriales | f__CAG-307           | g__CAG-307                  | s__CAG-307 sp001916215                 |

|                                                 |                             |                                  |                             |                             |                                 |                           |                                   |                                |                      |                                        |
|-------------------------------------------------|-----------------------------|----------------------------------|-----------------------------|-----------------------------|---------------------------------|---------------------------|-----------------------------------|--------------------------------|----------------------|----------------------------------------|
| MGYG-HGUT-04602:s__Collinsella aerofaciens_F_39 | 0.0<br>17<br>66<br>48<br>17 | 0.6<br>36<br>29<br>19<br>24      | 0.7<br>68<br>22<br>58<br>34 | d_<br>_B<br>act<br>eri<br>a | p__A<br>ctino<br>bacte<br>riota | c__Co<br>riobac<br>teriia | o__Cor<br>iobact<br>eriales       | f__Cori<br>obacteri<br>aceae   | g__Collins<br>ella   | s__Collinsella<br>aerofaciens_F<br>_39 |
| MGYG-HGUT-04603:s__Streptococcus oralis_V       | 0.4<br>70<br>59<br>50<br>44 | 0.1<br>99<br>70<br>78<br>66      | 0.9<br>68<br>19<br>40<br>79 | d_<br>_B<br>act<br>eri<br>a | p__Fi<br>rmicu<br>tes           | c__Ba<br>cilli            | o__Lac<br>tobacill<br>ales        | f__Stre<br>ptococc<br>aceae    | g__Strepto<br>coccus | s__Streptococ<br>cus oralis_V          |
| MGYG-HGUT-04607:s__Collinsella unknown_479      | 0.0<br>33<br>16<br>26<br>14 | 0.5<br>89<br>96<br>46<br>22      | 0.7<br>68<br>22<br>58<br>34 | d_<br>_B<br>act<br>eri<br>a | p__A<br>ctino<br>bacte<br>riota | c__Co<br>riobac<br>teriia | o__Cor<br>iobact<br>eriales       | f__Cori<br>obacteri<br>aceae   | g__Collins<br>ella   | s__Collinsella<br>unknown_47<br>9      |
| MGYG-HGUT-04608:s__Collinsella unknown_480      | 0.6<br>89<br>86<br>30<br>53 | 0.1<br>11<br>31<br>28<br>06      | 0.9<br>75<br>76<br>85<br>79 | d_<br>_B<br>act<br>eri<br>a | p__A<br>ctino<br>bacte<br>riota | c__Co<br>riobac<br>teriia | o__Cor<br>iobact<br>eriales       | f__Cori<br>obacteri<br>aceae   | g__Collins<br>ella   | s__Collinsella<br>unknown_48<br>0      |
| MGYG-HGUT-04609:s__Faecalibacterium unknown_17  | 0.2<br>99<br>33<br>74<br>47 | -<br>0.2<br>89<br>94<br>87<br>72 | 0.9<br>29<br>02<br>59<br>13 | d_<br>_B<br>act<br>eri<br>a | p__Fi<br>rmicu<br>tes_A         | c__Clo<br>stridia         | o__Lac<br>hnospi<br>rales         | f__Lach<br>nospira<br>ceae     | g__Faecali<br>catena | s__Faecalicat<br>ena<br>unknown_17     |
| MGYG-HGUT-04610:s__Faecalibacterium unknown_2   | 0.0<br>80<br>00<br>30<br>34 | 0.4<br>87<br>21<br>45<br>69      | 0.8<br>77<br>82<br>62<br>47 | d_<br>_B<br>act<br>eri<br>a | p__Fi<br>rmicu<br>tes           | c__Ba<br>cilli            | o__Ery<br>sipelot<br>richale<br>s | f__Erysi<br>pelotric<br>haceae | g__Faecali<br>coccus | s__Faecalicoc<br>cus<br>unknown_2      |
| MGYG-HGUT-04618:s__Anaerotruncus sp900199635    | 0.2<br>38<br>83<br>19<br>47 | -<br>0.3<br>23<br>06<br>32<br>72 | 0.9<br>02<br>18<br>13<br>67 | d_<br>_B<br>act<br>eri<br>a | p__Fi<br>rmicu<br>tes_A         | c__Clo<br>stridia         | o__Os<br>cillospi<br>rales        | f__Rumi<br>nococca<br>ceae     | g__Anaero<br>truncus | s__Anaerotr<br>uncus<br>sp900199635    |
| MGYG-HGUT-04623:s__Blautia_A unknown_22         | 0.1<br>78<br>74<br>47<br>48 | 0.3<br>74<br>32<br>45<br>88      | 0.8<br>91<br>82<br>55<br>59 | d_<br>_B<br>act<br>eri<br>a | p__Fi<br>rmicu<br>tes_A         | c__Clo<br>stridia         | o__Lac<br>hnospi<br>rales         | f__Lach<br>nospira<br>ceae     | g__Blautia<br>_A     | s__Blautia_A<br>unknown_22             |
| MGYG-HGUT-04625:s__Collinsella unknown_482      | 0.7<br>91<br>57<br>84<br>12 | 0.0<br>73<br>30<br>48<br>41      | 0.9<br>82<br>96<br>63       | d_<br>_B<br>act<br>eri<br>a | p__A<br>ctino<br>bacte<br>riota | c__Co<br>riobac<br>teriia | o__Cor<br>iobact<br>eriales       | f__Cori<br>obacteri<br>aceae   | g__Collins<br>ella   | s__Collinsella<br>unknown_48<br>2      |

|                                                       |             |             |             |               |                 |               |                         |                              |                           |                                       |
|-------------------------------------------------------|-------------|-------------|-------------|---------------|-----------------|---------------|-------------------------|------------------------------|---------------------------|---------------------------------------|
| MGYG-HGUT-04628:s__Lawsonibacter unknown_11           | 0.629691675 | -0.13498025 | 0.975671757 | d__Bacteriota | p__Firmicutes_A | c__Clostridia | o__Oscillospirales      | f__Oscillospiraceae          | g__Lawsonibacter          | s__Lawsonibacter unknown_11           |
| MGYG-HGUT-04631:s__Mogibacterium sp900315625          | 0.9754396   | 0.008745419 | 0.996587801 | d__Bacteriota | p__Firmicutes_A | c__Clostridia | o__Peptostreptococcales | f__Anaerovoracaceae          | g__Mogibacterium          | s__Mogibacterium sp900315625          |
| MGYG-HGUT-04633:s__Erysipelatoclostridium sp002160495 | 0.661523055 | 0.122930436 | 0.975671757 | d__Bacteriota | p__Firmicutes   | c__Bacilli    | o__Erysipelotrichales   | f__Erysipelatoclostridiaceae | g__Erysipelatoclostridium | s__Erysipelatoclostridium sp002160495 |
| MGYG-HGUT-04643:s__Eubacterium_R sp003526845          | 0.141058313 | 0.398044387 | 0.891825559 | d__Bacteriota | p__Firmicutes_A | c__Clostridia | o__Oscillospirales      | f__Acetivibrionaceae         | g__Eubacterium_R          | s__Eubacterium_R sp003526845          |
| MGYG-HGUT-04644:s__Negativibacillus unknown_4         | 0.93730613  | 0.021418574 | 0.994479474 | d__Bacteriota | p__Firmicutes_A | c__Clostridia | o__Oscillospirales      | f__Ruminococcaceae           | g__Negativibacillus       | s__Negativibacillus unknown_4         |



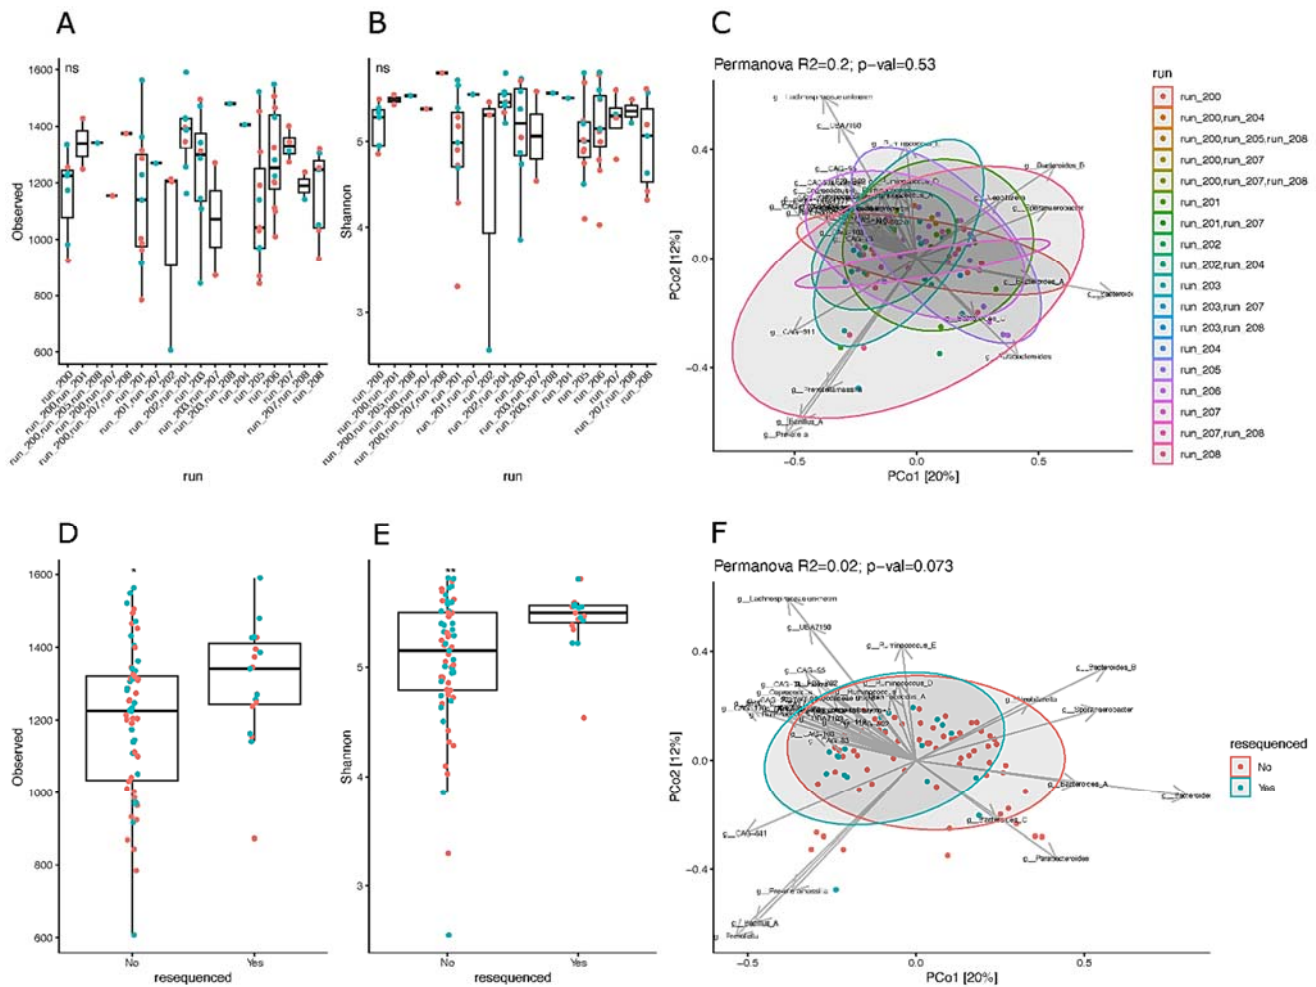

**Supplemental Figure 1: Assessment of batch effects associated with the Nanopore sequencing process.** Boxplot of species richness (A) and Shannon diversity (B) across samples sequenced in different runs (ns=p-value>0.05 Kruskal-Wallis test). (C) PCoA ordination based on Bray-Curtis beta-diversity matrix computed from genus-level abundance data. Samples are colored based on the sequencing run. PERMANOVA results of the impact of sequencing run on microbiome composition is shown at the top of the PCoA. Abundance vectors of 18 bacterial genera with the most significant associations with the k=3 enterotypes (FDR<0.05; Kruskal-Wallis test; Supplemental Figure 2) are fitted on the ordination plot with envfit function of the vegan R package. (D) Boxplot of species richness across samples that have been sequenced >1 time (resequenced=Yes) vs. samples sequenced only once (resequenced=No). \*p-value<0.05, Wilcoxon rank-sum test. (E) Same as D for Shannon's diversity. \*\*p-value<0.01 Wilcoxon rank-sum test. (F) Same as C coloring samples by the resequencing status.

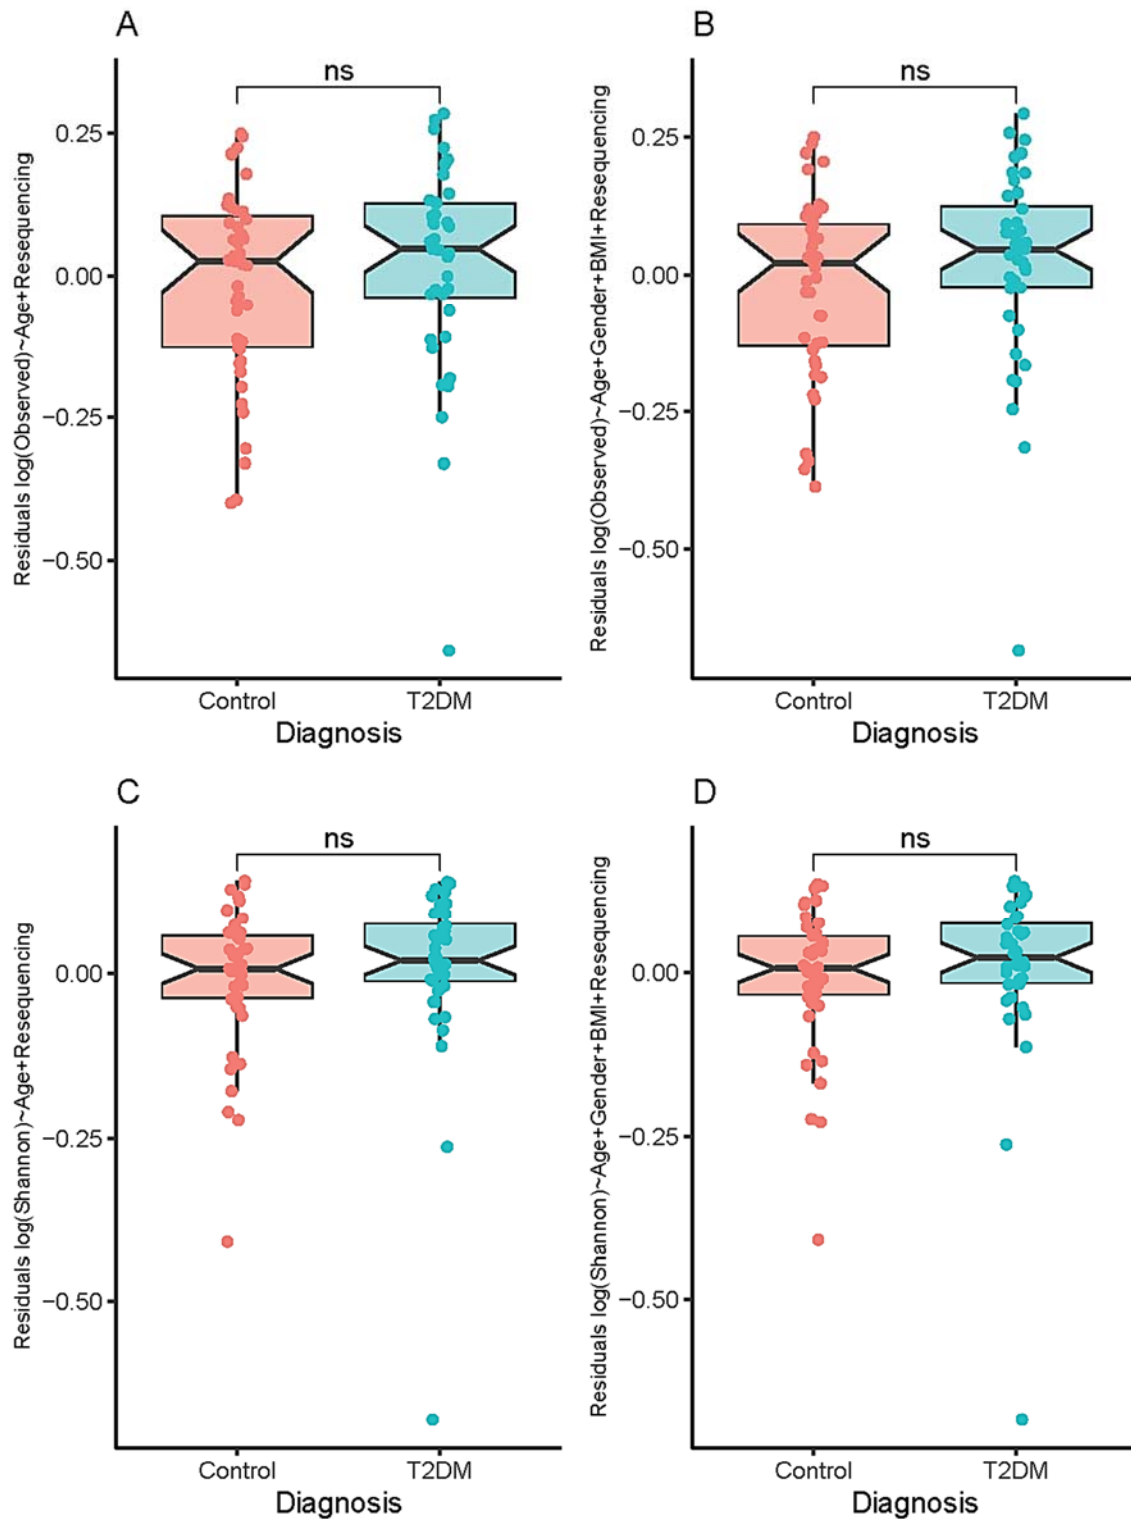

**Supplemental Figure 2: Confounder-adjusted diversity distributions across the study cohort.**

(A) and (B) panels represent the distributions of the residuals of linear regression models of species richness by Age+Resequencing status and Age+gender+BMI+Resequencing status respectively between T2DM and Control groups. (C) and (D) panels correspond to the same analyses for species evenness (Shannon index). ns=p-value<0.05; Wilcoxon rank-sum test.

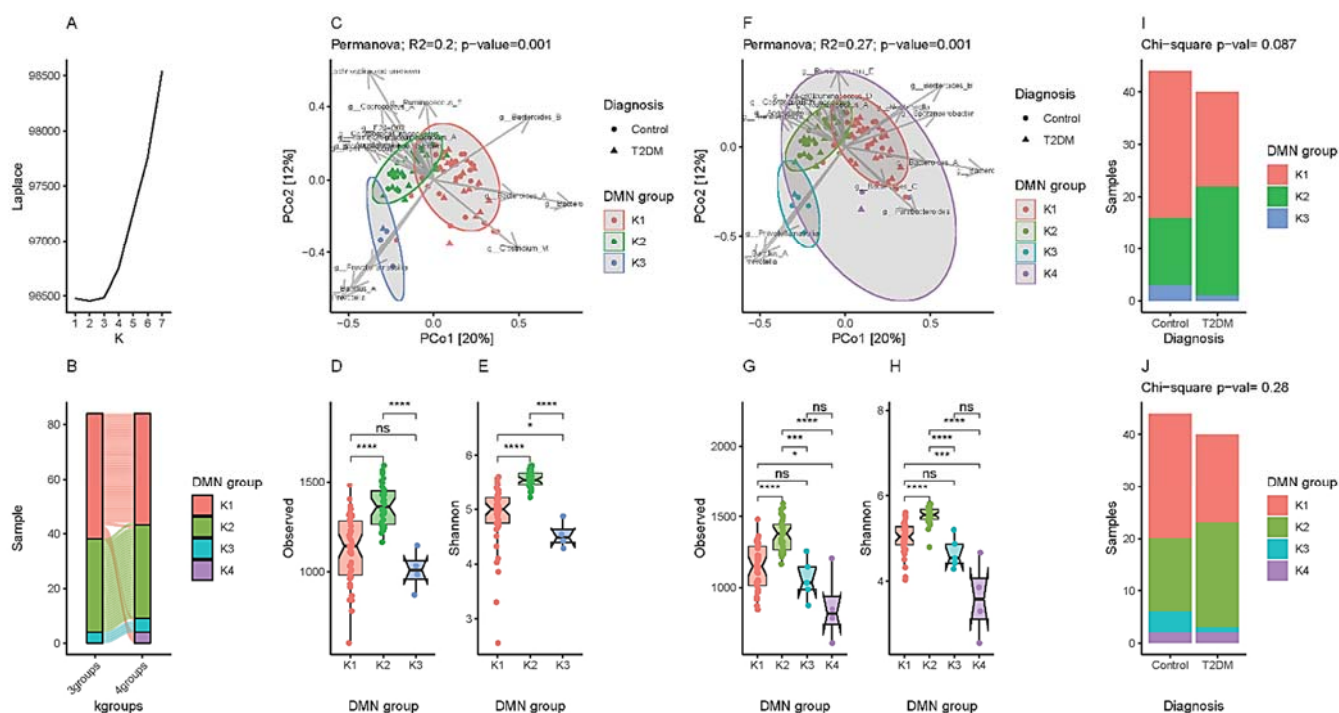

**Supplemental Figure 3: Enterotype composition of the study cohort.** (A) Line plot of the minimum Laplace metric (Information criterion) used to define the optimal number of clusters (enterotypes) in the study cohort (N=84 individuals) with Dirichlet-Multinomial-Mixture (DMM)-based community-typing. (B) Alluvial plot representing the change in enterotype assignment between K=3 and K=4 in the DMM approach. (C) PCoA (genus-level Bray-Curtis beta-diversity) visualizing the stratification at K=3 enterotypes (colored data points) resulting from community-typing using the DMM approach (on genus-level fecal microbiome profiles, with a shape representing the clinical group). Abundance vectors of 18 bacterial genera with significant association with the k=3 enterotypes (FDR<0.05; Kruskal-Wallis test) are fitted on the ordination plot with envfit function of vegan R package. (D) Species richness and (E) evenness distributions across k=4 enterotypes (ns=non-significant; \*\*=p-value<0.01; \*\*\*\*=p-value<0.0001. Wilcoxon rank-sum test). (F) Same as (B) coloring points by the stratification at K=4 groups. (G) and (H) same as (D) and (E) respectively for the stratification of the cohort into k=4 groups (I) Enterotype composition of the control (n=44) and T2DM (n=40) groups based on the 3 groups decomposition of the study cohort with the DMM approach. (J) same as (I) for the stratification of the cohort into k=4 groups.

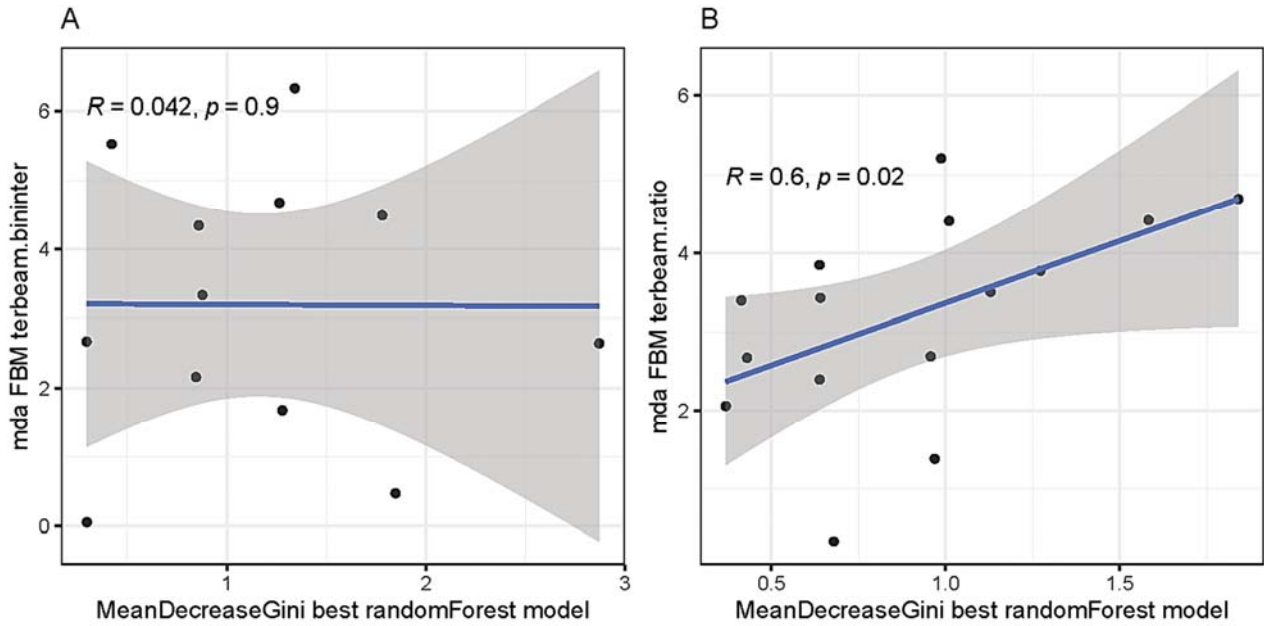

**Supplementary Figure 4: Comparison of feature importance values of features in Predomics models vs. best Random Forest models.** (A) Scatterplot of the mean decrease accuracy (mda) of 12 species features in the Family of Best Models (FBM) retrieved by Predomics on species abundance data (Figure 4E) and the corresponding feature importance in the best Random Forest model (Mean Decrease Gini) for the same classification task (control vs. T2D groups). (B) Same as (A) with the 14 species features in the FBM retrieved by Predomics on species presence/absence data (Figure 5E).
